# Supplementary material for: Individualized Proteogenomics Reveals the Mutational Landscape of Melanoma Patients in Response to Immunotherapy
Source: Cancers (Basel). 2021 Oct 28;13(21):5411. doi: 10.3390/cancers13215411 (PMC8582461; doi:10.3390/cancers13215411)
Supplement: Supplementary file 1 [file cancers-13-05411-s001.zip]

Archive with 5 entries (5 files):
- cancers-1421686 Supplementary Figures.pdf
- cancers-1421686 Table S1.xlsx
- cancers-1421686 Table S2.xlsx
- cancers-1421686 Table S3.xlsx
- cancers-1421686 Table S4.xlsx
