# Supplementary material for: Individualized Proteogenomics Reveals the Mutational Landscape of Melanoma Patients in Response to Immunotherapy
Source: Cancers (Basel). 2021 Oct 28;13(21):5411. doi: 10.3390/cancers13215411 (PMC8582461; doi:10.3390/cancers13215411)
Supplement: Supplementary file 1 [file cancers-13-05411-s001.zip › cancers-1421686 Table S3.xlsx]

## Sheet: Legend
Integration of genomics, proteomics and drug database prioritizes actionable targets
Table	Description
Sheet 0	Column descriptions for Sheet 1-Sheet 5
Sheet 1	Interaction network of omics significantly changing entries for patient ID 101
Sheet 2	Interaction network of omics significantly changing entries for patient ID 110
Sheet 3	Interaction network of omics significantly changing entries for patient ID 111
Sheet 4	Interaction network of omics significantly changing entries for patient ID 129
Sheet 5	Patient-specific drugs prediction

## Sheet: Sheet 0
Sheet 1-4	Interaction network of omics significantly changing entries per patients
Column	Description
ID	The network node id
biogrid	The network node BioGRID id
label	The network node BioGRID gene name
DrugBank ID	The network node can be targeted by the(se) drug(s) id based on DrugBank database
DrugBank name	The network node can be targeted by the(se) drug(s) name(s) based on DrugBank database
Specificity	The reported drug(s) have the following specificity to the target node
Druggable	Whether the network node can be targeted by at least one drug
CrossDB ID	The protein ID in either Ensembl or UniProt
Omics	The node was identified significant (based on highest absolute ratio) in the following omics datasets (e.g. variants, transcripts)
Ratio	The node maximum abundance ratio (between ICi-treated and naïve samples) across all omics datasets
Samples	In which sample was the node found with the maximum up-regulated ratio
Scaled impact score	If the node was identified mutated by WES, the associated maximum variant scaled impact score (focus on cancer and immune-checkpoint), with -0.1 = no identified variant and 0 = low impact up to 1 = high impact
Sheet 5	Patient-specific drugs prediction
Column	Description
DrugBank ID	The network-predicted drug id based on DrugBank database
DrugBank name	The network-predicted drug name based on DrugBank database
targets	The name of protein(s) that can be targetted by the predicted drug
Specificity	The drug has the following specificity to the target protein(s)
Patient	In which patient was the drug predicted to have a therapeutical effect
Cumulative degree	The sum of all protein-protein interaction the target(s) have
Target_count	How many protein(s) are targetted by the drug
Count in cohort	The drug was predicted across that many patients from this study (between 1 and 4)
Used in cancer	Is the drug already used in oncotherapy ("+" means it is a known therapy)
Used in melanoma	Is the drug already used in melanoma-therapy ("+" means it is a known therapy)

## Sheet: Sheet 1
Interaction network of omics significantly changing entries for patient ID 101
ID	biogrid	label	DrugBank ID	DrugBank name	Specificity	Druggable	CrossDB ID	Omics	Ratio	Samples	Scaled impact score
1	108276	EGFR	DB00002;DB00072;DB00281;DB00317;DB00530;DB01259;DB01269;DB05294;DB08916;DB09330;DB09559;DB10772;DB11828;DB11963;DB12010;DB12267	Cetuximab;Trastuzumab;Lidocaine;Gefitinib;Erlotinib;Lapatinib;Panitumumab;Vandetanib;Afatinib;Osimertinib;Necitumumab;Foreskin keratinocyte (neonatal);Neratinib;Dacomitinib;Fostamatinib;Brigatinib	0.0833333333333333;0.0769230769230769;0.142857142857143;1;0.5;0.5;1;0.2;0.333333333333333;1;1;0.0833333333333333;1;1;0.00333333333333333;0.111111111111111	Druggable	ENSP00000342376	Proteome	-4.71893	Melanocytes	0.285714
2	114397	SQSTM1				Not druggable	ENSP00000374455	Phospho	5.61137	PDX_101	-0.1
3	109142	GRB2	DB00061	Pegademase bovine	1	Druggable	ENSP00000317360	Proteome	2.04164	PDX_101	-0.1
4	110811	NEDD4				Not druggable	ENSP00000345530	Proteome	-4.77633	Melanocytes	0.285714
5	114563	LATS1	DB12010	Fostamatinib	0.00333333333333333	Druggable	ENSP00000437550	Proteome	-4.07619	Melanocytes	0.285714
6	107434	CDH1				Not druggable	ENSP00000261769	Proteome	4.4775	FFPE_101	-0.1
7	115684	YAP1				Not druggable	ENSP00000331023	Proteome	-4.35099	Melanocytes	-0.1
8	112481	SMARCA4				Not druggable	ENSP00000343896	Phospho	3.55665	PDX_101	-0.1
9	107881	CTNND1				Not druggable	ENSP00000351527	Phospho	-6.13951	Melanocytes	0.285714
10	112697	SUPT5H				Not druggable	ENSP00000384505	Phospho	6.70468	PDX_101	-0.1
11	109211	MSH6				Not druggable	ENSP00000446475	Phospho	3.03481	PDX_101	0.285714
12	112872	TERF1				Not druggable	ENSP00000276602	Phospho	3.34208	PDX_101	-0.1
13	107160	BTK	DB01254;DB09053;DB11703;DB12010	Dasatinib;Ibrutinib;Acalabrutinib;Fostamatinib	0.0434782608695652;1;1;0.00333333333333333	Druggable	ENSP00000308176	Proteome	5.73397	PDX_101	-0.1
14	108773	FTH1	DB00893;DB01592;DB13995;DB14488;DB14489;DB14490;DB14491;DB14501	Iron Dextran;Iron;Ferric pyrophosphate citrate;Ferrous gluconate;Ferrous succinate;Ferrous ascorbate;Ferrous fumarate;Ferrous glycine sulfate	0.25;0.0769230769230769;0.25;0.0769230769230769;0.0769230769230769;0.0769230769230769;0.0769230769230769;0.0769230769230769	Druggable	ENSP00000273550	Proteome	3.12907	FFPE_101	-0.1
15	108789	FTL	DB00893;DB09517;DB13995	Iron Dextran;Sodium ferric gluconate complex;Ferric pyrophosphate citrate	0.25;0.333333333333333;0.25	Druggable	ENSP00000366525	Proteome	4.86215	FFPE_101	-0.1
16	109512	PRMT1				Not druggable	ENSP00000375724	Proteome	-6.17804	Melanocytes	-0.1
17	110341	MCM4				Not druggable	ENSP00000262105	Proteome	-7.63475	Melanocytes	0.142857
18	111142	PCNA	DB00279	Liothyronine	0.333333333333333	Druggable	ENSP00000368438	Proteome	-4.78412	Melanocytes	-0.1
19	111566	PRKCD	DB00675;DB05013;DB12010	Tamoxifen;Ingenol Mebutate;Fostamatinib	0.111111111111111;0.5;0.00333333333333333	Druggable	ENSP00000331602	Proteome	3.02437	PDX_101	-0.1
20	108480	PTK2B	DB01097;DB11817;DB12010	Leflunomide;Baricitinib;Fostamatinib	0.333333333333333;0.25;0.00333333333333333	Druggable	ENSP00000391995	Proteome	2.72964	PDX_101	0.285714
21	108565	FHL2				Not druggable	ENSP00000322909	Proteome	-8.77955	Melanocytes	-0.1
22	109032	GNAI1				Not druggable	ENSP00000343027	Proteome	-3.2077	Melanocytes	-0.1
23	109351	HLA-B				Not druggable	ENSP00000399168	Proteome	3.17423	PDX_101	0.142857
24	110172	LIMK1	DB08912;DB12010	Dabrafenib;Fostamatinib	0.2;0.00333333333333333	Druggable	ENSP00000336740	Proteome	3.30231	PDX_101	-0.1
25	110339	MCM2				Not druggable	ENSP00000265056	Phospho	4.85004	PDX_101	-0.1
26	111494	PPP1CB				Not druggable	ENSP00000351298	Phospho	4.65103	PDX_101	-0.1
27	111811	RAB27A				Not druggable	ENSP00000337761	Proteome	2.18773	PDX_101	-0.1
28	112649	STAT1				Not druggable	ENSP00000354394	Proteome	2.7835	PDX_101	-0.1
29	113272	VIM				Not druggable	ENSP00000446007	Phospho	-6.55336	Melanocytes	0.142857
30	114364	CFLAR				Not druggable	ENSP00000339335	Proteome	2.8632	PDX_101	-0.1
31	106586	ACTG1	DB09130	Copper	0.00680272108843537	Druggable	ENSP00000458435	Phospho	8.24688	PDX_101	0
32	106901	ARRB1				Not druggable	ENSP00000353124	Proteome	3.65807	FFPE_101	-0.1
33	107305	CAV1				Not druggable	ENSP00000339191	Proteome	-2.72541	Melanocytes	-0.1
34	107487	CENPA				Not druggable	ENSP00000233505	Phospho	-7.63401	Melanocytes	-0.1
35	108621	FN1	DB01593;DB08888;DB14487;DB14533	Zinc;Ocriplasmin;Zinc acetate;Zinc chloride	0.00806451612903226;0.333333333333333;0.00806451612903226;0.00806451612903226	Druggable	ENSP00000323534	Proteome	-8.32423	Melanocytes	0.428571
36	108827	GABPB1				Not druggable	ENSP00000351923	Proteome	2.60781	PDX_101	-0.1
37	109202	GSTM3	DB00143	Glutathione	0.0238095238095238	Druggable	ENSP00000256594	Proteome	-5.69196	Melanocytes	0
38	109547	HSPB1				Not druggable	ENSP00000248553	Proteome	-2.48484	Melanocytes	-0.1
39	109736	RBPJ				Not druggable	ENSP00000345206	Proteome	1.68726	PDX_101	-0.1
40	111748	PTPN14				Not druggable	ENSP00000355923	Proteome	-6.21904	Melanocytes	-0.1
41	112485	SMARCC2				Not druggable	ENSP00000377591	Phospho	5.97758	PDX_101	-0.1
42	112651	STAT3				Not druggable	ENSP00000264657	Proteome	1.83872	PDX_101	-0.1
43	112695	SUPT4H1				Not druggable	ENSP00000225504	Proteome	2.298	PDX_101	-0.1
44	112967	TMPO				Not druggable	ENSP00000266732	Phospho	-7.58583	Melanocytes	-0.1
45	113012	TP53BP2				Not druggable	ENSP00000341957	Proteome	-2.89126	Melanocytes	0.285714
46	113021	TPM1				Not druggable	ENSP00000288398	Proteome	-4.18071	Melanocytes	-0.1
47	113037	TRAF1				Not druggable	ENSP00000438583	Proteome	2.62467	PDX_101	-0.1
48	114809	TJP2				Not druggable	ENSP00000345893	Phospho	4.36719	PDX_101	0.142857
49	115015	IQCB1				Not druggable	ENSP00000311505	Proteome	4.32105	PDX_101	0.142857
50	115721	BAIAP2				Not druggable	ENSP00000461144	Proteome	-2.76063	Melanocytes	-0.1
51	116473	GABARAPL2				Not druggable	ENSP00000037243	Proteome	2.18143	PDX_101	-0.1
52	119923	ERRFI1				Not druggable	ENSP00000366702	Proteome	-5.5986	Melanocytes	-0.1
53	121722	FANCM				Not druggable	ENSP00000267430	Proteome	-4.43003	Melanocytes	0.285714
54	106884	RHOG				Not druggable	ENSP00000339467	Proteome	2.20544	PDX_101	-0.1
55	107036	AXL	DB12010;DB12141	Fostamatinib;Gilteritinib	0.00333333333333333;0.25	Druggable	ENSP00000301178	Proteome	-4.61756	Melanocytes	-0.1
56	107396	CD40				Not druggable	ENSP00000361350	Proteome	4.53399	PDX_101	-0.1
57	107433	CDC42				Not druggable	ENSP00000314458	Proteome	2.89748	PDX_101	-0.1
58	107435	CDH2				Not druggable	ENSP00000269141	Proteome	-4.9532	Melanocytes	-0.1
59	108002	DCN	DB03754	Tromethamine	0.0769230769230769	Druggable	ENSP00000376862	Proteome	6.03959	FFPE_101	-0.1
60	108082	DLD	DB00157;DB03147	NADH;Flavin adenine dinucleotide	0.00694444444444444;0.0116279069767442	Druggable	ENSP00000205402	Proteome	1.88523	PDX_101	-0.1
61	108332	CTTN				Not druggable	ENSP00000301843	Phospho	-9.16048	Melanocytes	-0.1
62	108460	F13A1	DB01839;DB11300;DB11311;DB11571;DB11572;DB13151	Propylene glycol;Thrombin;Prothrombin;Human Thrombin;Thrombin Alfa;Anti-inhibitor coagulant complex	0.2;0.1;0.25;0.125;0.125;0.125	Druggable	ENSP00000264870	Proteome	4.7109	FFPE_101	0.142857
63	109610	ICAM1	DB00108;DB08818	Natalizumab;Hyaluronic acid	0.0833333333333333;0.0666666666666667	Druggable	ENSP00000264832	Proteome	3.45312	PDX_101	0.285714
64	109894	ITGB1	DB00098	Antithymocyte immunoglobulin (rabbit)	0.111111111111111	Druggable	ENSP00000303351	Proteome	-3.05945	Melanocytes	-0.1
65	110391	MET	DB08865;DB08875;DB12010;DB12267	Crizotinib;Cabozantinib;Fostamatinib;Brigatinib	0.5;0.333333333333333;0.00333333333333333;0.111111111111111	Druggable	ENSP00000380860	Proteome	-6.12732	Melanocytes	0.142857
66	110846	NFATC2				Not druggable	ENSP00000360619	Proteome	6.11915	PDX_101	0.142857
67	111529	PPP6C				Not druggable	ENSP00000362648	Proteome	-5.1819	Melanocytes	-0.1
68	111563	PRKAR2B				Not druggable	ENSP00000265717	Proteome	6.18956	PDX_101	-0.1
69	111571	PKN1	DB12010	Fostamatinib	0.00333333333333333	Druggable	ENSP00000242783	Proteome	2.58715	PDX_101	0.142857
70	111740	PTPN3				Not druggable	ENSP00000363667	Proteome	-4.83701	Melanocytes	0.142857
71	111742	PTPN6				Not druggable	ENSP00000326010	Proteome	8.39856	PDX_101	-0.1
72	112054	RPL10				Not druggable	ENSP00000413436	Proteome	2.09356	PDX_101	0.142857
73	112600	SRF				Not druggable	ENSP00000265354	Proteome	2.65832	PDX_101	-0.1
74	112899	TGFB1I1				Not druggable	ENSP00000355117	Proteome	-2.63251	Melanocytes	-0.1
75	112937	TJP1				Not druggable	ENSP00000348416	Proteome	-2.91665	Melanocytes	0.142857
76	113124	TTN				Not druggable	ENSP00000467141	Proteome	7.82058	PDX_101	0.142857
77	113955	HIST1H4A				Not druggable	ENSP00000479106	Proteome	4.01157	FFPE_101	-0.1
78	113996	ULK1	DB12010	Fostamatinib	0.00333333333333333	Druggable	ENSP00000324560	Phospho	-2.95507	Melanocytes	0.142857
79	114449	WASF1				Not druggable	ENSP00000352425	Proteome	-6.71413	Melanocytes	-0.1
80	114483	TAF1B				Not druggable	ENSP00000263663	Proteome	-3.5856	Melanocytes	0.285714
81	114561	NMI				Not druggable	ENSP00000243346	Proteome	2.38569	PDX_101	-0.1
82	114682	PDLIM7				Not druggable	ENSP00000348099	Proteome	-6.21063	Melanocytes	0.142857
83	114689	ITGB1BP1				Not druggable	ENSP00000238091	Proteome	3.90147	PDX_101	-0.1
84	114907	BAG3				Not druggable	ENSP00000358081	Proteome	-2.58754	Melanocytes	0.285714
85	115842	PRPF8				Not druggable	ENSP00000304350	Proteome	-5.39952	Melanocytes	-0.1
86	116206	ATF7	DB00852	Pseudoephedrine	0.0909090909090909	Druggable	ENSP00000399465	Phospho	-3.97307	Melanocytes	-0.1
87	116292	EMILIN1				Not druggable	ENSP00000369677	Proteome	6.73642	FFPE_101	-0.1
88	116354	MAP4K1	DB12010	Fostamatinib	0.00333333333333333	Druggable	ENSP00000380066	Proteome	9.54252	PDX_101	0
89	116655	SPEN				Not druggable	ENSP00000364912	Phospho	-3.74357	Melanocytes	0.428571
90	117146	ZMYND8				Not druggable	ENSP00000312237	Phospho	3.6314	PDX_101	-0.1
91	117654	FBXO6				Not druggable	ENSP00000365944	Proteome	2.93913	PDX_101	0
92	124066	NIFK				Not druggable	ENSP00000285814	Proteome	-2.60124	Melanocytes	-0.1
93	124389	SYTL1				Not druggable	ENSP00000316464	Proteome	3.1832	PDX_101	0
94	128825	ZNRF2				Not druggable	ENSP00000323879	Proteome	6.0521	PDX_101	-0.1
95	106602	ACTN1	DB06773;DB09130	Human calcitonin;Copper	1;0.00680272108843537	Druggable	ENSP00000193403	Phospho	-3.06636	Melanocytes	-0.1
96	107044	B2M	DB00254;DB09130	Doxycycline;Copper	0.25;0.00680272108843537	Druggable	ENSP00000437604	Proteome	2.63926	PDX_101	-0.1
97	107147	BSG				Not druggable	ENSP00000333769	Proteome	-6.74242	Melanocytes	-0.1
98	107293	CASP10				Not druggable	ENSP00000237865	Proteome	3.99973	PDX_101	0
99	107499	CFL1	DB09130	Copper	0.00680272108843537	Druggable	ENSP00000309629	Phospho	4.75841	PDX_101	-0.1
100	107603	CLU	DB01593;DB09130;DB14487;DB14533	Zinc;Copper;Zinc acetate;Zinc chloride	0.00806451612903226;0.00680272108843537;0.00806451612903226;0.00806451612903226	Druggable	ENSP00000315130	Proteome	11.2721	FFPE_101	-0.1
101	108166	DSP	DB01593;DB14487;DB14533	Zinc;Zinc acetate;Zinc chloride	0.00806451612903226;0.00806451612903226;0.00806451612903226	Druggable	ENSP00000369129	Proteome	-8.8093	Melanocytes	0.142857
102	108579	FKBP5				Not druggable	ENSP00000349811	Proteome	-2.10892	Melanocytes	-0.1
103	109072	SFN				Not druggable	ENSP00000340989	Proteome	-8.1217	Melanocytes	-0.1
104	109350	HLA-A	DB11294	Coccidioides immitis spherule	0.333333333333333	Druggable	ENSP00000366005	Proteome	3.10641	PDX_101	0.428571
105	109433	HNRNPU				Not druggable	ENSP00000393151	Phospho	8.10826	PDX_101	-0.1
106	109822	ILF3				Not druggable	ENSP00000250241	Phospho	5.77824	PDX_101	-0.1
107	109913	ITPR1	DB00201;DB09462	Caffeine;Glycerin	0.0909090909090909;0.04	Druggable	ENSP00000306253	Proteome	2.99169	PDX_101	-0.1
108	109931	JUP	DB01593;DB14487;DB14533	Zinc;Zinc acetate;Zinc chloride	0.00806451612903226;0.00806451612903226;0.00806451612903226	Druggable	ENSP00000311113	Proteome	-3.26067	Melanocytes	0.142857
109	110105	LAMA5				Not druggable	ENSP00000252999	Proteome	5.39434	FFPE_101	0.142857
110	110119	STMN1				Not druggable	ENSP00000382633	Proteome	2.94383	PDX_101	-0.1
111	110962	NT5E	DB00806	Pentoxifylline	0.166666666666667	Druggable	ENSP00000257770	Proteome	-4.39648	Melanocytes	0.285714
112	111108	PAWR				Not druggable	ENSP00000328088	Proteome	-5.08759	Melanocytes	-0.1
113	111126	PCBP1				Not druggable	ENSP00000305556	Phospho	6.18876	PDX_101	-0.1
114	111286	SERPINB5				Not druggable	ENSP00000372221	Proteome	-9.43072	Melanocytes	0.285714
115	111332	PKM	DB00119;DB09130	Pyruvic acid;Copper	0.0714285714285714;0.00680272108843537	Druggable	ENSP00000320171	Proteome	3.75643	PDX_101	-0.1
116	111347	PLCB3				Not druggable	ENSP00000443631	Proteome	-2.37124	Melanocytes	0.142857
117	111530	PPT1	DB03796	Palmitic Acid	0.0833333333333333	Druggable	ENSP00000394863	Proteome	-2.32291	Melanocytes	-0.1
118	111587	MAPK9	DB12010	Fostamatinib	0.00333333333333333	Druggable	ENSP00000345524	Proteome	2.3411	PDX_101	-0.1
119	111760	PTPRK				Not druggable	ENSP00000357196	Proteome	-6.01695	Melanocytes	0.142857
120	112042	RPL3	DB04865;DB09092	Omacetaxine mepesuccinate;Xanthinol	0.5;0.166666666666667	Druggable	ENSP00000346001	Proteome	-2.47388	Melanocytes	-0.1
121	112061	RPL18				Not druggable	ENSP00000447001	Proteome	-3.8053	Melanocytes	0.142857
122	112071	RPL24				Not druggable	ENSP00000377640	Proteome	-2.62785	Melanocytes	-0.1
123	113022	TPM2				Not druggable	ENSP00000367541	Proteome	-6.14705	Melanocytes	-0.1
124	113569	ZYX				Not druggable	ENSP00000324422	Proteome	-2.87535	Melanocytes	0
125	114176	CDK13				Not druggable	ENSP00000181839	Phospho	-4.81153	Melanocytes	-0.1
126	114209	IRS2				Not druggable	ENSP00000365016	Proteome	-6.23813	Melanocytes	-0.1
127	114672	UBE2L6				Not druggable	ENSP00000287156	Proteome	3.58998	PDX_101	-0.1
128	114754	SLC9A3R2				Not druggable	ENSP00000408005	Proteome	2.41737	FFPE_101	-0.1
129	115704	IFI30				Not druggable	ENSP00000384886	Proteome	5.01356	PDX_101	0.285714
130	115880	RGS14				Not druggable	ENSP00000386229	Proteome	5.50392	PDX_101	-0.1
131	116022	HSPH1				Not druggable	ENSP00000318687	Proteome	-5.79085	Melanocytes	-0.1
132	116322	CORO1A				Not druggable	ENSP00000219150	Proteome	7.53215	PDX_101	-0.1
133	116819	RRS1				Not druggable	ENSP00000322396	Proteome	-3.14935	Melanocytes	-0.1
134	119099	DEF6				Not druggable	ENSP00000319831	Proteome	3.26888	PDX_101	0.285714
135	119619	LARP7				Not druggable	ENSP00000314311	Phospho	-5.61249	Melanocytes	-0.1
136	119942	TERF2IP				Not druggable	ENSP00000300086	Proteome	1.81309	PDX_101	-0.1
137	119945	SIAE				Not druggable	ENSP00000437877	Proteome	-2.51085	Melanocytes	0
138	121134	PARD3				Not druggable	ENSP00000311986	Proteome	-6.6056	Melanocytes	-0.1
139	122155	MPP5				Not druggable	ENSP00000261681	Proteome	-4.18773	Melanocytes	-0.1
140	123163	CEP290				Not druggable	ENSP00000448012	Proteome	-3.81625	Melanocytes	0
141	124841	ANKRD44				Not druggable	ENSP00000387233	Proteome	3.71686	PDX_101	0.142857
142	125988	HSPB6				Not druggable	ENSP00000004982	Proteome	6.28537	FFPE_101	-0.1
143	129873	SLC25A41				Not druggable	ENSP00000322649	Proteome	3.75733	PDX_101	0.142857
144	107500	CFL2				Not druggable	ENSP00000340635	Phospho	5.99486	PDX_101	-0.1
145	107832	CSK	DB01254;DB12010	Dasatinib;Fostamatinib	0.0434782608695652;0.00333333333333333	Druggable	ENSP00000220003	Proteome	2.46825	PDX_101	-0.1
146	108087	DLST				Not druggable	ENSP00000335304	Proteome	1.70135	PDX_101	-0.1
147	108131	DOK1				Not druggable	ENSP00000233668	Proteome	1.86269	PDX_101	-0.1
148	108350	EPB41L1				Not druggable	ENSP00000337168	Proteome	3.42519	PDX_101	-0.1
149	108486	FBLN1				Not druggable	ENSP00000331544	Proteome	6.59024	FFPE_101	0.285714
150	109049	GNG5				Not druggable	ENSP00000359679	Proteome	4.21704	PDX_101	-0.1
151	109189	GSN	DB01593;DB09130;DB14487;DB14533	Zinc;Copper;Zinc acetate;Zinc chloride	0.00806451612903226;0.00680272108843537;0.00806451612903226;0.00806451612903226	Druggable	ENSP00000377882	Proteome	-3.67596	Melanocytes	-0.1
152	109264	HIST1H1B				Not druggable	ENSP00000330074	Proteome	-2.44553	Melanocytes	-0.1
153	109378	HLA-E				Not druggable	ENSP00000365817	Proteome	2.62655	PDX_101	-0.1
154	109895	ITGB2	DB00641	Simvastatin	0.333333333333333	Druggable	ENSP00000303242	Proteome	3.63095	PDX_101	-0.1
155	110092	KTN1				Not druggable	ENSP00000378722	Proteome	-6.22021	Melanocytes	-0.1
156	110107	LAMB2				Not druggable	ENSP00000307156	Proteome	4.23543	FFPE_101	-0.1
157	110237	BCAM				Not druggable	ENSP00000270233	Proteome	6.30361	FFPE_101	-0.1
158	110368	MECP2				Not druggable	ENSP00000301948	Phospho	-3.79224	Melanocytes	-0.1
159	110916	NOTCH3				Not druggable	ENSP00000263388	Proteome	2.2703	PDX_101	-0.1
160	111352	PLCG2				Not druggable	ENSP00000352336	Proteome	8.87049	PDX_101	0
161	112048	RPL6				Not druggable	ENSP00000202773	Proteome	-2.41818	Melanocytes	-0.1
162	112074	RPL27				Not druggable	ENSP00000253788	Proteome	-2.28284	Melanocytes	-0.1
163	112653	STAT5A				Not druggable	ENSP00000341208	Proteome	3.02465	PDX_101	-0.1
164	112746	TAF12				Not druggable	ENSP00000263974	Proteome	2.57167	PDX_101	-0.1
165	113018	TPD52L2				Not druggable	ENSP00000343554	Proteome	-4.05953	Melanocytes	-0.1
166	113257	VCL				Not druggable	ENSP00000211998	Proteome	-4.4208	Melanocytes	-0.1
167	113295	WIPF1				Not druggable	ENSP00000376330	Proteome	3.05309	PDX_101	0
168	114482	TAF1C				Not druggable	ENSP00000345305	Proteome	-4.70162	Melanocytes	0.142857
169	114654	NOLC1	DB00997	Doxorubicin	0.5	Druggable	ENSP00000385410	Proteome	-2.56441	Melanocytes	0.285714
170	114934	BCAR1				Not druggable	ENSP00000162330	Proteome	-4.26657	Melanocytes	-0.1
171	115604	IKZF1				Not druggable	ENSP00000331614	Proteome	5.75851	PDX_101	-0.1
172	116140	POP1				Not druggable	ENSP00000385787	Proteome	-2.31312	Melanocytes	-0.1
173	116994	TDRD7				Not druggable	ENSP00000347444	Proteome	2.70952	FFPE_101	-0.1
174	117071	SRRM2				Not druggable	ENSP00000301740	Phospho	-6.46169	Melanocytes	0.142857
175	117455	SH2B1				Not druggable	ENSP00000337163	Proteome	-5.32875	Melanocytes	0.285714
176	120482	RIF1				Not druggable	ENSP00000390181	Phospho	3.77049	PDX_101	0.142857
177	116059	PPP1R13L				Not druggable	ENSP00000354218	Proteome	-5.89945	Melanocytes	0.142857
178	116889	ANKS1A				Not druggable	ENSP00000353518	Phospho	5.2086	PDX_101	0.142857
179	110166	LIG1	DB00290	Bleomycin	0.5	Druggable	ENSP00000263274	Phospho	5.25715	PDX_101	-0.1
180	117526	RAI14				Not druggable	ENSP00000265109	Proteome	-3.11618	Melanocytes	0.142857
181	110187	LMNB1				Not druggable	ENSP00000261366	Proteome	1.70133	PDX_101	-0.1
182	127559	AMOTL1				Not druggable	ENSP00000320968	Proteome	-5.97022	Melanocytes	-0.1
183	112183	S100A4	DB00831;DB09130	Trifluoperazine;Copper	0.166666666666667;0.00680272108843537	Druggable	ENSP00000346294	Proteome	5.06882	FFPE_101	-0.1
184	122328	FAM129B				Not druggable	ENSP00000362409	Proteome	-2.31044	Melanocytes	-0.1
185	108463	F13B	DB01593;DB09310;DB11300;DB11571;DB11572;DB14487;DB14533	Zinc;Coagulation Factor XIII A-Subunit (Recombinant);Thrombin;Human Thrombin;Thrombin Alfa;Zinc acetate;Zinc chloride	0.00806451612903226;1;0.1;0.125;0.125;0.00806451612903226;0.00806451612903226	Druggable	ENSP00000356382	Proteome	6.63533	PDX_101	0
186	122005	GPSM3				Not druggable	ENSP00000364180	Proteome	3.26324	PDX_101	-0.1
187	114838	MAP4K4	DB12010	Fostamatinib	0.00333333333333333	Druggable	ENSP00000343658	Proteome	2.4849	PDX_101	-0.1
188	120392	UACA				Not druggable	ENSP00000314556	Proteome	-3.79402	Melanocytes	-0.1
189	111562	PRKAR2A				Not druggable	ENSP00000265563	Phospho	-6.57283	Melanocytes	-0.1
190	111538	PRCP				Not druggable	ENSP00000377055	Proteome	-2.96466	Melanocytes	-0.1
191	112346	SGSH				Not druggable	ENSP00000314606	Proteome	2.8019	FFPE_101	0.142857
192	121155	ERO1LB	DB03147	Flavin adenine dinucleotide	0.0116279069767442	Druggable	ENSP00000346635	Proteome	2.10487	PDX_101	0
193	120437	RBM28				Not druggable	ENSP00000390517	Proteome	-2.56934	Melanocytes	-0.1
194	106967	ATP1A2	DB01092	Ouabain	0.333333333333333	Druggable	ENSP00000354490	Proteome	8.77514	PDX_101	-0.1
195	106719	ALDH2	DB00157;DB00536;DB00822	NADH;Guanidine;Disulfiram	0.00694444444444444;0.142857142857143;0.5	Druggable	ENSP00000261733	Proteome	2.43176	PDX_101	-0.1
196	107787	CRIP2				Not druggable	ENSP00000446875	Proteome	-2.95231	Melanocytes	0.142857
197	110304	MAP1B				Not druggable	ENSP00000296755	Proteome	-4.15618	Melanocytes	0.142857
198	106904	ARSB				Not druggable	ENSP00000264914	Proteome	-5.40689	Melanocytes	0.142857
199	121775	CCAR2				Not druggable	ENSP00000373930	Phospho	-6.15155	Melanocytes	-0.1
200	108064	DHCR24				Not druggable	ENSP00000360316	Proteome	-3.49685	Melanocytes	-0.1

## Sheet: Sheet 2
Interaction network of omics significantly changing entries for patient ID 110
ID	biogrid	label	DrugBank ID	DrugBank name	Specificity	Druggable	CrossDB ID	Omics	Ratio	Samples	Scaled impact score
1	108276	EGFR	DB00002;DB00072;DB00281;DB00317;DB00530;DB01259;DB01269;DB05294;DB08916;DB09330;DB09559;DB10772;DB11828;DB11963;DB12267	Cetuximab;Trastuzumab;Lidocaine;Gefitinib;Erlotinib;Lapatinib;Panitumumab;Vandetanib;Afatinib;Osimertinib;Necitumumab;Foreskin keratinocyte (neonatal);Neratinib;Dacomitinib;Brigatinib	0.0833333333333333;0.0769230769230769;0.142857142857143;1;0.5;0.5;1;0.2;0.333333333333333;1;1;0.0833333333333333;1;1;0.111111111111111	Druggable	ENSP00000342376	Proteome	-4.41769	Melanocytes	-0.1
2	113010	TP53	DB00945;DB01593;DB14487;DB14533	Acetylsalicylic acid;Zinc;Zinc acetate;Zinc chloride	0.0909090909090909;0.00806451612903226;0.00806451612903226;0.00806451612903226	Druggable	ENSP00000269305	Proteome	-3.64429	Melanocytes	0.285714
3	114397	SQSTM1				Not druggable	ENSP00000374455	Phospho	3.09817	PDX_110	-0.1
4	107800	CRYAB				Not druggable	ENSP00000227251	Proteome	3.31895	PDX_110	-0.1
5	107140	BRCA1				Not druggable	ENSP00000350283	Phospho	-6.46784	Melanocytes	0.571429
6	107427	CDC20				Not druggable	ENSP00000308450	Proteome	-3.99622	Melanocytes	-0.1
7	117406	RCHY1				Not druggable	ENSP00000321239	Proteome	4.58924	PDX_110	-0.1
8	123565	MAP1LC3B				Not druggable	ENSP00000268607	Proteome	-2.51567	Melanocytes	-0.1
9	113500	TRIM25				Not druggable	ENSP00000323889	Proteome	-6.19939	Melanocytes	0
10	110443	KMT2A				Not druggable	ENSP00000374157	Phospho	4.91851	PDX_110	-0.1
11	111384	PML	DB01169	Arsenic trioxide	0.1	Druggable	ENSP00000268058	Phospho	-6.08497	Melanocytes	0.285714
12	107331	CCNA2				Not druggable	ENSP00000274026	Proteome	-5.0944	Melanocytes	0.142857
13	108578	FKBP4				Not druggable	ENSP00000001008	Proteome	-2.25096	Melanocytes	0
14	108579	FKBP5				Not druggable	ENSP00000349811	Proteome	-2.37384	Melanocytes	-0.1
15	112666	AURKA				Not druggable	ENSP00000216911	Proteome	-4.07359	Melanocytes	0.285714
16	114554	USP10				Not druggable	ENSP00000219473	Proteome	-1.91076	Melanocytes	0
17	115684	YAP1				Not druggable	ENSP00000331023	Proteome	-2.64935	Melanocytes	-0.1
18	109659	IFIT1				Not druggable	ENSP00000441968	Proteome	6.69369	PDX_110	-0.1
19	110730	MYO6				Not druggable	ENSP00000358992	Proteome	-7.60127	Melanocytes	-0.1
20	114356	NRP1	DB00039;DB04895	Palifermin;Pegaptanib	0.166666666666667;1	Druggable	ENSP00000363954	Proteome	-3.22383	Melanocytes	0.142857
21	108773	FTH1	DB00893;DB01592;DB13995;DB14488;DB14489;DB14490;DB14491;DB14501	Iron Dextran;Iron;Ferric pyrophosphate citrate;Ferrous gluconate;Ferrous succinate;Ferrous ascorbate;Ferrous fumarate;Ferrous glycine sulfate	0.25;0.0769230769230769;0.25;0.0769230769230769;0.0769230769230769;0.0769230769230769;0.0769230769230769;0.0769230769230769	Druggable	ENSP00000273550	Proteome	3.54478	FFPE_110	-0.1
22	108789	FTL	DB00893;DB09517;DB13995	Iron Dextran;Sodium ferric gluconate complex;Ferric pyrophosphate citrate	0.25;0.333333333333333;0.25	Druggable	ENSP00000366525	Proteome	6.22497	FFPE_110	-0.1
23	110186	LMNA				Not druggable	ENSP00000292304	Phospho	5.94805	PDX_110	-0.1
24	111715	PTGS2	DB00159;DB00210;DB00233;DB00244;DB00316;DB00328;DB00461;DB00465;DB00469;DB00480;DB00482;DB00500;DB00533;DB00554;DB00573;DB00580;DB00586;DB00605;DB00712;DB00749;DB00784;DB00788;DB00795;DB00812;DB00814;DB00821;DB00861;DB00870;DB00936;DB00939;DB00945;DB00963;DB00991;DB01009;DB01014;DB01041;DB01050;DB01283;DB01397;DB01399;DB01401;DB01404;DB01419;DB01435;DB01600;DB01628;DB02266;DB02709;DB04743;DB06725…	Icosapent;Adapalene;Aminosalicylic Acid;Mesalazine;Acetaminophen;Indometacin;Nabumetone;Ketorolac;Tenoxicam;Lenalidomide;Celecoxib;Tolmetin;Rofecoxib;Piroxicam;Fenoprofen;Valdecoxib;Diclofenac;Sulindac;Flurbiprofen;Etodolac;Mefenamic acid;Naproxen;Sulfasalazine;Phenylbutazone;Meloxicam;Carprofen;Diflunisal;Suprofen;Salicylic acid;Meclofenamic acid;Acetylsalicylic acid;Bromfenac;Oxaprozin;Ketoprof…	0.0909090909090909;0.142857142857143;0.2;0.125;0.2;0.111111111111111;0.5;0.5;0.5;0.25;0.142857142857143;0.5;0.5;0.5;0.25;0.333333333333333;0.125;0.142857142857143;0.5;0.333333333333333;0.5;0.333333333333333;0.1;0.333333333333333;0.5;0.5;0.5;0.5;0.333333333333333;0.2;0.0909090909090909;0.5;0.5;0.333333333333333;0.25;0.166666666666667;0.1;0.5;0.5;0.5;0.5;0.333333333333333;0.5;0.5;0.5;1;0.1666666666…	Druggable	ENSP00000356438	Proteome	3.07308	PDX_110	-0.1
25	115448	G3BP1				Not druggable	ENSP00000348578	Phospho	-7.33529	Melanocytes	-0.1
26	107164	BUB1				Not druggable	ENSP00000302530	Proteome	-5.35483	Melanocytes	-0.1
27	108325	EMD				Not druggable	ENSP00000358857	Phospho	-7.01495	Melanocytes	-0.1
28	109552	HSP90AA1	DB00615;DB00716;DB09130	Rifabutin;Nedocromil;Copper	0.2;0.2;0.00680272108843537	Druggable	ENSP00000216281	Phospho	-6.81473	Melanocytes	-0.1
29	112481	SMARCA4				Not druggable	ENSP00000343896	Phospho	5.55243	PDX_110	0.285714
30	113272	VIM				Not druggable	ENSP00000446007	Phospho	8.74071	PDX_110	-0.1
31	115332	PDCD6IP				Not druggable	ENSP00000307387	Proteome	-4.07025	Melanocytes	0.285714
32	117660	TINF2				Not druggable	ENSP00000267415	Proteome	-3.58306	Melanocytes	-0.1
33	118141	TNRC6A				Not druggable	ENSP00000326900	Proteome	-4.95225	Melanocytes	0.285714
34	120465	CEP55				Not druggable	ENSP00000360540	Proteome	-4.03497	Melanocytes	0.142857
35	106586	ACTG1	DB09130	Copper	0.00680272108843537	Druggable	ENSP00000458435	Phospho	7.52244	PDX_110	-0.1
36	108638	FOSL2				Not druggable	ENSP00000264716	Proteome	-3.90452	Melanocytes	-0.1
37	109261	HIST1H1C				Not druggable	ENSP00000339566	Phospho	-5.22145	Melanocytes	-0.1
38	109913	ITPR1	DB00201;DB09462	Caffeine;Glycerin	0.0909090909090909;0.04	Druggable	ENSP00000306253	Proteome	2.16098	PDX_110	-0.1
39	109928	JUN	DB00570;DB00852;DB01029;DB01169	Vinblastine;Pseudoephedrine;Irbesartan;Arsenic trioxide	0.166666666666667;0.0909090909090909;0.5;0.1	Druggable	ENSP00000360266	Proteome	-2.89023	Melanocytes	-0.1
40	110826	NEK2				Not druggable	ENSP00000355965	Proteome	-3.76416	Melanocytes	0.142857
41	111271	PHF1				Not druggable	ENSP00000363636	Proteome	2.79996	PDX_110	-0.1
42	111566	PRKCD	DB00675;DB05013	Tamoxifen;Ingenol Mebutate	0.111111111111111;0.5	Druggable	ENSP00000331602	Proteome	2.50724	PDX_110	-0.1
43	111581	MAPK3	DB00605;DB01169;DB08862	Sulindac;Arsenic trioxide;Cholecystokinin	0.142857142857143;0.1;0.166666666666667	Druggable	ENSP00000263025	Phospho	-4.95559	Melanocytes	-0.1
44	111591	MAP2K2	DB06616;DB08911;DB11967	Bosutinib;Trametinib;Binimetinib	0.1;0.5;0.2	Druggable	ENSP00000262948	Phospho	7.22454	PDX_110	0.285714
45	111748	PTPN14				Not druggable	ENSP00000355923	Phospho	3.04549	PDX_110	-0.1
46	111860	RB1	DB00030;DB00071	Insulin Human;Insulin Pork	0.0833333333333333;0.0714285714285714	Druggable	ENSP00000267163	Phospho	-6.01154	Melanocytes	0.142857
47	112179	S100A1	DB00768	Olopatadine	0.166666666666667	Druggable	ENSP00000292169	Proteome	9.23643	PDX_110	-0.1
48	113265	VEGFA	DB00112;DB01017;DB01120;DB01136;DB01270;DB03088;DB03754;DB05294;DB06779;DB08885;DB09301;DB10772	Bevacizumab;Minocycline;Gliclazide;Carvedilol;Ranibizumab;Pidolic Acid;Tromethamine;Vandetanib;Dalteparin;Aflibercept;Chondroitin sulfate;Foreskin keratinocyte (neonatal)	0.0909090909090909;0.111111111111111;0.5;0.0588235294117647;1;0.0588235294117647;0.0769230769230769;0.2;0.25;0.333333333333333;0.25;0.0833333333333333	Druggable	ENSP00000361137	Proteome	3.40301	PDX_110	-0.1
49	114113	LMO4				Not druggable	ENSP00000359575	Proteome	3.01866	PDX_110	-0.1
50	114572	PDLIM1				Not druggable	ENSP00000360305	Proteome	-5.48735	Melanocytes	0.142857
51	115544	SRRM1				Not druggable	ENSP00000326261	Phospho	-8.54028	Melanocytes	-0.1
52	118876	PYCARD				Not druggable	ENSP00000340441	Proteome	-3.05807	Melanocytes	-0.1
53	118913	NCAPH2				Not druggable	ENSP00000299821	Proteome	-6.10948	Melanocytes	0.285714
54	119488	ZBTB7A				Not druggable	ENSP00000323670	Proteome	-4.54261	Melanocytes	-0.1
55	119942	TERF2IP				Not druggable	ENSP00000300086	Proteome	-4.38301	Melanocytes	-0.1
56	121529	GATAD2B				Not druggable	ENSP00000357644	Phospho	-6.87014	Melanocytes	-0.1
57	106524	A2M	DB00102;DB00515;DB00626;DB01593;DB08888;DB12965;DB14487;DB14533	Becaplermin;Cisplatin;Bacitracin;Zinc;Ocriplasmin;Silver;Zinc acetate;Zinc chloride	0.333333333333333;0.25;0.5;0.00806451612903226;0.333333333333333;0.25;0.00806451612903226;0.00806451612903226	Druggable	ENSP00000323929	Proteome	5.3935	FFPE_110	0.142857
58	106902	ARRB2				Not druggable	ENSP00000269260	Proteome	3.07055	PDX_110	-0.1
59	107309	RUNX1				Not druggable	ENSP00000340690	Proteome	-3.57	Melanocytes	-0.1
60	107398	CD44	DB08818	Hyaluronic acid	0.0666666666666667	Druggable	ENSP00000263398	Proteome	-2.04692	Melanocytes	-0.1
61	107607	CLK2				Not druggable	ENSP00000347759	Proteome	3.89719	FFPE_110	-0.1
62	107788	CRK				Not druggable	ENSP00000300574	Phospho	-5.0638	Melanocytes	-0.1
63	108414	ETS1				Not druggable	ENSP00000376436	Phospho	-5.13792	Melanocytes	0.142857
64	108607	FLNC				Not druggable	ENSP00000327145	Proteome	-6.04828	Melanocytes	0.428571
65	108991	GCLC	DB00142;DB00151	Glutamic Acid;L-Cysteine	0.0142857142857143;0.0769230769230769	Druggable	ENSP00000482756	Proteome	-2.54503	Melanocytes	-0.1
66	109420	HNRNPA1				Not druggable	ENSP00000341826	Proteome	-1.73303	Melanocytes	-0.1
67	109433	HNRNPU				Not druggable	ENSP00000393151	Phospho	7.27524	PDX_110	-0.1
68	109610	ICAM1	DB00108;DB08818	Natalizumab;Hyaluronic acid	0.0833333333333333;0.0666666666666667	Druggable	ENSP00000264832	Proteome	3.24938	PDX_110	0.285714
69	110445	AFF1				Not druggable	ENSP00000305689	Proteome	-3.84	Melanocytes	0.571429
70	110447	MLLT4				Not druggable	ENSP00000341118	Proteome	-4.63829	Melanocytes	-0.1
71	110816	NEDD9				Not druggable	ENSP00000368759	Proteome	3.29489	PDX_110	-0.1
72	111092	SERPINB2	DB00013;DB00031	Urokinase;Tenecteplase	0.1;0.0909090909090909	Druggable	ENSP00000299502	Proteome	-6.67661	Melanocytes	-0.1
73	111742	PTPN6				Not druggable	ENSP00000326010	Proteome	4.41408	FFPE_110	-0.1
74	112189	S100A10				Not druggable	ENSP00000357801	Proteome	-7.996	Melanocytes	-0.1
75	112610	SRPK1				Not druggable	ENSP00000362931	Proteome	-2.69223	Melanocytes	-0.1
76	113003	TOP1	DB00762;DB01030;DB05630;DB11254	Irinotecan;Topotecan;Sodium stibogluconate;Hexylresorcinol	0.5;0.5;1;0.333333333333333	Druggable	ENSP00000354522	Phospho	-4.60898	Melanocytes	-0.1
77	113123	TTK				Not druggable	ENSP00000230510	Proteome	-7.23805	Melanocytes	0.285714
78	113271	EZR				Not druggable	ENSP00000338934	Proteome	-2.05237	Melanocytes	-0.1
79	114029	CUL4A				Not druggable	ENSP00000322132	Proteome	-6.37779	Melanocytes	-0.1
80	114691	BCL7C				Not druggable	ENSP00000369674	Proteome	3.71653	PDX_110	-0.1
81	114769	SLC9A3R1				Not druggable	ENSP00000262613	Proteome	-2.80593	Melanocytes	-0.1
82	114873	KIF23				Not druggable	ENSP00000260363	Proteome	-3.51181	Melanocytes	-0.1
83	116059	PPP1R13L				Not druggable	ENSP00000354218	Phospho	-5.32499	Melanocytes	0.142857
84	116220	RBPMS				Not druggable	ENSP00000287771	Proteome	-4.42681	Melanocytes	-0.1
85	116624	TPX2				Not druggable	ENSP00000300403	Proteome	-3.11567	Melanocytes	-0.1
86	116677	WDTC1				Not druggable	ENSP00000317971	Proteome	-4.48892	Melanocytes	-0.1
87	117140	CD2AP				Not druggable	ENSP00000352264	Proteome	-1.96223	Melanocytes	-0.1
88	117586	NOC2L				Not druggable	ENSP00000317992	Proteome	2.29637	PDX_110	0.142857
89	120931	PAG1				Not druggable	ENSP00000220597	Proteome	-5.44618	Melanocytes	-0.1
90	121775	CCAR2				Not druggable	ENSP00000373930	Phospho	-6.82343	Melanocytes	-0.1
91	123196	C17orf70				Not druggable	ENSP00000333283	Proteome	-4.07084	Melanocytes	0.285714
92	123838	CCDC8				Not druggable	ENSP00000303158	Proteome	3.78394	PDX_110	0.285714
93	106602	ACTN1	DB06773;DB09130	Human calcitonin;Copper	1;0.00680272108843537	Druggable	ENSP00000193403	Proteome	-2.60337	Melanocytes	0
94	106845	APOE	DB01593;DB09130;DB14487;DB14533	Zinc;Copper;Zinc acetate;Zinc chloride	0.00806451612903226;0.00680272108843537;0.00806451612903226;0.00806451612903226	Druggable	ENSP00000252486	Proteome	-2.33425	Melanocytes	-0.1
95	107036	AXL	DB12141	Gilteritinib	0.25	Druggable	ENSP00000301178	Proteome	-2.92012	Melanocytes	-0.1
96	107284	CASP1	DB01017	Minocycline	0.111111111111111	Druggable	ENSP00000344132	Proteome	-4.06689	Melanocytes	0.285714
97	108166	DSP	DB01593;DB14487;DB14533	Zinc;Zinc acetate;Zinc chloride	0.00806451612903226;0.00806451612903226;0.00806451612903226	Druggable	ENSP00000369129	Proteome	-10.5367	Melanocytes	-0.1
98	108185	DUSP9				Not druggable	ENSP00000345853	Proteome	2.43195	PDX_110	-0.1
99	108482	FANCB				Not druggable	ENSP00000326819	Proteome	-3.6143	Melanocytes	-0.1
100	109072	SFN				Not druggable	ENSP00000340989	Proteome	-11.8859	Melanocytes	-0.1
101	109660	IFIT3				Not druggable	ENSP00000360876	Proteome	2.46167	PDX_110	-0.1
102	109896	ITGB3	DB00054;DB00063;DB00098;DB00775;DB02709	Abciximab;Eptifibatide;Antithymocyte immunoglobulin (rabbit);Tirofiban;Resveratrol	0.0714285714285714;1;0.111111111111111;0.5;0.04	Druggable	ENSP00000452786	Proteome	3.20932	PDX_110	-0.1
103	109931	JUP	DB01593;DB14487;DB14533	Zinc;Zinc acetate;Zinc chloride	0.00806451612903226;0.00806451612903226;0.00806451612903226	Druggable	ENSP00000311113	Proteome	-4.23724	Melanocytes	0.142857
104	110187	LMNB1				Not druggable	ENSP00000261366	Phospho	6.06563	PDX_110	-0.1
105	111108	PAWR				Not druggable	ENSP00000328088	Proteome	-6.32573	Melanocytes	-0.1
106	111338	PLA2G4A	DB00588	Fluticasone propionate	0.25	Druggable	ENSP00000356436	Proteome	2.15601	PDX_110	0.142857
107	111345	PLAUR	DB00009;DB00013;DB00015;DB00029;DB00031	Alteplase;Urokinase;Reteplase;Anistreplase;Tenecteplase	0.25;0.1;0.25;0.25;0.0909090909090909	Druggable	ENSP00000221264	Proteome	-3.02746	Melanocytes	-0.1
108	111567	PRKCE	DB00675	Tamoxifen	0.111111111111111	Druggable	ENSP00000306124	Proteome	4.39834	PDX_110	-0.1
109	111759	PTPRJ				Not druggable	ENSP00000409733	Proteome	3.72584	PDX_110	-0.1
110	111760	PTPRK				Not druggable	ENSP00000357196	Proteome	-9.12963	Melanocytes	-0.1
111	112183	S100A4	DB00831;DB09130	Trifluoperazine;Copper	0.166666666666667;0.00680272108843537	Druggable	ENSP00000346294	Proteome	9.55697	PDX_110	-0.1
112	112188	S100A9	DB01373;DB01593;DB14487;DB14533	Calcium;Zinc;Zinc acetate;Zinc chloride	0.05;0.00806451612903226;0.00806451612903226;0.00806451612903226	Druggable	ENSP00000357727	Proteome	8.07876	FFPE_110	-0.1
113	112654	STAT5B	DB01254	Dasatinib	0.0434782608695652	Druggable	ENSP00000293328	Proteome	3.02992	FFPE_110	-0.1
114	112917	THBS3				Not druggable	ENSP00000357362	Proteome	3.13892	PDX_110	-0.1
115	113146	TXN				Not druggable	ENSP00000363641	Proteome	-2.66333	Melanocytes	-0.1
116	113253	VAV2				Not druggable	ENSP00000360916	Proteome	-2.8624	Melanocytes	-0.1
117	113575	PRDM2				Not druggable	ENSP00000235372	Proteome	3.45664	PDX_110	0.142857
118	113902	PICALM				Not druggable	ENSP00000433846	Phospho	4.63283	PDX_110	-0.1
119	114290	ADAM9				Not druggable	ENSP00000419446	Proteome	-6.18665	Melanocytes	-0.1
120	114417	CCNA1				Not druggable	ENSP00000255465	Proteome	-5.0944	Melanocytes	-0.1
121	114652	MTA2				Not druggable	ENSP00000278823	Phospho	-6.0423	Melanocytes	-0.1
122	114802	ZRANB2				Not druggable	ENSP00000254821	Proteome	3.51736	PDX_110	0.142857
123	115038	CLINT1				Not druggable	ENSP00000388340	Phospho	-6.5621	Melanocytes	-0.1
124	115118	BCLAF1				Not druggable	ENSP00000229446	Phospho	-6.77024	Melanocytes	0.428571
125	115704	IFI30				Not druggable	ENSP00000384886	Proteome	4.80302	FFPE_110	0.285714
126	115783	NOP56				Not druggable	ENSP00000370589	Proteome	-6.2338	Melanocytes	-0.1
127	116357	PKP3				Not druggable	ENSP00000331678	Proteome	-2.94225	Melanocytes	-0.1
128	116660	CNOT1				Not druggable	ENSP00000320949	Proteome	-6.90594	Melanocytes	-0.1
129	116843	PHLPP1				Not druggable	ENSP00000262719	Proteome	-3.69302	Melanocytes	-0.1
130	118042	NAAA				Not druggable	ENSP00000286733	Proteome	3.58164	FFPE_110	0.285714
131	118892	RACGAP1				Not druggable	ENSP00000309871	Proteome	-2.63005	Melanocytes	-0.1
132	120490	PBRM1				Not druggable	ENSP00000349213	Phospho	-5.90473	Melanocytes	-0.1
133	121384	GOPC				Not druggable	ENSP00000052569	Proteome	-4.43112	Melanocytes	-0.1
134	123924	ANTXR1				Not druggable	ENSP00000301945	Proteome	-5.76956	Melanocytes	0.428571
135	124393	AJUBA				Not druggable	ENSP00000262713	Proteome	-6.23515	Melanocytes	0.142857
136	127357	SGOL2				Not druggable	ENSP00000350447	Proteome	-3.37233	Melanocytes	-0.1
137	131483	TUBB2B				Not druggable	ENSP00000259818	Proteome	2.82334	PDX_110	0.142857
138	106614	ADA	DB00552;DB00975	Pentostatin;Dipyridamole	1;0.166666666666667	Druggable	ENSP00000361965	Proteome	-2.52967	Melanocytes	-0.1
139	106672	AP2B1				Not druggable	ENSP00000478471	Proteome	-4.1838	Melanocytes	-0.1
140	106683	AGA				Not druggable	ENSP00000264595	Proteome	3.86655	FFPE_110	0.142857
141	106819	APBB1				Not druggable	ENSP00000311912	Proteome	-4.16614	Melanocytes	-0.1
142	107306	CAV2				Not druggable	ENSP00000222693	Proteome	-3.88869	Melanocytes	0
143	107674	COL1A1	DB00048;DB11338;DB12872;DB13133	Collagenase clostridium histolyticum;Clove oil;Vonicog Alfa;Von Willebrand Factor Human	0.25;0.25;0.5;0.5	Druggable	ENSP00000225964	Proteome	-4.57287	Melanocytes	0.142857
144	107881	CTNND1				Not druggable	ENSP00000351527	Phospho	-5.28248	Melanocytes	-0.1
145	108131	DOK1				Not druggable	ENSP00000233668	Proteome	3.07093	PDX_110	-0.1
146	108163	DSG2				Not druggable	ENSP00000261590	Proteome	-4.30811	Melanocytes	-0.1
147	108226	LPAR1				Not druggable	ENSP00000351755	Proteome	2.35561	PDX_110	-0.1
148	108332	CTTN				Not druggable	ENSP00000301843	Phospho	-9.91626	Melanocytes	-0.1
149	108486	FBLN1				Not druggable	ENSP00000262722	Proteome	2.79058	PDX_110	0.285714
150	108992	GCLM	DB00142;DB00151	Glutamic Acid;L-Cysteine	0.0142857142857143;0.0769230769230769	Druggable	ENSP00000484507	Proteome	-3.04706	Melanocytes	-0.1
151	109895	ITGB2	DB00641	Simvastatin	0.333333333333333	Druggable	ENSP00000303242	Proteome	4.32523	FFPE_110	-0.1
152	110036	KPNA2				Not druggable	ENSP00000332455	Proteome	-2.29738	Melanocytes	0.142857
153	112342	SGCD				Not druggable	ENSP00000403003	Proteome	4.83181	PDX_110	-0.1
154	112411	SLC3A2				Not druggable	ENSP00000340815	Proteome	-2.12778	Melanocytes	-0.1
155	112627	SSRP1				Not druggable	ENSP00000278412	Phospho	4.47043	PDX_110	-0.1
156	112809	TCOF1				Not druggable	ENSP00000325223	Proteome	-6.23291	Melanocytes	0
157	113008	TOP2B	DB00380;DB00694;DB00773;DB00970	Dexrazoxane;Daunorubicin;Etoposide;Dactinomycin	0.5;0.5;0.5;1	Druggable	ENSP00000264331	Phospho	-8.0821	Melanocytes	-0.1
158	113934	HIST2H2AC				Not druggable	ENSP00000332194	Proteome	2.98124	FFPE_110	-0.1
159	114024	DUSP11				Not druggable	ENSP00000272444	Proteome	-4.35662	Melanocytes	-0.1
160	114384	LDB1				Not druggable	ENSP00000354616	Proteome	-3.40157	Melanocytes	-0.1
161	114625	DDX21				Not druggable	ENSP00000346120	Proteome	-4.60199	Melanocytes	-0.1
162	115193	CEP170				Not druggable	ENSP00000355500	Phospho	-8.58198	Melanocytes	0.142857
163	115292	THRAP3				Not druggable	ENSP00000346634	Proteome	-3.98348	Melanocytes	0.142857
164	115354	TOM1				Not druggable	ENSP00000394466	Proteome	-2.21494	Melanocytes	-0.1
165	115362	SMC4				Not druggable	ENSP00000341382	Proteome	-6.18864	Melanocytes	-0.1
166	115723	TACC3				Not druggable	ENSP00000326550	Proteome	-2.73515	Melanocytes	0.428571
167	116524	LMTK2				Not druggable	ENSP00000297293	Proteome	-3.85637	Melanocytes	0.142857
168	116662	PALLD				Not druggable	ENSP00000261509	Proteome	-2.13697	Melanocytes	0.142857
169	116889	ANKS1A				Not druggable	ENSP00000353518	Phospho	4.36653	PDX_110	0.142857
170	116978	DICER1				Not druggable	ENSP00000343745	Proteome	-3.81074	Melanocytes	0.142857
171	117071	SRRM2				Not druggable	ENSP00000301740	Phospho	-7.35777	Melanocytes	0.142857
172	118845	SETD2				Not druggable	ENSP00000386759	Phospho	4.62486	PDX_110	0.285714
173	119535	SNX9				Not druggable	ENSP00000376024	Proteome	-2.33584	Melanocytes	-0.1
174	119986	DGCR8				Not druggable	ENSP00000263209	Proteome	-4.97321	Melanocytes	-0.1
175	122494	AHNAK				Not druggable	ENSP00000367263	Proteome	-10.4017	Melanocytes	0.142857
176	128670	HNRNPA3				Not druggable	ENSP00000408487	Proteome	3.43631	PDX_110	-0.1
177	108824	GAB1				Not druggable	ENSP00000262995	Phospho	4.16605	PDX_110	-0.1
178	110325	MBP				Not druggable	ENSP00000348273	Proteome	2.53592	PDX_110	0.285714
179	127559	AMOTL1				Not druggable	ENSP00000320968	Phospho	-5.2799	Melanocytes	-0.1
180	120759	STAP2				Not druggable	ENSP00000468927	Proteome	-5.01578	Melanocytes	0.142857
181	122272	TNS3				Not druggable	ENSP00000312143	Phospho	2.79493	PDX_110	-0.1
182	110193	LMO7				Not druggable	ENSP00000317802	Phospho	5.8425	PDX_110	0.428571
183	128104	ASXL1				Not druggable	ENSP00000364839	Proteome	-4.30675	Melanocytes	-0.1
184	128685	HNRNPUL2				Not druggable	ENSP00000301785	Phospho	4.87242	PDX_110	0
185	108363	EPHB3				Not druggable	ENSP00000332118	Proteome	6.21686	PDX_110	0
186	116022	HSPH1				Not druggable	ENSP00000318687	Proteome	-4.0574	Melanocytes	-0.1
187	110304	MAP1B				Not druggable	ENSP00000296755	Phospho	-4.93494	Melanocytes	0.142857
188	106587	ACTG2				Not druggable	ENSP00000295137	Phospho	7.52244	PDX_110	-0.1
189	106617	ADAR				Not druggable	ENSP00000357456	Phospho	7.87257	PDX_110	0
190	117587	RSL1D1				Not druggable	ENSP00000460871	Proteome	-6.29115	Melanocytes	-0.1
191	110982	NUP98				Not druggable	ENSP00000316032	Proteome	-6.34624	Melanocytes	-0.1
192	110107	LAMB2				Not druggable	ENSP00000307156	Proteome	2.44604	PDX_110	0
193	113596	PXDN				Not druggable	ENSP00000252804	Proteome	-4.00057	Melanocytes	-0.1
194	115654	TUBB3	DB04845	Ixabepilone	1	Druggable	ENSP00000320295	Proteome	-5.92007	Melanocytes	-0.1
195	122815	MANEA				Not druggable	ENSP00000351669	Proteome	-3.64011	Melanocytes	0.142857
196	128001	FUT11				Not druggable	ENSP00000361932	Proteome	2.4187	PDX_110	-0.1
197	106573	ACTA1	DB02772	Sucrose	0.0555555555555556	Druggable	ENSP00000355645	Phospho	7.52244	PDX_110	-0.1
198	113311	WNT5A				Not druggable	ENSP00000264634	Proteome	-7.74819	Melanocytes	0.285714
199	131462	TUBB8				Not druggable	ENSP00000457062	Proteome	5.96837	PDX_110	0.285714
200	108388	ERF				Not druggable	ENSP00000222329	Proteome	-3.42608	Melanocytes	-0.1

## Sheet: Sheet 3
Interaction network of omics significantly changing entries for patient ID 111
ID	biogrid	label	DrugBank ID	DrugBank name	Specificity	Druggable	CrossDB ID	Omics	Ratio	Samples	Scaled impact score
1	107452	CDK2	DB06616	Bosutinib	0.1	Druggable	ENSP00000266970	Proteome	3.46029	PDX_111	-0.1
2	108276	EGFR	DB00002;DB00072;DB00281;DB00317;DB00530;DB01259;DB01269;DB05294;DB08916;DB09330;DB09559;DB10772;DB11828;DB11963;DB12010;DB12267	Cetuximab;Trastuzumab;Lidocaine;Gefitinib;Erlotinib;Lapatinib;Panitumumab;Vandetanib;Afatinib;Osimertinib;Necitumumab;Foreskin keratinocyte (neonatal);Neratinib;Dacomitinib;Fostamatinib;Brigatinib	0.0833333333333333;0.0769230769230769;0.142857142857143;1;0.5;0.5;1;0.2;0.333333333333333;1;1;0.0833333333333333;1;1;0.00333333333333333;0.111111111111111	Druggable	ENSP00000342376	Proteome	-2.94122	Melanocytes	0.285714
3	114397	SQSTM1				Not druggable	ENSP00000374455	Phospho	5.29634	PDX_111	-0.1
4	107460	CDKN1A	DB01169	Arsenic trioxide	0.1	Druggable	ENSP00000244741	Proteome	-5.5116	Melanocytes	-0.1
5	107800	CRYAB				Not druggable	ENSP00000227251	Proteome	3.27674	PDX_111	-0.1
6	107331	CCNA2				Not druggable	ENSP00000274026	Proteome	-2.92596	Melanocytes	0.142857
7	115156	KEAP1	DB08908	Dimethyl fumarate	0.5	Druggable	ENSP00000171111	Proteome	-3.3007	Melanocytes	-0.1
8	118893	UHRF1				Not druggable	ENSP00000485604	Proteome	-2.81112	Melanocytes	-0.1
9	107067	CCND1	DB01169;DB11718	Arsenic trioxide;Encorafenib	0.1;0.5	Druggable	ENSP00000227507	Proteome	-5.74408	Melanocytes	-0.1
10	108123	DNMT1	DB00928;DB01035;DB01099;DB01262	Azacitidine;Procainamide;Flucytosine;Decitabine	1;0.333333333333333;0.5;1	Druggable	ENSP00000345739	Proteome	-6.04137	Melanocytes	-0.1
11	114417	CCNA1				Not druggable	ENSP00000255465	Proteome	-2.92596	Melanocytes	-0.1
12	111831	RAF1	DB00398;DB08862;DB08896;DB08912;DB12010	Sorafenib;Cholecystokinin;Regorafenib;Dabrafenib;Fostamatinib	0.1;0.166666666666667;0.0555555555555556;0.2;0.00333333333333333	Druggable	ENSP00000251849	Proteome	2.92387	PDX_111	-0.1
13	119296	APH1A				Not druggable	ENSP00000353380	Proteome	3.59832	PDX_111	-0.1
14	111362	PLK1	DB12010	Fostamatinib	0.00333333333333333	Druggable	ENSP00000300093	Proteome	-2.64702	Melanocytes	-0.1
15	115333	PDCD6	DB01373;DB01593;DB11093;DB11348;DB14481;DB14487;DB14533	Calcium;Zinc;Calcium Citrate;Calcium Phosphate;Calcium phosphate dihydrate;Zinc acetate;Zinc chloride	0.05;0.00806451612903226;0.0303030303030303;0.0303030303030303;0.0303030303030303;0.00806451612903226;0.00806451612903226	Druggable	ENSP00000264933	Proteome	2.81881	FFPE_111	-0.1
16	109552	HSP90AA1	DB00615;DB00716;DB09130	Rifabutin;Nedocromil;Copper	0.2;0.2;0.00680272108843537	Druggable	ENSP00000216281	Phospho	-7.77846	Melanocytes	-0.1
17	111493	PPP1CA				Not druggable	ENSP00000326031	Proteome	-3.06986	Melanocytes	-0.1
18	112872	TERF1				Not druggable	ENSP00000276602	Phospho	3.99644	PDX_111	-0.1
19	113102	TSG101				Not druggable	ENSP00000251968	Proteome	-1.8158	Melanocytes	-0.1
20	117656	FBXO4				Not druggable	ENSP00000281623	Proteome	2.84831	PDX_111	-0.1
21	107434	CDH1				Not druggable	ENSP00000261769	Proteome	6.84188	PDX_111	-0.1
22	108773	FTH1	DB00893;DB01592;DB13995;DB14488;DB14489;DB14490;DB14491;DB14501	Iron Dextran;Iron;Ferric pyrophosphate citrate;Ferrous gluconate;Ferrous succinate;Ferrous ascorbate;Ferrous fumarate;Ferrous glycine sulfate	0.25;0.0769230769230769;0.25;0.0769230769230769;0.0769230769230769;0.0769230769230769;0.0769230769230769;0.0769230769230769	Druggable	ENSP00000273550	Proteome	3.64969	FFPE_111	-0.1
23	108789	FTL	DB00893;DB09517;DB13995	Iron Dextran;Sodium ferric gluconate complex;Ferric pyrophosphate citrate	0.25;0.333333333333333;0.25	Druggable	ENSP00000366525	Proteome	8.45746	FFPE_111	-0.1
24	111576	PRKCZ	DB00675	Tamoxifen	0.111111111111111	Druggable	ENSP00000367830	Proteome	-6.40634	Melanocytes	-0.1
25	116961	NCSTN				Not druggable	ENSP00000294785	Proteome	2.79355	PDX_111	-0.1
26	107166	BUB1B				Not druggable	ENSP00000287598	Proteome	-3.85627	Melanocytes	-0.1
27	108621	FN1	DB01593;DB08888;DB14487;DB14533	Zinc;Ocriplasmin;Zinc acetate;Zinc chloride	0.00806451612903226;0.333333333333333;0.00806451612903226;0.00806451612903226	Druggable	ENSP00000338200	Proteome	-1.76661	Melanocytes	0.428571
28	111642	PSEN1				Not druggable	ENSP00000326366	Phospho	-4.78862	Melanocytes	-0.1
29	112154	RRM1	DB00242;DB00441;DB00631;DB01005;DB01073	Cladribine;Gemcitabine;Clofarabine;Hydroxyurea;Fludarabine	0.111111111111111;0.333333333333333;0.5;1;0.333333333333333	Druggable	ENSP00000300738	Proteome	-1.47804	Melanocytes	-0.1
30	115573	SAP18				Not druggable	ENSP00000481842	Proteome	2.63711	PDX_111	-0.1
31	120465	CEP55				Not druggable	ENSP00000360540	Proteome	-2.82176	Melanocytes	0.142857
32	128962	RICTOR				Not druggable	ENSP00000349959	Proteome	2.72276	PDX_111	0.428571
33	106851	FAS				Not druggable	ENSP00000347979	Proteome	-2.71287	Melanocytes	-0.1
34	107305	CAV1				Not druggable	ENSP00000339191	Proteome	-5.03577	Melanocytes	-0.1
35	107458	CDK8				Not druggable	ENSP00000370938	Proteome	-2.56622	Melanocytes	-0.1
36	107920	CYLD				Not druggable	ENSP00000392025	Proteome	-3.09452	Melanocytes	-0.1
37	107982	DAPK1	DB12010	Fostamatinib	0.00333333333333333	Druggable	ENSP00000350785	Proteome	4.26439	PDX_111	0.285714
38	109202	GSTM3	DB00143	Glutathione	0.0238095238095238	Druggable	ENSP00000256594	Proteome	3.57444	PDX_111	-0.1
39	109884	ITGA5	DB02709	Resveratrol	0.04	Druggable	ENSP00000293379	Proteome	-4.86309	Melanocytes	-0.1
40	110929	NPM1				Not druggable	ENSP00000296930	Phospho	4.37292	PDX_111	-0.1
41	114646	AURKB	DB04703;DB12010	Hesperidin;Fostamatinib	1;0.00333333333333333	Druggable	ENSP00000313950	Proteome	-2.11369	Melanocytes	0.285714
42	114907	BAG3				Not druggable	ENSP00000358081	Proteome	-6.55099	Melanocytes	-0.1
43	124097	SLX4				Not druggable	ENSP00000294008	Proteome	-6.20049	Melanocytes	-0.1
44	139275	PEF1	DB11093;DB11348;DB14481	Calcium Citrate;Calcium Phosphate;Calcium phosphate dihydrate	0.0303030303030303;0.0303030303030303;0.0303030303030303	Druggable	ENSP00000362807	Proteome	-3.22652	Melanocytes	-0.1
45	106524	A2M	DB00102;DB00515;DB00626;DB01593;DB08888;DB12965;DB14487;DB14533	Becaplermin;Cisplatin;Bacitracin;Zinc;Ocriplasmin;Silver;Zinc acetate;Zinc chloride	0.333333333333333;0.25;0.5;0.00806451612903226;0.333333333333333;0.25;0.00806451612903226;0.00806451612903226	Druggable	ENSP00000323929	Proteome	4.97518	FFPE_111	0.142857
46	107435	CDH2				Not druggable	ENSP00000269141	Proteome	-9.36054	Melanocytes	0.142857
47	107788	CRK				Not druggable	ENSP00000300574	Phospho	-4.56754	Melanocytes	-0.1
48	107983	DAPK3	DB12010	Fostamatinib	0.00333333333333333	Druggable	ENSP00000301264	Proteome	-2.33853	Melanocytes	-0.1
49	108002	DCN	DB03754	Tromethamine	0.0769230769230769	Druggable	ENSP00000376862	Proteome	5.2097	FFPE_111	-0.1
50	108125	DNMT3A				Not druggable	ENSP00000264709	Proteome	3.75414	PDX_111	-0.1
51	108288	EPHA2	DB01254;DB08896;DB12010	Dasatinib;Regorafenib;Fostamatinib	0.0434782608695652;0.0555555555555556;0.00333333333333333	Druggable	ENSP00000351209	Proteome	-5.28509	Melanocytes	-0.1
52	108485	FAP				Not druggable	ENSP00000188790	Proteome	-3.92969	Melanocytes	-0.1
53	108564	FHL1				Not druggable	ENSP00000359717	Proteome	-5.51897	Melanocytes	-0.1
54	108607	FLNC				Not druggable	ENSP00000327145	Proteome	-6.01618	Melanocytes	-0.1
55	109072	SFN				Not druggable	ENSP00000340989	Proteome	-3.0471	Melanocytes	-0.1
56	109894	ITGB1	DB00098	Antithymocyte immunoglobulin (rabbit)	0.111111111111111	Druggable	ENSP00000303351	Proteome	-3.99336	Melanocytes	-0.1
57	110149	LGALS3	DB04465	Lactose	0.111111111111111	Druggable	ENSP00000254301	Proteome	1.85839	PDX_111	0.285714
58	110150	LGALS3BP				Not druggable	ENSP00000262776	Proteome	3.79637	FFPE_111	-0.1
59	110379	MAP3K3	DB12010	Fostamatinib	0.00333333333333333	Druggable	ENSP00000354927	Phospho	3.82826	PDX_111	-0.1
60	110816	NEDD9				Not druggable	ENSP00000368759	Proteome	4.56347	PDX_111	-0.1
61	111108	PAWR				Not druggable	ENSP00000328088	Proteome	-3.10595	Melanocytes	-0.1
62	111742	PTPN6				Not druggable	ENSP00000326010	Proteome	3.13568	FFPE_111	-0.1
63	111867	RBBP8				Not druggable	ENSP00000323050	Proteome	-4.15132	Melanocytes	-0.1
64	111868	RBL1				Not druggable	ENSP00000343646	Proteome	-3.29909	Melanocytes	-0.1
65	112678	STX3				Not druggable	ENSP00000338562	Proteome	2.87638	PDX_111	-0.1
66	113137	TUFT1				Not druggable	ENSP00000357842	Proteome	-2.53016	Melanocytes	-0.1
67	113251	VASP				Not druggable	ENSP00000245932	Proteome	-1.81962	Melanocytes	-0.1
68	113955	HIST1H4A				Not druggable	ENSP00000479106	Proteome	4.11521	FFPE_111	-0.1
69	114733	TRIP10				Not druggable	ENSP00000320117	Proteome	-2.19402	Melanocytes	-0.1
70	115137	CKAP5				Not druggable	ENSP00000310227	Proteome	-5.61452	Melanocytes	-0.1
71	115193	CEP170				Not druggable	ENSP00000355501	Proteome	5.17753	PDX_111	-0.1
72	115561	AKAP8				Not druggable	ENSP00000269701	Phospho	-2.96719	Melanocytes	-0.1
73	116634	ACIN1				Not druggable	ENSP00000262710	Phospho	4.63978	PDX_111	0.285714
74	116669	KDM4B				Not druggable	ENSP00000159111	Proteome	-4.77337	Melanocytes	-0.1
75	120635	HJURP				Not druggable	ENSP00000401944	Proteome	-3.53174	Melanocytes	0.142857
76	121354	CASC5				Not druggable	ENSP00000335463	Proteome	-2.22735	Melanocytes	0.285714
77	121654	SLAIN2				Not druggable	ENSP00000264313	Phospho	-4.34936	Melanocytes	-0.1
78	123163	CEP290				Not druggable	ENSP00000448012	Proteome	-3.61103	Melanocytes	0
79	124259	TUBA1C				Not druggable	ENSP00000443475	Proteome	-5.8228	Melanocytes	-0.1
80	106683	AGA				Not druggable	ENSP00000264595	Proteome	2.45257	FFPE_111	0.142857
81	106724	ALDH3B2	DB00157;DB09116	NADH;Calcium carbimide	0.00694444444444444;1	Druggable	ENSP00000255084	Proteome	5.71472	PDX_111	0.285714
82	106998	ATP5D	DB00228;DB00753;DB01028;DB01159;DB01189;DB01236	Enflurane;Isoflurane;Methoxyflurane;Halothane;Desflurane;Sevoflurane	0.142857142857143;0.1;0.125;0.0555555555555556;0.142857142857143;0.125	Druggable	ENSP00000215375	Proteome	-1.93757	Melanocytes	-0.1
83	107147	BSG				Not druggable	ENSP00000333769	Proteome	-1.46745	Melanocytes	-0.1
84	107188	C5	DB00028;DB01257;DB01593;DB09130;DB14487;DB14533	Immune Globulin Human;Eculizumab;Zinc;Copper;Zinc acetate;Zinc chloride	0.0909090909090909;1;0.00806451612903226;0.00680272108843537;0.00806451612903226;0.00806451612903226	Druggable	ENSP00000223642	Proteome	6.56068	FFPE_111	-0.1
85	107252	CALM1				Not druggable	ENSP00000349467	Proteome	2.56307	FFPE_111	-0.1
86	107306	CAV2				Not druggable	ENSP00000222693	Proteome	-2.80653	Melanocytes	-0.1
87	108332	CTTN				Not druggable	ENSP00000301843	Phospho	-9.31028	Melanocytes	-0.1
88	108478	ACSL4	DB00159;DB00412	Icosapent;Rosiglitazone	0.0909090909090909;0.142857142857143	Druggable	ENSP00000262835	Proteome	-7.02091	Melanocytes	-0.1
89	108964	GJA1	DB01136	Carvedilol	0.0588235294117647	Druggable	ENSP00000282561	Proteome	-6.69977	Melanocytes	-0.1
90	109275	HIST1H1A				Not druggable	ENSP00000244573	Proteome	-3.24557	Melanocytes	0.142857
91	109433	HNRNPU				Not druggable	ENSP00000393151	Phospho	6.33674	PDX_111	0
92	109931	JUP	DB01593;DB14487;DB14533	Zinc;Zinc acetate;Zinc chloride	0.00806451612903226;0.00806451612903226;0.00806451612903226	Druggable	ENSP00000311113	Proteome	-5.85127	Melanocytes	0.142857
93	110015	KIT	DB00398;DB00619;DB01254;DB01268;DB04868;DB06589;DB06595;DB08896;DB08901;DB09078;DB09103;DB12010	Sorafenib;Imatinib;Dasatinib;Sunitinib;Nilotinib;Pazopanib;Midostaurin;Regorafenib;Ponatinib;Lenvatinib;Ancestim;Fostamatinib	0.1;0.111111111111111;0.0434782608695652;0.125;0.5;0.1;0.166666666666667;0.0555555555555556;0.0666666666666667;0.125;1;0.00333333333333333	Druggable	ENSP00000288135	Proteome	4.02468	PDX_111	0.285714
94	110339	MCM2				Not druggable	ENSP00000265056	Phospho	4.72345	PDX_111	-0.1
95	110813	RPL10A				Not druggable	ENSP00000363018	Proteome	-1.65125	Melanocytes	-0.1
96	111345	PLAUR	DB00009;DB00013;DB00015;DB00029;DB00031	Alteplase;Urokinase;Reteplase;Anistreplase;Tenecteplase	0.25;0.1;0.25;0.25;0.0909090909090909	Druggable	ENSP00000221264	Proteome	-7.62106	Melanocytes	0.142857
97	111427	POLR2B				Not druggable	ENSP00000312735	Proteome	-6.66634	Melanocytes	-0.1
98	111591	MAP2K2	DB06616;DB08911;DB11967;DB12010	Bosutinib;Trametinib;Binimetinib;Fostamatinib	0.1;0.5;0.2;0.00333333333333333	Druggable	ENSP00000262948	Phospho	6.71753	PDX_111	-0.1
99	111759	PTPRJ				Not druggable	ENSP00000409733	Proteome	3.43817	PDX_111	0.285714
100	111760	PTPRK				Not druggable	ENSP00000357196	Proteome	-3.79441	Melanocytes	-0.1
101	111869	RBL2				Not druggable	ENSP00000262133	Proteome	3.99966	PDX_111	0.428571
102	112050	RPL7A				Not druggable	ENSP00000361076	Proteome	-1.67785	Melanocytes	-0.1
103	112079	RPL31				Not druggable	ENSP00000386717	Proteome	-1.6829	Melanocytes	-0.1
104	112671	AURKC	DB12010	Fostamatinib	0.00333333333333333	Druggable	ENSP00000302898	Proteome	-2.11369	Melanocytes	-0.1
105	112927	KLF10				Not druggable	ENSP00000285407	Proteome	-3.69599	Melanocytes	-0.1
106	113253	VAV2				Not druggable	ENSP00000360916	Proteome	-3.87862	Melanocytes	-0.1
107	113569	ZYX				Not druggable	ENSP00000324422	Proteome	-5.8359	Melanocytes	-0.1
108	113843	NRIP1				Not druggable	ENSP00000327213	Proteome	-4.63124	Melanocytes	-0.1
109	114176	CDK13				Not druggable	ENSP00000181839	Phospho	-4.17275	Melanocytes	-0.1
110	114507	RPL14				Not druggable	ENSP00000345156	Proteome	-1.63039	Melanocytes	-0.1
111	115487	TXNDC9				Not druggable	ENSP00000264255	Proteome	-2.10434	Melanocytes	-0.1
112	115783	NOP56				Not druggable	ENSP00000370589	Phospho	-5.07548	Melanocytes	0.285714
113	115804	HTATIP2				Not druggable	ENSP00000432107	Proteome	2.67973	PDX_111	-0.1
114	116059	PPP1R13L				Not druggable	ENSP00000354218	Proteome	-6.47732	Melanocytes	-0.1
115	116322	CORO1A				Not druggable	ENSP00000219150	Proteome	5.05836	FFPE_111	-0.1
116	116498	PHLDA1				Not druggable	ENSP00000480767	Proteome	-3.18497	Melanocytes	0.142857
117	116761	ZC3H3				Not druggable	ENSP00000262577	Proteome	-3.67844	Melanocytes	0.285714
118	117388	RPL36				Not druggable	ENSP00000378081	Proteome	-1.70367	Melanocytes	-0.1
119	117689	HSPB8				Not druggable	ENSP00000281938	Proteome	3.04728	PDX_111	-0.1
120	119376	NUSAP1				Not druggable	ENSP00000260359	Proteome	-6.02765	Melanocytes	0.428571
121	119613	HDAC7	DB05015;DB06603	Belinostat;Panobinostat	1;1	Druggable	ENSP00000080059	Proteome	-3.59691	Melanocytes	-0.1
122	120780	LYAR				Not druggable	ENSP00000345917	Proteome	-2.47019	Melanocytes	-0.1
123	120858	ENAH				Not druggable	ENSP00000355809	Phospho	3.54591	PDX_111	-0.1
124	122452	TRAK2				Not druggable	ENSP00000328875	Proteome	2.79167	PDX_111	0.285714
125	124393	AJUBA				Not druggable	ENSP00000262713	Proteome	-3.0054	Melanocytes	0.142857
126	125988	HSPB6				Not druggable	ENSP00000004982	Proteome	2.35881	FFPE_111	-0.1
127	131483	TUBB2B				Not druggable	ENSP00000259818	Proteome	2.78687	PDX_111	-0.1
128	106845	APOE	DB01593;DB09130;DB14487;DB14533	Zinc;Copper;Zinc acetate;Zinc chloride	0.00806451612903226;0.00680272108843537;0.00806451612903226;0.00806451612903226	Druggable	ENSP00000252486	Proteome	3.55955	FFPE_111	-0.1
129	107106	BID				Not druggable	ENSP00000318822	Proteome	-4.34793	Melanocytes	-0.1
130	107154	BTF3				Not druggable	ENSP00000338516	Proteome	4.67477	PDX_111	-0.1
131	107190	C6				Not druggable	ENSP00000263413	Proteome	3.23088	FFPE_111	0
132	107307	CAV3				Not druggable	ENSP00000341940	Proteome	-5.03577	Melanocytes	-0.1
133	107429	CDC25B				Not druggable	ENSP00000245960	Proteome	-4.36271	Melanocytes	-0.1
134	107491	CENPE				Not druggable	ENSP00000265148	Proteome	-3.3883	Melanocytes	0.285714
135	107798	CRY2				Not druggable	ENSP00000406751	Proteome	-3.49436	Melanocytes	-0.1
136	108072	NQO1	DB00170;DB00266;DB03147	Menadione;Dicoumarol;Flavin adenine dinucleotide	0.0769230769230769;0.333333333333333;0.0116279069767442	Druggable	ENSP00000319788	Proteome	2.77158	PDX_111	-0.1
137	108166	DSP	DB01593;DB14487;DB14533	Zinc;Zinc acetate;Zinc chloride	0.00806451612903226;0.00806451612903226;0.00806451612903226	Druggable	ENSP00000369129	Proteome	-3.54485	Melanocytes	-0.1
138	108386	ERCC6				Not druggable	ENSP00000348089	Proteome	-2.95385	Melanocytes	0.285714
139	108486	FBLN1				Not druggable	ENSP00000331544	Proteome	4.31896	FFPE_111	0.285714
140	108537	FGF1	DB00686;DB01025;DB01109;DB01942;DB06589;DB10770;DB10772	Pentosan Polysulfate;Amlexanox;Heparin;Formic Acid;Pazopanib;Foreskin fibroblast (neonatal);Foreskin keratinocyte (neonatal)	0.333333333333333;0.25;0.0833333333333333;0.02;0.1;0.0909090909090909;0.0833333333333333	Druggable	ENSP00000352329	Proteome	-6.95182	Melanocytes	-0.1
141	109203	GSTM4	DB00143	Glutathione	0.0238095238095238	Druggable	ENSP00000316471	Proteome	4.51968	PDX_111	-0.1
142	110073	KRT18				Not druggable	ENSP00000373487	Proteome	-7.80684	Melanocytes	-0.1
143	110573	MSH2				Not druggable	ENSP00000233146	Proteome	-2.01335	Melanocytes	-0.1
144	110902	NOP2				Not druggable	ENSP00000313272	Proteome	-2.34676	Melanocytes	0
145	111305	PIK3C2B	DB12010	Fostamatinib	0.00333333333333333	Druggable	ENSP00000356155	Proteome	4.26712	PDX_111	-0.1
146	111563	PRKAR2B				Not druggable	ENSP00000265717	Proteome	7.1241	PDX_111	-0.1
147	111643	PSEN2				Not druggable	ENSP00000355747	Proteome	3.65935	PDX_111	-0.1
148	111839	RANBP2				Not druggable	ENSP00000283195	Phospho	3.1941	PDX_111	-0.1
149	112108	RPS6				Not druggable	ENSP00000369743	Phospho	-8.34835	Melanocytes	-0.1
150	112150	RRAD				Not druggable	ENSP00000299759	Proteome	-4.71666	Melanocytes	-0.1
151	112155	RRM2	DB00242;DB05260	Cladribine;Gallium nitrate	0.111111111111111;0.2	Druggable	ENSP00000302955	Phospho	6.78507	PDX_111	-0.1
152	112342	SGCD				Not druggable	ENSP00000403003	Proteome	6.09191	PDX_111	0.142857
153	112681	STXBP1				Not druggable	ENSP00000362396	Proteome	2.58163	PDX_111	-0.1
154	113128	TUBA4A	DB00541;DB01179;DB06772	Vincristine;Podofilox;Cabazitaxel	0.5;0.333333333333333;0.5	Druggable	ENSP00000248437	Proteome	-4.72277	Melanocytes	-0.1
155	113758	KMT2D				Not druggable	ENSP00000301067	Phospho	-2.68446	Melanocytes	0.142857
156	114466	WASL				Not druggable	ENSP00000223023	Proteome	2.75156	PDX_111	-0.1
157	114505	SPAG9				Not druggable	ENSP00000262013	Phospho	3.40896	PDX_111	-0.1
158	114625	DDX21				Not druggable	ENSP00000346120	Proteome	-3.66941	Melanocytes	-0.1
159	114682	PDLIM7				Not druggable	ENSP00000347776	Proteome	-2.60206	Melanocytes	-0.1
160	114838	MAP4K4	DB12010	Fostamatinib	0.00333333333333333	Druggable	ENSP00000343658	Proteome	-5.1038	Melanocytes	-0.1
161	115239	RABGAP1L				Not druggable	ENSP00000251507	Proteome	-4.31238	Melanocytes	-0.1
162	115790	LEPREL2	DB00126;DB00139;DB00172	Ascorbic acid;Succinic acid;Proline	0.04;0.0384615384615385;0.0454545454545455	Druggable	ENSP00000478600	Proteome	-1.97335	Melanocytes	0.142857
163	118942	GNL2				Not druggable	ENSP00000362153	Proteome	-3.30812	Melanocytes	-0.1
164	120260	DNAAF5				Not druggable	ENSP00000297440	Proteome	-6.08455	Melanocytes	0.142857
165	120424	ARHGAP17				Not druggable	ENSP00000289968	Phospho	-4.81916	Melanocytes	-0.1
166	120437	RBM28				Not druggable	ENSP00000390517	Proteome	-1.85276	Melanocytes	-0.1
167	121353	DDX24				Not druggable	ENSP00000452145	Phospho	5.90818	PDX_111	0.428571
168	122983	PRR5L				Not druggable	ENSP00000368144	Proteome	-4.23877	Melanocytes	0.142857
169	123630	KIF18A				Not druggable	ENSP00000263181	Proteome	-6.05158	Melanocytes	0.142857
170	124083	LZTS2				Not druggable	ENSP00000359243	Proteome	3.32456	PDX_111	-0.1
171	124148	TUBB6				Not druggable	ENSP00000318697	Proteome	-1.95488	Melanocytes	0
172	131462	TUBB8				Not druggable	ENSP00000457062	Proteome	-2.53591	Melanocytes	-0.1
173	120482	RIF1				Not druggable	ENSP00000390181	Phospho	3.98627	PDX_111	0.142857
174	116889	ANKS1A				Not druggable	ENSP00000353518	Phospho	6.08297	PDX_111	0.142857
175	112682	STXBP2				Not druggable	ENSP00000221283	Proteome	-4.59311	Melanocytes	0
176	114221	VAMP8				Not druggable	ENSP00000263864	Proteome	3.74784	FFPE_111	-0.1
177	129628	CEP170B				Not druggable	ENSP00000404151	Phospho	6.32964	PDX_111	-0.1
178	109290	HBA2	DB00358;DB00893;DB01592;DB01593;DB06154;DB09112;DB09130;DB09140;DB09146;DB09517;DB13995;DB14487;DB14488;DB14489;DB14490;DB14491;DB14501;DB14533	Mefloquine;Iron Dextran;Iron;Zinc;Pentaerythritol tetranitrate;Nitrous acid;Copper;Oxygen;Iron saccharate;Sodium ferric gluconate complex;Ferric pyrophosphate citrate;Zinc acetate;Ferrous gluconate;Ferrous succinate;Ferrous ascorbate;Ferrous fumarate;Ferrous glycine sulfate;Zinc chloride	0.5;0.25;0.0769230769230769;0.00806451612903226;0.5;0.333333333333333;0.00680272108843537;0.25;1;0.333333333333333;0.25;0.00806451612903226;0.0769230769230769;0.0769230769230769;0.0769230769230769;0.0769230769230769;0.0769230769230769;0.00806451612903226	Druggable	ENSP00000251595	Proteome	5.64194	FFPE_111	-0.1
179	109293	HBB	DB00893;DB01593;DB06154;DB09112;DB09130;DB09140;DB09517;DB13995;DB14487;DB14533	Iron Dextran;Zinc;Pentaerythritol tetranitrate;Nitrous acid;Copper;Oxygen;Sodium ferric gluconate complex;Ferric pyrophosphate citrate;Zinc acetate;Zinc chloride	0.25;0.00806451612903226;0.5;0.333333333333333;0.00680272108843537;0.25;0.333333333333333;0.25;0.00806451612903226;0.00806451612903226	Druggable	ENSP00000333994	Proteome	16.3851	FFPE_111	-0.1
180	106723	ALDH3B1	DB00157	NADH	0.00694444444444444	Druggable	ENSP00000473990	Proteome	5.71472	PDX_111	0
181	116783	GPD1L				Not druggable	ENSP00000282541	Proteome	2.48306	PDX_111	-0.1
182	107005	ATP5I				Not druggable	ENSP00000306003	Proteome	3.0376	PDX_111	-0.1
183	106717	ABCD1				Not druggable	ENSP00000218104	Proteome	7.29887	PDX_111	-0.1
184	110304	MAP1B				Not druggable	ENSP00000296755	Proteome	-2.14135	Melanocytes	0.142857
185	114398	SGPL1	DB00114	Pyridoxal Phosphate	0.0149253731343284	Druggable	ENSP00000362298	Proteome	-6.28557	Melanocytes	-0.1
186	109602	TNC				Not druggable	ENSP00000339553	Proteome	-2.81104	Melanocytes	0.142857
187	106716	ALCAM				Not druggable	ENSP00000305988	Proteome	-2.23721	Melanocytes	0.285714
188	130846	CCDC137				Not druggable	ENSP00000329360	Proteome	-3.60111	Melanocytes	0.142857
189	108992	GCLM	DB00142;DB00151	Glutamic Acid;L-Cysteine	0.0142857142857143;0.0769230769230769	Druggable	ENSP00000484507	Proteome	-2.31015	Melanocytes	-0.1
190	110295	MAN2A2				Not druggable	ENSP00000353655	Proteome	4.31657	PDX_111	-0.1
191	122815	MANEA				Not druggable	ENSP00000351669	Proteome	-3.22313	Melanocytes	-0.1
192	107688	COL6A1				Not druggable	ENSP00000355180	Proteome	4.59023	FFPE_111	0.285714
193	107689	COL6A2				Not druggable	ENSP00000300527	Proteome	6.82847	FFPE_111	0.142857
194	117313	DSTYK				Not druggable	ENSP00000356129	Proteome	2.48727	PDX_111	0
195	108901	GBAS				Not druggable	ENSP00000313050	Proteome	2.86111	PDX_111	-0.1
196	107787	CRIP2				Not druggable	ENSP00000446875	Proteome	-2.50753	Melanocytes	-0.1
197	108857	GALK1				Not druggable	ENSP00000225614	Proteome	2.50606	FFPE_111	-0.1
198	115932	CCT6B				Not druggable	ENSP00000327191	Proteome	3.58895	PDX_111	0
199	124841	ANKRD44				Not druggable	ENSP00000282272	Proteome	3.10141	PDX_111	-0.1

## Sheet: Sheet 4
Interaction network of omics significantly changing entries for patient ID 129
ID	biogrid	label	DrugBank ID	DrugBank name	Specificity	Druggable	CrossDB ID	Omics	Ratio	Samples	Scaled impact score
1	107427	CDC20				Not druggable	ENSP00000308450	Proteome	-4.69285	Melanocytes	-0.1
2	107166	BUB1B				Not druggable	ENSP00000287598	Proteome	-4.4539	Melanocytes	0.285714
3	108276	EGFR	DB00002;DB00072;DB00281;DB00317;DB00530;DB01259;DB01269;DB05294;DB08916;DB09330;DB09559;DB10772;DB11828;DB11963;DB12010;DB12267	Cetuximab;Trastuzumab;Lidocaine;Gefitinib;Erlotinib;Lapatinib;Panitumumab;Vandetanib;Afatinib;Osimertinib;Necitumumab;Foreskin keratinocyte (neonatal);Neratinib;Dacomitinib;Fostamatinib;Brigatinib	0.0833333333333333;0.0769230769230769;0.142857142857143;1;0.5;0.5;1;0.2;0.333333333333333;1;1;0.0833333333333333;1;1;0.00333333333333333;0.111111111111111	Druggable	ENSP00000342376	Proteome	-3.86297	Melanocytes	0.285714
4	114397	SQSTM1				Not druggable	ENSP00000374455	Phospho	6.01508	PDX_129	-0.1
5	107800	CRYAB				Not druggable	ENSP00000227251	Proteome	2.78298	PDX_129	-0.1
6	123565	MAP1LC3B				Not druggable	ENSP00000268607	Proteome	-2.54099	Melanocytes	-0.1
7	107027	ATR				Not druggable	ENSP00000343741	Proteome	-2.75341	Melanocytes	0.428571
8	123747	ITCH				Not druggable	ENSP00000363998	Phospho	-6.10237	Melanocytes	-0.1
9	313463	ATRIP				Not druggable	ENSP00000302338	Proteome	-4.16567	Melanocytes	-0.1
10	107843	CSNK2B				Not druggable	ENSP00000365042	Proteome	-6.14618	Melanocytes	-0.1
11	110381	MAP3K5				Not druggable	ENSP00000351908	Proteome	3.59823	PDX_129	-0.1
12	111384	PML	DB01169	Arsenic trioxide	0.1	Druggable	ENSP00000268058	Proteome	-1.88896	Melanocytes	-0.1
13	112748	MAP3K7				Not druggable	ENSP00000358331	Phospho	-7.54065	Melanocytes	-0.1
14	115457	TRIM28				Not druggable	ENSP00000253024	Phospho	-6.39745	Melanocytes	-0.1
15	107465	CDKN2C				Not druggable	ENSP00000360826	Proteome	2.44734	PDX_129	-0.1
16	107164	BUB1				Not druggable	ENSP00000302530	Proteome	-7.01168	Melanocytes	-0.1
17	111508	PPP2CB	DB00163;DB14001;DB14002	Vitamin E;alpha-Tocopherol succinate;D-alpha-Tocopherol acetate	0.1;0.1;0.1	Druggable	ENSP00000221138	Proteome	3.89121	FFPE_129	-0.1
18	112967	TMPO				Not druggable	ENSP00000266732	Phospho	-9.2408	Melanocytes	-0.1
19	107434	CDH1				Not druggable	ENSP00000261769	Proteome	4.28501	PDX_129	-0.1
20	108497	FBP1	DB00131	Adenosine phosphate	0.0666666666666667	Druggable	ENSP00000364475	Proteome	6.8461	FFPE_129	0
21	108773	FTH1	DB00893;DB01592;DB13995;DB14488;DB14489;DB14490;DB14491;DB14501	Iron Dextran;Iron;Ferric pyrophosphate citrate;Ferrous gluconate;Ferrous succinate;Ferrous ascorbate;Ferrous fumarate;Ferrous glycine sulfate	0.25;0.0769230769230769;0.25;0.0769230769230769;0.0769230769230769;0.0769230769230769;0.0769230769230769;0.0769230769230769	Druggable	ENSP00000273550	Proteome	4.33479	FFPE_129	-0.1
22	108789	FTL	DB00893;DB09517;DB13995	Iron Dextran;Sodium ferric gluconate complex;Ferric pyrophosphate citrate	0.25;0.333333333333333;0.25	Druggable	ENSP00000366525	Proteome	6.27863	FFPE_129	-0.1
23	109512	PRMT1				Not druggable	ENSP00000375724	Proteome	-3.55541	Melanocytes	-0.1
24	110186	LMNA				Not druggable	ENSP00000292304	Phospho	-5.59883	Melanocytes	-0.1
25	112670	STK11				Not druggable	ENSP00000467240	Proteome	-3.72943	Melanocytes	-0.1
26	118893	UHRF1				Not druggable	ENSP00000485604	Proteome	-3.88512	Melanocytes	0.285714
27	106962	ATM	DB00201	Caffeine	0.0909090909090909	Druggable	ENSP00000278616	Proteome	3.40185	PDX_129	0.142857
28	107456	CDK6	DB09073;DB11730;DB12001	Palbociclib;Ribociclib;Abemaciclib	0.5;0.5;0.5	Druggable	ENSP00000265734	Proteome	-3.5893	Melanocytes	-0.1
29	108083	DLG1				Not druggable	ENSP00000345731	Proteome	-2.13465	Melanocytes	-0.1
30	108480	PTK2B	DB01097;DB11817;DB12010	Leflunomide;Baricitinib;Fostamatinib	0.333333333333333;0.25;0.00333333333333333	Druggable	ENSP00000332816	Proteome	-4.74199	Melanocytes	0.285714
31	108565	FHL2				Not druggable	ENSP00000322909	Proteome	-1.89611	Melanocytes	-0.1
32	111125	PCBD1				Not druggable	ENSP00000299299	Proteome	5.77826	PDX_129	-0.1
33	111811	RAB27A				Not druggable	ENSP00000337761	Proteome	1.17076	FFPE_129	-0.1
34	111903	RELB				Not druggable	ENSP00000423287	Proteome	-4.81118	Melanocytes	-0.1
35	116698	WAPAL				Not druggable	ENSP00000298767	Proteome	-4.79236	Melanocytes	-0.1
36	121140	PRMT8				Not druggable	ENSP00000372067	Proteome	-3.55541	Melanocytes	-0.1
37	125120	SYTL4	DB00030;DB00071	Insulin Human;Insulin Pork	0.0833333333333333;0.0714285714285714	Druggable	ENSP00000276141	Proteome	2.42159	PDX_129	0
38	128632	SKA1				Not druggable	ENSP00000285116	Proteome	-4.79527	Melanocytes	-0.1
39	106901	ARRB1				Not druggable	ENSP00000353124	Proteome	1.84274	PDX_129	-0.1
40	107569	CHUK	DB00233;DB00244;DB00795;DB06151	Aminosalicylic Acid;Mesalazine;Sulfasalazine;Acetylcysteine	0.2;0.125;0.1;0.1	Druggable	ENSP00000359424	Proteome	-2.52723	Melanocytes	0
41	108605	FLNA				Not druggable	ENSP00000358866	Phospho	-5.9715	Melanocytes	-0.1
42	109420	HNRNPA1				Not druggable	ENSP00000341826	Proteome	-6.42101	Melanocytes	-0.1
43	109707	IGFBP3	DB00523;DB01277	Alitretinoin;Mecasermin	0.111111111111111;0.25	Druggable	ENSP00000275521	Proteome	2.0939	PDX_129	0.142857
44	109854	INSR	DB00030;DB00046;DB00047;DB00071;DB01277;DB01306;DB01307;DB01309;DB09129;DB09564;DB12010;DB12267	Insulin Human;Insulin Lispro;Insulin Glargine;Insulin Pork;Mecasermin;Insulin Aspart;Insulin Detemir;Insulin Glulisine;Chromic chloride;Insulin Degludec;Fostamatinib;Brigatinib	0.0833333333333333;0.5;0.5;0.0714285714285714;0.25;1;1;1;1;1;0.00333333333333333;0.111111111111111	Druggable	ENSP00000342838	Proteome	2.97249	PDX_129	0.142857
45	109928	JUN	DB00570;DB00852;DB01029;DB01169	Vinblastine;Pseudoephedrine;Irbesartan;Arsenic trioxide	0.166666666666667;0.0909090909090909;0.5;0.1	Druggable	ENSP00000360266	Proteome	-4.94775	Melanocytes	-0.1
46	110863	TONSL				Not druggable	ENSP00000386239	Proteome	-2.62812	Melanocytes	0.285714
47	110929	NPM1				Not druggable	ENSP00000296930	Phospho	5.698	PDX_129	-0.1
48	112179	S100A1	DB00768	Olopatadine	0.166666666666667	Druggable	ENSP00000292169	Proteome	10.1631	PDX_129	-0.1
49	114572	PDLIM1				Not druggable	ENSP00000360305	Proteome	-5.16578	Melanocytes	0.142857
50	114809	TJP2				Not druggable	ENSP00000345893	Proteome	-2.63565	Melanocytes	0.142857
51	115794	DCTN2				Not druggable	ENSP00000447824	Proteome	-1.72032	Melanocytes	0
52	116970	NCAPH				Not druggable	ENSP00000240423	Proteome	-2.1734	Melanocytes	-0.1
53	123545	FIP1L1				Not druggable	ENSP00000336752	Phospho	8.45315	PDX_129	-0.1
54	106524	A2M	DB00102;DB00515;DB00626;DB01593;DB08888;DB12965;DB14487;DB14533	Becaplermin;Cisplatin;Bacitracin;Zinc;Ocriplasmin;Silver;Zinc acetate;Zinc chloride	0.333333333333333;0.25;0.5;0.00806451612903226;0.333333333333333;0.25;0.00806451612903226;0.00806451612903226	Druggable	ENSP00000323929	Proteome	6.94124	FFPE_129	0.142857
55	107048	BAD				Not druggable	ENSP00000309103	Phospho	3.57151	PDX_129	-0.1
56	107983	DAPK3	DB12010	Fostamatinib	0.00333333333333333	Druggable	ENSP00000301264	Proteome	-5.59824	Melanocytes	-0.1
57	108002	DCN	DB03754	Tromethamine	0.0769230769230769	Druggable	ENSP00000376862	Proteome	6.253	FFPE_129	-0.1
58	108125	DNMT3A				Not druggable	ENSP00000264709	Proteome	2.2451	PDX_129	0.285714
59	108474	FANCD2				Not druggable	ENSP00000287647	Proteome	-3.31385	Melanocytes	0.142857
60	108607	FLNC				Not druggable	ENSP00000327145	Proteome	-2.77354	Melanocytes	-0.1
61	108621	FN1	DB01593;DB08888;DB14487;DB14533	Zinc;Ocriplasmin;Zinc acetate;Zinc chloride	0.00806451612903226;0.333333333333333;0.00806451612903226;0.00806451612903226	Druggable	ENSP00000338200	Proteome	-3.99326	Melanocytes	0.428571
62	109187	GSK3B	DB12010;DB14507;DB14509	Fostamatinib;Lithium citrate;Lithium carbonate	0.00333333333333333;0.25;0.25	Druggable	ENSP00000264235	Proteome	-1.84761	Melanocytes	-0.1
63	109610	ICAM1	DB00108;DB08818	Natalizumab;Hyaluronic acid	0.0833333333333333;0.0666666666666667	Druggable	ENSP00000264832	Proteome	2.7632	FFPE_129	-0.1
64	109709	IGFBP5				Not druggable	ENSP00000233813	Proteome	4.54963	PDX_129	-0.1
65	110816	NEDD9				Not druggable	ENSP00000368759	Proteome	5.62021	PDX_129	-0.1
66	110858	NFKB2	DB00945;DB01296;DB13751;DB13961	Acetylsalicylic acid;Glucosamine;Glycyrrhizic acid;Fish oil	0.0909090909090909;0.2;0.2;0.111111111111111	Druggable	ENSP00000189444	Proteome	-2.13769	Melanocytes	-0.1
67	111185	PDGFRB	DB00102;DB00398;DB00619;DB01254;DB01268;DB06589;DB06595;DB08896;DB10770;DB12010	Becaplermin;Sorafenib;Imatinib;Dasatinib;Sunitinib;Pazopanib;Midostaurin;Regorafenib;Foreskin fibroblast (neonatal);Fostamatinib	0.333333333333333;0.1;0.111111111111111;0.0434782608695652;0.125;0.1;0.166666666666667;0.0555555555555556;0.0909090909090909;0.00333333333333333	Druggable	ENSP00000261799	Proteome	2.48352	PDX_129	-0.1
68	111414	SEPT5				Not druggable	ENSP00000391311	Proteome	4.07301	PDX_129	-0.1
69	111563	PRKAR2B				Not druggable	ENSP00000265717	Proteome	3.8352	FFPE_129	-0.1
70	111681	PSMD2				Not druggable	ENSP00000310129	Phospho	4.25049	PDX_129	0.142857
71	111742	PTPN6				Not druggable	ENSP00000326010	Proteome	4.86886	FFPE_129	-0.1
72	112189	S100A10				Not druggable	ENSP00000357801	Proteome	-3.79934	Melanocytes	-0.1
73	112753	TAP1				Not druggable	ENSP00000346206	Proteome	2.239	FFPE_129	-0.1
74	112899	TGFB1I1				Not druggable	ENSP00000355117	Phospho	-7.01726	Melanocytes	-0.1
75	112937	TJP1				Not druggable	ENSP00000281537	Phospho	-8.07536	Melanocytes	-0.1
76	113742	FOSL1				Not druggable	ENSP00000310170	Proteome	-6.46304	Melanocytes	-0.1
77	114141	CASK	DB01942;DB12010	Formic Acid;Fostamatinib	0.02;0.00333333333333333	Druggable	ENSP00000400526	Proteome	-4.53956	Melanocytes	0.285714
78	114449	WASF1				Not druggable	ENSP00000352425	Proteome	-5.42333	Melanocytes	-0.1
79	114873	KIF23				Not druggable	ENSP00000260363	Proteome	-4.2179	Melanocytes	-0.1
80	114890	FXR2				Not druggable	ENSP00000250113	Phospho	-7.23006	Melanocytes	-0.1
81	114907	BAG3				Not druggable	ENSP00000358081	Proteome	-2.09546	Melanocytes	0.142857
82	114934	BCAR1				Not druggable	ENSP00000162330	Proteome	-2.71538	Melanocytes	0.428571
83	115362	SMC4				Not druggable	ENSP00000341382	Proteome	-6.735	Melanocytes	-0.1
84	115721	BAIAP2				Not druggable	ENSP00000316338	Phospho	3.47972	PDX_129	0
85	116770	SEPT6				Not druggable	ENSP00000353278	Proteome	3.17735	PDX_129	-0.1
86	116945	ARHGEF12				Not druggable	ENSP00000380942	Proteome	-3.35751	Melanocytes	-0.1
87	119068	WRAP73				Not druggable	ENSP00000270708	Proteome	2.90976	PDX_129	-0.1
88	119153	F11R				Not druggable	ENSP00000357005	Proteome	-3.89694	Melanocytes	-0.1
89	119613	HDAC7	DB05015;DB06603	Belinostat;Panobinostat	1;1	Druggable	ENSP00000080059	Proteome	-5.81168	Melanocytes	-0.1
90	119923	ERRFI1				Not druggable	ENSP00000366702	Proteome	-3.79622	Melanocytes	-0.1
91	121354	CASC5				Not druggable	ENSP00000335463	Proteome	-5.22773	Melanocytes	0.285714
92	123163	CEP290				Not druggable	ENSP00000448012	Proteome	-4.19333	Melanocytes	-0.1
93	124605	NAV1				Not druggable	ENSP00000356264	Phospho	-7.88428	Melanocytes	-0.1
94	125225	CDCA5				Not druggable	ENSP00000275517	Proteome	-4.55303	Melanocytes	-0.1
95	106602	ACTN1	DB06773;DB09130	Human calcitonin;Copper	1;0.00680272108843537	Druggable	ENSP00000193403	Proteome	-3.09506	Melanocytes	-0.1
96	107603	CLU	DB01593;DB09130;DB14487;DB14533	Zinc;Copper;Zinc acetate;Zinc chloride	0.00806451612903226;0.00680272108843537;0.00806451612903226;0.00806451612903226	Druggable	ENSP00000315130	Proteome	11.0183	FFPE_129	-0.1
97	109072	SFN				Not druggable	ENSP00000340989	Proteome	-3.37122	Melanocytes	-0.1
98	109205	GSTP1	DB00143;DB00316;DB00363;DB00903;DB01015;DB01242;DB03619;DB04339;DB09462;DB11672	Glutathione;Acetaminophen;Clozapine;Etacrynic acid;Sulfamethoxazole;Clomipramine;Deoxycholic Acid;Carbocisteine;Glycerin;Curcumin	0.0238095238095238;0.2;0.037037037037037;0.25;0.333333333333333;0.166666666666667;0.0909090909090909;1;0.04;0.2	Druggable	ENSP00000381607	Proteome	-1.68465	Melanocytes	0
99	109874	IRS1				Not druggable	ENSP00000304895	Proteome	-6.36733	Melanocytes	0.285714
100	109882	ITGA3				Not druggable	ENSP00000315190	Proteome	-2.839	Melanocytes	-0.1
101	109896	ITGB3	DB00054;DB00063;DB00098;DB00775;DB02709	Abciximab;Eptifibatide;Antithymocyte immunoglobulin (rabbit);Tirofiban;Resveratrol	0.0714285714285714;1;0.111111111111111;0.5;0.04	Druggable	ENSP00000452786	Proteome	4.52762	PDX_129	-0.1
102	109931	JUP	DB01593;DB14487;DB14533	Zinc;Zinc acetate;Zinc chloride	0.00806451612903226;0.00806451612903226;0.00806451612903226	Druggable	ENSP00000311113	Proteome	-5.78025	Melanocytes	0.142857
103	110339	MCM2				Not druggable	ENSP00000265056	Phospho	5.95426	PDX_129	-0.1
104	110457	MMP2	DB01197	Captopril	0.2	Druggable	ENSP00000219070	Proteome	2.49025	PDX_129	-0.1
105	110962	NT5E	DB00806	Pentoxifylline	0.166666666666667	Druggable	ENSP00000257770	Proteome	-4.92144	Melanocytes	0.285714
106	111108	PAWR				Not druggable	ENSP00000328088	Proteome	-2.63783	Melanocytes	-0.1
107	111338	PLA2G4A	DB00588	Fluticasone propionate	0.25	Druggable	ENSP00000356436	Proteome	3.43866	PDX_129	0.142857
108	111345	PLAUR	DB00009;DB00013;DB00015;DB00029;DB00031	Alteplase;Urokinase;Reteplase;Anistreplase;Tenecteplase	0.25;0.1;0.25;0.25;0.0909090909090909	Druggable	ENSP00000221264	Proteome	-5.24018	Melanocytes	0.142857
109	111347	PLCB3				Not druggable	ENSP00000443631	Proteome	-3.41226	Melanocytes	-0.1
110	111528	PPP5C				Not druggable	ENSP00000012443	Proteome	-5.67711	Melanocytes	-0.1
111	111680	PSMD1				Not druggable	ENSP00000309474	Proteome	-3.83683	Melanocytes	-0.1
112	111760	PTPRK				Not druggable	ENSP00000357196	Proteome	-5.80091	Melanocytes	-0.1
113	112188	S100A9	DB01373;DB01593;DB14487;DB14533	Calcium;Zinc;Zinc acetate;Zinc chloride	0.05;0.00806451612903226;0.00806451612903226;0.00806451612903226	Druggable	ENSP00000357727	Proteome	6.38859	FFPE_129	-0.1
114	112342	SGCD				Not druggable	ENSP00000403003	Proteome	4.87107	FFPE_129	-0.1
115	112917	THBS3				Not druggable	ENSP00000357362	Proteome	3.58504	PDX_129	-0.1
116	113021	TPM1				Not druggable	ENSP00000452879	Proteome	9.74432	FFPE_129	-0.1
117	113055	TRIO				Not druggable	ENSP00000339299	Proteome	-3.9989	Melanocytes	-0.1
118	114000	BCAR3				Not druggable	ENSP00000260502	Proteome	-2.52582	Melanocytes	-0.1
119	114202	NUMB				Not druggable	ENSP00000347169	Phospho	-5.23889	Melanocytes	-0.1
120	114317	FBP2				Not druggable	ENSP00000364486	Proteome	6.8461	FFPE_129	0
121	114393	ARHGEF7				Not druggable	ENSP00000218789	Proteome	3.77475	FFPE_129	-0.1
122	114754	SLC9A3R2				Not druggable	ENSP00000408005	Proteome	-3.14085	Melanocytes	-0.1
123	114769	SLC9A3R1				Not druggable	ENSP00000262613	Proteome	-1.67605	Melanocytes	-0.1
124	114974	NCOR2				Not druggable	ENSP00000384018	Phospho	-7.87708	Melanocytes	0.428571
125	115193	CEP170				Not druggable	ENSP00000355500	Phospho	-7.99168	Melanocytes	0.285714
126	115704	IFI30				Not druggable	ENSP00000384886	Proteome	5.06447	FFPE_129	-0.1
127	115723	TACC3				Not druggable	ENSP00000326550	Proteome	-4.00624	Melanocytes	0.428571
128	115978	GIPC1				Not druggable	ENSP00000340698	Proteome	-2.3441	Melanocytes	-0.1
129	116221	RAB31				Not druggable	ENSP00000461945	Proteome	-4.57251	Melanocytes	-0.1
130	116322	CORO1A				Not druggable	ENSP00000219150	Proteome	4.09965	FFPE_129	-0.1
131	116848	PDS5A				Not druggable	ENSP00000303427	Phospho	5.33117	PDX_129	-0.1
132	117194	SH3BP4				Not druggable	ENSP00000375867	Phospho	3.78654	PDX_129	-0.1
133	118892	RACGAP1				Not druggable	ENSP00000309871	Proteome	-2.89369	Melanocytes	-0.1
134	119286	SCCPDH				Not druggable	ENSP00000355467	Proteome	3.02317	PDX_129	0
135	120675	DNAJA4				Not druggable	ENSP00000339581	Proteome	2.719	PDX_129	-0.1
136	123527	NDEL1				Not druggable	ENSP00000333982	Proteome	-5.01581	Melanocytes	-0.1
137	124390	UBASH3B				Not druggable	ENSP00000284273	Proteome	-4.93924	Melanocytes	-0.1
138	125011	IGSF8				Not druggable	ENSP00000316664	Proteome	2.61552	PDX_129	-0.1
139	125988	HSPB6				Not druggable	ENSP00000004982	Proteome	3.12047	FFPE_129	-0.1
140	126318	SCLT1				Not druggable	ENSP00000281142	Proteome	-4.34324	Melanocytes	0.285714
141	127339	SEPT10				Not druggable	ENSP00000380824	Proteome	-5.7431	Melanocytes	-0.1
142	128691	SKA3				Not druggable	ENSP00000319417	Proteome	-6.50037	Melanocytes	-0.1
143	129776	GDPD1				Not druggable	ENSP00000464690	Proteome	4.23992	PDX_129	-0.1
144	106845	APOE	DB01593;DB09130;DB14487;DB14533	Zinc;Copper;Zinc acetate;Zinc chloride	0.00806451612903226;0.00680272108843537;0.00806451612903226;0.00806451612903226	Druggable	ENSP00000252486	Proteome	3.86838	PDX_129	-0.1
145	107366	CD9				Not druggable	ENSP00000009180	Proteome	3.45558	PDX_129	-0.1
146	108131	DOK1				Not druggable	ENSP00000233668	Proteome	-3.8804	Melanocytes	-0.1
147	108166	DSP	DB01593;DB14487;DB14533	Zinc;Zinc acetate;Zinc chloride	0.00806451612903226;0.00806451612903226;0.00806451612903226	Druggable	ENSP00000369129	Proteome	-10.8729	Melanocytes	-0.1
148	108486	FBLN1				Not druggable	ENSP00000262722	Proteome	2.82431	FFPE_129	0.285714
149	108606	FLNB				Not druggable	ENSP00000420213	Proteome	-4.83305	Melanocytes	0.285714
150	109895	ITGB2	DB00641	Simvastatin	0.333333333333333	Druggable	ENSP00000303242	Proteome	5.15981	FFPE_129	-0.1
151	110712	MYH9				Not druggable	ENSP00000216181	Proteome	-2.99497	Melanocytes	0.142857
152	110751	HNRNPM				Not druggable	ENSP00000325376	Phospho	-6.39651	Melanocytes	-0.1
153	110959	YBX1				Not druggable	ENSP00000361626	Proteome	-4.95634	Melanocytes	-0.1
154	111521	PPP2R5E				Not druggable	ENSP00000404632	Proteome	-5.22712	Melanocytes	-0.1
155	112183	S100A4	DB00831;DB09130	Trifluoperazine;Copper	0.166666666666667;0.00680272108843537	Druggable	ENSP00000346294	Proteome	5.61352	FFPE_129	-0.1
156	112287	SDCBP				Not druggable	ENSP00000409288	Proteome	2.58164	PDX_129	-0.1
157	112538	SOS2				Not druggable	ENSP00000216373	Proteome	-4.35673	Melanocytes	-0.1
158	112754	TAP2				Not druggable	ENSP00000364032	Proteome	1.23395	FFPE_129	-0.1
159	112785	TCEB2				Not druggable	ENSP00000262306	Proteome	2.67329	PDX_129	0.142857
160	112809	TCOF1				Not druggable	ENSP00000325223	Phospho	-5.56816	Melanocytes	0
161	113128	TUBA4A	DB00541;DB01179;DB06772	Vincristine;Podofilox;Cabazitaxel	0.5;0.333333333333333;0.5	Druggable	ENSP00000248437	Proteome	-4.61427	Melanocytes	0
162	113569	ZYX				Not druggable	ENSP00000324422	Phospho	-7.02296	Melanocytes	0
163	113735	RASSF7				Not druggable	ENSP00000380712	Proteome	-3.82404	Melanocytes	0.142857
164	114024	DUSP11				Not druggable	ENSP00000272444	Proteome	-3.98849	Melanocytes	0
165	114625	DDX21				Not druggable	ENSP00000346120	Proteome	-4.23349	Melanocytes	-0.1
166	114682	PDLIM7				Not druggable	ENSP00000347776	Proteome	-3.21588	Melanocytes	-0.1
167	115017	PDE4DIP				Not druggable	ENSP00000316434	Proteome	-2.19006	Melanocytes	0.142857
168	116418	DCTN3				Not druggable	ENSP00000259632	Proteome	-2.09915	Melanocytes	-0.1
169	116826	FBXO28				Not druggable	ENSP00000355827	Phospho	-7.12273	Melanocytes	-0.1
170	117071	SRRM2				Not druggable	ENSP00000301740	Phospho	-6.91633	Melanocytes	0.428571
171	117163	KPNA6				Not druggable	ENSP00000362728	Proteome	-5.51326	Melanocytes	-0.1
172	118946	CPSF1				Not druggable	ENSP00000484669	Proteome	-6.70692	Melanocytes	-0.1
173	119001	PSAT1	DB00114;DB00142	Pyridoxal Phosphate;Glutamic Acid	0.0149253731343284;0.0142857142857143	Druggable	ENSP00000365773	Proteome	-3.99694	Melanocytes	-0.1
174	119676	SUFU				Not druggable	ENSP00000358915	Proteome	-4.3239	Melanocytes	-0.1
175	122494	AHNAK				Not druggable	ENSP00000367263	Phospho	-8.96327	Melanocytes	0.142857
176	131515	SKA2				Not druggable	ENSP00000333433	Proteome	-5.09393	Melanocytes	-0.1
177	111520	PPP2R5D				Not druggable	ENSP00000417963	Phospho	-5.75722	Melanocytes	-0.1
178	119696	CAB39				Not druggable	ENSP00000258418	Proteome	-2.51413	Melanocytes	-0.1
179	111352	PLCG2				Not druggable	ENSP00000352336	Proteome	3.81044	FFPE_129	-0.1
180	116889	ANKS1A				Not druggable	ENSP00000353518	Phospho	10.8908	PDX_129	0.142857
181	109146	RAPGEF1				Not druggable	ENSP00000361263	Proteome	-5.35816	Melanocytes	-0.1
182	121017	BAIAP2L1				Not druggable	ENSP00000005260	Proteome	-2.39874	Melanocytes	-0.1
183	116891	BICD2				Not druggable	ENSP00000349351	Proteome	-1.6364	Melanocytes	-0.1
184	122736	RNF219				Not druggable	ENSP00000282003	Proteome	-4.22342	Melanocytes	-0.1
185	110304	MAP1B				Not druggable	ENSP00000296755	Phospho	-7.50715	Melanocytes	0.142857
186	114461	H1FX				Not druggable	ENSP00000329662	Proteome	-2.25853	Melanocytes	-0.1
187	112876	TF	DB00515;DB00677;DB01370;DB01592;DB01593;DB06757;DB09130;DB14487;DB14488;DB14489;DB14490;DB14491;DB14501;DB14517;DB14518;DB14533	Cisplatin;Isoflurophate;Aluminium;Iron;Zinc;Manganese;Copper;Zinc acetate;Ferrous gluconate;Ferrous succinate;Ferrous ascorbate;Ferrous fumarate;Ferrous glycine sulfate;Aluminium phosphate;Aluminum acetate;Zinc chloride	0.25;0.333333333333333;0.25;0.0769230769230769;0.00806451612903226;0.2;0.00680272108843537;0.00806451612903226;0.0769230769230769;0.0769230769230769;0.0769230769230769;0.0769230769230769;0.0769230769230769;0.25;0.25;0.00806451612903226	Druggable	ENSP00000385834	Proteome	3.27663	FFPE_129	0.142857
188	112934	TIMP3				Not druggable	ENSP00000266085	Proteome	3.43598	PDX_129	-0.1
189	110107	LAMB2				Not druggable	ENSP00000307156	Proteome	2.61775	PDX_129	0.142857
190	110295	MAN2A2				Not druggable	ENSP00000353655	Proteome	3.4314	PDX_129	-0.1
191	110354	DNAJB9				Not druggable	ENSP00000249356	Proteome	2.36156	PDX_129	-0.1
192	113596	PXDN				Not druggable	ENSP00000252804	Proteome	-3.11273	Melanocytes	-0.1
193	115790	LEPREL2	DB00126;DB00139;DB00172	Ascorbic acid;Succinic acid;Proline	0.04;0.0384615384615385;0.0454545454545455	Druggable	ENSP00000478600	Proteome	-2.50573	Melanocytes	0.142857
194	124987	CCDC102A				Not druggable	ENSP00000258214	Proteome	2.75817	FFPE_129	0.142857
195	112698	SUPT6H				Not druggable	ENSP00000319104	Proteome	-6.5382	Melanocytes	-0.1
196	108336	ENDOG				Not druggable	ENSP00000361725	Proteome	-3.65384	Melanocytes	0.428571
197	118809	DBNL				Not druggable	ENSP00000411701	Phospho	-7.53116	Melanocytes	-0.1
198	124542	DIXDC1				Not druggable	ENSP00000394352	Proteome	-5.49508	Melanocytes	-0.1
199	113574	LUZP1				Not druggable	ENSP00000393460	Proteome	-2.69657	Melanocytes	-0.1
200	106530	SERPINA3	DB01593;DB14487;DB14533	Zinc;Zinc acetate;Zinc chloride	0.00806451612903226;0.00806451612903226;0.00806451612903226	Druggable	ENSP00000376793	Proteome	5.30667	FFPE_129	-0.1

## Sheet: Sheet 5
Patient-specific drugs prediction
DrugBank ID	DrugBank name	targets	Specificity	Patient	Cumulative degree	Target_count	Count in cohort	Used in cancer	Used in melanoma
DB00028	Immune Globulin Human	C5	0.0909091	111	2	1	1
DB00030	Insulin Human	SYTL4;INSR	0.0833333	129	10	2	1
DB00046	Insulin Lispro	INSR	0.5	129	7	1	1
DB00047	Insulin Glargine	INSR	0.5	129	7	1	1
DB00054	Abciximab	ITGB3	0.0714286	110	5	1	2
DB00054	Abciximab	ITGB3	0.0714286	129	9	1	2
DB00061	Pegademase bovine	GRB2	1	101	36	1	1
DB00063	Eptifibatide	ITGB3	1	110	5	1	2
DB00063	Eptifibatide	ITGB3	1	129	9	1	2
DB00071	Insulin Pork	SYTL4;INSR	0.0714286	129	10	2	1
DB00098	Antithymocyte immunoglobulin (rabbit)	ITGB3	0.111111	110	5	1	2
DB00098	Antithymocyte immunoglobulin (rabbit)	ITGB3	0.111111	129	9	1	2
DB00102	Becaplermin	A2M	0.333333	110	2	1	2
DB00102	Becaplermin	A2M	0.333333	111	2	1	2
DB00108	Natalizumab	ICAM1	0.0833333	101	13	1	3
DB00108	Natalizumab	ICAM1	0.0833333	110	12	1	3
DB00108	Natalizumab	ICAM1	0.0833333	129	14	1	3
DB00112	Bevacizumab	VEGFA	0.0909091	110	6	1	1	+
DB00119	Pyruvic acid	PKM	0.0714286	101	12	1	1
DB00131	Adenosine phosphate	FBP1	0.0666667	129	5	1	1
DB00143	Glutathione	GSTM3;GSTM4	0.0238095	111	4	2	1
DB00157	NADH	DLD;ALDH2	0.00694444	101	16	2	2
DB00157	NADH	ALDH3B2;ALDH3B1	0.00694444	111	3	2	2
DB00159	Icosapent	PTGS2	0.0909091	110	4	1	1
DB00163	Vitamin E	PPP2CB	0.1	129	3	1	1
DB00170	Menadione	NQO1	0.0769231	111	2	1	1
DB00201	Caffeine	ITPR1	0.0909091	101	3	1	3
DB00201	Caffeine	ITPR1	0.0909091	110	3	1	3
DB00201	Caffeine	ATM	0.0909091	129	10	1	3
DB00210	Adapalene	PTGS2	0.142857	110	4	1	1
DB00233	Aminosalicylic Acid	PTGS2	0.2	110	4	1	1
DB00244	Mesalazine	PTGS2	0.125	110	4	1	1
DB00254	Doxycycline	B2M	0.25	101	4	1	1
DB00266	Dicoumarol	NQO1	0.333333	111	2	1	1
DB00290	Bleomycin	LIG1	0.5	101	2	1	1	+
DB00316	Acetaminophen	PTGS2	0.2	110	4	1	1
DB00328	Indometacin	PTGS2	0.111111	110	4	1	1
DB00358	Mefloquine	HBA2	0.5	111	3	1	1
DB00398	Sorafenib	RAF1;KIT	0.1	111	19	2	2	+
DB00398	Sorafenib	PDGFRB	0.1	129	6	1	2	+
DB00461	Nabumetone	PTGS2	0.5	110	4	1	1
DB00465	Ketorolac	PTGS2	0.5	110	4	1	1
DB00469	Tenoxicam	PTGS2	0.5	110	4	1	1
DB00480	Lenalidomide	PTGS2	0.25	110	4	1	1	+
DB00482	Celecoxib	PTGS2	0.142857	110	4	1	1
DB00500	Tolmetin	PTGS2	0.5	110	4	1	1
DB00515	Cisplatin	A2M	0.25	110	2	1	3	+	+
DB00515	Cisplatin	A2M	0.25	111	2	1	3	+	+
DB00515	Cisplatin	A2M;TF	0.25	129	7	2	3	+	+
DB00523	Alitretinoin	IGFBP3	0.111111	129	2	1	1
DB00533	Rofecoxib	PTGS2	0.5	110	4	1	1
DB00536	Guanidine	ALDH2	0.142857	101	1	1	1
DB00554	Piroxicam	PTGS2	0.5	110	4	1	1
DB00573	Fenoprofen	PTGS2	0.25	110	4	1	1
DB00580	Valdecoxib	PTGS2	0.333333	110	4	1	1
DB00586	Diclofenac	PTGS2	0.125	110	4	1	1
DB00588	Fluticasone propionate	PLA2G4A	0.25	110	8	1	2
DB00588	Fluticasone propionate	PLA2G4A	0.25	129	4	1	2
DB00619	Imatinib	KIT	0.111111	111	3	1	2	+	+
DB00619	Imatinib	PDGFRB	0.111111	129	6	1	2	+	+
DB00626	Bacitracin	A2M	0.5	110	2	1	3
DB00626	Bacitracin	A2M	0.5	111	2	1	3
DB00626	Bacitracin	A2M	0.5	129	4	1	3
DB00641	Simvastatin	ITGB2	0.333333	101	7	1	3
DB00641	Simvastatin	ITGB2	0.333333	110	6	1	3
DB00641	Simvastatin	ITGB2	0.333333	129	7	1	3
DB00675	Tamoxifen	PRKCD	0.111111	101	12	1	2	+
DB00675	Tamoxifen	PRKCD;PRKCE	0.111111	110	16	2	2	+
DB00677	Isoflurophate	TF	0.333333	129	3	1	1
DB00712	Flurbiprofen	PTGS2	0.5	110	4	1	1
DB00749	Etodolac	PTGS2	0.333333	110	4	1	1
DB00768	Olopatadine	S100A1	0.166667	110	3	1	2
DB00768	Olopatadine	S100A1	0.166667	129	3	1	2
DB00775	Tirofiban	ITGB3	0.5	110	5	1	2
DB00775	Tirofiban	ITGB3	0.5	129	9	1	2
DB00784	Mefenamic acid	PTGS2	0.5	110	4	1	1
DB00788	Naproxen	PTGS2	0.333333	110	4	1	1
DB00795	Sulfasalazine	PTGS2	0.1	110	4	1	1
DB00812	Phenylbutazone	PTGS2	0.333333	110	4	1	1
DB00814	Meloxicam	PTGS2	0.5	110	4	1	1
DB00821	Carprofen	PTGS2	0.5	110	4	1	1
DB00822	Disulfiram	ALDH2	0.5	101	1	1	1
DB00831	Trifluoperazine	S100A4	0.166667	101	2	1	3
DB00831	Trifluoperazine	S100A4	0.166667	110	4	1	3
DB00831	Trifluoperazine	S100A4	0.166667	129	3	1	3
DB00861	Diflunisal	PTGS2	0.5	110	4	1	1
DB00870	Suprofen	PTGS2	0.5	110	4	1	1
DB00893	Iron Dextran	FTH1;FTL	0.25	101	11	2	4
DB00893	Iron Dextran	FTH1;FTL	0.25	110	8	2	4
DB00893	Iron Dextran	FTH1;FTL;HBA2;HBB	0.25	111	14	4	4
DB00893	Iron Dextran	FTH1;FTL	0.25	129	11	2	4
DB00936	Salicylic acid	PTGS2	0.333333	110	4	1	1
DB00939	Meclofenamic acid	PTGS2	0.2	110	4	1	1
DB00963	Bromfenac	PTGS2	0.5	110	4	1	1
DB00991	Oxaprozin	PTGS2	0.5	110	4	1	1
DB01009	Ketoprofen	PTGS2	0.333333	110	4	1	1
DB01014	Balsalazide	PTGS2	0.25	110	4	1	1
DB01041	Thalidomide	PTGS2	0.166667	110	4	1	1
DB01050	Ibuprofen	PTGS2	0.1	110	4	1	1
DB01092	Ouabain	ATP1A2	0.333333	101	2	1	1
DB01097	Leflunomide	PTK2B	0.333333	101	13	1	1
DB01120	Gliclazide	VEGFA	0.5	110	6	1	1
DB01136	Carvedilol	VEGFA	0.0588235	110	6	1	1
DB01197	Captopril	MMP2	0.2	129	4	1	1
DB01254	Dasatinib	BTK;CSK	0.0434783	101	17	2	3	+
DB01254	Dasatinib	STAT5B	0.0434783	110	3	1	3	+
DB01254	Dasatinib	PDGFRB	0.0434783	129	6	1	3	+
DB01257	Eculizumab	C5	1	111	2	1	1
DB01268	Sunitinib	KIT	0.125	111	3	1	2	+
DB01268	Sunitinib	PDGFRB	0.125	129	6	1	2	+
DB01270	Ranibizumab	VEGFA	1	110	6	1	1
DB01277	Mecasermin	IGFBP3;INSR	0.25	129	9	2	1
DB01283	Lumiracoxib	PTGS2	0.5	110	4	1	1
DB01306	Insulin Aspart	INSR	1	129	7	1	1
DB01307	Insulin Detemir	INSR	1	129	7	1	1
DB01309	Insulin Glulisine	INSR	1	129	7	1	1
DB01370	Aluminium	TF	0.25	129	3	1	1
DB01373	Calcium	S100A9	0.05	110	10	1	3
DB01373	Calcium	PDCD6	0.05	111	11	1	3
DB01373	Calcium	S100A9	0.05	129	5	1	3
DB01397	Magnesium salicylate	PTGS2	0.5	110	4	1	1
DB01399	Salsalate	PTGS2	0.5	110	4	1	1
DB01401	Choline magnesium trisalicylate	PTGS2	0.5	110	4	1	1
DB01404	Ginseng	PTGS2	0.333333	110	4	1	1
DB01419	Antrafenine	PTGS2	0.5	110	4	1	1
DB01435	Antipyrine	PTGS2	0.5	110	4	1	1
DB01592	Iron	FTH1	0.0769231	101	8	1	4
DB01592	Iron	FTH1	0.0769231	110	5	1	4
DB01592	Iron	FTH1;HBA2	0.0769231	111	7	2	4
DB01592	Iron	FTH1;TF	0.0769231	129	10	2	4
DB01600	Tiaprofenic acid	PTGS2	0.5	110	4	1	1
DB01628	Etoricoxib	PTGS2	1	110	4	1	1
DB01839	Propylene glycol	F13A1	0.2	101	2	1	1
DB02266	Flufenamic Acid	PTGS2	0.166667	110	4	1	1
DB02709	Resveratrol	PTGS2;ITGB3	0.04	110	9	2	2
DB02709	Resveratrol	ITGB3	0.04	129	9	1	2
DB02772	Sucrose	ACTA1	0.0555556	110	5	1	1
DB03088	Pidolic Acid	VEGFA	0.0588235	110	6	1	1
DB03147	Flavin adenine dinucleotide	DLD;ERO1LB	0.0116279	101	17	2	2
DB03147	Flavin adenine dinucleotide	NQO1	0.0116279	111	2	1	2
DB03754	Tromethamine	DCN	0.0769231	101	2	1	4
DB03754	Tromethamine	VEGFA	0.0769231	110	6	1	4
DB03754	Tromethamine	DCN	0.0769231	111	2	1	4
DB03754	Tromethamine	DCN	0.0769231	129	2	1	4
DB04465	Lactose	LGALS3	0.111111	111	14	1	1
DB04743	Nimesulide	PTGS2	0.333333	110	4	1	1
DB04868	Nilotinib	KIT	0.5	111	3	1	1	+
DB05013	Ingenol Mebutate	PRKCD	0.5	101	12	1	2
DB05013	Ingenol Mebutate	PRKCD	0.5	110	10	1	2
DB05260	Gallium nitrate	RRM2	0.2	111	7	1	1
DB05294	Vandetanib	EGFR;VEGFA	0.2	110	77	2	1	+
DB06154	Pentaerythritol tetranitrate	HBA2;HBB	0.5	111	8	2	1
DB06589	Pazopanib	KIT	0.1	111	3	1	2	+
DB06589	Pazopanib	PDGFRB	0.1	129	6	1	2	+
DB06595	Midostaurin	KIT	0.166667	111	3	1	2	+
DB06595	Midostaurin	PDGFRB	0.166667	129	6	1	2	+
DB06616	Bosutinib	MAP2K2	0.1	110	6	1	2	+
DB06616	Bosutinib	CDK2;MAP2K2	0.1	111	43	2	2	+
DB06725	Lornoxicam	PTGS2	0.5	110	4	1	1
DB06736	Aceclofenac	PTGS2	0.5	110	4	1	1
DB06757	Manganese	TF	0.2	129	3	1	1
DB06779	Dalteparin	VEGFA	0.25	110	6	1	1	+
DB06802	Nepafenac	PTGS2	0.5	110	4	1	1
DB08439	Parecoxib	PTGS2	0.5	110	4	1	1
DB08818	Hyaluronic acid	ICAM1	0.0666667	101	13	1	2
DB08818	Hyaluronic acid	ICAM1	0.0666667	129	14	1	2
DB08862	Cholecystokinin	RAF1	0.166667	111	16	1	1
DB08885	Aflibercept	VEGFA	0.333333	110	6	1	1	+
DB08888	Ocriplasmin	A2M	0.333333	110	2	1	1
DB08896	Regorafenib	PDGFRB	0.0555556	129	6	1	1	+
DB08901	Ponatinib	KIT	0.0666667	111	3	1	1	+
DB08910	Pomalidomide	PTGS2	0.333333	110	4	1	1	+
DB08911	Trametinib	MAP2K2	0.5	110	6	1	2	+	+
DB08911	Trametinib	MAP2K2	0.5	111	4	1	2	+	+
DB08912	Dabrafenib	LIMK1	0.2	101	4	1	2	+	+
DB08912	Dabrafenib	RAF1	0.2	111	16	1	2	+	+
DB09053	Ibrutinib	BTK	1	101	9	1	1	+
DB09078	Lenvatinib	KIT	0.125	111	3	1	1	+
DB09103	Ancestim	KIT	1	111	3	1	1
DB09112	Nitrous acid	HBA2;HBB	0.333333	111	8	2	1
DB09116	Calcium carbimide	ALDH3B2	1	111	1	1	1
DB09129	Chromic chloride	INSR	1	129	7	1	1
DB09140	Oxygen	HBA2;HBB	0.25	111	8	2	1
DB09146	Iron saccharate	HBA2	1	111	3	1	1
DB09213	Dexibuprofen	PTGS2	0.0833333	110	4	1	1
DB09214	Dexketoprofen	PTGS2	0.5	110	4	1	1
DB09216	Tolfenamic Acid	PTGS2	0.5	110	4	1	1
DB09301	Chondroitin sulfate	VEGFA	0.25	110	6	1	1
DB09310	Coagulation Factor XIII A-Subunit (Recombinant)	F13B	1	101	1	1	1
DB09462	Glycerin	ITPR1	0.04	101	3	1	2
DB09462	Glycerin	ITPR1	0.04	110	3	1	2
DB09517	Sodium ferric gluconate complex	FTL	0.333333	101	3	1	4
DB09517	Sodium ferric gluconate complex	FTL	0.333333	110	3	1	4
DB09517	Sodium ferric gluconate complex	FTL;HBA2;HBB	0.333333	111	10	3	4
DB09517	Sodium ferric gluconate complex	FTL	0.333333	129	4	1	4
DB09564	Insulin Degludec	INSR	1	129	7	1	1
DB10770	Foreskin fibroblast (neonatal)	PDGFRB	0.0909091	129	6	1	1
DB11071	Phenyl salicylate	PTGS2	0.5	110	4	1	1
DB11079	Trolamine salicylate	PTGS2	0.5	110	4	1	1
DB11201	Menthyl salicylate	PTGS2	0.5	110	4	1	1
DB11294	Coccidioides immitis spherule	HLA-A	0.333333	101	6	1	1
DB11311	Prothrombin	F13A1	0.25	101	2	1	1
DB11323	Glycol salicylate	PTGS2	0.5	110	4	1	1
DB11327	Dipyrithione	PTGS2	0.5	110	4	1	1
DB11703	Acalabrutinib	BTK	1	101	9	1	1	+
DB11817	Baricitinib	PTK2B	0.25	101	13	1	1
DB11967	Binimetinib	MAP2K2	0.2	110	6	1	2	+	+
DB11967	Binimetinib	MAP2K2	0.2	111	4	1	2	+	+
DB12965	Silver	A2M	0.25	110	2	1	3
DB12965	Silver	A2M	0.25	111	2	1	3
DB12965	Silver	A2M	0.25	129	4	1	3
DB13151	Anti-inhibitor coagulant complex	F13A1	0.125	101	2	1	1
DB13167	Alclofenac	PTGS2	1	110	4	1	1
DB13346	Bufexamac	PTGS2	0.25	110	4	1	1
DB13501	Bendazac	PTGS2	0.5	110	4	1	1
DB13783	Acemetacin	PTGS2	0.5	110	4	1	1
DB13961	Fish oil	PTGS2	0.111111	110	4	1	1
DB13995	Ferric pyrophosphate citrate	FTH1;FTL	0.25	101	11	2	4
DB13995	Ferric pyrophosphate citrate	FTH1;FTL	0.25	110	8	2	4
DB13995	Ferric pyrophosphate citrate	FTH1;FTL;HBA2;HBB	0.25	111	14	4	4
DB13995	Ferric pyrophosphate citrate	FTH1;FTL	0.25	129	11	2	4
DB14001	alpha-Tocopherol succinate	PPP2CB	0.1	129	3	1	1
DB14002	D-alpha-Tocopherol acetate	PPP2CB	0.1	129	3	1	1
DB14488	Ferrous gluconate	FTH1	0.0769231	101	8	1	4
DB14488	Ferrous gluconate	FTH1	0.0769231	110	5	1	4
DB14488	Ferrous gluconate	FTH1;HBA2	0.0769231	111	7	2	4
DB14488	Ferrous gluconate	FTH1;TF	0.0769231	129	10	2	4
DB14489	Ferrous succinate	FTH1	0.0769231	101	8	1	4
DB14489	Ferrous succinate	FTH1	0.0769231	110	5	1	4
DB14489	Ferrous succinate	FTH1;HBA2	0.0769231	111	7	2	4
DB14489	Ferrous succinate	FTH1;TF	0.0769231	129	10	2	4
DB14490	Ferrous ascorbate	FTH1	0.0769231	101	8	1	4
DB14490	Ferrous ascorbate	FTH1	0.0769231	110	5	1	4
DB14490	Ferrous ascorbate	FTH1;HBA2	0.0769231	111	7	2	4
DB14490	Ferrous ascorbate	FTH1;TF	0.0769231	129	10	2	4
DB14491	Ferrous fumarate	FTH1	0.0769231	101	8	1	4
DB14491	Ferrous fumarate	FTH1	0.0769231	110	5	1	4
DB14491	Ferrous fumarate	FTH1;HBA2	0.0769231	111	7	2	4
DB14491	Ferrous fumarate	FTH1;TF	0.0769231	129	10	2	4
DB14501	Ferrous glycine sulfate	FTH1	0.0769231	101	8	1	4
DB14501	Ferrous glycine sulfate	FTH1	0.0769231	110	5	1	4
DB14501	Ferrous glycine sulfate	FTH1;HBA2	0.0769231	111	7	2	4
DB14501	Ferrous glycine sulfate	FTH1;TF	0.0769231	129	10	2	4
DB14517	Aluminium phosphate	TF	0.25	129	3	1	1
DB14518	Aluminum acetate	TF	0.25	129	3	1	1
