# Supplementary material for: Individualized Proteogenomics Reveals the Mutational Landscape of Melanoma Patients in Response to Immunotherapy
Source: Cancers (Basel). 2021 Oct 28;13(21):5411. doi: 10.3390/cancers13215411 (PMC8582461; doi:10.3390/cancers13215411)
Supplement: Supplementary file 1 [file cancers-13-05411-s001.zip › cancers-1421686 Table S4.xlsx]

## Sheet: Legend
Differential protein expression between naïve and ICi-treated patients
Table	Description
Sheet 0	Column descriptions for Sheet 1-Sheet 3
Sheet 1	All proteins ICi-treated versus naïve patients
Sheet 2	Over-representation analysis ICi-treated versus naïve patients
Sheet 3	Interaction network of omics significantly changing entries for comparison between ICi-treated and naïve patients

## Sheet: Sheet 0
Sheet 1	All proteins ICi-treated versus naïve patients
Column	Description
id	The id of the protein groups within the MaxQuant processing
Protein IDs	The protein ids belonging to protein groups
Majority protein IDs	The main protein ids based on unique peptide per protein group
Protein names	The protein(s) name
Gene names	The gene(s) name
MutationIDs	The mutated protein isoform id(s) if any exists
Best coverage type	The best mutated isoform identification (e.g. reference, alternate)
log 10 intensity [sample group]	The quantification intensities (log10) for each group of samples
log 2 ratio ICi-treated_x/y_naive	The quantification ratio (log2) between two sample groups
log10 intensity ICi-treated+naive	The summed quantification (log10) of two sample groups
ICi- treated_x/y_naive Significance B	The p-value obtained from significance B statistical analysis (-log10)
ICi- treated_x/y_naive B significant	Protein groups identified as significantly changing between two sample groups are marked with "+"
KEGG name	KEGG signaling pathways annotated with the current protein group
Reactome name	Reactome signaling pathways annotated with the current protein group
Peptide counts (all)	The number of peptides associated with the current protein group
Peptide counts (razor+unique)	The number of razor and unique peptides associated with the current protein group
Peptide counts (unique)	The number of unique peptides associated with the current protein group
Sheet 2	Over-representation analysis ICi-treated versus naïve patients
Column	Description
Selection column	The selected entries tested for overrepresentation
Category column	The database used to retrieve functions/pathways
Category value	The overrepresented function/pathway name
Total size	The total size of the identified entries (e.g. variants, transcripts, proteins)
Selection size	The selection size (e.g. number upregulated entries, number downregulated entries)
Category size	The total size of entries within the function/pathway
Intersection size	The number of entries within selection that belong to the function/pathway
Enrichment factor	The enrichment factor (above 1 means overrepresented, below 1 means underrepresented)
P value	The fisher exact test p-value
Benj. Hoch. FDR	The multiple test correction with benjamini-hochberg
Sheet 3	Interaction network of omics significantly changing entries for comparison between ICi-treated and naïve patients
Column	Description
ID	The network node id
biogrid	The network node BioGRID id
label	The network node BioGRID gene name
DrugBank ID	The network node can be targeted by the(se) drug(s) id based on DrugBank database
DrugBank name	The network node can be targeted by the(se) drug(s) name(s) based on DrugBank database
Specificity	The reported drug(s) have the following specificity to the target node
Druggable	Whether the network node can be targeted by at least one drug
CrossDB ID	The protein ID in either Ensembl or UniProt
Change in abundance	The node was identified (or not) with a change in abundance between ICi-treated and naïve patients
Phosphorylated	Whether the network node was identified phosphorylated (anywhere along the sequence)
Reactome	The network node is associated with a list of Reactome signalling pathway

## Sheet: Sheet 1
All proteins ICi-treated versus naïve patients
id	Protein IDs	Majority protein IDs	Protein names	Gene names	MutationIDs	Best coverage type	log 10 intensity naive	log10 intensity ICi-treated	log 2 ratio ICi-treated_x/y_naive	log10 intensity ICi-treated+naive	ICi- treated_x/y_naive Significance B	ICi- treated_x/y_naive B significant	KEGG name	Reactome name	Peptide counts (all)	Peptide counts (razor+unique)	Peptide counts (unique)
9	ENSP00000492425;ENSP00000338352;A0A024RBG1;Q9NZJ9-2;ENSP00000448032;Q9NZJ9-3	ENSP00000492425;ENSP00000338352;A0A024RBG1;Q9NZJ9-2;ENSP00000448032;Q9NZJ9-3	Diphosphoinositol polyphosphate phosphohydrolase 2	NUDT4		Unspecific	8.2555	6.51895	-5.76869	8.2634	0.000327285	+		Inositol phosphate metabolism;Metabolism;Synthesis of pyrophosphates in the cytosol	10;10;10;10;6;6	1;1;1;1;1;1	1;1;1;1;1;1
147	ENSP00000479870;A0A087WW23;ENSP00000369858;P20292;ENSP00000479870_p.A40CfsX15;ENSP00000479870_p.A40WfsX23	ENSP00000479870;A0A087WW23;ENSP00000369858;P20292	Arachidonate 5-lipoxygenase-activating protein	ALOX5AP	ENSP00000479870_p.A40CfsX15;ENSP00000479870_p.A40WfsX23;;;;ENSP00000479870_p.A40CfsX15;ENSP00000479870_p.A40WfsX23	Ref	9.10855	8.15655	-3.16249	9.15454	0.000519426	+	Fc epsilon RI signaling pathway	Arachidonic acid metabolism;Biosynthesis of specialized proresolving mediators (SPMs);Fatty acid metabolism;Metabolism;Metabolism of lipids;Synthesis of 5-eicosatetraenoic acids;Synthesis of Leukotrienes (LT) and Eoxins (EX);Synthesis of Lipoxins (LX)	6;6;5;5;1;1	6;6;5;5;1;1	2;2;1;1;1;1
178	ENSP00000481104;A0A087WXK4;ENSP00000376335;ENSP00000376334;ENSP00000295500;Q7Z3F1;A2AWR2;A2AWR3;F6Z6G4	ENSP00000481104;A0A087WXK4;ENSP00000376335;ENSP00000376334;ENSP00000295500;Q7Z3F1;A2AWR2;A2AWR3	Integral membrane protein GPR155	GPR155;Gpr155		Unspecific	6.83391	8.38768	5.1615	8.39964	0.00120843	+			16;16;16;16;16;16;9;9;3	16;16;16;16;16;16;9;9;3	16;16;16;16;16;16;9;9;3
229	ENSP00000483630_p.S888L;ENSP00000483630_p.R848H;ENSP00000483630;A0A087X0S5;LRG_475p1_p.S890L;LRG_475p1_p.R850H;LRG_475p1;ENSP00000355180_p.S890L;ENSP00000355180_p.R850H;ENSP00000355180;P12109;ENSP00000483630_p.S116N;LRG_475p1_p.S116N;ENSP00000355180_p.S116N	ENSP00000483630_p.S888L;ENSP00000483630_p.R848H;ENSP00000483630;A0A087X0S5;LRG_475p1_p.S890L;LRG_475p1_p.R850H;LRG_475p1;ENSP00000355180_p.S890L;ENSP00000355180_p.R850H;ENSP00000355180;P12109;ENSP00000483630_p.S116N;LRG_475p1_p.S116N;ENSP00000355180_p.S116N	Collagen alpha-1(VI) chain	COL6A1	ENSP00000483630_p.S888L;ENSP00000483630_p.R848H;ENSP00000483630_p.S116N;ENSP00000483630_p.S888L;ENSP00000483630_p.R848H;;LRG_475p1_p.S890L;LRG_475p1_p.R850H;LRG_475p1_p.S116N;LRG_475p1_p.S890L;LRG_475p1_p.R850H;ENSP00000355180_p.S890L;ENSP00000355180_p.R850H;ENSP00000355180_p.S116N;ENSP00000355180_p.S890L;ENSP00000355180_p.R850H;;ENSP00000483630_p.S116N;LRG_475p1_p.S116N;ENSP00000355180_p.S116N	Ref	10.3723	9.6198	-2.49979	10.443	0.000116852	+	ECM-receptor interaction;Focal adhesion;Human papillomavirus infection;PI3K-Akt signaling pathway;Protein digestion and absorption	Assembly of collagen fibrils and other multimeric structures;Axon guidance;Collagen biosynthesis and modifying enzymes;Collagen chain trimerization;Collagen degradation;Collagen formation;Degradation of the extracellular matrix;Developmental Biology;ECM proteoglycans;Extracellular matrix organization;Integrin cell surface interactions;NCAM signaling for neurite out-growth;NCAM1 interactions;Signa…	67;67;67;67;67;67;67;67;67;67;67;66;66;66	67;67;67;67;67;67;67;67;67;67;67;66;66;66	47;47;47;47;47;47;47;47;47;47;47;46;46;46
232	ENSP00000342278;ENSP00000342278_p.721X;ENSP00000483679;A0A087X0V5;P29728	ENSP00000342278;ENSP00000342278_p.721X;ENSP00000483679;A0A087X0V5;P29728	2-5-oligoadenylate synthase 2	OAS2	ENSP00000342278_p.R650C;ENSP00000342278_p.721X;ENSP00000342278_p.721X;ENSP00000483679_p.R650C;;	Alt+Ref	9.37771	8.08753	-4.28586	9.39942	1.1058e-07	+	Epstein-Barr virus infection;Hepatitis C;Herpes simplex virus 1 infection;Influenza A;Measles;NOD-like receptor signaling pathway	Antiviral mechanism by IFN-stimulated genes;Cytokine Signaling in Immune system;Immune System;Interferon alpha/beta signaling;Interferon gamma signaling;Interferon Signaling;OAS antiviral response	38;38;38;38;38	38;38;38;38;38	0;0;0;0;0
238	ENSP00000483983;ENSP00000498807;A0A087X188;Q9UBW5;ENSP00000445874;Q9UBW5-3;ENSP00000410217;Q9UBW5-2	ENSP00000483983;ENSP00000498807;A0A087X188;Q9UBW5;ENSP00000445874;Q9UBW5-3;ENSP00000410217;Q9UBW5-2	Bridging integrator 2	BIN2	ENSP00000483983_p.N529D;ENSP00000498807_p.N561D;;;ENSP00000445874_p.N503D;;ENSP00000410217_p.N497D;	Alt+Ref	8.95738	8.01215	-3.14001	9.00405	0.000662182	+	African trypanosomiasis;Allograft rejection;alpha-Linolenic acid metabolism;Aminoacyl-tRNA biosynthesis;Amoebiasis;Antigen processing and presentation;Arachidonic acid metabolism;Arginine and proline metabolism;Asthma;Autoimmune thyroid disease;B cell receptor signaling pathway;beta-Alanine metabolism;Calcium signaling pathway;Cell adhesion molecules (CAMs);Chemical carcinogenesis;Cholesterol met…	Immune System;Innate Immune System;Neutrophil degranulation	25;25;25;25;24;24;23;23	23;23;23;23;22;22;21;21	1;1;1;1;1;1;1;1
286	ENSP00000248437;A0A0A0MQA5;P68368;P68366;ENSP00000375938;P68366-2;ENSP00000248437_p.R214H;ENSP00000375938_p.R199H;ENSP00000416992;C9JJQ8;ENSP00000396061;C9JEV8;ENSP00000408194;C9JQ00;A0A087WQS4;ENSP00000404740;C9JDL2;A0A087WRB4;A0A087WSB0;A0A087WS35	ENSP00000248437;A0A0A0MQA5;P68368;P68366;ENSP00000375938;P68366-2;ENSP00000248437_p.R214H;ENSP00000375938_p.R199H	Tubulin alpha-4A chain	Tuba4a;TUBA4A	ENSP00000248437_p.R214H;;;;ENSP00000375938_p.R199H;;ENSP00000248437_p.R214H;ENSP00000375938_p.R199H;;;;;;;;;;;;	Unspecific	9.54808	8.22837	-4.38397	9.5684	5.97618e-12	+	Apoptosis;Gap junction;Pathogenic Escherichia coli infection;Phagosome;Tight junction	Activation of AMPK downstream of NMDARs;Activation of NMDA receptors and postsynaptic events;Adaptive Immune System;Anchoring of the basal body to the plasma membrane;Asparagine N-linked glycosylation;Assembly and cell surface presentation of NMDA receptors;AURKA Activation by TPX2;Axon guidance;Carboxyterminal post-translational modifications of tubulin;Cell Cycle;Cell Cycle, Mitotic;Cellular re…	39;39;39;39;38;38;37;36;13;13;12;12;12;12;10;9;9;8;4;2	7;7;7;7;6;6;7;6;6;6;5;5;5;5;5;4;4;3;3;2	4;4;4;4;3;3;4;3;3;3;2;2;2;2;2;1;1;0;0;1
361	ENSP00000485743_p.P731L;ENSP00000485743;ENSP00000384453_p.P731L;ENSP00000384453;A0A0A0MSC0;Q9NR82-2;F8WEA4;ENSP00000359425_p.P740L;ENSP00000359425;ENSP00000347326_p.P740L;ENSP00000347326;ENSP00000385501_p.P750L;ENSP00000385501;A0A0A0MSD9;ENSP00000347853_p.P759L;ENSP00000347853;ENSP00000345055_p.P759L;ENSP00000345055;A0A0A0MRC8;Q9NR82;Q9NR82-7;Q9NR82-3;Q9NR82-6;ENSP00000486187_p.P630L;ENSP00000486…	ENSP00000485743_p.P731L;ENSP00000485743;ENSP00000384453_p.P731L;ENSP00000384453;A0A0A0MSC0;Q9NR82-2;F8WEA4;ENSP00000359425_p.P740L;ENSP00000359425;ENSP00000347326_p.P740L;ENSP00000347326;ENSP00000385501_p.P750L;ENSP00000385501;A0A0A0MSD9;ENSP00000347853_p.P759L;ENSP00000347853;ENSP00000345055_p.P759L;ENSP00000345055;A0A0A0MRC8;Q9NR82;Q9NR82-7;Q9NR82-3;Q9NR82-6;ENSP00000486187_p.P630L;ENSP00000486…	Potassium voltage-gated channel subfamily KQT member 5	KCNQ5;Kcnq5	ENSP00000485743_p.P731L;ENSP00000485743_p.P731L;ENSP00000384453_p.P731L;ENSP00000384453_p.P731L;;;;ENSP00000359425_p.P740L;ENSP00000359425_p.P740L;ENSP00000347326_p.P740L;ENSP00000347326_p.P740L;ENSP00000385501_p.P750L;ENSP00000385501_p.P750L;;ENSP00000347853_p.P759L;ENSP00000347853_p.P759L;ENSP00000345055_p.P759L;ENSP00000345055_p.P759L;;;;;;ENSP00000486187_p.P630L;ENSP00000486187_p.P630L;ENSP00…	Unspecific	5.95	8.21241	7.51558	8.21478	3.20559e-07	+	Cholinergic synapse	Neuronal System;Potassium Channels;Voltage gated Potassium channels	23;23;23;23;23;23;21;21;21;21;21;21;21;21;21;21;21;21;21;21;21;21;21;17;17;17;17;17;17;12;10;10;8;8;7;4;3;3;1;1;1;1;1;1;1	23;23;23;23;23;23;21;21;21;21;21;21;21;21;21;21;21;21;21;21;21;21;21;17;17;17;17;17;17;12;10;10;8;8;7;4;3;3;1;1;1;1;1;1;1	22;22;22;22;22;22;20;20;20;20;20;20;20;20;20;20;20;20;20;20;20;20;20;17;17;17;17;17;17;11;9;9;8;8;7;4;2;2;0;0;0;0;0;0;0
401	ENSP00000441637_p.T463M;ENSP00000441637_p.S1P;ENSP00000441637;A0A0A0MTJ5;ENSP00000360120_p.T518M;ENSP00000360120_p.S56P;ENSP00000360120;Q01973;ENSP00000441637_p.N675K;ENSP00000360120_p.N730K;ENSP00000360121_p.S56P;ENSP00000360121;Q01973-3;Q01973-2	ENSP00000441637_p.T463M;ENSP00000441637_p.S1P;ENSP00000441637;A0A0A0MTJ5;ENSP00000360120_p.T518M;ENSP00000360120_p.S56P;ENSP00000360120;Q01973;ENSP00000441637_p.N675K;ENSP00000360120_p.N730K	Tyrosine-protein kinase transmembrane receptor ROR1	ROR1	ENSP00000441637_p.T463M;ENSP00000441637_p.S1P;ENSP00000441637_p.N675K;ENSP00000441637_p.T463M;ENSP00000441637_p.S1P;;ENSP00000360120_p.T518M;ENSP00000360120_p.S56P;ENSP00000360120_p.N730K;ENSP00000360120_p.T518M;ENSP00000360120_p.S56P;;ENSP00000441637_p.N675K;ENSP00000360120_p.N730K;ENSP00000360121_p.S56P;ENSP00000360121_p.S56P;;	Ref	6.49925	8.11147	5.35565	8.12194	0.000637082	+	Wnt signaling pathway	Beta-catenin independent WNT signaling;PCP/CE pathway;Signal Transduction;Signaling by WNT;WNT5A-dependent internalization of FZD2, FZD5 and ROR2	20;20;20;20;20;20;20;20;19;19;9;9;9;7	20;20;20;20;20;20;20;20;19;19;9;9;9;7	4;4;4;4;4;4;4;4;4;4;1;1;1;2
526	ENSP00000482721;A0A0C4DGY3;ENSP00000370031;ENSP00000339486;ENSP00000482306;ENSP00000337653;A0A0C4DGX9;Q8TAM2-4;ENSP00000445067;ENSP00000298324;A0A0C4DGH8;Q8TAM2;Q8TAM2-3;ENSP00000452354;H0YJX0;ENSP00000351439;A0A0C4DFT4;G3V2Z9;ENSP00000450951;G3V324;ENSP00000450993;ENSP00000346427;ENSP00000451955;H0YJQ3;Q8TAM2-2;Q8TAM2-6	ENSP00000482721;A0A0C4DGY3;ENSP00000370031;ENSP00000339486;ENSP00000482306;ENSP00000337653;A0A0C4DGX9;Q8TAM2-4;ENSP00000445067;ENSP00000298324;A0A0C4DGH8;Q8TAM2;Q8TAM2-3;ENSP00000452354;H0YJX0;ENSP00000351439;A0A0C4DFT4	Tetratricopeptide repeat protein 8	TTC8		Unspecific	6.37128	8.49687	7.06107	8.50012	3.29829e-07	+		BBSome-mediated cargo-targeting to cilium;Cargo trafficking to the periciliary membrane;Cilium Assembly;Organelle biogenesis and maintenance	16;16;15;15;15;15;15;15;14;14;14;14;13;12;12;9;9;5;5;5;5;5;5;5;5;4	16;16;15;15;15;15;15;15;14;14;14;14;13;12;12;9;9;5;5;5;5;5;5;5;5;4	9;9;9;9;8;8;8;9;8;8;8;8;8;6;6;5;5;2;2;2;2;4;2;2;4;2
580	A0A0G2JFH2	A0A0G2JFH2				Unspecific	9.6592	8.30237	-4.50729	9.67789	2.14021e-09	+			102	95	65
610	A0A0G2JIF2;A0A0G2JL56;A0A0G2JI36;A0A1W2PSE7;Q31611;ENSP00000436375;ENSP00000366014;A0A0G2JNX1;P17693-6;P17693-2	A0A0G2JIF2;A0A0G2JL56;A0A0G2JI36;A0A1W2PSE7				Unspecific	9.6058	8.57194	-3.43442	9.64422	3.2487e-06	+	Allograft rejection;Antigen processing and presentation;Autoimmune thyroid disease;Cell adhesion molecules (CAMs);Cellular senescence;Endocytosis;Epstein-Barr virus infection;Graft-versus-host disease;Herpes simplex virus 1 infection;Human cytomegalovirus infection;Human immunodeficiency virus 1 infection;Human papillomavirus infection;Human T-cell leukemia virus 1 infection;Kaposi sarcoma-associ…	Adaptive Immune System;Antigen Presentation: Folding, assembly and peptide loading of class I MHC;Antigen processing-Cross presentation;Class I MHC mediated antigen processing & presentation;Cytokine Signaling in Immune system;Endosomal/Vacuolar pathway;ER-Phagosome pathway;Immune System;Immunoregulatory interactions between a Lymphoid and a non-Lymphoid cell;Interferon alpha/beta signaling;Inter…	30;28;26;26;2;2;2;2;2;2	18;16;14;14;1;1;1;1;1;1	0;0;0;0;0;0;0;0;0;0
625	ENSP00000378786;A0A0G2JMH6;P01903;Q30118;ENSP00000364121;A0A0G2JH46;A0A494B9M4;P14439;P04224;P01904	ENSP00000378786;A0A0G2JMH6;P01903;Q30118;ENSP00000364121;A0A0G2JH46	HLA class II histocompatibility antigen, DR alpha chain	HLA-DRA		Unspecific	9.75443	6.36695	-11.2529	9.7546	8.71136e-47	+	Allograft rejection;Antigen processing and presentation;Asthma;Autoimmune thyroid disease;Cell adhesion molecules (CAMs);Epstein-Barr virus infection;Graft-versus-host disease;Hematopoietic cell lineage;Herpes simplex virus 1 infection;Human T-cell leukemia virus 1 infection;Inflammatory bowel disease (IBD);Influenza A;Intestinal immune network for IgA production;Leishmaniasis;Phagosome;Rheumatoi…	Adaptive Immune System;Costimulation by the CD28 family;Cytokine Signaling in Immune system;Downstream TCR signaling;Generation of second messenger molecules;Immune System;Interferon gamma signaling;Interferon Signaling;MHC class II antigen presentation;PD-1 signaling;Phosphorylation of CD3 and TCR zeta chains;TCR signaling;Translocation of ZAP-70 to Immunological synapse	13;13;13;11;11;11;1;1;1;1	13;13;13;11;11;11;1;1;1;1	12;12;12;10;10;10;1;1;1;1
635	ENSP00000366121_p.R412S;ENSP00000366121;ENSP00000403323_p.R753S;ENSP00000403323;A0A0G2JNY3;Q6ZUM4-2;Q6ZUM4;ENSP00000366121_p.S324I;ENSP00000403323_p.S665I;ENSP00000431591_p.R385S;ENSP00000431591;A0A0C4DGE6;Q6ZUM4-3;ENSP00000431591_p.S297I	ENSP00000366121_p.R412S;ENSP00000366121;ENSP00000403323_p.R753S;ENSP00000403323;A0A0G2JNY3;Q6ZUM4-2;Q6ZUM4;ENSP00000366121_p.S324I;ENSP00000403323_p.S665I;ENSP00000431591_p.R385S;ENSP00000431591;A0A0C4DGE6;Q6ZUM4-3;ENSP00000431591_p.S297I	Rho GTPase-activating protein 27	ARHGAP27	ENSP00000366121_p.R412S;ENSP00000366121_p.S324I;ENSP00000366121_p.R412S;ENSP00000403323_p.R753S;ENSP00000403323_p.E325X;ENSP00000403323_p.S665I;ENSP00000403323_p.R753S;;;;ENSP00000366121_p.S324I;ENSP00000403323_p.S665I;ENSP00000431591_p.R385S;ENSP00000431591_p.S297I;ENSP00000431591_p.R385S;;;ENSP00000431591_p.S297I	Ref	7.72156	5.52396	-7.30028	7.72431	0.000137258	+		Rho GTPase cycle;Signal Transduction;Signaling by Rho GTPases	18;18;18;18;18;18;18;17;17;15;15;15;15;14	13;13;13;13;13;13;13;12;12;10;10;10;10;9	1;1;1;1;1;1;1;1;1;1;1;1;1;1
728	A0A0R4IZW8;O88456;A0A0R4J1C2;ENSP00000400882;Q9D7J7;Q96L46	A0A0R4IZW8;O88456;A0A0R4J1C2	Calpain small subunit 1	Capns1		Unspecific	8.95364	7.1625	-5.95002	8.96061	5.93598e-10	+		Degradation of the extracellular matrix;Deregulated CDK5 triggers multiple neurodegenerative pathways in Alzheimer's disease models;Disease;Extracellular matrix organization;Neurodegenerative Diseases	18;17;14;3;3;3	7;6;6;1;1;1	7;6;6;1;1;1
871	A0A0R4J138;P50429;P50429-2;ENSP00000420955;D6RDH0	A0A0R4J138;P50429;P50429-2	Arylsulfatase B	Arsb		Unspecific	8.61676	6.61564	-6.64755	8.62107	1.32522e-08	+		Gamma carboxylation, hypusine formation and arylsulfatase activation;Glycosphingolipid metabolism;Metabolism;Metabolism of lipids;Metabolism of proteins;Post-translational protein modification;Sphingolipid metabolism;The activation of arylsulfatases	18;18;13;1;1	14;14;9;0;0	14;14;9;0;0
1051	A0A140T997;A0A140TA11;A0A140T9Y5;A0A140TA14	A0A140T997;A0A140TA11;A0A140T9Y5;A0A140TA14				Unspecific	9.36941	7.97056	-4.64689	9.38641	1.07686e-08	+			23;22;21;20	18;17;16;15	6;6;6;6
1055	O19617;A0A140T9H5;A0A140T921;A0A140T9U8;A0A140TA05;A0A140T9L3;ENSP00000492782;A0A1W2PRU9;A0A140TA12	O19617;A0A140T9H5;A0A140T921;A0A140T9U8;A0A140TA05;A0A140T9L3;ENSP00000492782;A0A1W2PRU9		HLA-C		Unspecific	8.76775	6.66442	-6.98712	8.77116	1.32374e-08	+	Allograft rejection;Antigen processing and presentation;Autoimmune thyroid disease;Cell adhesion molecules (CAMs);Cellular senescence;Endocytosis;Epstein-Barr virus infection;Graft-versus-host disease;Herpes simplex virus 1 infection;Human cytomegalovirus infection;Human immunodeficiency virus 1 infection;Human papillomavirus infection;Human T-cell leukemia virus 1 infection;Kaposi sarcoma-associ…	Adaptive Immune System;Antigen Presentation: Folding, assembly and peptide loading of class I MHC;Antigen processing-Cross presentation;Class I MHC mediated antigen processing & presentation;Cytokine Signaling in Immune system;Endosomal/Vacuolar pathway;ER-Phagosome pathway;Immune System;Immunoregulatory interactions between a Lymphoid and a non-Lymphoid cell;Innate Immune System;Interferon alpha…	24;24;22;22;17;17;14;14;8	5;5;3;3;2;2;2;2;1	1;1;1;1;1;1;0;0;1
1056	A0A140T9J9;A0A1W2PR11;A0A140T962;A0A140T9B3;A0A140T942;ENSP00000400410_p.D113A;ENSP00000400410;A0A140T9E1;A0A140T9Z7;F8W9Z8;ENSP00000365412_p.D114A;ENSP00000365412	A0A140T9J9;A0A1W2PR11;A0A140T962;A0A140T9B3;A0A140T942;ENSP00000400410_p.D113A;ENSP00000400410;A0A140T9E1			;;;;;ENSP00000400410_p.D113A;ENSP00000400410_p.D113A;;;;ENSP00000365412_p.D114A;ENSP00000365412_p.D114A	Unspecific	9.40291	8.47352	-3.08737	9.45121	6.45725e-07	+	Allograft rejection;Antigen processing and presentation;Autoimmune thyroid disease;Cell adhesion molecules (CAMs);Cellular senescence;Endocytosis;Epstein-Barr virus infection;Graft-versus-host disease;Herpes simplex virus 1 infection;Human cytomegalovirus infection;Human immunodeficiency virus 1 infection;Human papillomavirus infection;Human T-cell leukemia virus 1 infection;Kaposi sarcoma-associ…	Adaptive Immune System;Antigen Presentation: Folding, assembly and peptide loading of class I MHC;Antigen processing-Cross presentation;Class I MHC mediated antigen processing & presentation;Cytokine Signaling in Immune system;Endosomal/Vacuolar pathway;ER-Phagosome pathway;Immune System;Immunoregulatory interactions between a Lymphoid and a non-Lymphoid cell;Innate Immune System;Interferon alpha…	26;24;24;24;18;16;16;16;10;8;8;8	17;15;15;15;13;11;11;11;10;8;8;8	2;2;2;2;2;0;0;0;2;0;0;0
1203	A0A1L1SSC0;A0A0G2JEP4;A0A0R4J169;E9QN52;A0A0G2JFV5;A0A1L1SVG1;Q91WK0-2;Q91WK0;A0A0G2JDR6;A0A0G2JGZ1;A0A0G2JEF6;ENSP00000416907;ENSP00000416013;ENSP00000391360;C9JJC9;C9JC17;C9J321;ENSP00000412206;C9J0U5	A0A1L1SSC0;A0A0G2JEP4;A0A0R4J169;E9QN52;A0A0G2JFV5;A0A1L1SVG1;Q91WK0-2;Q91WK0	Leucine-rich repeat flightless-interacting protein 2	Lrrfip2		Unspecific	8.01921	6.14908	-6.21244	8.02503	0.000504671	+			29;25;24;24;24;22;22;22;10;10;6;2;2;2;2;2;2;2;2	11;8;8;8;8;8;8;8;0;0;0;0;0;0;0;0;0;0;0	7;4;4;4;4;4;4;4;0;0;0;0;0;0;0;0;0;0;0
1212	A0A1L1STC6;Q6ZWR6-4;Q6ZWR6;A0A1L1SRV6;Q6ZWR6-2;Q6ZWR6-3;Q6ZWR6-5;Q6ZWR5;F5GYQ7;ENSP00000441264;F5H4Q0;ENSP00000446021_p.D672E;ENSP00000446021;ENSP00000481873_p.E448K;ENSP00000481873;A0A087WYJ5;A0A5F9ZHD7	A0A1L1STC6;Q6ZWR6-4;Q6ZWR6	Nesprin-1	Syne1	;;;;;;;;;;;ENSP00000446021_p.D672E;ENSP00000446021_p.D672E;ENSP00000481873_p.E448K;ENSP00000481873_p.E448K;;	Unspecific	9.3733	8.55445	-2.72015	9.43466	9.07999e-06	+		Cell Cycle;Meiosis;Meiotic synapsis;Reproduction	274;271;270;48;41;38;29;6;3;3;3;3;3;2;2;2;2	271;268;267;48;38;35;29;6;3;3;3;3;3;2;2;2;2	200;197;196;40;27;24;22;3;0;0;0;0;0;0;0;0;0
1214	A0A1L1STE6;Q9D6R2;Q9D6R2-2;ENSP00000453459;H0YM46;A0A1L1SQF9	A0A1L1STE6;Q9D6R2;Q9D6R2-2	Isocitrate dehydrogenase [NAD] subunit alpha, mitochondrial	Idh3a		Unspecific	8.94178	7.82464	-3.71106	8.97374	7.15042e-05	+	2-Oxocarboxylic acid metabolism;Biosynthesis of amino acids;Carbon metabolism;Citrate cycle (TCA cycle);Metabolic pathways	Citric acid cycle (TCA cycle);Metabolism;Pyruvate metabolism and Citric Acid (TCA) cycle;The citric acid (TCA) cycle and respiratory electron transport	28;28;23;5;5;1	6;6;4;0;0;1	6;6;4;0;0;1
1245	A0A1W2P7G5;A0A1W2P7J1;E9Q3H6;ENSP00000407843;ENSP00000446723;ENSP00000312587_p.M1I;ENSP00000312587;Q96MF6-3;Q96MF6-2;Q96MF6;ENSP00000446957;H0YHF1;ENSP00000447964;H0YHW3	A0A1W2P7G5;A0A1W2P7J1;E9Q3H6;ENSP00000407843;ENSP00000446723;ENSP00000312587_p.M1I;ENSP00000312587;Q96MF6-3;Q96MF6-2;Q96MF6	Coenzyme Q-binding protein COQ10 homolog A, mitochondrial	Coq10a;COQ10A	;;;;;ENSP00000312587_p.M1I;ENSP00000312587_p.M1I;;;;;;;	Unspecific	8.37457	6.93507	-4.78192	8.39008	0.000391327	+		Metabolism;Respiratory electron transport;Respiratory electron transport, ATP synthesis by chemiosmotic coupling, and heat production by uncoupling proteins.;The citric acid (TCA) cycle and respiratory electron transport	11;11;11;9;9;9;9;9;9;9;5;5;4;4	11;11;11;9;9;9;9;9;9;9;5;5;4;4	10;10;10;8;8;8;8;8;8;8;4;4;4;4
1366	ENSP00000492994;A0A286YF22;ENSP00000493382;ENSP00000493175;O43175;ENSP00000358417;A0A2C9F2M7;ENSP00000493446_p.A399T;ENSP00000493446;A0A286YFL2;ENSP00000493264;A0A286YFA2;ENSP00000493432;A0A286YFM8;ENSP00000493213;A0A286YFC8;ENSP00000493398;ENSP00000493288;ENSP00000493187;ENSP00000493089;ENSP00000493079;A0A286YFB2;ENSP00000493296;A0A286YF78;ENSP00000493415;ENSP00000492955;A0A286YER3;F6ZSB7;ENSP00…	ENSP00000492994;A0A286YF22;ENSP00000493382;ENSP00000493175;O43175;ENSP00000358417;A0A2C9F2M7;ENSP00000493446_p.A399T;ENSP00000493446;A0A286YFL2;ENSP00000493264;A0A286YFA2;ENSP00000493432;A0A286YFM8	D-3-phosphoglycerate dehydrogenase	PHGDH	;;;;;;;ENSP00000493446_p.A399T;ENSP00000493446_p.A399T;;;;;;;;;;;;;;;;;;;;;;;;;;;	Unspecific	9.56435	10.344	2.58982	10.4107	0.000226738	+	Biosynthesis of amino acids;Carbon metabolism;Cysteine and methionine metabolism;Glycine, serine and threonine metabolism;Metabolic pathways	Metabolism;Metabolism of amino acids and derivatives;Serine biosynthesis	36;36;36;36;36;34;34;29;29;29;29;29;21;21;13;13;13;13;13;13;13;13;13;13;12;12;12;12;10;10;8;8;6;6;6;6	36;36;36;36;36;34;34;29;29;29;29;29;21;21;13;13;13;13;13;13;13;13;13;13;12;12;12;12;10;10;8;8;6;6;6;6	10;10;10;10;10;8;8;4;4;4;5;5;1;1;0;0;0;0;0;0;0;0;1;1;0;0;0;0;0;0;1;1;0;0;0;0
1404	A0A2K6EDK8;Q8C255;Q8C255-2;Q8C255-3;ENSP00000459375;Q9H4A9-3	A0A2K6EDK8;Q8C255;Q8C255-2;Q8C255-3	Dipeptidase 2	Dpep2		Unspecific	7.70165	5.84988	-6.15146	7.70772	0.00123845	+		Aflatoxin activation and detoxification;Arachidonic acid metabolism;Biological oxidations;Fatty acid metabolism;Metabolism;Metabolism of lipids;Synthesis of Leukotrienes (LT) and Eoxins (EX)	13;13;13;11;2;2	13;13;13;11;2;2	9;9;9;7;0;0
1464	ENSP00000494995;A0A2R8Y623	ENSP00000494995;A0A2R8Y623				Unspecific	8.94631	7.6475	-4.31456	8.96761	4.88065e-06	+	Ribosome	Activation of the mRNA upon binding of the cap-binding complex and eIFs, and subsequent binding to 43S;Axon guidance;Cap-dependent Translation Initiation;Developmental Biology;Disease;Eukaryotic Translation Elongation;Eukaryotic Translation Initiation;Eukaryotic Translation Termination;Formation of a pool of free 40S subunits;Formation of the ternary complex, and subsequently, the 43S complex;GTP…	20;20	2;2	2;2
1537	A0A338P6K2	A0A338P6K2				Unspecific	9.63772	8.9363	-2.33007	9.7165	0.00102712	+			161	124	1
1693	A0A494BBF0;G5E8D6;Q9WVJ9;E9Q3N9;A0A494BAR1;E9Q3F3;F6Z1C2;E9Q2T8;ENSP00000435419;E9PKA3;E9Q2A0;ENSP00000435963;E9PRQ8;ENSP00000431305;F7AYH6;E9Q1U0;H0YCB5	A0A494BBF0;G5E8D6;Q9WVJ9;E9Q3N9;A0A494BAR1;E9Q3F3	EGF-containing fibulin-like extracellular matrix protein 2	Efemp2		Unspecific	9.39771	8.50483	-2.96607	9.45	1.59487e-06	+		Elastic fibre formation;Extracellular matrix organization;Molecules associated with elastic fibres	22;22;22;20;18;14;9;8;6;6;5;5;5;3;3;3;1	22;22;22;20;18;14;9;8;6;6;5;5;5;3;3;3;1	6;6;6;6;6;6;4;2;0;0;0;0;0;0;0;0;0
1713	LRG_76p1;ENSP00000498780;ENSP00000380955;ENSP00000380950;ENSP00000380948;ENSP00000347279;A0A494C0X7;ENSP00000303242;P05107;ENSP00000380952;D3DSM0;J3KNI6;ENSP00000317697;ENSP00000428503;E7EVZ9;ENSP00000428979;E5RK25;ENSP00000428413;E5RIG7;ENSP00000430901;E5RHE6;ENSP00000429683;E5RHT0;ENSP00000428125;E5RK54;ENSP00000428870;E5RFI0;ENSP00000428434;E5RIE4;ENSP00000380944;A8MVG7	LRG_76p1;ENSP00000498780;ENSP00000380955;ENSP00000380950;ENSP00000380948;ENSP00000347279;A0A494C0X7;ENSP00000303242;P05107;ENSP00000380952;D3DSM0;J3KNI6;ENSP00000317697	Integrin beta-2;Integrin beta	ITGB2		Unspecific	9.33707	8.57949	-2.51664	9.40701	0.00096517	+	African trypanosomiasis;Allograft rejection;alpha-Linolenic acid metabolism;Aminoacyl-tRNA biosynthesis;Amoebiasis;Antigen processing and presentation;Arachidonic acid metabolism;Arginine and proline metabolism;Asthma;Autoimmune thyroid disease;B cell receptor signaling pathway;beta-Alanine metabolism;Calcium signaling pathway;Cell adhesion molecules (CAMs);Chemical carcinogenesis;Cholesterol met…	Adaptive Immune System;Cell surface interactions at the vascular wall;Cytokine Signaling in Immune system;Extracellular matrix organization;Hemostasis;Immune System;Immunoregulatory interactions between a Lymphoid and a non-Lymphoid cell;Innate Immune System;Integrin cell surface interactions;Interleukin-4 and Interleukin-13 signaling;Neutrophil degranulation;Signaling by Interleukins;Toll Like R…	28;28;28;28;28;28;28;28;27;26;26;14;14;5;5;4;4;3;3;1;1;1;1;1;1;1;1;1;1;1;1	20;20;20;20;20;20;20;20;19;18;18;9;9;5;5;4;4;3;3;1;1;1;1;1;1;1;1;1;1;1;1	20;20;20;20;20;20;20;20;19;18;18;9;9;5;5;4;4;3;3;1;1;1;1;1;1;1;1;1;1;1;1
1745	ENSP00000260595;A0A4W8VYG7;ENSP00000386113;ENSP00000385452;ENSP00000324025;ENSP00000385574;A0A4W8W4R1;Q99674;ENSP00000385103;Q99674-2;ENSP00000491464_p.G61S;ENSP00000491464;Q99674-3	ENSP00000260595;A0A4W8VYG7;ENSP00000386113;ENSP00000385452;ENSP00000324025;ENSP00000385574;A0A4W8W4R1;Q99674	Cell growth regulator with EF hand domain protein 1	CGREF1	;;;;;;;;;;ENSP00000491464_p.G61S;ENSP00000491464_p.G61S;	Unspecific	6.40043	8.19422	5.95883	8.20115	5.73632e-05	+			8;8;8;8;8;8;8;8;2;2;1;1;1	8;8;8;8;8;8;8;8;2;2;1;1;1	8;8;8;8;8;8;8;8;2;2;1;1;1
1781	ENSP00000499289;A0A590UJ49;ENSP00000473260;ENSP00000357699;ENSP00000357698;ENSP00000357697;P29034;R4GN49;ENSP00000473489;Q5RHS7;ENSP00000357696	ENSP00000499289;A0A590UJ49;ENSP00000473260;ENSP00000357699;ENSP00000357698;ENSP00000357697;P29034;R4GN49;ENSP00000473489	Protein S100-A2	S100A2		Unspecific	9.41914	7.14971	-7.53887	9.42147	1.16024e-30	+			10;10;9;9;9;9;9;6;6;3;3	10;10;9;9;9;9;9;6;6;3;3	10;10;9;9;9;9;9;6;6;3;3
1817	A0A5F8MPH8;A0A571BG59;O35452;ENSP00000418248;C9J7W4	A0A5F8MPH8;A0A571BG59;O35452		Tnxb		Unspecific	9.95374	8.98397	-3.22151	9.99797	2.31544e-06	+	ECM-receptor interaction;Focal adhesion;Human papillomavirus infection;MicroRNAs in cancer;PI3K-Akt signaling pathway	ECM proteoglycans;Extracellular matrix organization	147;135;133;10;10	147;135;133;10;10	22;10;8;0;0
1821	A0A5F8MPM4;A0A5F9ZI26;P25189-2;LRG_256p1;ENSP00000432943;ENSP00000431538;E9QK82;P25189	A0A5F8MPM4;A0A5F9ZI26;P25189-2;LRG_256p1;ENSP00000432943;ENSP00000431538;E9QK82;P25189	Myelin protein P0	MPZ;Mpz		Unspecific	9.60035	8.30177	-4.3138	9.62166	9.11038e-09	+	Cell adhesion molecules (CAMs)		15;13;13;12;12;12;12;12	15;13;13;12;12;12;12;12	4;2;2;1;1;1;1;1
1877	ENSP00000371212_p.M565V;ENSP00000371212;ENSP00000295971_p.M565V;ENSP00000295971;A0AV96;ENSP00000423243_p.M527V;ENSP00000423243;B7Z8Z7;ENSP00000371214_p.M496V;ENSP00000371214;A0AV96-2;ENSP00000422945;D6R9D6;ENSP00000422564;D6RBS9;ENSP00000421589;D6REZ6;ENSP00000423527;D6R9M7;ENSP00000423398;D6RA49;ENSP00000426542;D6RFL5;ENSP00000424019;D6RBP6;ENSP00000425507;ENSP00000425111;D6RCT1	ENSP00000371212_p.M565V;ENSP00000371212;ENSP00000295971_p.M565V;ENSP00000295971;A0AV96;ENSP00000423243_p.M527V;ENSP00000423243;B7Z8Z7;ENSP00000371214_p.M496V;ENSP00000371214;A0AV96-2;ENSP00000422945;D6R9D6;ENSP00000422564;D6RBS9;ENSP00000421589;D6REZ6	RNA-binding protein 47	RBM47	ENSP00000371212_p.M565V;ENSP00000371212_p.M565V;ENSP00000295971_p.M565V;ENSP00000295971_p.M565V;;ENSP00000423243_p.M527V;ENSP00000423243_p.M527V;;ENSP00000371214_p.M496V;ENSP00000371214_p.M496V;;;;;;;;;;;;;;;;;;	Unspecific	8.13453	5.94544	-7.27197	8.13733	4.82318e-05	+			18;18;18;18;18;17;17;17;16;16;16;14;14;10;10;9;9;8;8;6;6;6;6;5;5;2;2;2	18;18;18;18;18;17;17;17;16;16;16;14;14;10;10;9;9;8;8;6;6;6;6;5;5;2;2;2	5;5;5;5;5;4;4;4;3;3;3;3;3;2;2;2;2;2;2;2;2;2;2;2;2;2;2;2
1886	ENSP00000347532;A0MZ66;A0MZ66-6;A0MZ66-3;ENSP00000260777;A0MZ66-5;ENSP00000376636;A0MZ66-4;ENSP00000376635;A0MZ66-8;ENSP00000480109;A0MZ66-2;A0MZ66-7	ENSP00000347532;A0MZ66;A0MZ66-6;A0MZ66-3;ENSP00000260777;A0MZ66-5;ENSP00000376636;A0MZ66-4;ENSP00000376635;A0MZ66-8;ENSP00000480109;A0MZ66-2	Shootin-1	KIAA1598		Unspecific	7.70824	9.43839	5.74744	9.4464	3.1477e-08	+		Axon guidance;Developmental Biology;L1CAM interactions;Recycling pathway of L1	54;54;51;51;50;50;47;47;43;43;36;36;20	54;54;51;51;50;50;47;47;43;43;36;36;20	33;33;33;30;33;33;26;26;26;26;17;17;17
1994	A2AAJ9;Z4YJE4;A2AAJ9-2;F7DCJ0;ENSP00000355667_p.V568M;ENSP00000355667_p.N93D;ENSP00000355667;A0A0A0MRI8;ENSP00000499480_p.Q184E;ENSP00000499480;A0A590UJJ2;ENSP00000499365;A0A590UJD0;ENSP00000499480_p.G257W;ENSP00000499592;A0A590UJV7;ENSP00000499365_p.A172T	A2AAJ9;Z4YJE4	Obscurin	Obscn	;;;;ENSP00000355667_p.V568M;ENSP00000355667_p.N93D;ENSP00000355667_p.V568M;ENSP00000355667_p.N93D;;ENSP00000499480_p.Q184E;ENSP00000499480_p.G257W;ENSP00000499480_p.Q184E;;ENSP00000499365_p.A172T;;ENSP00000499480_p.G257W;;;ENSP00000499365_p.A172T	Alt	9.94815	6.28445	-12.1705	9.94824	1.06943e-63	+		Cell death signalling via NRAGE, NRIF and NADE;Death Receptor Signalling;G alpha (12/13) signalling events;GPCR downstream signalling;NRAGE signals death through JNK;p75 NTR receptor-mediated signalling;Rho GTPase cycle;Signal Transduction;Signaling by GPCR;Signaling by Rho GTPases	280;245;15;6;5;5;5;5;4;3;3;2;2;2;1;1;1	280;245;15;6;5;5;5;5;4;3;3;2;2;2;1;1;1	3;0;0;0;0;0;0;0;0;0;0;0;0;0;0;0;0
2114	A2AN08-3;A2AN08;A2AN08-5;A2AN08-2;Z4YMA7;F6SSP6;A2AN08-4;ENSP00000364366;Q5T4S7-6;Z4YLP1	A2AN08-3;A2AN08;A2AN08-5;A2AN08-2	E3 ubiquitin-protein ligase UBR4	Ubr4	;;;;;;;ENSP00000364366_p.P112L;;	Alt+Ref	8.82336	7.62767	-3.972	8.85019	4.67601e-05	+	Human papillomavirus infection;Viral carcinogenesis	Adaptive Immune System;Antigen processing: Ubiquitination & Proteasome degradation;Class I MHC mediated antigen processing & presentation;Immune System;Innate Immune System;Neutrophil degranulation	230;230;230;117;78;77;20;18;18;6	39;39;39;13;10;14;2;0;0;1	39;39;39;13;10;14;2;0;0;1
2172	A2AUC9;ENSP00000284669;O60662;O60662-2	A2AUC9;ENSP00000284669;O60662;O60662-2	Kelch-like protein 41	Klhl41;KLHL41		Unspecific	9.67885	6.36137	-11.0204	9.67906	5.3947e-45	+		Adaptive Immune System;Antigen processing: Ubiquitination & Proteasome degradation;Class I MHC mediated antigen processing & presentation;Immune System;Metabolism of proteins;Neddylation;Post-translational protein modification	34;20;20;19	34;20;20;19	25;11;11;11
2248	A4QPD3;P15307;ENSP00000433616;E9PJZ9;A0A494B901	A4QPD3;P15307	Proto-oncogene c-Rel	Rel		Unspecific	8.19427	6.5902	-5.32864	8.20495	0.000875385	+	Acute myeloid leukemia;Adipocytokine signaling pathway;AGE-RAGE signaling pathway in diabetic complications;Amoebiasis;Antifolate resistance;Apoptosis;B cell receptor signaling pathway;cAMP signaling pathway;Cellular senescence;Chagas disease (American trypanosomiasis);Chemokine signaling pathway;Chronic myeloid leukemia;Cocaine addiction;C-type lectin receptor signaling pathway;Cytosolic DNA-sen…	Activation of NF-kappaB in B cells;Adaptive Immune System;CD209 (DC-SIGN) signaling;Cellular responses to external stimuli;Cellular responses to stress;Cellular Senescence;Chromatin modifying enzymes;Chromatin organization;CLEC7A (Dectin-1) signaling;CLEC7A/inflammasome pathway;C-type lectin receptors (CLRs);Cytokine Signaling in Immune system;Cytosolic sensors of pathogen-associated DNA;DDX58/IF…	17;17;1;1;1	10;10;0;0;0	10;10;0;0;0
2282	ENSP00000495809;ENSP00000412724;ENSP00000349902;ENSP00000404265;A6NFQ2-2;A6NFQ2;ENSP00000441099;ENSP00000389100;ENSP00000495809_p.P705T;ENSP00000412724_p.P705T;ENSP00000349902_p.P705T;ENSP00000404265_p.P705T;A6NFQ2-3;ENSP00000490573;A0A1B0GVM2;ENSP00000441099_p.P601T;ENSP00000389100_p.P601T;Q8N1I1;ENSP00000431079;ENSP00000431079_p.P424T	ENSP00000495809;ENSP00000412724;ENSP00000349902;ENSP00000404265;A6NFQ2-2;A6NFQ2;ENSP00000441099;ENSP00000389100;ENSP00000495809_p.P705T;ENSP00000412724_p.P705T;ENSP00000349902_p.P705T;ENSP00000404265_p.P705T;A6NFQ2-3;ENSP00000490573;A0A1B0GVM2;ENSP00000441099_p.P601T;ENSP00000389100_p.P601T;Q8N1I1;ENSP00000431079;ENSP00000431079_p.P424T	Protein FAM115C	FAM115C	ENSP00000495809_p.P705T;ENSP00000412724_p.P705T;ENSP00000349902_p.P705T;ENSP00000404265_p.P705T;;;ENSP00000441099_p.P601T;ENSP00000389100_p.P601T;ENSP00000495809_p.P705T;ENSP00000412724_p.P705T;ENSP00000349902_p.P705T;ENSP00000404265_p.P705T;;;;ENSP00000441099_p.P601T;ENSP00000389100_p.P601T;;ENSP00000431079_p.P424T;ENSP00000431079_p.P424T	Ref	8.23137	6.27423	-6.50148	8.23613	5.48819e-05	+			19;19;19;19;19;19;18;18;18;18;18;18;18;17;17;17;17;16;16;15	19;19;19;19;19;19;18;18;18;18;18;18;18;17;17;17;17;16;16;15	19;19;19;19;19;19;18;18;18;18;18;18;18;17;17;17;17;16;16;15
2286	ENSP00000386878_p.P25Q;ENSP00000386878;ENSP00000242140_p.P25Q;ENSP00000242140;A6NGB9;ENSP00000386878_p.Q287L;ENSP00000242140_p.Q287L;ENSP00000386790_p.P25Q;ENSP00000386790;A0A0A0MSG0;ENSP00000386790_p.Q287L;D3Z5R4;E9Q2D0;P0C7L0-2;P0C7L0	ENSP00000386878_p.P25Q;ENSP00000386878;ENSP00000242140_p.P25Q;ENSP00000242140;A6NGB9;ENSP00000386878_p.Q287L;ENSP00000242140_p.Q287L;ENSP00000386790_p.P25Q;ENSP00000386790;A0A0A0MSG0;ENSP00000386790_p.Q287L	WAS/WASL-interacting protein family member 3	WIPF3	ENSP00000386878_p.P25Q;ENSP00000386878_p.Q287L;ENSP00000386878_p.P25Q;ENSP00000242140_p.P25Q;ENSP00000242140_p.Q287L;ENSP00000242140_p.P25Q;;ENSP00000386878_p.Q287L;ENSP00000242140_p.Q287L;ENSP00000386790_p.P25Q;ENSP00000386790_p.Q287L;ENSP00000386790_p.P25Q;;ENSP00000386790_p.Q287L;;;;	Ref	6.99553	8.52522	5.08153	8.53786	5.24564e-05	+	Endocytosis;Pathogenic Escherichia coli infection;Yersinia infection	Fcgamma receptor (FCGR) dependent phagocytosis;Immune System;Innate Immune System;Regulation of actin dynamics for phagocytic cup formation;RHO GTPase Effectors;RHO GTPases Activate WASPs and WAVEs;Signal Transduction;Signaling by Rho GTPases	23;23;23;23;23;22;22;22;22;22;21;5;5;5;5	23;23;23;23;23;22;22;22;22;22;21;5;5;5;5	23;23;23;23;23;22;22;22;22;22;21;5;5;5;5
2398	ENSP00000258787_p.V49M;ENSP00000258787_p.Q861R;ENSP00000258787;B0I1T2;ENSP00000258787_p.D614E;ENSP00000498184_p.V49M;ENSP00000498184_p.Q861R;ENSP00000498184;A0A3B3IU30;ENSP00000498184_p.D614E;B0I1T2-4;B0I1T2-3;F8WEW9;ENSP00000419847_p.V49M;ENSP00000419847;B0I1T2-2	ENSP00000258787_p.V49M;ENSP00000258787_p.Q861R;ENSP00000258787;B0I1T2;ENSP00000258787_p.D614E;ENSP00000498184_p.V49M;ENSP00000498184_p.Q861R;ENSP00000498184;A0A3B3IU30;ENSP00000498184_p.D614E;B0I1T2-4	Unconventional myosin-Ig;Minor histocompatibility antigen HA-2	MYO1G	ENSP00000258787_p.V49M;ENSP00000258787_p.Q861R;ENSP00000258787_p.D614E;ENSP00000258787_p.M489T;ENSP00000258787_p.Q861R;ENSP00000258787_p.V49M;;ENSP00000258787_p.D614E;ENSP00000498184_p.V49M;ENSP00000498184_p.Q861R;ENSP00000498184_p.D614E;ENSP00000498184_p.M489T;ENSP00000498184_p.Q861R;ENSP00000498184_p.V49M;;ENSP00000498184_p.D614E;;;;ENSP00000419847_p.V49M;ENSP00000419847_p.V49M;	Alt+Ref	9.45107	7.56602	-6.26198	9.45669	5.58963e-22	+	Pathogenic Escherichia coli infection		49;49;49;49;48;43;43;43;43;42;29;18;7;7;7;7	47;47;47;47;46;41;41;41;41;40;27;16;5;5;5;5	1;1;1;1;1;1;1;1;1;1;1;1;0;0;0;0
2429	ENSP00000359756;B1ALU1;ENSP00000353006;ENSP00000322270;ENSP00000359765;ENSP00000485786;ENSP00000359762;B1ALU3;ENSP00000359763;ENSP00000359752;ENSP00000359758;ENSP00000359760;O95490-2;O95490-5;O95490;O95490-7;O95490-6;ENSP00000397740;H0Y5C0;ENSP00000359748;ENSP00000359750;O95490-3;O95490-4;Q0P6A0;ENSP00000385853;H0Y3V3;A0A0G2JGC2	ENSP00000359756;B1ALU1;ENSP00000353006;ENSP00000322270;ENSP00000359765;ENSP00000485786;ENSP00000359762;B1ALU3;ENSP00000359763;ENSP00000359752;ENSP00000359758;ENSP00000359760;O95490-2;O95490-5;O95490;O95490-7;O95490-6;ENSP00000397740;H0Y5C0;ENSP00000359748;ENSP00000359750;O95490-3;O95490-4	Latrophilin-2	LPHN2		Unspecific	8.64142	7.39126	-4.15296	8.66517	0.000555142	+			8;8;8;8;8;8;8;8;8;8;8;8;8;8;8;8;8;7;7;6;6;6;6;2;2;2;2	8;8;8;8;8;8;8;8;8;8;8;8;8;8;8;8;8;7;7;6;6;6;6;2;2;2;2	2;2;2;2;2;2;2;2;2;2;2;2;2;2;2;2;2;2;2;2;2;2;2;0;0;0;0
2478	B1AUL6;P97504;Q5STT8;LRG_189p1;ENSP00000398655;Q08881;Q03526	B1AUL6;P97504	Cytoplasmic tyrosine-protein kinase BMX	Bmx		Unspecific	8.13436	6.03104	-6.98706	8.13777	9.36343e-05	+	Chemokine signaling pathway;Leukocyte transendothelial migration;T cell receptor signaling pathway	Adaptive Immune System;Fc epsilon receptor (FCERI) signaling;FCERI mediated Ca+2 mobilization;Generation of second messenger molecules;Immune System;Innate Immune System;TCR signaling	18;18;2;2;2;2;2	18;18;2;2;2;2;2	6;6;0;0;0;0;0
2507	E9PV45;B1AY13;B1AY13-2;ENSP00000489026;A0A0U1RQI9	E9PV45;B1AY13	Ubiquitin carboxyl-terminal hydrolase;Ubiquitin carboxyl-terminal hydrolase 24	Usp24		Unspecific	8.73122	7.02819	-5.65735	8.73975	3.54337e-06	+		Deubiquitination;Metabolism of proteins;Post-translational protein modification;Ub-specific processing proteases	103;103;14;5;5	15;15;4;0;0	15;15;4;0;0
2790	ENSP00000496919;C9J5X1;ENSP00000497069;P08069;H0YNR0;ENSP00000454115;H0YMJ5;ENSP00000453630	ENSP00000496919;C9J5X1;ENSP00000497069;P08069	Tyrosine-protein kinase receptor;Insulin-like growth factor 1 receptor;Insulin-like growth factor 1 receptor alpha chain;Insulin-like growth factor 1 receptor beta chain	IGF1R		Unspecific	7.06465	8.74635	5.58652	8.7553	2.62354e-05	+	Adherens junction;AMPK signaling pathway;Autophagy - animal;Breast cancer;EGFR tyrosine kinase inhibitor resistance;Endocrine resistance;Endocytosis;Focal adhesion;FoxO signaling pathway;Glioma;Hepatocellular carcinoma;HIF-1 signaling pathway;Longevity regulating pathway;Longevity regulating pathway - multiple species;Long-term depression;MAPK signaling pathway;Melanoma;mTOR signaling pathway;Ooc…	ESR-mediated signaling;Extra-nuclear estrogen signaling;IGF1R signaling cascade;IRS-related events triggered by IGF1R;SHC-related events triggered by IGF1R;Signal Transduction;Signaling by Nuclear Receptors;Signaling by Receptor Tyrosine Kinases;Signaling by Type 1 Insulin-like Growth Factor 1 Receptor (IGF1R)	46;46;46;46;8;8;5;5	46;46;46;46;8;8;5;5	9;9;9;9;2;2;3;3
2798	ENSP00000397542_p.V379I;ENSP00000397542_p.R446W;ENSP00000397542;C9J8B8;ENSP00000343540_p.V409I;ENSP00000343540_p.R476W;ENSP00000343540;ENSP00000216271_p.V429I;ENSP00000216271_p.R496W;ENSP00000216271;Q969S8-2;Q969S8;Q969S8-4;ENSP00000406150_p.V379I;ENSP00000406150;Q969S8-5;Q08AP5;ENSP00000486864;ENSP00000407640;ENSP00000397517	ENSP00000397542_p.V379I;ENSP00000397542_p.R446W;ENSP00000397542;C9J8B8;ENSP00000343540_p.V409I;ENSP00000343540_p.R476W;ENSP00000343540;ENSP00000216271_p.V429I;ENSP00000216271_p.R496W;ENSP00000216271;Q969S8-2;Q969S8;Q969S8-4;ENSP00000406150_p.V379I;ENSP00000406150;Q969S8-5	Histone deacetylase 10	HDAC10	ENSP00000397542_p.V379I;ENSP00000397542_p.R446W;ENSP00000397542_p.R446W;ENSP00000397542_p.V379I;;ENSP00000343540_p.V409I;ENSP00000343540_p.R476W;ENSP00000343540_p.R476W;ENSP00000343540_p.V409I;ENSP00000216271_p.V429I;ENSP00000216271_p.R496W;ENSP00000216271_p.R496W;ENSP00000216271_p.V429I;;;;ENSP00000406150_p.V379I;ENSP00000406150_p.V379I;;;;;	Unspecific	7.50611	8.80396	4.31137	8.8253	5.36346e-05	+	Alcoholism;Viral carcinogenesis	Chromatin modifying enzymes;Chromatin organization;Constitutive Signaling by NOTCH1 HD+PEST Domain Mutants;Constitutive Signaling by NOTCH1 PEST Domain Mutants;Disease;Diseases of signal transduction;Gene expression (Transcription);Generic Transcription Pathway;HDACs deacetylate histones;NOTCH1 Intracellular Domain Regulates Transcription;Notch-HLH transcription pathway;RNA Polymerase II Transcri…	18;18;18;18;18;18;18;18;18;18;18;18;14;11;11;11;4;4;4;4	18;18;18;18;18;18;18;18;18;18;18;18;14;11;11;11;4;4;4;4	17;17;17;17;17;17;17;17;17;17;17;17;13;10;10;10;3;3;3;3
2822	ENSP00000345179;ENSP00000415235;C9JF17;P05090;ENSP00000393076;C9JX71;F8WBT9;ENSP00000391597	ENSP00000345179;ENSP00000415235;C9JF17;P05090;ENSP00000393076;C9JX71	Apolipoprotein D	APOD	ENSP00000345179_p.V76M;ENSP00000415235_p.V104M;;;ENSP00000393076_p.V76M;;;	Alt+Ref	9.08483	10.5211	4.77128	10.5367	1.42228e-12	+		NR1H2 and NR1H3-mediated signaling;NR1H3 & NR1H2 regulate gene expression linked to cholesterol transport and efflux;Signal Transduction;Signaling by Nuclear Receptors;SLC-mediated transmembrane transport;Transport of fatty acids;Transport of small molecules;Transport of vitamins, nucleosides, and related molecules	16;16;16;16;10;10;1;1	16;16;16;16;10;10;1;1	2;2;2;2;2;2;0;0
3030	D0EV57;A0A140T9V0;A0A140T8X0;ENSP00000366057_p.G125W;ENSP00000366057_p.E233D;ENSP00000366057;ENSP00000334263_p.G125W;ENSP00000334263_p.E233D;ENSP00000334263;A0A0G2JPA3;A0A140T9B7;A0A0G2JH66;P30511;ENSP00000259951_p.G125W;ENSP00000259951_p.E233D;ENSP00000259951;P30511-3;A0A140T9W7;A0A140T9W3;A0A140T9D9;A0A140T9C2;A0A140T939;ENSP00000397376_p.G125W;ENSP00000397376;P30511-2;A0A140T9X6;A0A140T9J8;A0A…	D0EV57;A0A140T9V0;A0A140T8X0;ENSP00000366057_p.G125W;ENSP00000366057_p.E233D;ENSP00000366057;ENSP00000334263_p.G125W;ENSP00000334263_p.E233D;ENSP00000334263;A0A0G2JPA3;A0A140T9B7;A0A0G2JH66;P30511;ENSP00000259951_p.G125W;ENSP00000259951_p.E233D;ENSP00000259951;P30511-3;A0A140T9W7;A0A140T9W3;A0A140T9D9;A0A140T9C2;A0A140T939;ENSP00000397376_p.G125W;ENSP00000397376;P30511-2;A0A140T9X6;A0A140T9J8;A0A…	HLA class I histocompatibility antigen, alpha chain F	HLA-F	;;;ENSP00000366057_p.G125W;ENSP00000366057_p.E233D;ENSP00000366057_p.E233D;ENSP00000366057_p.G125W;ENSP00000334263_p.G125W;ENSP00000334263_p.E233D;ENSP00000334263_p.E233D;ENSP00000334263_p.G125W;;;;;ENSP00000259951_p.G125W;ENSP00000259951_p.E233D;ENSP00000259951_p.E233D;ENSP00000259951_p.G125W;;;;;;;ENSP00000397376_p.G125W;ENSP00000397376_p.G125W;;;;;;;;;;;ENSP00000486947_p.E22D;ENSP00000486947_p…	Unspecific	8.39795	7.30428	-3.63311	8.43161	0.00077748	+	Allograft rejection;Antigen processing and presentation;Autoimmune thyroid disease;Cell adhesion molecules (CAMs);Cellular senescence;Endocytosis;Epstein-Barr virus infection;Graft-versus-host disease;Herpes simplex virus 1 infection;Human cytomegalovirus infection;Human immunodeficiency virus 1 infection;Human papillomavirus infection;Human T-cell leukemia virus 1 infection;Kaposi sarcoma-associ…	Adaptive Immune System;Antigen Presentation: Folding, assembly and peptide loading of class I MHC;Antigen processing-Cross presentation;Class I MHC mediated antigen processing & presentation;Cytokine Signaling in Immune system;Endosomal/Vacuolar pathway;ER-Phagosome pathway;Immune System;Immunoregulatory interactions between a Lymphoid and a non-Lymphoid cell;Interferon alpha/beta signaling;Inter…	19;18;18;18;18;18;18;18;18;18;18;18;18;17;17;17;17;14;14;14;14;14;14;14;14;13;13;13;4;4;4;4;4;4;3;3;3	13;12;12;13;13;13;13;13;13;12;12;12;13;12;12;12;12;9;9;9;9;9;10;10;10;8;9;9;3;3;3;3;3;3;2;2;2	13;12;12;13;13;13;13;13;13;12;12;12;13;12;12;12;12;9;9;9;9;9;10;10;10;8;9;9;3;3;3;3;3;3;2;2;2
3403	ENSP00000396241;ENSP00000343683;ENSP00000426034;E7EPV7;ENSP00000426955;ENSP00000422238;ENSP00000378442;ENSP00000378437;ENSP00000338345;P37840-2;P37840;ENSP00000423445;D6RA31;H6UYS7;ENSP00000479604;ENSP00000484044;ENSP00000421485;ENSP00000378440;P37840-3	ENSP00000396241;ENSP00000343683;ENSP00000426034;E7EPV7;ENSP00000426955;ENSP00000422238;ENSP00000378442;ENSP00000378437;ENSP00000338345;P37840-2;P37840;ENSP00000423445;D6RA31;H6UYS7;ENSP00000479604;ENSP00000484044;ENSP00000421485;ENSP00000378440;P37840-3	Alpha-synuclein	SNCA		Unspecific	8.87191	9.93281	3.52421	9.969	0.000144573	+	Alzheimer disease;Parkinson disease	Amyloid fiber formation;Metabolism of proteins	11;11;11;11;11;11;11;11;11;11;11;7;7;7;7;7;7;7;7	11;11;11;11;11;11;11;11;11;11;11;7;7;7;7;7;7;7;7	4;4;4;4;4;4;4;4;4;4;4;2;2;2;2;2;2;2;2
3439	ENSP00000498132;ENSP00000467244;ENSP00000432332;ENSP00000409996_p.L61P;ENSP00000409996;E7EV01;O15484;ENSP00000496931;A0A3B3IRX8;ENSP00000435894;E9PS73	ENSP00000498132;ENSP00000467244;ENSP00000432332;ENSP00000409996_p.L61P;ENSP00000409996;E7EV01;O15484;ENSP00000496931;A0A3B3IRX8	Calpain-5	ASB2;CAPN5	;;;ENSP00000409996_p.L61P;ENSP00000409996_p.L61P;;;;;;	Unspecific	8.92338	7.9309	-3.29696	8.96546	0.000370198	+		Degradation of the extracellular matrix;Extracellular matrix organization	31;31;31;31;31;31;31;24;24;6;6	31;31;31;31;31;31;31;24;24;6;6	13;13;13;13;13;13;13;9;9;3;3
3729	K3W4M2;E9PZQ0;A0A1L1SQG7;Q80ZZ5;ENSP00000353174_p.R2052X;ENSP00000355533_p.R2068X;ENSP00000489672;A0A1B0GTF2	K3W4M2;E9PZQ0;A0A1L1SQG7	Ryanodine receptor 1	Ryr1	;;;;ENSP00000353174_p.R2052X;ENSP00000355533_p.R2068X;;	Ref	10.2912	6.73807	-11.8033	10.2913	4.96448e-65	+	Alzheimer disease;Apelin signaling pathway;Calcium signaling pathway;Circadian entrainment;Oxytocin signaling pathway;Salivary secretion	Cardiac conduction;Ion channel transport;Ion homeostasis;Muscle contraction;Stimuli-sensing channels;Transport of small molecules	257;257;255;4;4;4;1;1	257;257;255;4;4;4;1;1	103;103;103;0;0;0;0;0
3853	E9Q604;G5E8F1;E9Q5K8;Q3U1U4;P05555;A0A0R4J1B4;P05555-2;D6RJ73;I3NI33;ENSP00000461850	E9Q604;G5E8F1;E9Q5K8;Q3U1U4;P05555;A0A0R4J1B4;P05555-2	Integrin alpha-M	Itgam		Unspecific	10.096	8.86422	-4.09176	10.1207	3.57264e-09	+	Acute myeloid leukemia;Amoebiasis;Cell adhesion molecules (CAMs);Complement and coagulation cascades;Hematopoietic cell lineage;Legionellosis;Leishmaniasis;Leukocyte transendothelial migration;Pertussis;Phagosome;Rap1 signaling pathway;Regulation of actin cytoskeleton;Staphylococcus aureus infection;Transcriptional misregulation in cancer;Tuberculosis	Cell surface interactions at the vascular wall;Cytokine Signaling in Immune system;Extracellular matrix organization;Hemostasis;Immune System;Innate Immune System;Integrin cell surface interactions;Interleukin-4 and Interleukin-13 signaling;Neutrophil degranulation;Signaling by Interleukins;Toll Like Receptor 4 (TLR4) Cascade;Toll-like Receptor Cascades	59;59;58;58;56;55;52;1;1;1	59;59;58;58;56;55;52;1;1;1	53;53;52;52;50;51;48;1;0;0
4127	ENSP00000447654;ENSP00000376862;ENSP00000052754;P07585;ENSP00000413723;P07585-2;F8VXZ8;ENSP00000449014;F8VUF6;ENSP00000447886;F8VWU0;ENSP00000449782;ENSP00000447674;ENSP00000401021;P07585-3;ENSP00000399815;P07585-4;F8VX58;ENSP00000449438;F8VNV6;ENSP00000446530;ENSP00000449408;H0YIH3;ENSP00000448853;H0YI87;ENSP00000398514;F8VNW0;ENSP00000446527;F8VU58;ENSP00000448857;ENSP00000448057;P07585-5	ENSP00000447654;ENSP00000376862;ENSP00000052754;P07585;ENSP00000413723;P07585-2	Decorin	DCN		Unspecific	8.87486	7.97179	-2.99994	8.92601	0.00109141	+	Proteoglycans in cancer;TGF-beta signaling pathway	A tetrasaccharide linker sequence is required for GAG synthesis;Chondroitin sulfate biosynthesis;Chondroitin sulfate/dermatan sulfate metabolism;CS/DS degradation;Defective B3GALT6 causes EDSP2 and SEMDJL1;Defective B3GAT3 causes JDSSDHD;Defective B4GALT7 causes EDS, progeroid type;Defective CHST14 causes EDS, musculocontractural type;Defective CHST3 causes SEDCJD;Defective CHSY1 causes TPBS;Degr…	19;19;19;19;10;10;9;9;9;9;9;9;9;9;9;8;8;6;6;6;6;5;5;3;3;1;1;1;1;1;1;1	15;15;15;15;8;8;7;7;7;7;7;7;7;7;7;6;6;5;5;5;5;4;4;2;2;1;1;1;1;1;1;1	14;14;14;14;7;7;6;6;6;6;6;6;6;6;6;5;5;4;4;4;4;4;4;2;2;0;0;0;0;0;0;0
4169	ENSP00000161559_p.Y68C;ENSP00000384709_p.Y68C;ENSP00000161559;P13688;ENSP00000384709;P13688-2;P13688-8;P13688-10;ENSP00000244291_p.Y68C;ENSP00000351165_p.Y68C;ENSP00000384083_p.Y68C;ENSP00000471918_p.Y68C;ENSP00000244291;ENSP00000351165;P13688-6;P13688-5;ENSP00000384083;ENSP00000471918_p.A322G;ENSP00000471918;P13688-3;P13688-4;P13688-11;P13688-9;ENSP00000472633_p.Y28C;ENSP00000471566_p.Y28C;P1368…	ENSP00000161559_p.Y68C;ENSP00000384709_p.Y68C;ENSP00000161559;P13688;ENSP00000384709;P13688-2;P13688-8;P13688-10;ENSP00000244291_p.Y68C;ENSP00000351165_p.Y68C	Carcinoembryonic antigen-related cell adhesion molecule 1	CEACAM1	ENSP00000161559_p.Y68C;ENSP00000384709_p.Y68C;ENSP00000161559_p.Y68C;;ENSP00000384709_p.Y68C;;;;ENSP00000244291_p.Y68C;ENSP00000351165_p.Y68C;ENSP00000384083_p.Y68C;ENSP00000471918_p.Y68C;ENSP00000244291_p.Y68C;ENSP00000351165_p.Y68C;;;ENSP00000384083_p.Y68C;ENSP00000471918_p.A322G;ENSP00000471918_p.Y68C;ENSP00000471918_p.A322G;;;;;ENSP00000472633_p.Y28C;ENSP00000471566_p.Y28C;;;ENSP00000472633_p…	Alt	7.70419	9.10531	4.65439	9.12222	1.27718e-05	+		Cell surface interactions at the vascular wall;Extracellular matrix organization;Fibronectin matrix formation;Hemostasis;Immune System;Innate Immune System;Neutrophil degranulation	9;8;8;8;7;7;7;7;5;5;4;4;4;4;4;4;3;3;3;3;3;3;3;2;2;2;1;1;1;1	9;8;8;8;7;7;7;7;5;5;4;4;4;4;4;4;3;3;3;3;3;3;3;2;2;2;1;1;1;1	7;6;6;6;5;5;5;5;3;3;2;2;2;2;2;2;1;1;1;1;1;1;1;2;2;2;1;1;1;1
4203	ENSP00000414901_p.V189E;ENSP00000406994_p.V189E;ENSP00000377846_p.V210E;ENSP00000377845_p.V210E;ENSP00000175506_p.V210E;ENSP00000414379_p.V127E;ENSP00000408472_p.V127E;ENSP00000401651_p.V210E	ENSP00000414901_p.V189E;ENSP00000406994_p.V189E;ENSP00000377846_p.V210E;ENSP00000377845_p.V210E;ENSP00000175506_p.V210E;ENSP00000414379_p.V127E;ENSP00000408472_p.V127E;ENSP00000401651_p.V210E			ENSP00000414901_p.V189E;ENSP00000406994_p.V189E;ENSP00000377846_p.V210E;ENSP00000377845_p.V210E;ENSP00000175506_p.V210E;ENSP00000414379_p.V127E;ENSP00000408472_p.V127E;ENSP00000401651_p.V210E	Alt+Ref	9.38721	8.7487	-2.1211	9.47707	0.000372687	+			36;36;36;36;36;30;30;22	36;36;36;36;36;30;30;22	2;2;2;2;2;2;2;2
4226	ENSP00000498308;ENSP00000410256;ENSP00000189444;Q00653-4;Q00653-3;M0QZX1;ENSP00000470826	ENSP00000498308;ENSP00000410256;ENSP00000189444;Q00653-4;Q00653-3	Nuclear factor NF-kappa-B p100 subunit;Nuclear factor NF-kappa-B p52 subunit	NFKB2		Unspecific	9.47202	8.89409	-1.91985	9.57387	0.00110123	+	African trypanosomiasis;Allograft rejection;alpha-Linolenic acid metabolism;Aminoacyl-tRNA biosynthesis;Amoebiasis;Antigen processing and presentation;Arachidonic acid metabolism;Arginine and proline metabolism;Asthma;Autoimmune thyroid disease;B cell receptor signaling pathway;beta-Alanine metabolism;Breast cancer;Calcium signaling pathway;Cell adhesion molecules (CAMs);Chemical carcinogenesis;C…	Chromatin modifying enzymes;Chromatin organization;CLEC7A (Dectin-1) signaling;C-type lectin receptors (CLRs);Cytokine Signaling in Immune system;Cytosolic sensors of pathogen-associated DNA;DDX58/IFIH1-mediated induction of interferon-alpha/beta;Dectin-1 mediated noncanonical NF-kB signaling;DEx/H-box helicases activate type I IFN and inflammatory cytokines production;Disease;Diseases associated…	59;59;59;59;37;1;1	59;59;59;59;37;1;1	0;0;0;0;0;0;0
4230	ENSP00000493613_p.(L11_L19)del;ENSP00000361537_p.(L11_L19)del;ENSP00000191018_p.(L11_L19)del;ENSP00000493613;ENSP00000361537;ENSP00000346952_p.(L29_L37)del;ENSP00000191018;X6R5C5;ENSP00000493613_p.(11_19)insL_L;ENSP00000361537_p.(11_19)insL_L;ENSP00000346952;ENSP00000191018_p.(11_19)insL_L;ENSP00000346952_p.(29_37)insL_L;ENSP00000361562_p.(L29_L37)del;X6R8A1;ENSP00000361562;ENSP00000361562_p.(29_…	ENSP00000493613_p.(L11_L19)del;ENSP00000361537_p.(L11_L19)del;ENSP00000191018_p.(L11_L19)del;ENSP00000493613;ENSP00000361537;ENSP00000346952_p.(L29_L37)del;ENSP00000191018;X6R5C5;ENSP00000493613_p.(11_19)insL_L;ENSP00000361537_p.(11_19)insL_L;ENSP00000346952;ENSP00000191018_p.(11_19)insL_L;ENSP00000346952_p.(29_37)insL_L;ENSP00000361562_p.(L29_L37)del;X6R8A1;ENSP00000361562;ENSP00000361562_p.(29_…	Carboxypeptidase;Lysosomal protective protein;Lysosomal protective protein 32 kDa chain;Lysosomal protective protein 20 kDa chain	CTSA	ENSP00000493613_p.(L11_L19)del;ENSP00000361537_p.(L11_L19)del;ENSP00000191018_p.(L11_L19)del;ENSP00000493613_p.D294N;ENSP00000493613_p.(L11_L19)del;ENSP00000493613_p.(11_19)insL_L;ENSP00000361537_p.D294N;ENSP00000361537_p.(L11_L19)del;ENSP00000361537_p.(11_19)insL_L;ENSP00000346952_p.(L29_L37)del;ENSP00000191018_p.D294N;ENSP00000191018_p.(L11_L19)del;ENSP00000191018_p.(11_19)insL_L;;ENSP000004936…	Ref	8.31203	9.37285	3.52396	9.40905	0.000312847	+	Lysosome;Renin-angiotensin system	Adaptive Immune System;Asparagine N-linked glycosylation;Biosynthesis of the N-glycan precursor (dolichol lipid-linked oligosaccharide, LLO) and transfer to a nascent protein;Defective NEU1 causes sialidosis;Disease;Diseases associated with glycosylation precursor biosynthesis;Diseases of glycosylation;Glycosphingolipid metabolism;Immune System;Innate Immune System;Metabolism;Metabolism of lipids…	17;17;17;17;17;17;17;17;17;17;17;17;17;17;17;17;17;17;17;16;16;16;16;16;5;5;2;2;2;2;2;2;2;2;1;1;1;1	15;15;15;15;15;15;15;15;15;15;15;15;15;15;15;15;15;15;15;14;14;14;14;14;4;4;2;2;2;2;2;2;2;2;1;1;1;1	15;15;15;15;15;15;15;15;15;15;15;15;15;15;15;15;15;15;15;14;14;14;14;14;4;4;2;2;2;2;2;2;2;2;1;1;1;1
4231	ENSP00000192788_p.Q984H;ENSP00000192788_p.Q454R;ENSP00000192788_p.M1098T;ENSP00000192788_p.E930Q;ENSP00000192788;Q6BDS2;ENSP00000192788_p.F314L;H7C1J4;ENSP00000400628_p.Q984H;ENSP00000400628_p.Q454R;ENSP00000400628_p.M1098T;ENSP00000400628_p.E930Q;ENSP00000400628;ENSP00000400628_p.F314L	ENSP00000192788_p.Q984H;ENSP00000192788_p.Q454R;ENSP00000192788_p.M1098T;ENSP00000192788_p.E930Q;ENSP00000192788;Q6BDS2;ENSP00000192788_p.F314L;H7C1J4;ENSP00000400628_p.Q984H;ENSP00000400628_p.Q454R;ENSP00000400628_p.M1098T;ENSP00000400628_p.E930Q;ENSP00000400628;ENSP00000400628_p.F314L	UHRF1-binding protein 1	UHRF1BP1	ENSP00000192788_p.Q984H;ENSP00000192788_p.Q454R;ENSP00000192788_p.M1098T;ENSP00000192788_p.E930Q;ENSP00000192788_p.F314L;ENSP00000192788_p.Q454R;ENSP00000192788_p.Q984H;ENSP00000192788_p.E930Q;ENSP00000192788_p.M1098T;;ENSP00000192788_p.F314L;;ENSP00000400628_p.Q984H;ENSP00000400628_p.Q454R;ENSP00000400628_p.M1098T;ENSP00000400628_p.E930Q;ENSP00000400628_p.F314L;ENSP00000400628_p.Q454R;ENSP000004…	Ref	8.7206	9.77109	3.48965	9.80813	0.000298443	+			49;49;49;49;49;49;47;46;46;46;46;46;46;44	47;47;47;47;47;47;45;44;44;44;44;44;44;42	33;33;33;33;33;33;33;30;30;30;30;30;30;30
4246	ENSP00000199448;Q9UM22;ENSP00000413359;Q9UM22-3;ENSP00000409211;ENSP00000425858;D6RIH7;Q9UM22-2	ENSP00000199448;Q9UM22;ENSP00000413359;Q9UM22-3	Mammalian ependymin-related protein 1	EPDR1		Unspecific	6.76623	8.61001	6.12492	8.61619	8.20003e-07	+			7;7;4;4;2;2;2;2	5;5;3;3;2;2;2;2	5;5;3;3;2;2;2;2
4336	ENSP00000215794;Q9UMW8-2;Q9UMW8;ENSP00000215794_p.T169M;ENSP00000215794_p.R171L;ENSP00000292729_p.V46I;ENSP00000292729_p.N272S;ENSP00000292729_p.M119V;ENSP00000292729_p.L126V;ENSP00000292729;H7BXK0;ENSP00000414922_p.V99I;ENSP00000414922_p.N325S;ENSP00000414922_p.M172V;ENSP00000414922_p.L179V;ENSP00000414922;Q3LFD5	ENSP00000215794;Q9UMW8-2;Q9UMW8;ENSP00000215794_p.T169M;ENSP00000215794_p.R171L	Ubl carboxyl-terminal hydrolase 18	USP18	ENSP00000215794_p.R171L;ENSP00000215794_p.T169M;;;ENSP00000215794_p.T169M;ENSP00000215794_p.R171L;ENSP00000292729_p.V46I;ENSP00000292729_p.N272S;ENSP00000292729_p.M119V;ENSP00000292729_p.L126V;ENSP00000292729_p.N272S;ENSP00000292729_p.M119V;ENSP00000292729_p.V46I;ENSP00000292729_p.L126V;;ENSP00000414922_p.V99I;ENSP00000414922_p.N325S;ENSP00000414922_p.M172V;ENSP00000414922_p.L179V;ENSP00000414922…	Ref	7.10314	5.45693	-5.46856	7.11284	0.000221606	+		Antiviral mechanism by IFN-stimulated genes;Cytokine Signaling in Immune system;Deubiquitination;Immune System;Interferon alpha/beta signaling;Interferon Signaling;ISG15 antiviral mechanism;Metabolism of proteins;Post-translational protein modification;Regulation of IFNA signaling;Ub-specific processing proteases	5;5;5;4;4;2;2;2;2;2;2;2;2;2;2;2;2	5;5;5;4;4;2;2;2;2;2;2;2;2;2;2;2;2	4;4;4;3;3;1;1;1;1;1;1;1;1;1;1;1;1
4446	ENSP00000216968_p.S219G;ENSP00000216968;Q9UNN8;ENSP00000489117;A0A0U1RQQ4;ENSP00000489456;A0A0U1RRC4	ENSP00000216968_p.S219G;ENSP00000216968;Q9UNN8;ENSP00000489117;A0A0U1RQQ4	Endothelial protein C receptor	PROCR	ENSP00000216968_p.S219G;ENSP00000216968_p.S219G;;;;;	Unspecific	8.30606	6.66165	-5.46259	8.31579	5.69799e-05	+	Complement and coagulation cascades	Cell surface interactions at the vascular wall;Common Pathway of Fibrin Clot Formation;Formation of Fibrin Clot (Clotting Cascade);Hemostasis	5;5;5;4;4;2;2	5;5;5;4;4;2;2	5;5;5;4;4;2;2
4496	LRG_195p1;ENSP00000455552;ENSP00000219150;P31146;H3BRY3;ENSP00000456457;H3BTU6;ENSP00000457332;H3BRJ0;ENSP00000456266;H3BNA2;ENSP00000454752;H3BU76;ENSP00000457509;H3BSL1;ENSP00000456756	LRG_195p1;ENSP00000455552;ENSP00000219150;P31146;H3BRY3;ENSP00000456457	Coronin-1A;Coronin	CORO1A		Unspecific	10.1929	7.75679	-8.09262	10.1945	5.31907e-32	+	Phagosome;Tuberculosis		43;43;43;43;33;33;18;18;16;16;9;9;9;9;9;9	16;16;16;16;11;11;6;6;6;6;2;2;2;2;2;2	16;16;16;16;11;11;6;6;6;6;2;2;2;2;2;2
4537	ENSP00000220562;O43909;ENSP00000428691;E7ET85;ENSP00000429627;H0YBJ7;ENSP00000430652;E5RIV6;ENSP00000431013;E5RK02;ENSP00000428352;H0YB01	ENSP00000220562;O43909;ENSP00000428691;E7ET85	Exostosin-like 3	EXTL3		Unspecific	7.23147	8.88293	5.48604	8.89252	1.96739e-07	+	Glycosaminoglycan biosynthesis - heparan sulfate / heparin;Metabolic pathways	IRE1alpha activates chaperones;Metabolism of proteins;Unfolded Protein Response (UPR);XBP1(S) activates chaperone genes	34;34;18;18;8;8;2;2;2;2;1;1	34;34;18;18;8;8;2;2;2;2;1;1	8;8;5;5;0;0;0;0;0;0;1;1
4554	ENSP00000430476;ENSP00000428105;ENSP00000379256;ENSP00000310587;ENSP00000220931;Q91X97;P61601;D3YVA2;ENSP00000430476_p.L166M;ENSP00000428105_p.L166M;ENSP00000379256_p.L166M;ENSP00000310587_p.L166M;ENSP00000220931_p.L166M;ENSP00000430476_p.P177Q;ENSP00000430476_p.D176Y;ENSP00000428105_p.P177Q;ENSP00000428105_p.D176Y;ENSP00000379256_p.P177Q;ENSP00000379256_p.D176Y;ENSP00000310587_p.P177Q;ENSP000003…	ENSP00000430476;ENSP00000428105;ENSP00000379256;ENSP00000310587;ENSP00000220931;Q91X97;P61601;D3YVA2;ENSP00000430476_p.L166M;ENSP00000428105_p.L166M;ENSP00000379256_p.L166M;ENSP00000310587_p.L166M;ENSP00000220931_p.L166M;ENSP00000430476_p.P177Q;ENSP00000430476_p.D176Y;ENSP00000428105_p.P177Q;ENSP00000428105_p.D176Y;ENSP00000379256_p.P177Q;ENSP00000379256_p.D176Y;ENSP00000310587_p.P177Q;ENSP000003…	Neurocalcin-delta	Ncald;NCALD	ENSP00000430476_p.D176Y;ENSP00000430476_p.L166M;ENSP00000430476_p.P177Q;ENSP00000428105_p.D176Y;ENSP00000428105_p.L166M;ENSP00000428105_p.P177Q;ENSP00000379256_p.D176Y;ENSP00000379256_p.L166M;ENSP00000379256_p.P177Q;ENSP00000310587_p.D176Y;ENSP00000310587_p.L166M;ENSP00000310587_p.P177Q;ENSP00000220931_p.D176Y;ENSP00000220931_p.L166M;ENSP00000220931_p.P177Q;;;;ENSP00000430476_p.L166M;ENSP00000428…	Ref	6.95232	8.47849	5.06983	8.49123	0.000296622	+	Olfactory transduction	Activation of Ca-permeable Kainate Receptor;Activation of kainate receptors upon glutamate binding;Ionotropic activity of kainate receptors;Neuronal System;Neurotransmitter receptors and postsynaptic signal transmission;Transmission across Chemical Synapses	16;16;16;16;16;16;16;15;14;14;14;14;14;14;14;14;14;14;14;14;14;14;14;11;11;11;8;8;7;7;7;7;7;7;6;6;6;6;6;6;6;6;6;6;6;6;6;6;5;5;5;5;5;5;2;2	9;9;9;9;9;9;9;8;8;8;8;8;8;9;9;9;9;9;9;9;9;9;9;7;7;7;7;7;6;6;6;6;6;6;5;5;5;5;5;5;5;5;5;5;5;5;5;5;4;4;4;4;4;4;2;2	9;9;9;9;9;9;9;8;8;8;8;8;8;9;9;9;9;9;9;9;9;9;9;7;7;7;7;7;6;6;6;6;6;6;5;5;5;5;5;5;5;5;5;5;5;5;5;5;4;4;4;4;4;4;2;2
4560	ENSP00000221166_p.A475T;ENSP00000410137_p.A475T;ENSP00000221166_p.P439T;ENSP00000221166_p.G697R;ENSP00000221166_p.E589K;ENSP00000221166;P07197;ENSP00000410137_p.P439T;ENSP00000410137_p.G658R;ENSP00000410137_p.E589K;ENSP00000410137;E7ESP9;ENSP00000221166_p.K186Q;ENSP00000410137_p.K186Q;ENSP00000427872_p.A475T;ENSP00000427872_p.P439T;ENSP00000427872;E7EMV2;ENSP00000427872_p.K186Q	ENSP00000221166_p.A475T;ENSP00000410137_p.A475T;ENSP00000221166_p.P439T;ENSP00000221166_p.G697R;ENSP00000221166_p.E589K;ENSP00000221166;P07197;ENSP00000410137_p.P439T;ENSP00000410137_p.G658R;ENSP00000410137_p.E589K;ENSP00000410137;E7ESP9;ENSP00000221166_p.K186Q;ENSP00000410137_p.K186Q;ENSP00000427872_p.A475T;ENSP00000427872_p.P439T;ENSP00000427872;E7EMV2;ENSP00000427872_p.K186Q	Neurofilament medium polypeptide	NEFM	ENSP00000221166_p.A475T;ENSP00000410137_p.A475T;ENSP00000221166_p.P439T;ENSP00000221166_p.G697R;ENSP00000221166_p.E589K;ENSP00000221166_p.A475T;ENSP00000221166_p.K186Q;ENSP00000221166_p.P439T;ENSP00000221166_p.E589K;ENSP00000221166_p.G697R;;ENSP00000410137_p.P439T;ENSP00000410137_p.G658R;ENSP00000410137_p.E589K;ENSP00000410137_p.A475T;ENSP00000410137_p.K186Q;ENSP00000410137_p.P439T;ENSP0000041013…	Alt	8.96019	7.72432	-4.1055	8.98472	1.28598e-05	+	Amyotrophic lateral sclerosis (ALS)		47;46;46;46;46;46;46;45;45;45;45;45;44;43;38;37;37;37;35	43;42;42;42;42;42;42;41;41;41;41;41;40;39;34;33;33;33;31	2;2;2;2;2;2;2;2;2;2;2;2;2;2;2;2;2;2;2
4565	LRG_165p1_p.I526V;LRG_165p1;ENSP00000221283_p.I526V;ENSP00000221283;Q15833;ENSP00000409471_p.I523V;ENSP00000409471;LRG_165p1_p.G17R;ENSP00000221283_p.G17R;ENSP00000413606_p.I537V;ENSP00000413606;Q15833-2;Q15833-3;ENSP00000409471_p.G17R;ENSP00000413606_p.G17R;ENSP00000471737;M0R1A1;ENSP00000473040_p.M148T;ENSP00000473040;M0R376	LRG_165p1_p.I526V;LRG_165p1;ENSP00000221283_p.I526V;ENSP00000221283;Q15833;ENSP00000409471_p.I523V;ENSP00000409471;LRG_165p1_p.G17R;ENSP00000221283_p.G17R;ENSP00000413606_p.I537V;ENSP00000413606;Q15833-2;Q15833-3;ENSP00000409471_p.G17R;ENSP00000413606_p.G17R	Syntaxin-binding protein 2	STXBP2	LRG_165p1_p.I526V;LRG_165p1_p.A433V;LRG_165p1_p.G17R;LRG_165p1_p.I526V;ENSP00000221283_p.I526V;ENSP00000221283_p.A433V;ENSP00000221283_p.G17R;ENSP00000221283_p.I526V;;ENSP00000409471_p.I523V;ENSP00000409471_p.A430V;ENSP00000409471_p.G17R;ENSP00000409471_p.I523V;LRG_165p1_p.G17R;ENSP00000221283_p.G17R;ENSP00000413606_p.I537V;ENSP00000413606_p.A444V;ENSP00000413606_p.G17R;ENSP00000413606_p.I537V;;;…	Alt+Ref	9.10201	8.14206	-3.18889	9.1472	0.000470079	+		Cytokine Signaling in Immune system;Hemostasis;Immune System;Other interleukin signaling;Platelet activation, signaling and aggregation;Platelet degranulation;Response to elevated platelet cytosolic Ca2+;Signaling by Interleukins	31;31;31;31;31;30;30;30;30;30;30;30;30;29;29;12;12;4;4;4	30;30;30;30;30;29;29;29;29;29;29;29;29;28;28;11;11;4;4;4	1;1;1;1;1;1;1;1;1;1;1;1;1;1;1;1;1;1;1;1
4639	ENSP00000222792;P52757;ENSP00000222792_p.D70E;ENSP00000495614_p.N92D;ENSP00000495614;A0A2R8YEI5;P52757-9;ENSP00000495614_p.D145E;Q3V2R3;P52757-8;ENSP00000486515;P52757-3;ENSP00000394284;P52757-5;P52757-4;ENSP00000438587;B3VCG5;H7BXA9;Q80XD1-3;Q80XD1-2;P52757-7;Q80XD1;ENSP00000438587_p.D70E;ENSP00000386849;B3VCF5;A0A0N4SVT0;ENSP00000398326;H7C138;ENSP00000386968;B8ZZU1;ENSP00000406337;B3VCF4;A0A0N…	ENSP00000222792;P52757;ENSP00000222792_p.D70E;ENSP00000495614_p.N92D;ENSP00000495614;A0A2R8YEI5;P52757-9;ENSP00000495614_p.D145E;Q3V2R3;P52757-8;ENSP00000486515;P52757-3;ENSP00000394284;P52757-5;P52757-4	Beta-chimaerin	CHN2;Chn2	ENSP00000222792_p.D70E;;ENSP00000222792_p.D70E;ENSP00000495614_p.N92D;ENSP00000495614_p.D145E;ENSP00000495614_p.N92D;;;ENSP00000495614_p.D145E;;;;;;;;ENSP00000438587_p.D70E;;;;;;;ENSP00000438587_p.D70E;;;;;;ENSP00000386968_p.D83E;;;;;;;ENSP00000386968_p.D83E;;;ENSP00000409843_p.N92D;ENSP00000409843_p.D145E;ENSP00000409843_p.N92D;;;;;;ENSP00000409843_p.D145E;;	Ref	6.80618	8.53538	5.74427	8.5434	4.08009e-06	+		Rho GTPase cycle;Signal Transduction;Signaling by Rho GTPases	20;20;19;19;19;19;19;18;15;14;12;12;10;10;10;8;8;8;8;8;8;8;7;7;7;7;6;6;6;6;6;6;6;6;6;5;5;5;5;5;5;5;5;5;5;4;2;2	20;20;19;19;19;19;19;18;15;14;12;12;10;10;10;8;8;8;8;8;8;8;7;7;7;7;6;6;6;6;6;6;6;6;6;5;5;5;5;5;5;5;5;5;5;4;2;2	20;20;19;19;19;19;19;18;15;14;12;12;10;10;10;8;8;8;8;8;8;8;7;7;7;7;6;6;6;6;6;6;6;6;6;5;5;5;5;5;5;5;5;5;5;4;2;2
4719	ENSP00000225941_p.F209S;ENSP00000225941_p.R44Q;ENSP00000225941;Q9P2A4	ENSP00000225941_p.F209S;ENSP00000225941_p.R44Q;ENSP00000225941;Q9P2A4	ABI gene family member 3	ABI3	ENSP00000225941_p.F209S;ENSP00000225941_p.R44Q;ENSP00000225941_p.F209S;ENSP00000225941_p.R44Q;	Alt	8.46359	6.63943	-6.05975	8.47005	4.39737e-08	+			17;16;16;16	17;16;16;16	1;1;1;1
4720	LRG_1p1_p.A1075T;ENSP00000225964_p.A1075T;P02452	LRG_1p1_p.A1075T;ENSP00000225964_p.A1075T;P02452	Collagen alpha-1(I) chain	COL1A1	LRG_1p1_p.A1075T;ENSP00000225964_p.A1075T;	Alt+Ref	10.2994	9.11309	-3.94076	10.3268	3.7805e-09	+			84;84;84	2;2;2	2;2;2
4793	ENSP00000228928_p.R65W;ENSP00000228928_p.R18K;ENSP00000228928;Q9Y6K5;ENSP00000448388_p.R65W;F8VS35;ENSP00000448388_p.R18K;ENSP00000448388;ENSP00000449299_p.R65W;F8VWK9;ENSP00000449299_p.R18K;ENSP00000449299;ENSP00000447323;H0YHL3	ENSP00000228928_p.R65W;ENSP00000228928_p.R18K;ENSP00000228928;Q9Y6K5	2-5-oligoadenylate synthase 3	OAS3	ENSP00000228928_p.R65W;ENSP00000228928_p.R18K;ENSP00000228928_p.R65W;ENSP00000228928_p.R18K;;ENSP00000448388_p.R65W;;ENSP00000448388_p.R18K;ENSP00000448388_p.R65W;ENSP00000448388_p.R18K;ENSP00000449299_p.R65W;;ENSP00000449299_p.R18K;ENSP00000449299_p.R65W;ENSP00000449299_p.R18K;;	Alt	9.65852	8.61203	-3.47637	9.69588	2.51963e-06	+	Epstein-Barr virus infection;Hepatitis C;Herpes simplex virus 1 infection;Influenza A;Measles;NOD-like receptor signaling pathway	Antiviral mechanism by IFN-stimulated genes;Cytokine Signaling in Immune system;Immune System;Interferon alpha/beta signaling;Interferon gamma signaling;Interferon Signaling;OAS antiviral response	62;61;61;61;14;13;13;13;9;8;8;8;5;5	62;61;61;61;14;13;13;13;9;8;8;8;5;5	58;57;57;57;13;12;12;12;9;8;8;8;5;5
4794	ENSP00000445907_p.T102A;ENSP00000445907;ENSP00000228938_p.T127A;ENSP00000228938;P08493;P08493-2	ENSP00000445907_p.T102A;ENSP00000445907;ENSP00000228938_p.T127A;ENSP00000228938;P08493;P08493-2	Matrix Gla protein	MGP	ENSP00000445907_p.T102A;ENSP00000445907_p.T102A;ENSP00000228938_p.T127A;ENSP00000228938_p.T127A;;	Unspecific	7.39744	9.50917	7.01503	9.51252	9.02091e-12	+			4;4;4;4;4;4	4;4;4;4;4;4	3;3;3;3;3;3
4795	ENSP00000444860;ENSP00000440560;ENSP00000228945;P52566;F5H3P3;ENSP00000445263;F5H6Q0;ENSP00000437454;F5H2R5;ENSP00000445450	ENSP00000444860;ENSP00000440560;ENSP00000228945;P52566;F5H3P3;ENSP00000445263;F5H6Q0;ENSP00000437454;F5H2R5;ENSP00000445450	Rho GDP-dissociation inhibitor 2	ARHGDIB		Unspecific	9.78052	8.6109	-3.88537	9.80896	1.84352e-07	+	Neurotrophin signaling pathway;Vasopressin-regulated water reabsorption	Rho GTPase cycle;Signal Transduction;Signaling by Rho GTPases	19;19;19;19;15;15;12;12;10;10	12;12;12;12;11;11;10;10;8;8	4;4;4;4;4;4;4;4;2;2
4837	ENSP00000230173_p.Q1127R;ENSP00000230173;Q86SQ4;ENSP00000230173_p.K230Q;ENSP00000296932_p.Q1099R;ENSP00000296932;Q86SQ4-2;ENSP00000296932_p.K230Q;A0A140LIH4;A0A571BEJ4;Q6F3F9;F5H2L1;ENSP00000446287;ENSP00000444123;H0YGP2;ENSP00000446287_p.K229Q;ENSP00000439371_p.T89M;ENSP00000439371;H0YFM8;F5H054;ENSP00000438366	ENSP00000230173_p.Q1127R;ENSP00000230173;Q86SQ4;ENSP00000230173_p.K230Q;ENSP00000296932_p.Q1099R;ENSP00000296932;Q86SQ4-2;ENSP00000296932_p.K230Q	G-protein coupled receptor 126	GPR126	ENSP00000230173_p.Q1127R;ENSP00000230173_p.Q1127R;ENSP00000230173_p.K230Q;;ENSP00000230173_p.K230Q;ENSP00000296932_p.Q1099R;ENSP00000296932_p.Q1099R;ENSP00000296932_p.K230Q;;ENSP00000296932_p.K230Q;;;;;ENSP00000446287_p.K229Q;;;ENSP00000446287_p.K229Q;ENSP00000439371_p.T89M;ENSP00000439371_p.T89M;;;	Unspecific	7.17767	8.55193	4.56519	8.56989	0.000311104	+			28;28;28;27;26;26;26;25;9;9;9;3;3;2;2;2;1;1;1;1;1	28;28;28;27;26;26;26;25;9;9;9;3;3;2;2;2;1;1;1;1;1	3;3;3;3;3;3;3;3;0;0;0;0;0;0;0;0;0;0;0;0;0
4847	ENSP00000230685;P04233-2	ENSP00000230685;P04233-2	HLA class II histocompatibility antigen gamma chain	CD74		Unspecific	9.395	7.10486	-7.60768	9.39722	1.10161e-19	+	Antigen processing and presentation;Herpes simplex virus 1 infection;Tuberculosis	Adaptive Immune System;Cell surface interactions at the vascular wall;Hemostasis;Immune System;MHC class II antigen presentation	9;9	9;9	1;1
4852	ENSP00000492324_p.R158Q;ENSP00000492324;ENSP00000231004_p.R158Q;ENSP00000231004;P28300;H0YAL3;ENSP00000427538	ENSP00000492324_p.R158Q;ENSP00000492324;ENSP00000231004_p.R158Q;ENSP00000231004;P28300	Protein-lysine 6-oxidase	LOX	ENSP00000492324_p.R158Q;ENSP00000492324_p.R158Q;ENSP00000231004_p.R158Q;ENSP00000231004_p.R158Q;;;	Unspecific	9.25391	8.26921	-3.27113	9.29672	3.22774e-05	+		Assembly of collagen fibrils and other multimeric structures;Collagen formation;Crosslinking of collagen fibrils;Elastic fibre formation;Extracellular matrix organization	21;21;21;21;21;3;3	21;21;21;21;21;3;3	11;11;11;11;11;1;1
4923	ENSP00000233668;Q99704;ENSP00000387016;Q99704-3;ENSP00000344330;Q99704-2;ENSP00000393586;H7C093	ENSP00000233668;Q99704;ENSP00000387016;Q99704-3	Docking protein 1	DOK1		Unspecific	8.69339	7.3487	-4.46697	8.7126	0.000215815	+		Axon guidance;Developmental Biology;PTK6 Regulates RTKs and Their Effectors AKT1 and DOK1;RET signaling;Signal Transduction;Signaling by Non-Receptor Tyrosine Kinases;Signaling by PTK6	27;27;21;21;6;6;3;3	27;27;21;21;6;6;3;3	20;20;17;17;3;3;2;2
4928	ENSP00000233813;P24593;Q07079;ENSP00000413474;C9JXX4	ENSP00000233813;P24593;Q07079;ENSP00000413474;C9JXX4	Insulin-like growth factor-binding protein 5	IGFBP5;Igfbp5		Unspecific	9.50146	8.67044	-2.76059	9.56124	6.88019e-06	+		Metabolism of proteins;Post-translational protein modification;Post-translational protein phosphorylation;Regulation of Insulin-like Growth Factor (IGF) transport and uptake by Insulin-like Growth Factor Binding Proteins (IGFBPs)	22;22;19;13;13	22;22;19;13;13	22;22;19;13;13
4962	ENSP00000411103_p.S823T;ENSP00000411103_p.D82E;ENSP00000411103;ENSP00000341621_p.S823T;ENSP00000341621_p.D82E;ENSP00000341621;ENSP00000312352_p.S1024T;ENSP00000312352_p.D283E;ENSP00000312352;ENSP00000235372_p.S1024T;ENSP00000235372_p.D283E;ENSP00000235372;Q13029-5;Q13029-3;Q13029-2;Q13029;ENSP00000411103_p.(502_502)insP_P;ENSP00000341621_p.(502_502)insP_P;ENSP00000312352_p.(703_703)insP_P;ENSP000…	ENSP00000411103_p.S823T;ENSP00000411103_p.D82E;ENSP00000411103;ENSP00000341621_p.S823T;ENSP00000341621_p.D82E;ENSP00000341621;ENSP00000312352_p.S1024T;ENSP00000312352_p.D283E;ENSP00000312352;ENSP00000235372_p.S1024T;ENSP00000235372_p.D283E;ENSP00000235372;Q13029-5;Q13029-3;Q13029-2;Q13029;ENSP00000411103_p.(502_502)insP_P;ENSP00000341621_p.(502_502)insP_P;ENSP00000312352_p.(703_703)insP_P;ENSP000…	PR domain zinc finger protein 2	PRDM2	ENSP00000411103_p.S823T;ENSP00000411103_p.D82E;ENSP00000411103_p.(502_502)insP_P;ENSP00000411103_p.D82E;ENSP00000411103_p.S823T;ENSP00000341621_p.S823T;ENSP00000341621_p.D82E;ENSP00000341621_p.(502_502)insP_P;ENSP00000341621_p.D82E;ENSP00000341621_p.S823T;ENSP00000312352_p.S1024T;ENSP00000312352_p.D283E;ENSP00000312352_p.(703_703)insP_P;ENSP00000312352_p.D283E;ENSP00000312352_p.S1024T;ENSP0000023…	Ref	9.7514	8.16514	-5.26942	9.76252	4.11264e-12	+	Lysine degradation;Metabolic pathways		25;25;25;25;25;25;25;25;25;25;25;25;25;25;25;25;24;24;24;24	25;25;25;25;25;25;25;25;25;25;25;25;25;25;25;25;24;24;24;24	15;15;15;15;15;15;15;15;15;15;15;15;15;15;15;15;14;14;14;14
5017	ENSP00000238561_p.I499L;ENSP00000238561;Q86TW2-2;Q86TW2;ENSP00000238561_p.A451T;ENSP00000339663_p.I431L;ENSP00000339663;Q86TW2-3;ENSP00000339663_p.A383T;G3V426;ENSP00000451549;F8W9Q8;ENSP00000377256;ENSP00000377256_p.(206_210)insT_T;G3V3J2;ENSP00000451271	ENSP00000238561_p.I499L;ENSP00000238561;Q86TW2-2;Q86TW2;ENSP00000238561_p.A451T;ENSP00000339663_p.I431L;ENSP00000339663;Q86TW2-3;ENSP00000339663_p.A383T;G3V426;ENSP00000451549	Uncharacterized aarF domain-containing protein kinase 1	ADCK1	ENSP00000238561_p.I499L;ENSP00000238561_p.A451T;ENSP00000238561_p.I499L;;;ENSP00000238561_p.A451T;ENSP00000339663_p.I431L;ENSP00000339663_p.A383T;ENSP00000339663_p.I431L;;ENSP00000339663_p.A383T;;;;ENSP00000377256_p.(206_210)insT_T;ENSP00000377256_p.(206_210)insT_T;;	Ref	7.12419	8.83019	5.66722	8.83865	7.37415e-08	+			22;22;22;22;21;16;16;16;15;12;12;10;10;10;3;3	22;22;22;22;21;16;16;16;15;12;12;10;10;10;3;3	16;16;16;16;15;12;12;12;11;7;7;6;6;6;3;3
5100	ENSP00000366945_p.F229C;ENSP00000366945;ENSP00000242275_p.F229C;ENSP00000242275;Q9H1U9	ENSP00000366945_p.F229C;ENSP00000366945;ENSP00000242275_p.F229C;ENSP00000242275;Q9H1U9	Solute carrier family 25 member 51	SLC25A51	ENSP00000366945_p.F229C;ENSP00000366945_p.F229C;ENSP00000242275_p.F229C;ENSP00000242275_p.F229C;	Unspecific	7.58706	8.77168	3.93522	8.79918	0.000245686	+			17;17;17;17;17	17;17;17;17;17	5;5;5;5;5
5151	ENSP00000244043_p.R21_R23del;ENSP00000244043;Q16647	ENSP00000244043_p.R21_R23del;ENSP00000244043;Q16647	Prostacyclin synthase	PTGIS	ENSP00000244043_p.R21_R23del;ENSP00000244043_p.R21_R23del;	Unspecific	7.44454	8.99924	5.16461	9.01118	5.18606e-07	+	Arachidonic acid metabolism;Metabolic pathways	Arachidonic acid metabolism;Bile acid and bile salt metabolism;Biological oxidations;Cytochrome P450 - arranged by substrate type;Eicosanoids;Endogenous sterols;Fatty acid metabolism;Metabolism;Metabolism of lipids;Metabolism of steroids;Metabolism of vitamins and cofactors;Metabolism of water-soluble vitamins and cofactors;Nicotinamide salvaging;Nicotinate metabolism;Phase I - Functionalization …	21;21;21	15;15;15	15;15;15
5188	H3BRL0;ENSP00000456289_p.S70N;ENSP00000456289;ENSP00000245157_p.S70N;ENSP00000245157;Q9BXC9;Q9CWF6;J3QLW0;ENSP00000463731;ENSP00000463176;J3QKP7;H3BQ79;ENSP00000455651;ENSP00000454986;H3BNS7	H3BRL0;ENSP00000456289_p.S70N;ENSP00000456289;ENSP00000245157_p.S70N;ENSP00000245157;Q9BXC9	Bardet-Biedl syndrome 2 protein	BBS2	;ENSP00000456289_p.S70N;ENSP00000456289_p.S70N;ENSP00000245157_p.S70N;ENSP00000245157_p.S70N;;;;;;;;;;	Unspecific	6.57769	8.28354	5.66669	8.292	0.000356693	+		BBSome-mediated cargo-targeting to cilium;Cargo trafficking to the periciliary membrane;Cilium Assembly;Organelle biogenesis and maintenance	20;20;20;20;20;20;9;8;8;6;6;3;3;2;2	20;20;20;20;20;20;9;8;8;6;6;3;3;2;2	20;20;20;20;20;20;9;8;8;6;6;3;3;2;2
5206	ENSP00000245796_p.G269A;ENSP00000245796;Q8NDX1;ENSP00000413997_p.G269A;ENSP00000413997;Q8NDX1-2	ENSP00000245796_p.G269A;ENSP00000245796;Q8NDX1;ENSP00000413997_p.G269A;ENSP00000413997;Q8NDX1-2	PH and SEC7 domain-containing protein 4	PSD4	ENSP00000245796_p.G269A;ENSP00000245796_p.G269A;;ENSP00000413997_p.G269A;ENSP00000413997_p.G269A;	Unspecific	8.28159	5.91944	-7.84688	8.28347	1.17543e-08	+	Endocytosis		29;29;29;26;26;26	29;29;29;26;26;26	24;24;24;21;21;21
5320	LRG_97p1;ENSP00000249071;Q05144;P15153;ENSP00000385590;B1AH80;ENSP00000403778;B1AH78;A0A2R8VHH0	LRG_97p1;ENSP00000249071;Q05144;P15153;ENSP00000385590;B1AH80;ENSP00000403778;B1AH78;A0A2R8VHH0	Ras-related C3 botulinum toxin substrate 2	Rac2;RAC2		Unspecific	9.62302	7.91296	-5.68071	9.63141	9.76664e-14	+	Adherens junction;Axon guidance;B cell receptor signaling pathway;cAMP signaling pathway;Chemokine signaling pathway;Choline metabolism in cancer;Colorectal cancer;Fc epsilon RI signaling pathway;Fc gamma R-mediated phagocytosis;Fluid shear stress and atherosclerosis;Focal adhesion;Human cytomegalovirus infection;Human immunodeficiency virus 1 infection;Leukocyte transendothelial migration;MAPK s…	Beta-catenin independent WNT signaling;Constitutive Signaling by Aberrant PI3K in Cancer;Disease;Diseases of signal transduction;GPVI-mediated activation cascade;Hemostasis;Immune System;Innate Immune System;Intracellular signaling by second messengers;Negative regulation of the PI3K/AKT network;PCP/CE pathway;PI3K/AKT Signaling in Cancer;PI5P, PP2A and IER3 Regulate PI3K/AKT Signaling;PIP3 activ…	13;13;13;13;12;12;11;11;9	5;5;5;5;5;5;4;4;3	0;0;0;0;0;0;0;0;0
5341	ENSP00000249806_p.K158Q;ENSP00000249806;Q9NWW5;ENSP00000490057;A0A1B0GUD2;H3BUT1;ENSP00000457783;H3BTY4;ENSP00000457384;ENSP00000490373_p.K158Q;ENSP00000490373;A0A0S2Z5D0;H3BUV4;ENSP00000457822_p.K158Q;ENSP00000457822;ENSP00000489843_p.K125Q;ENSP00000489843;A0A1B0GTU6;ENSP00000490807;ENSP00000490546;A0A1B0GW73;H3BNF1;ENSP00000454818;ENSP00000489851;A0A1B0GTV3;H3BRN7;ENSP00000456336	ENSP00000249806_p.K158Q;ENSP00000249806;Q9NWW5;ENSP00000490057;A0A1B0GUD2;H3BUT1;ENSP00000457783;H3BTY4;ENSP00000457384;ENSP00000490373_p.K158Q;ENSP00000490373;A0A0S2Z5D0;H3BUV4;ENSP00000457822_p.K158Q;ENSP00000457822;ENSP00000489843_p.K125Q;ENSP00000489843;A0A1B0GTU6	Ceroid-lipofuscinosis neuronal protein 6	CLN6	ENSP00000249806_p.K158Q;ENSP00000249806_p.K158Q;;;;;;;;ENSP00000490373_p.K158Q;ENSP00000490373_p.K158Q;;;ENSP00000457822_p.K158Q;ENSP00000457822_p.K158Q;ENSP00000489843_p.K125Q;ENSP00000489843_p.K125Q;;;;;;;;;;	Unspecific	7.787	8.83169	3.47036	8.8692	0.00134412	+			7;7;7;6;6;6;6;5;5;4;4;4;4;4;4;4;4;4;3;3;3;3;3;3;3;2;2	7;7;7;6;6;6;6;5;5;4;4;4;4;4;4;4;4;4;3;3;3;3;3;3;3;2;2	2;2;2;2;2;2;2;2;2;2;2;2;2;2;2;2;2;2;2;2;2;2;2;2;2;2;2
5380	ENSP00000251119_p.N1891S;Q68DK2;ENSP00000251119;Q68DK2-2;ENSP00000251119_p.S1040T;ENSP00000251119_p.T898S;Q68DK2-5;ENSP00000450603_p.N1891S;G3V2D8;ENSP00000450603;ENSP00000450603_p.T898S;ENSP00000450603_p.S1040T;Q68DK2-4;Q68DK2-3;G3V230;ENSP00000450431;ENSP00000452142;A0A2H2FF08;REV__A0A1B0GSQ2;REV__ENSP00000487488_p.S185L;REV__ENSP00000487488_p.R448S;REV__ENSP00000487488;REV__A0A0D9SGH2;REV__Q9U…	ENSP00000251119_p.N1891S;Q68DK2;ENSP00000251119;Q68DK2-2;ENSP00000251119_p.S1040T;ENSP00000251119_p.T898S;Q68DK2-5;ENSP00000450603_p.N1891S;G3V2D8;ENSP00000450603;ENSP00000450603_p.T898S;ENSP00000450603_p.S1040T	Zinc finger FYVE domain-containing protein 26	ZFYVE26	ENSP00000251119_p.N1891S;;ENSP00000251119_p.N1891S;ENSP00000251119_p.S1040T;ENSP00000251119_p.T898S;;ENSP00000251119_p.S1040T;ENSP00000251119_p.T898S;;ENSP00000450603_p.N1891S;;ENSP00000450603_p.N1891S;ENSP00000450603_p.S1040T;ENSP00000450603_p.T898S;ENSP00000450603_p.T898S;ENSP00000450603_p.S1040T;;;;;;;;;;;;;;;;;;;;;;	Alt	7.25181	8.67938	4.74229	8.69531	0.000398932	+			72;72;71;71;70;70;68;60;59;59;58;58;20;19;12;12;9;9;1;1;1;1;1;1;1;1;1;1;1;1;1;1;1;1	72;72;71;71;70;70;68;60;59;59;58;58;20;19;12;12;9;9;1;1;1;1;1;1;1;1;1;1;1;1;1;1;1;1	58;58;57;57;56;56;55;51;50;50;49;49;19;10;12;12;4;4;0;0;0;0;0;0;0;0;0;0;0;0;0;0;0;0
5443	ENSP00000252486;P02649;ENSP00000413653_p.N14K;ENSP00000413135;E9PEV4;ENSP00000410423;E7ERP7;B2RXB2	ENSP00000252486;P02649;ENSP00000413653_p.N14K;ENSP00000413135;E9PEV4;ENSP00000410423;E7ERP7	Apolipoprotein E	APOE	ENSP00000252486_p.C130R;;ENSP00000413653_p.N14K;ENSP00000413135_p.C130R;;ENSP00000410423_p.C130R;;	Alt+Ref	7.17744	8.73161	5.16287	8.74357	0.000108329	+	Alzheimer disease;Cholesterol metabolism	Binding and Uptake of Ligands by Scavenger Receptors;Chylomicron assembly;Chylomicron clearance;Chylomicron remodeling;G alpha (i) signalling events;Gene expression (Transcription);Generic Transcription Pathway;GPCR downstream signalling;HDL remodeling;Metabolism;Metabolism of fat-soluble vitamins;Metabolism of proteins;Metabolism of vitamins and cofactors;NR1H2 and NR1H3-mediated signaling;NR1H3…	38;38;27;23;23;23;23;1	1;1;1;1;1;1;1;0	0;0;0;0;0;0;0;0
5444	ENSP00000252486_p.C130R	ENSP00000252486_p.C130R			ENSP00000252486_p.C130R	Alt+Ref	9.23996	10.5061	4.20592	10.529	5.57185e-10	+			39	39	0
5451	ENSP00000252593;Q10589;Q10589-2	ENSP00000252593;Q10589;Q10589-2	Bone marrow stromal antigen 2	BST2		Unspecific	9.25299	7.42752	-6.06407	9.25943	1.48157e-10	+	Herpes simplex virus 1 infection;Human immunodeficiency virus 1 infection	Cytokine Signaling in Immune system;Immune System;Innate Immune System;Interferon alpha/beta signaling;Interferon Signaling;Neutrophil degranulation	6;6;5	6;6;5	6;6;5
5466	ENSP00000252809_p.H202D;ENSP00000470531_p.V9L;ENSP00000470531;A0A0A0MTT8;ENSP00000470531_p.S48T	ENSP00000252809_p.H202D			ENSP00000252809_p.H202D;ENSP00000470531_p.V9L;ENSP00000470531_p.S48T;ENSP00000470531_p.V9L;;ENSP00000470531_p.S48T	Alt+Ref	7.43391	9.12714	5.62482	9.13586	9.95535e-08	+	Cytokine-cytokine receptor interaction		20;6;6;6;5	20;6;6;6;5	1;0;0;0;0
5505	ENSP00000384537_p.K117E;ENSP00000253332_p.K117E;ENSP00000384537;ENSP00000253332;Q02952;ENSP00000352794_p.K12E;ENSP00000346702_p.K19E;ENSP00000384537_p.S887C;ENSP00000253332_p.S887C;ENSP00000384537_p.G30S;ENSP00000253332_p.G30S;ENSP00000352794;ENSP00000346702;Q02952-3;Q02952-2;ENSP00000352794_p.S782C;ENSP00000346702_p.S789C	ENSP00000384537_p.K117E;ENSP00000253332_p.K117E;ENSP00000384537;ENSP00000253332;Q02952;ENSP00000352794_p.K12E;ENSP00000346702_p.K19E;ENSP00000384537_p.S887C;ENSP00000253332_p.S887C;ENSP00000384537_p.G30S;ENSP00000253332_p.G30S;ENSP00000352794;ENSP00000346702;Q02952-3;Q02952-2;ENSP00000352794_p.S782C;ENSP00000346702_p.S789C	A-kinase anchor protein 12	AKAP12	ENSP00000384537_p.K117E;ENSP00000253332_p.K117E;ENSP00000384537_p.(1531_1531)insE_E;ENSP00000384537_p.E1600D;ENSP00000384537_p.G30S;ENSP00000384537_p.K117E;ENSP00000384537_p.K216Q;ENSP00000384537_p.P1183R;ENSP00000384537_p.S887C;ENSP00000253332_p.(1531_1531)insE_E;ENSP00000253332_p.E1600D;ENSP00000253332_p.G30S;ENSP00000253332_p.K117E;ENSP00000253332_p.K216Q;ENSP00000253332_p.P1183R;ENSP000002533…	Alt+Ref	8.38995	10.0205	5.41665	10.0306	1.89362e-09	+			114;114;112;112;112;111;111;111;111;111;111;109;109;109;109;108;108	114;114;112;112;112;111;111;111;111;111;111;109;109;109;109;108;108	2;2;0;0;0;2;2;0;0;0;0;0;0;0;0;0;0
5524	ENSP00000253719_p.I40T;ENSP00000253719_p.A310T;ENSP00000253719;O96009;M0QXC5;ENSP00000469061_p.I40T;ENSP00000469061;ENSP00000469763_p.I40T;ENSP00000469763;A0A0B4J2A8	ENSP00000253719_p.I40T;ENSP00000253719_p.A310T;ENSP00000253719;O96009;M0QXC5;ENSP00000469061_p.I40T;ENSP00000469061	Napsin-A	NAPSA	ENSP00000253719_p.I40T;ENSP00000253719_p.A310T;ENSP00000253719_p.A310T;ENSP00000253719_p.I40T;;;ENSP00000469061_p.I40T;ENSP00000469061_p.I40T;ENSP00000469763_p.I40T;ENSP00000469763_p.I40T;	Unspecific	8.99899	7.9215	-3.57934	9.03388	5.23671e-06	+	Lysosome	Metabolism of proteins;Surfactant metabolism	7;7;7;7;6;6;6;1;1;1	5;5;5;5;4;4;4;1;1;1	5;5;5;5;4;4;4;1;1;1
5563	ENSP00000254528;Q9BXX0	ENSP00000254528;Q9BXX0	EMILIN-2	EMILIN2		Unspecific	7.56392	9.07602	5.02309	9.08918	2.24446e-06	+		Elastic fibre formation;Extracellular matrix organization;Molecules associated with elastic fibres	40;40	28;28	28;28
5615	ENSP00000255381_p.K1911E;ENSP00000255381_p.I1106M;ENSP00000255381_p.E1209K;ENSP00000255381;Q9Y623;ENSP00000255381_p.R1612K;ENSP00000255381_p.R24Q;ENSP00000255381_p.D1802G	ENSP00000255381_p.K1911E;ENSP00000255381_p.I1106M;ENSP00000255381_p.E1209K;ENSP00000255381;Q9Y623;ENSP00000255381_p.R1612K;ENSP00000255381_p.R24Q;ENSP00000255381_p.D1802G	Myosin-4	MYH4	ENSP00000255381_p.K1911E;ENSP00000255381_p.I1106M;ENSP00000255381_p.E1209K;ENSP00000255381_p.D1802G;ENSP00000255381_p.K1911E;ENSP00000255381_p.R1612K;ENSP00000255381_p.R24Q;ENSP00000255381_p.E1209K;ENSP00000255381_p.I1106M;;ENSP00000255381_p.R1612K;ENSP00000255381_p.R24Q;ENSP00000255381_p.D1802G	Alt	10.5921	7.71742	-9.54957	10.5927	1.51525e-43	+	Pathogenic Escherichia coli infection;Tight junction;Viral myocarditis		205;200;200;200;200;197;197;195	11;11;11;11;11;11;11;11	11;11;11;11;11;11;11;11
5671	ENSP00000256637;Q99523;ENSP00000438597;Q99523-2;ENSP00000488262;A0A0J9YX61;ENSP00000487712;A0A0J9YVX1;ENSP00000487674;A0A0J9YVU2	ENSP00000256637;Q99523;ENSP00000438597;Q99523-2	Sortilin	SORT1		Unspecific	8.1707	9.23798	3.54545	9.27367	0.000284355	+	Cholesterol metabolism;Lysosome;Neurotrophin signaling pathway	Golgi Associated Vesicle Biogenesis;Membrane Trafficking;trans-Golgi Network Vesicle Budding;Vesicle-mediated transport	28;28;24;24;4;4;3;3;3;3	28;28;24;24;4;4;3;3;3;3	18;18;15;15;2;2;1;1;3;3
5700	ENSP00000257215_p.P889L;ENSP00000257215;Q9Y4D2;Q6WQJ1;S4R2M3;F5GY58;ENSP00000440264	ENSP00000257215_p.P889L;ENSP00000257215;Q9Y4D2;Q6WQJ1	Sn1-specific diacylglycerol lipase alpha	DAGLA;Dagla	ENSP00000257215_p.P889L;ENSP00000257215_p.P889L;;;;;	Unspecific	8.06303	6.22769	-6.09686	8.06933	0.000639295	+	Aldosterone synthesis and secretion;Retrograde endocannabinoid signaling	Arachidonate production from DAG;Effects of PIP2 hydrolysis;G alpha (q) signalling events;GPCR downstream signalling;Hemostasis;Platelet activation, signaling and aggregation;Signal Transduction;Signaling by GPCR	20;20;20;16;1;1;1	20;20;20;16;1;1;1	20;20;20;16;1;1;1
5745	ENSP00000258052_p.R265S;ENSP00000399731_p.R161S	ENSP00000258052_p.R265S			ENSP00000258052_p.R265S;ENSP00000399731_p.R161S	Alt	7.24898	8.72158	4.89187	8.73597	0.000253911	+			19;8	19;8	1;1
5788	ENSP00000258526_p.I735N;ENSP00000258526;O60486;ENSP00000258526_p.R614S;ENSP00000446720;B4DHQ7;F5H3A2;ENSP00000439225;F8W1K6;ENSP00000446781;F8W095;ENSP00000447625;F8VUW4;ENSP00000447843	ENSP00000258526_p.I735N;ENSP00000258526;O60486;ENSP00000258526_p.R614S;ENSP00000446720;B4DHQ7	Plexin-C1	PLXNC1	ENSP00000258526_p.I735N;ENSP00000258526_p.R614S;ENSP00000258526_p.I735N;;ENSP00000258526_p.R614S;;;;;;;;;;	Unspecific	7.86577	8.92761	3.52738	8.96373	0.000860316	+	Axon guidance	Axon guidance;Developmental Biology;Other semaphorin interactions;Semaphorin interactions	54;54;54;53;31;31;17;17;17;17;6;6;3;3	52;52;52;51;29;29;15;15;17;17;6;6;3;3	20;20;20;19;5;5;3;3;3;3;0;0;1;1
5809	ENSP00000385316;ENSP00000258796;Q9C0H2-2;Q9C0H2;ENSP00000385015;Q9C0H2-3;Q9C0H2-4;H7C3T6;ENSP00000413757	ENSP00000385316;ENSP00000258796;Q9C0H2-2;Q9C0H2;ENSP00000385015;Q9C0H2-3;Q9C0H2-4	Protein tweety homolog 3	TTYH3		Unspecific	6.7492	8.41864	5.54578	8.42784	7.07539e-05	+		Ion channel transport;Stimuli-sensing channels;Transport of small molecules	9;9;9;9;8;8;7;2;2	9;9;9;9;8;8;7;2;2	6;6;6;6;5;5;5;1;1
5863	ENSP00000259667;Q9BX68	ENSP00000259667;Q9BX68	Histidine triad nucleotide-binding protein 2, mitochondrial	HINT2		Unspecific	8.75128	9.75034	3.31881	9.79182	0.000621361	+			11;11	11;11	9;9
5885	ENSP00000411771;ENSP00000260130;O00560;ENSP00000430730;B4DHN5;ENSP00000397820;E9PBU7	ENSP00000411771;ENSP00000260130;O00560;ENSP00000430730;B4DHN5;ENSP00000397820;E9PBU7	Syntenin-1	SDCBP		Unspecific	7.74022	9.07286	4.42694	9.09259	3.50144e-05	+		Axon guidance;Developmental Biology;EPH-Ephrin signaling;Ephrin signaling;Immune System;Innate Immune System;L1CAM interactions;Neurofascin interactions;Neutrophil degranulation	23;23;23;14;14;14;14	2;2;2;0;0;0;0	0;0;0;0;0;0;0
5948	ENSP00000498483;ENSP00000273342;ENSP00000261037;P27658;ENSP00000482679;A0A087WZI0;ENSP00000387589;C9JTN9	ENSP00000498483;ENSP00000273342;ENSP00000261037;P27658	Collagen alpha-1(VIII) chain;Vastatin	COL8A1		Unspecific	8.51964	7.01887	-4.98545	8.53314	1.51114e-05	+	African trypanosomiasis;Allograft rejection;alpha-Linolenic acid metabolism;Aminoacyl-tRNA biosynthesis;Amoebiasis;Antigen processing and presentation;Arachidonic acid metabolism;Arginine and proline metabolism;Asthma;Autoimmune thyroid disease;B cell receptor signaling pathway;beta-Alanine metabolism;Calcium signaling pathway;Cell adhesion molecules (CAMs);Chemical carcinogenesis;Cholesterol met…	Assembly of collagen fibrils and other multimeric structures;Collagen biosynthesis and modifying enzymes;Collagen chain trimerization;Collagen degradation;Collagen formation;Degradation of the extracellular matrix;Extracellular matrix organization;Integrin cell surface interactions	12;12;12;12;3;3;2;2	12;12;12;12;3;3;2;2	7;7;7;7;2;2;1;1
5950	ENSP00000417923;ENSP00000417805;ENSP00000261070;Q14061;ENSP00000417120;H7C4E5;ENSP00000417651_p.V41G;ENSP00000417651;C9J8T6	ENSP00000417923;ENSP00000417805;ENSP00000261070;Q14061;ENSP00000417120;H7C4E5;ENSP00000417651_p.V41G;ENSP00000417651;C9J8T6	Cytochrome c oxidase copper chaperone	COX17	;;;;;;ENSP00000417651_p.V41G;ENSP00000417651_p.V41G;	Unspecific	8.86323	7.46693	-4.63841	8.88032	2.3986e-06	+	Metabolic pathways;Oxidative phosphorylation;Thermogenesis	Mitochondrial protein import;Protein localization	8;8;8;8;6;6;6;6;6	8;8;8;8;6;6;6;6;6	2;2;2;2;0;0;2;2;2
5960	ENSP00000440817;ENSP00000261192;P54687-4;P54687;ENSP00000443459;P54687-5;ENSP00000440827;P54687-3;ENSP00000339805;P54687-2;ENSP00000481749;A0A087WYF2;F5H2F2;ENSP00000438593;F6YUH3	ENSP00000440817;ENSP00000261192;P54687-4;P54687;ENSP00000443459;P54687-5;ENSP00000440827;P54687-3;ENSP00000339805;P54687-2	Branched-chain-amino-acid aminotransferase, cytosolic	BCAT1		Unspecific	8.66889	6.17937	-8.27002	8.67029	2.19311e-11	+	2-Oxocarboxylic acid metabolism;Biosynthesis of amino acids;Cysteine and methionine metabolism;Metabolic pathways;Pantothenate and CoA biosynthesis;Valine, leucine and isoleucine biosynthesis;Valine, leucine and isoleucine degradation	Branched-chain amino acid catabolism;Metabolism;Metabolism of amino acids and derivatives	17;17;17;17;16;16;13;13;11;11;7;7;6;6;1	17;17;17;17;16;16;13;13;11;11;7;7;6;6;1	14;14;14;14;13;13;10;10;8;8;6;6;6;6;0
5982	ENSP00000261326_p.H225R;ENSP00000261326_p.V358M;ENSP00000261326_p.T170I;ENSP00000261326_p.H703N;ENSP00000261326;Q96EN8;ENSP00000261326_p.D793E	ENSP00000261326_p.H225R;ENSP00000261326_p.V358M;ENSP00000261326_p.T170I;ENSP00000261326_p.H703N;ENSP00000261326;Q96EN8;ENSP00000261326_p.D793E	Molybdenum cofactor sulfurase	MOCOS	ENSP00000261326_p.H225R;ENSP00000261326_p.V358M;ENSP00000261326_p.T170I;ENSP00000261326_p.H703N;ENSP00000261326_p.D793E;ENSP00000261326_p.H225R;ENSP00000261326_p.S184G;ENSP00000261326_p.T170I;ENSP00000261326_p.V358M;ENSP00000261326_p.H703N;;ENSP00000261326_p.D793E	Alt	7.30838	9.17595	6.20395	9.18181	1.42366e-10	+	Folate biosynthesis	Metabolism;Metabolism of vitamins and cofactors;Metabolism of water-soluble vitamins and cofactors;Molybdenum cofactor biosynthesis	41;40;40;40;40;40;39	41;40;40;40;40;40;39	1;0;0;0;0;0;0
6213	ENSP00000424571_p.L1523F;ENSP00000424571_p.G531A;ENSP00000424571_p.G1598W;ENSP00000424571;ENSP00000262464_p.L1523F;ENSP00000262464_p.G531A;ENSP00000262464_p.G1598W;ENSP00000262464;P35556;ENSP00000424571_p.V965I;ENSP00000262464_p.V965I;ENSP00000424571_p.A68V;ENSP00000262464_p.A68V	ENSP00000424571_p.L1523F;ENSP00000424571_p.G531A;ENSP00000424571_p.G1598W;ENSP00000424571;ENSP00000262464_p.L1523F;ENSP00000262464_p.G531A;ENSP00000262464_p.G1598W;ENSP00000262464;P35556;ENSP00000424571_p.V965I;ENSP00000262464_p.V965I;ENSP00000424571_p.A68V;ENSP00000262464_p.A68V	Fibrillin-2	FBN2	ENSP00000424571_p.L1523F;ENSP00000424571_p.G531A;ENSP00000424571_p.G1598W;ENSP00000424571_p.A68V;ENSP00000424571_p.S2580L;ENSP00000424571_p.V965I;ENSP00000424571_p.G1598W;ENSP00000424571_p.G531A;ENSP00000424571_p.L1523F;ENSP00000262464_p.L1523F;ENSP00000262464_p.G531A;ENSP00000262464_p.G1598W;ENSP00000262464_p.A68V;ENSP00000262464_p.S2580L;ENSP00000262464_p.V965I;ENSP00000262464_p.G1598W;ENSP0000…	Alt+Ref	8.90604	6.41061	-8.28965	8.90743	1.69662e-17	+		Degradation of the extracellular matrix;Elastic fibre formation;Extracellular matrix organization;Molecules associated with elastic fibres	70;70;70;70;70;70;70;70;70;69;69;69;69	63;63;63;63;63;63;63;63;63;62;62;62;62	0;0;0;0;0;0;0;0;0;0;0;0;0
6218	ENSP00000262494;P09471-2;ENSP00000491391;A0A1W2PP87;F7BLT7;ENSP00000492694;A0A1W2PRJ7;ENSP00000492677_p.R118X;ENSP00000492677;A0A1W2PS82;ENSP00000492271;A0A1W2PRE1;ENSP00000491999;A0A1W2PQK2;ENSP00000477740;A0A087WTB6;ENSP00000345971;A2A2R6;A2AE31;ENSP00000482596_p.L107I;ENSP00000482596;A0A087WZE5;Q8C040	ENSP00000262494;P09471-2	Guanine nucleotide-binding protein G(o) subunit alpha	GNAO1	;;;;;;;ENSP00000492677_p.R118X;ENSP00000492677_p.R118X;;;;;;;;;;;ENSP00000482596_p.L107I;ENSP00000482596_p.L107I;;	Unspecific	7.22683	9.10416	6.23636	9.10989	2.94286e-09	+	Adrenergic signaling in cardiomyocytes;Alcoholism;Aldosterone synthesis and secretion;Amoebiasis;Amphetamine addiction;Bile secretion;Calcium signaling pathway;cAMP signaling pathway;Chagas disease (American trypanosomiasis);Cholinergic synapse;Circadian entrainment;Cocaine addiction;Cortisol synthesis and secretion;Cushing syndrome;Dilated cardiomyopathy (DCM);Dopaminergic synapse;Endocrine and …	Aquaporin-mediated transport;Beta-catenin independent WNT signaling;Ca2+ pathway;Chaperonin-mediated protein folding;Class B/2 (Secretin family receptors);Cooperation of PDCL (PhLP1) and TRiC/CCT in G-protein beta folding;G alpha (i) signalling events;G alpha (s) signalling events;G alpha (z) signalling events;Glucagon signaling in metabolic regulation;Glucagon-like Peptide-1 (GLP1) regulates ins…	19;19;7;7;6;6;6;6;6;6;2;2;2;2;2;2;1;1;1;1;1;1;1	14;14;7;7;6;5;5;5;5;5;1;1;1;1;1;1;0;0;0;0;0;0;0	0;0;0;0;0;0;0;0;0;0;0;0;0;0;0;0;0;0;0;0;0;0;0
6305	ENSP00000409976;ENSP00000263080;P45381;I3L0T3;ENSP00000458324;I3L4M0;ENSP00000461358	ENSP00000409976;ENSP00000263080;P45381	Aspartoacylase	ASPA		Unspecific	7.60552	8.85007	4.1343	8.87412	0.000111612	+	Alanine, aspartate and glutamate metabolism;Histidine metabolism;Metabolic pathways	Aspartate and asparagine metabolism;Metabolism;Metabolism of amino acids and derivatives	21;21;21;5;5;3;3	21;21;21;5;5;3;3	17;17;17;4;4;3;3
6345	ENSP00000263277;Q9NZN4;ENSP00000439036;Q9NZN4-2;D3Z7U7	ENSP00000263277;Q9NZN4;ENSP00000439036;Q9NZN4-2	EH domain-containing protein 2	EHD2		Unspecific	9.04603	8.10243	-3.13457	9.09286	5.6421e-05	+	Endocytosis	Factors involved in megakaryocyte development and platelet production;Hemostasis	46;46;33;33;5	10;10;3;3;0	9;9;3;3;0
6384	ENSP00000263620_p.P421H;ENSP00000263620_p.G556S;ENSP00000263620;Q99856;ENSP00000440911;H0YFY1	ENSP00000263620_p.P421H;ENSP00000263620_p.G556S;ENSP00000263620;Q99856	AT-rich interactive domain-containing protein 3A	ARID3A	ENSP00000263620_p.P421H;ENSP00000263620_p.G556S;ENSP00000263620_p.G556S;ENSP00000263620_p.P421H;;;	Unspecific	8.77187	6.073	-8.96544	8.77274	4.49325e-13	+		Gene expression (Transcription);Generic Transcription Pathway;RNA Polymerase II Transcription;TP53 Regulates Transcription of Cell Cycle Genes;TP53 Regulates Transcription of Genes Involved in G1 Cell Cycle Arrest;Transcriptional Regulation by TP53	26;26;26;26;4;4	26;26;26;26;4;4	10;10;10;10;0;0
6428	ENSP00000386965_p.H335R;ENSP00000386315_p.H335R;ENSP00000263867_p.H335R;ENSP00000387063_p.H320R;ENSP00000397381_p.H90R	ENSP00000386965_p.H335R;ENSP00000386315_p.H335R;ENSP00000263867_p.H335R;ENSP00000387063_p.H320R			ENSP00000386965_p.H335R;ENSP00000386315_p.H335R;ENSP00000263867_p.H335R;ENSP00000387063_p.H320R;ENSP00000397381_p.H90R	Alt+Ref	9.73451	8.04323	-5.61832	9.74326	1.75112e-13	+			19;19;19;17;5	13;13;13;11;5	2;2;2;2;2
6461	ENSP00000264071;Q9D6F9;P04350;M0R2D3;ENSP00000472481;M0QY85;ENSP00000469660;M0R278;ENSP00000472375;M0QZL7;ENSP00000470627;M0R1I1;ENSP00000471880	ENSP00000264071;Q9D6F9;P04350	Tubulin beta-4A chain	Tubb4a;TUBB4A		Unspecific	8.7169	9.75028	3.43283	9.78874	0.000382394	+	Gap junction;Pathogenic Escherichia coli infection;Phagosome	Activation of AMPK downstream of NMDARs;Activation of NMDA receptors and postsynaptic events;Adaptive Immune System;Anchoring of the basal body to the plasma membrane;Asparagine N-linked glycosylation;Assembly and cell surface presentation of NMDA receptors;AURKA Activation by TPX2;Axon guidance;Carboxyterminal post-translational modifications of tubulin;Cell Cycle;Cell Cycle, Mitotic;Cellular re…	39;39;39;10;10;8;8;8;8;6;6;4;4	8;8;8;0;0;1;1;3;3;1;1;2;2	3;3;3;0;0;0;0;0;0;0;0;0;0
6466	ENSP00000264094;P58215;ENSP00000386696;E7END4;ENSP00000387103;B8ZZT6;P58215-2;ENSP00000398260;C9J5M1;ENSP00000404026;H7C248	ENSP00000264094;P58215;ENSP00000386696;E7END4;ENSP00000387103;B8ZZT6	Lysyl oxidase homolog 3	LOXL3		Unspecific	9.26157	8.20051	-3.52477	9.29775	8.80416e-06	+		Assembly of collagen fibrils and other multimeric structures;Collagen formation;Crosslinking of collagen fibrils;Elastic fibre formation;Extracellular matrix organization	31;31;30;30;22;22;14;11;11;10;10	31;31;30;30;22;22;14;11;11;10;10	5;5;5;5;5;5;0;5;5;0;0
6492	ENSP00000264228;Q9H8P0	ENSP00000264228;Q9H8P0	Polyprenol reductase	SRD5A3		Unspecific	6.48062	8.01903	5.11047	8.03142	0.00112748	+	N-Glycan biosynthesis;Steroid hormone biosynthesis	Androgen biosynthesis;Asparagine N-linked glycosylation;Biosynthesis of the N-glycan precursor (dolichol lipid-linked oligosaccharide, LLO) and transfer to a nascent protein;Defective SRD5A3 causes SRD5A3-CDG (CDG-1q) and KHRZ;Disease;Diseases associated with glycosylation precursor biosynthesis;Diseases of glycosylation;Metabolism;Metabolism of lipids;Metabolism of proteins;Metabolism of steroid…	7;7	7;7	6;6
6540	LRG_83p1;ENSP00000264605;Q9BV36;ENSP00000386338;Q9BV36-5;Q9BV36-4;H7C3K9;ENSP00000412438;ENSP00000393010;H7C052;ENSP00000409170;C9JKV5;ENSP00000403909;C9JI01;D3Z049	LRG_83p1;ENSP00000264605;Q9BV36;ENSP00000386338;Q9BV36-5;Q9BV36-4;H7C3K9;ENSP00000412438	Melanophilin	MLPH		Unspecific	7.16182	9.04253	6.24759	9.04821	2.74946e-09	+			40;40;40;33;33;27;22;22;16;16;7;7;3;3;1	40;40;40;33;33;27;22;22;16;16;7;7;3;3;1	0;0;0;0;0;0;0;0;0;0;0;0;0;0;0
6588	ENSP00000264908;P12429;ENSP00000423068;ENSP00000421015;D6RA82;ENSP00000421512;D6RFG5;ENSP00000426591;D6RFJ9;ENSP00000422281;D6RCA8;ENSP00000424584;D6RAZ8	ENSP00000264908;P12429;ENSP00000423068;ENSP00000421015;D6RA82	Annexin A3;Annexin	ANXA3		Unspecific	7.52922	9.58887	6.84202	9.59264	3.02235e-11	+			30;30;27;27;27;12;12;8;8;7;7;6;6	18;18;15;15;15;9;9;4;4;7;7;6;6	18;18;15;15;15;9;9;4;4;7;7;6;6
6617	ENSP00000427100;ENSP00000426850;ENSP00000422806;ENSP00000422078;ENSP00000265073;P53999;ENSP00000423893;D6RC37;ENSP00000423356;D6R970	ENSP00000427100;ENSP00000426850;ENSP00000422806;ENSP00000422078;ENSP00000265073;P53999	Activated RNA polymerase II transcriptional coactivator p15	SUB1		Unspecific	9.48295	8.86903	-2.03936	9.57751	0.00058446	+			14;14;14;14;14;14;4;4;4;4	14;14;14;14;14;14;4;4;4;4	10;10;10;10;10;10;4;4;4;4
6630	ENSP00000265131_p.Q680R;F5H5D6;ENSP00000443469	ENSP00000265131_p.Q680R			ENSP00000265131_p.Q680R;;	Alt+Ref	10.6897	10.0316	-2.18589	10.7759	0.00065426	+	ECM-receptor interaction;Focal adhesion;Human papillomavirus infection;MicroRNAs in cancer;PI3K-Akt signaling pathway	ECM proteoglycans;Extracellular matrix organization;Integrin cell surface interactions;Metabolism of proteins;Non-integrin membrane-ECM interactions;Post-translational protein modification;Post-translational protein phosphorylation;Regulation of Insulin-like Growth Factor (IGF) transport and uptake by Insulin-like Growth Factor Binding Proteins (IGFBPs);Syndecan interactions	117;1;1	117;1;1	0;0;0
6714	ENSP00000370981_p.N35H;ENSP00000370981;ENSP00000265801_p.N35H;ENSP00000265801;Q9Y250;Q9Y250-2;Q9Y250-3;ENSP00000429263_p.N35H;ENSP00000429263;Q9Y250-4;Q9Y250-5;Q9Y250-6;ENSP00000479534_p.N35H;ENSP00000479534;Q9Y250-7	ENSP00000370981_p.N35H;ENSP00000370981;ENSP00000265801_p.N35H;ENSP00000265801;Q9Y250;Q9Y250-2;Q9Y250-3;ENSP00000429263_p.N35H;ENSP00000429263;Q9Y250-4;Q9Y250-5	Leucine zipper putative tumor suppressor 1	LZTS1	ENSP00000370981_p.N35H;ENSP00000370981_p.N35H;ENSP00000265801_p.N35H;ENSP00000265801_p.N35H;;;;ENSP00000429263_p.N35H;ENSP00000429263_p.N35H;;;;ENSP00000479534_p.N35H;ENSP00000479534_p.N35H;	Unspecific	6.88144	9.05824	7.23117	9.06112	4.43686e-12	+			41;41;41;41;41;39;38;36;36;36;31;9;2;2;2	41;41;41;41;41;39;38;36;36;36;31;9;2;2;2	27;27;27;27;27;26;24;23;23;23;22;6;1;1;1
6781	ENSP00000266718;P51884	ENSP00000266718;P51884	Lumican	LUM		Unspecific	8.39446	7.34256	-3.49432	8.43138	0.00119604	+	Proteoglycans in cancer	Defective B4GALT1 causes B4GALT1-CDG (CDG-2d);Defective CHST6 causes MCDC1;Defective ST3GAL3 causes MCT12 and EIEE15;Disease;Diseases associated with glycosaminoglycan metabolism;Diseases of glycosylation;ECM proteoglycans;Extracellular matrix organization;Glycosaminoglycan metabolism;Integrin cell surface interactions;Keratan sulfate biosynthesis;Keratan sulfate degradation;Keratan sulfate/kerat…	16;16	11;11	10;10
6848	ENSP00000456281_p.L76M;ENSP00000268150_p.L76M;ENSP00000444332_p.R3S;ENSP00000444332_p.L32M;ENSP00000444332;Q08431-4;ENSP00000268151_p.L76M;Q08431-2;ENSP00000452926_p.L76M;ENSP00000478952;A0A087WUV5	ENSP00000456281_p.L76M;ENSP00000268150_p.L76M;ENSP00000444332_p.R3S;ENSP00000444332_p.L32M;ENSP00000444332;Q08431-4;ENSP00000268151_p.L76M;Q08431-2;ENSP00000452926_p.L76M	Lactadherin;Lactadherin short form;Medin	MFGE8	ENSP00000456281_p.L76M;ENSP00000268150_p.L76M;ENSP00000444332_p.R3S;ENSP00000444332_p.L32M;ENSP00000444332_p.L32M;ENSP00000444332_p.R3S;;ENSP00000268151_p.L76M;;ENSP00000452926_p.L76M;;	Alt+Ref	8.27382	9.61977	4.47114	9.63892	2.19841e-06	+		Amyloid fiber formation;Metabolism of proteins;Post-translational protein modification;Post-translational protein phosphorylation;Regulation of Insulin-like Growth Factor (IGF) transport and uptake by Insulin-like Growth Factor Binding Proteins (IGFBPs)	24;24;21;21;21;21;19;18;13;3;3	24;24;21;21;21;21;19;18;13;3;3	1;1;0;0;0;0;1;0;1;0;0
6899	ENSP00000269228_p.H215R;ENSP00000269228_p.M642I;ENSP00000269228_p.I858V;ENSP00000269228_p.D874V;ENSP00000269228;O15118;ENSP00000467636_p.M334I;ENSP00000467636_p.I550V;ENSP00000467636_p.D566V;ENSP00000467636;K7EQ23;O15118-2;ENSP00000468321;K7ERM4;ENSP00000468438;K7ERW2	ENSP00000269228_p.H215R;ENSP00000269228_p.M642I;ENSP00000269228_p.I858V;ENSP00000269228_p.D874V;ENSP00000269228;O15118;ENSP00000467636_p.M334I;ENSP00000467636_p.I550V;ENSP00000467636_p.D566V;ENSP00000467636;K7EQ23;O15118-2	Niemann-Pick C1 protein	NPC1	ENSP00000269228_p.H215R;ENSP00000269228_p.M642I;ENSP00000269228_p.I858V;ENSP00000269228_p.D874V;ENSP00000269228_p.H215R;ENSP00000269228_p.I858V;ENSP00000269228_p.M642I;ENSP00000269228_p.D874V;;ENSP00000467636_p.M334I;ENSP00000467636_p.I550V;ENSP00000467636_p.D566V;ENSP00000467636_p.I550V;ENSP00000467636_p.M334I;ENSP00000467636_p.D566V;;;;;;	Alt	8.12848	9.11245	3.26867	9.15532	0.00118363	+	Cholesterol metabolism;Lysosome	LDL clearance;Plasma lipoprotein assembly, remodeling, and clearance;Plasma lipoprotein clearance;Transport of small molecules	26;25;25;25;25;25;16;16;16;16;16;16;3;3;3;3	26;25;25;25;25;25;16;16;16;16;16;16;3;3;3;3	23;22;22;22;22;22;13;13;13;13;13;13;2;2;2;2
6974	ENSP00000271588_p.I2418T;ENSP00000271588_p.R4623Q;ENSP00000271588_p.I2214L;ENSP00000271588;Q96RW7;ENSP00000271588_p.M5229I;Q96RW7-2;Q96RW7-3;Q5TCP6;ENSP00000406205;ENSP00000406205_p.M21I	ENSP00000271588_p.I2418T;ENSP00000271588_p.R4623Q;ENSP00000271588_p.I2214L;ENSP00000271588;Q96RW7;ENSP00000271588_p.M5229I;Q96RW7-2	Hemicentin-1	HMCN1	ENSP00000271588_p.I2418T;ENSP00000271588_p.R4623Q;ENSP00000271588_p.I2214L;ENSP00000271588_p.E2893G;ENSP00000271588_p.I2418T;ENSP00000271588_p.M5229I;ENSP00000271588_p.Q4437R;ENSP00000271588_p.I2214L;ENSP00000271588_p.R4623Q;;ENSP00000271588_p.M5229I;;;;ENSP00000406205_p.M21I;ENSP00000406205_p.M21I	Alt+Ref	8.50442	10.2585	5.82678	10.266	2.67677e-18	+			225;224;224;224;224;223;219;20;9;9;8	225;224;224;224;224;223;219;20;9;9;8	1;0;0;0;0;0;0;0;0;0;0
6992	ENSP00000485061_p.K551N;ENSP00000485061;X6R3N0;ENSP00000271857_p.K679N;ENSP00000271857;Q5K4L6;ENSP00000485061_p.F517L;ENSP00000271857_p.F645L;ENSP00000485061_p.L201M;ENSP00000485061_p.E632D;ENSP00000271857_p.L329M;ENSP00000271857_p.E760D;Q5K4L6-3;H0YDP0;ENSP00000434025_p.K59N;ENSP00000434025;ENSP00000434025_p.F25L;ENSP00000434025_p.E140D	ENSP00000485061_p.K551N;ENSP00000485061;X6R3N0;ENSP00000271857_p.K679N;ENSP00000271857;Q5K4L6;ENSP00000485061_p.F517L;ENSP00000271857_p.F645L;ENSP00000485061_p.L201M;ENSP00000485061_p.E632D;ENSP00000271857_p.L329M;ENSP00000271857_p.E760D	Long-chain fatty acid transport protein 3	SLC27A3	ENSP00000485061_p.K551N;ENSP00000485061_p.E632D;ENSP00000485061_p.F517L;ENSP00000485061_p.L201M;ENSP00000485061_p.K551N;;ENSP00000271857_p.K679N;ENSP00000271857_p.E760D;ENSP00000271857_p.F645L;ENSP00000271857_p.L329M;ENSP00000271857_p.K679N;;ENSP00000485061_p.F517L;ENSP00000271857_p.F645L;ENSP00000485061_p.L201M;ENSP00000485061_p.E632D;ENSP00000271857_p.L329M;ENSP00000271857_p.E760D;;;ENSP0000043…	Ref	8.52346	10.1475	5.39486	10.1577	2.21388e-09	+	Insulin resistance	Fatty acid metabolism;Fatty acyl-CoA biosynthesis;Metabolism;Metabolism of lipids;Synthesis of very long-chain fatty acyl-CoAs	37;37;37;37;37;37;36;36;35;35;35;35;16;7;7;7;6;5	37;37;37;37;37;37;36;36;35;35;35;35;16;7;7;7;6;5	1;1;1;1;1;1;1;1;1;1;1;1;0;0;0;0;0;0
6999	ENSP00000411152_p.P552Q;ENSP00000272117_p.P552Q;ENSP00000411152_p.S408A;ENSP00000411152;ENSP00000272117_p.S408A;ENSP00000272117;P27987;ENSP00000411152_p.A172G;ENSP00000272117_p.A172G;ENSP00000411152_p.R173H;ENSP00000272117_p.R173H;ENSP00000355748_p.P552Q;ENSP00000355748_p.S408A;ENSP00000355748;P27987-2;ENSP00000355748_p.A172G;ENSP00000355748_p.R173H	ENSP00000411152_p.P552Q;ENSP00000272117_p.P552Q;ENSP00000411152_p.S408A;ENSP00000411152;ENSP00000272117_p.S408A;ENSP00000272117;P27987;ENSP00000411152_p.A172G;ENSP00000272117_p.A172G;ENSP00000411152_p.R173H;ENSP00000272117_p.R173H;ENSP00000355748_p.P552Q;ENSP00000355748_p.S408A;ENSP00000355748;P27987-2;ENSP00000355748_p.A172G;ENSP00000355748_p.R173H	Inositol-trisphosphate 3-kinase B	ITPKB	ENSP00000411152_p.P552Q;ENSP00000272117_p.P552Q;ENSP00000411152_p.S408A;ENSP00000411152_p.(S90_S96)del;ENSP00000411152_p.A172G;ENSP00000411152_p.P552Q;ENSP00000411152_p.R173H;ENSP00000411152_p.S408A;ENSP00000272117_p.S408A;ENSP00000272117_p.(S90_S96)del;ENSP00000272117_p.A172G;ENSP00000272117_p.P552Q;ENSP00000272117_p.R173H;ENSP00000272117_p.S408A;;ENSP00000411152_p.A172G;ENSP00000272117_p.A172G;…	Alt+Ref	7.29046	9.25062	6.51153	9.25536	1.52425e-11	+	Calcium signaling pathway;Inositol phosphate metabolism;Metabolic pathways;Phosphatidylinositol signaling system	Inositol phosphate metabolism;Metabolism;Synthesis of IP3 and IP4 in the cytosol	57;57;54;54;54;54;54;53;53;52;52;43;40;40;40;39;38	57;57;54;54;54;54;54;53;53;52;52;43;40;40;40;39;38	4;4;1;1;1;1;1;1;1;1;1;4;1;1;1;1;1
7003	ENSP00000480004;ENSP00000355802;ENSP00000272167;P07099;ENSP00000480004_p.Y113H;ENSP00000355802_p.Y113H;ENSP00000272167_p.Y113H;ENSP00000398491;B1AQP9;ENSP00000408469;B1AQP8;ENSP00000398491_p.Y113H;ENSP00000408469_p.Y113H	ENSP00000480004;ENSP00000355802;ENSP00000272167;P07099;ENSP00000480004_p.Y113H;ENSP00000355802_p.Y113H;ENSP00000272167_p.Y113H	Epoxide hydrolase 1	EPHX1	ENSP00000480004_p.H139R;ENSP00000480004_p.Y113H;ENSP00000355802_p.H139R;ENSP00000355802_p.Y113H;ENSP00000272167_p.H139R;ENSP00000272167_p.Y113H;;ENSP00000480004_p.Y113H;ENSP00000355802_p.Y113H;ENSP00000272167_p.Y113H;ENSP00000398491_p.H139R;ENSP00000398491_p.Y113H;;ENSP00000408469_p.Y113H;;ENSP00000398491_p.Y113H;ENSP00000408469_p.Y113H	Ref	9.07795	10.1566	3.58305	10.1914	1.66959e-07	+	Bile secretion;Chemical carcinogenesis;Metabolism of xenobiotics by cytochrome P450	Biological oxidations;Metabolism;Phase I - Functionalization of compounds	42;42;42;42;40;40;40;18;18;16;16;16;14	41;41;41;41;39;39;39;18;18;16;16;16;14	1;1;1;1;1;1;1;1;1;0;0;1;0
7111	ENSP00000274721;O60609;ENSP00000274721_p.A240T;ENSP00000367613;O60609-2;ENSP00000367613_p.A209T;O35118	ENSP00000274721;O60609;ENSP00000274721_p.A240T;ENSP00000367613;O60609-2;ENSP00000367613_p.A209T	GDNF family receptor alpha-3	GFRA3	ENSP00000274721_p.A240T;;ENSP00000274721_p.A240T;ENSP00000367613_p.A209T;;ENSP00000367613_p.A209T;	Ref	8.37111	6.43238	-6.44032	8.37608	2.43866e-06	+		Axon guidance;Cytokine Signaling in Immune system;Developmental Biology;FLT3 Signaling;Immune System;MAPK family signaling cascades;MAPK1/MAPK3 signaling;RAF/MAP kinase cascade;RET signaling;Signal Transduction	12;12;11;10;10;9;1	12;12;11;10;10;9;1	12;12;11;10;10;9;1
7117	ENSP00000274963_p.R457L;ENSP00000274963_p.Q32H;ENSP00000274963;Q7Z6J4;Q7Z6J4-4;H7BY95;ENSP00000362635_p.Q32H;ENSP00000362635;F8WEZ2;ENSP00000419657_p.Q32H;ENSP00000419657;Q7Z6J4-5;Q7Z6J4-2	ENSP00000274963_p.R457L;ENSP00000274963_p.Q32H;ENSP00000274963;Q7Z6J4	FYVE, RhoGEF and PH domain-containing protein 2	FGD2	ENSP00000274963_p.R457L;ENSP00000274963_p.Q32H;ENSP00000274963_p.Q32H;ENSP00000274963_p.R457L;;;;ENSP00000362635_p.Q32H;ENSP00000362635_p.Q32H;;ENSP00000419657_p.Q32H;ENSP00000419657_p.Q32H;;	Unspecific	8.30326	6.4986	-5.99495	8.31002	1.084e-05	+		Cell death signalling via NRAGE, NRIF and NADE;Death Receptor Signalling;G alpha (12/13) signalling events;GPCR downstream signalling;NRAGE signals death through JNK;p75 NTR receptor-mediated signalling;Rho GTPase cycle;Signal Transduction;Signaling by GPCR;Signaling by Rho GTPases	25;25;25;25;4;3;3;3;3;3;3;2;2	25;25;25;25;4;3;3;3;3;3;3;2;2	20;20;20;20;3;3;3;3;3;3;3;2;1
7243	ENSP00000386940_p.T105I;ENSP00000386940;ENSP00000280097_p.T105I;ENSP00000280097;P50135;ENSP00000333259;P50135-2;ENSP00000419415;ENSP00000280096;P50135-3	ENSP00000386940_p.T105I;ENSP00000386940;ENSP00000280097_p.T105I;ENSP00000280097;P50135	Histamine N-methyltransferase	HNMT	ENSP00000386940_p.T105I;ENSP00000386940_p.T105I;ENSP00000280097_p.T105I;ENSP00000280097_p.T105I;;;;;;	Unspecific	7.39025	8.75059	4.51895	8.76913	0.000764432	+	Histidine metabolism;Metabolic pathways	Histidine catabolism;Metabolism;Metabolism of amino acids and derivatives;Metabolism of ingested SeMet, Sec, MeSec into H2Se;Selenoamino acid metabolism	12;12;12;12;12;5;5;4;4;4	12;12;12;12;12;5;5;4;4;4	11;11;11;11;11;4;4;3;3;3
7249	LRG_361p1;ENSP00000280326;P48643;ENSP00000427297;B7ZAR1;ENSP00000423318;E9PCA1;ENSP00000487128;ENSP00000425751;D6RIZ7;H0Y914	LRG_361p1;ENSP00000280326;P48643;ENSP00000427297;B7ZAR1;ENSP00000423318;E9PCA1	T-complex protein 1 subunit epsilon	CCT5	LRG_361p1_p.S401F;ENSP00000280326_p.S401F;;ENSP00000427297_p.S363F;;ENSP00000423318_p.S380F;;;;;	Alt+Ref	10.4815	11.2537	2.56507	11.3215	0.000263593	+		Association of TriC/CCT with target proteins during biosynthesis;BBSome-mediated cargo-targeting to cilium;Cargo trafficking to the periciliary membrane;Chaperonin-mediated protein folding;Cilium Assembly;Cooperation of PDCL (PhLP1) and TRiC/CCT in G-protein beta folding;Cooperation of Prefoldin and TriC/CCT in actin and tubulin folding;Folding of actin by CCT/TriC;Formation of tubulin folding in…	71;71;71;64;64;64;64;5;5;5;5	71;71;71;64;64;64;64;5;5;5;5	0;0;0;0;0;0;0;0;0;0;0
7327	ENSP00000422634;ENSP00000282356;Q16566;Q8BGR3;P08414;ENSP00000426940;D6RE65;ENSP00000421606;D6REY7;ENSP00000424912;ENSP00000423761;D6RCD6;A0A3Q4EG96	ENSP00000422634;ENSP00000282356;Q16566;Q8BGR3;P08414	Calcium/calmodulin-dependent protein kinase type IV	CAMK4;Camk4		Unspecific	8.56578	7.20707	-4.51355	8.58439	8.07567e-05	+	Alcoholism;Aldosterone synthesis and secretion;Amphetamine addiction;Apelin signaling pathway;Calcium signaling pathway;cAMP signaling pathway;Cholinergic synapse;Glioma;Longevity regulating pathway;Long-term potentiation;Neurotrophin signaling pathway;Osteoclast differentiation;Oxytocin signaling pathway	Activation of NMDA receptors and postsynaptic events;Ca-dependent events;Calmodulin induced events;CaM pathway;CaMK IV-mediated phosphorylation of CREB;CREB1 phosphorylation through the activation of CaMKII/CaMKK/CaMKIV cascasde;DAG and IP3 signaling;Disease;G alpha (i) signalling events;Gene expression (Transcription);Generic Transcription Pathway;GPCR downstream signalling;G-protein mediated ev…	28;28;28;15;15;6;6;5;5;4;4;4;1	28;28;28;15;15;6;6;5;5;4;4;4;1	27;27;27;14;14;6;6;5;5;4;4;4;1
7331	ENSP00000282397;P17948;ENSP00000437631;P17948-3;ENSP00000491097;A0A1W2PNW4;ENSP00000484039;P17948-2;ENSP00000442630;P17948-4	ENSP00000282397;P17948;ENSP00000437631;P17948-3;ENSP00000491097;A0A1W2PNW4;ENSP00000484039;P17948-2;ENSP00000442630;P17948-4	Vascular endothelial growth factor receptor 1	FLT1		Unspecific	9.11421	8.12948	-3.2712	9.15701	0.000342861	+	Focal adhesion;HIF-1 signaling pathway;MAPK signaling pathway;PI3K-Akt signaling pathway;Rap1 signaling pathway;Ras signaling pathway;Rheumatoid arthritis;Transcriptional misregulation in cancer	Neurophilin interactions with VEGF and VEGFR;Signal Transduction;Signaling by Receptor Tyrosine Kinases;Signaling by VEGF;VEGF binds to VEGFR leading to receptor dimerization;VEGF ligand-receptor interactions	37;37;36;36;34;34;34;34;26;26	37;37;36;36;34;34;34;34;26;26	35;35;35;35;33;33;33;33;25;25
7334	ENSP00000414856_p.H106D;ENSP00000414856_p.A49D;ENSP00000414856;ENSP00000282470_p.H106D;ENSP00000282470_p.A49D;ENSP00000282470;Q14515;ENSP00000422903;Q14515-2;ENSP00000416971_p.H106D;ENSP00000416971_p.A49D;ENSP00000416971;C9JJR8;ENSP00000423483_p.H106D;ENSP00000423483_p.A49D;ENSP00000423483;E9PC64;ENSP00000423448_p.H106D;ENSP00000423448_p.A49D;ENSP00000423448;D6RA29;F5H331;ENSP00000438188_p.H106D;…	ENSP00000414856_p.H106D;ENSP00000414856_p.A49D;ENSP00000414856;ENSP00000282470_p.H106D;ENSP00000282470_p.A49D;ENSP00000282470;Q14515;ENSP00000422903;Q14515-2	SPARC-like protein 1	SPARCL1	ENSP00000414856_p.H106D;ENSP00000414856_p.A49D;ENSP00000414856_p.H106D;ENSP00000414856_p.A49D;ENSP00000282470_p.H106D;ENSP00000282470_p.A49D;ENSP00000282470_p.H106D;ENSP00000282470_p.A49D;;;;ENSP00000416971_p.H106D;ENSP00000416971_p.A49D;ENSP00000416971_p.H106D;ENSP00000416971_p.A49D;;ENSP00000423483_p.H106D;ENSP00000423483_p.A49D;ENSP00000423483_p.H106D;ENSP00000423483_p.A49D;;ENSP00000423448_p.…	Unspecific	7.22044	9.31425	6.9555	9.31774	4.25451e-14	+		Metabolism of proteins;Post-translational protein modification;Post-translational protein phosphorylation;Regulation of Insulin-like Growth Factor (IGF) transport and uptake by Insulin-like Growth Factor Binding Proteins (IGFBPs)	26;26;26;26;26;26;26;24;24;2;2;2;2;2;2;2;2;1;1;1;1;1;1;1;1	26;26;26;26;26;26;26;24;24;2;2;2;2;2;2;2;2;1;1;1;1;1;1;1;1	21;21;21;21;21;21;21;19;19;2;2;2;2;2;2;2;2;1;1;1;1;1;1;1;1
7352	ENSP00000420984;ENSP00000282908;Q9NY57-2;Q9NY57;ENSP00000423209_p.R121G;ENSP00000423209;E9PCC0;ENSP00000420984_p.R151G;ENSP00000282908_p.R198G	ENSP00000420984;ENSP00000282908;Q9NY57-2;Q9NY57;ENSP00000423209_p.R121G;ENSP00000423209;E9PCC0;ENSP00000420984_p.R151G;ENSP00000282908_p.R198G	Serine/threonine-protein kinase 32B	STK32B	ENSP00000420984_p.R151G;ENSP00000282908_p.R198G;;;ENSP00000423209_p.R121G;ENSP00000423209_p.R121G;;ENSP00000420984_p.R151G;ENSP00000282908_p.R198G	Ref	8.05608	6.30044	-5.83212	8.06364	0.00108309	+			9;9;9;9;7;7;7;7;7	9;9;9;9;7;7;7;7;7	6;6;6;6;4;4;4;4;4
7406	Q53GG5-2;ENSP00000284771;Q53GG5-3	Q53GG5-2;ENSP00000284771;Q53GG5-3				Unspecific	7.42605	9.23971	6.02486	9.24633	4.97465e-10	+			26;26;17	12;12;7	4;4;3
7427	ENSP00000437797;ENSP00000285208;Q9NRW1;P61294;ENSP00000419381;Q9NRW1-2;J3KR73;ENSP00000419941;ENSP00000418540;C9J0I2	ENSP00000437797;ENSP00000285208;Q9NRW1;P61294;ENSP00000419381;Q9NRW1-2;J3KR73;ENSP00000419941	Ras-related protein Rab-6B	RAB6B;Rab6b		Unspecific	6.81632	8.40057	5.26276	8.41174	0.000168331	+		COPI-independent Golgi-to-ER retrograde traffic;Golgi-to-ER retrograde transport;Intra-Golgi and retrograde Golgi-to-ER traffic;Membrane Trafficking;Metabolism of proteins;Post-translational protein modification;RAB GEFs exchange GTP for GDP on RABs;RAB geranylgeranylation;Rab regulation of trafficking;Retrograde transport at the Trans-Golgi-Network;TBC/RABGAPs;Vesicle-mediated transport	18;18;18;18;14;14;10;10;4;4	6;6;6;6;6;6;2;2;0;0	6;6;6;6;6;6;2;2;0;0
7450	ENSP00000486609_p.S76T;ENSP00000285947_p.S76T;ENSP00000486609_p.K209E;ENSP00000486609;ENSP00000285947_p.K209E;ENSP00000285947;Q8NE22-2;Q8NE22;ENSP00000406183;C9J935;F8WBJ9;ENSP00000398449	ENSP00000486609_p.S76T;ENSP00000285947_p.S76T;ENSP00000486609_p.K209E;ENSP00000486609;ENSP00000285947_p.K209E;ENSP00000285947;Q8NE22-2;Q8NE22	SET domain-containing protein 9	SETD9	ENSP00000486609_p.S76T;ENSP00000285947_p.S76T;ENSP00000486609_p.K209E;ENSP00000486609_p.S76T;ENSP00000486609_p.K209E;ENSP00000285947_p.K209E;ENSP00000285947_p.S76T;ENSP00000285947_p.K209E;;;;;;	Alt	5.59912	7.30894	5.6799	7.31733	0.000810171	+		Gene expression (Transcription);Generic Transcription Pathway;Regulation of TP53 Activity;Regulation of TP53 Activity through Methylation;RNA Polymerase II Transcription;Transcriptional Regulation by TP53	8;8;7;7;7;7;7;7;2;2;1;1	8;8;7;7;7;7;7;7;2;2;1;1	8;8;7;7;7;7;7;7;2;2;1;1
7609	ENSP00000483599_p.A122E;ENSP00000394832_p.A122E;ENSP00000290902_p.A122E;Q9BUD6;ENSP00000483599_p.V242L;ENSP00000483599_p.R38G;ENSP00000483599_p.L40P;ENSP00000483599;ENSP00000394832_p.V242L;ENSP00000394832_p.R38G;ENSP00000394832_p.L40P;ENSP00000394832;ENSP00000290902_p.V242L;ENSP00000290902_p.R38G;ENSP00000290902_p.L40P;ENSP00000290902;ENSP00000424542_p.R38G;ENSP00000424542_p.L40P;ENSP00000424542;…	ENSP00000483599_p.A122E;ENSP00000394832_p.A122E;ENSP00000290902_p.A122E;Q9BUD6;ENSP00000483599_p.V242L;ENSP00000483599_p.R38G;ENSP00000483599_p.L40P;ENSP00000483599;ENSP00000394832_p.V242L;ENSP00000394832_p.R38G;ENSP00000394832_p.L40P;ENSP00000394832;ENSP00000290902_p.V242L;ENSP00000290902_p.R38G;ENSP00000290902_p.L40P;ENSP00000290902	Spondin-2	SPON2	ENSP00000483599_p.A122E;ENSP00000394832_p.A122E;ENSP00000290902_p.A122E;;ENSP00000483599_p.V242L;ENSP00000483599_p.R38G;ENSP00000483599_p.L40P;ENSP00000483599_p.A122E;ENSP00000483599_p.V242L;ENSP00000483599_p.L40P;ENSP00000483599_p.R38G;ENSP00000394832_p.V242L;ENSP00000394832_p.R38G;ENSP00000394832_p.L40P;ENSP00000394832_p.A122E;ENSP00000394832_p.V242L;ENSP00000394832_p.L40P;ENSP00000394832_p.R38…	Alt	6.67129	9.22335	8.47777	9.22457	7.35368e-19	+		Defective B3GALTL causes Peters-plus syndrome (PpS);Disease;Diseases associated with O-glycosylation of proteins;Diseases of glycosylation;Metabolism of proteins;O-glycosylation of TSR domain-containing proteins;O-linked glycosylation;Post-translational protein modification	12;12;12;12;10;10;10;10;10;10;10;10;10;10;10;10;5;5;5;5;2;2;2;2;2;2;2;2	12;12;12;12;10;10;10;10;10;10;10;10;10;10;10;10;5;5;5;5;2;2;2;2;2;2;2;2	8;8;8;8;6;6;6;6;6;6;6;6;6;6;6;6;2;2;2;2;1;1;1;1;1;1;1;1
7610	ENSP00000290913;Q9BRQ6;ENSP00000290913_p.A95S;J3QTA6;ENSP00000422912;ENSP00000422912_p.A95S;J3QTB2;ENSP00000427517;ENSP00000427517_p.A95S;ENSP00000422787;H0Y922;ENSP00000422787_p.A28S	ENSP00000290913;Q9BRQ6;ENSP00000290913_p.A95S;J3QTA6;ENSP00000422912;ENSP00000422912_p.A95S;J3QTB2;ENSP00000427517;ENSP00000427517_p.A95S;ENSP00000422787;H0Y922	MICOS complex subunit MIC25	CHCHD6	ENSP00000290913_p.A95S;;ENSP00000290913_p.A95S;;ENSP00000422912_p.A95S;ENSP00000422912_p.A95S;;ENSP00000427517_p.A95S;ENSP00000427517_p.A95S;ENSP00000422787_p.A28S;;ENSP00000422787_p.A28S	Ref	7.61899	8.77792	3.84988	8.80704	0.000340705	+		Cristae formation;Mitochondrial biogenesis;Organelle biogenesis and maintenance	14;14;13;13;13;12;8;8;7;7;7;6	14;14;13;13;13;12;8;8;7;7;7;6	14;14;13;13;13;12;8;8;7;7;7;6
7637	ENSP00000380769_p.I37L;ENSP00000291700_p.I37L;ENSP00000380769_p.K30N;ENSP00000380769;ENSP00000291700_p.K30N;ENSP00000291700;P50114;P04271;ENSP00000356038_p.K30N;ENSP00000356038_p.I37L;ENSP00000356038;A8MRB1	ENSP00000380769_p.I37L;ENSP00000291700_p.I37L;ENSP00000380769_p.K30N;ENSP00000380769;ENSP00000291700_p.K30N;ENSP00000291700;P50114;P04271	Protein S100-B	S100b;S100B	ENSP00000380769_p.I37L;ENSP00000291700_p.I37L;ENSP00000380769_p.K30N;ENSP00000380769_p.I37L;ENSP00000380769_p.K30N;ENSP00000291700_p.K30N;ENSP00000291700_p.I37L;ENSP00000291700_p.K30N;;;ENSP00000356038_p.K30N;ENSP00000356038_p.I37L;ENSP00000356038_p.I37L;ENSP00000356038_p.K30N;	Alt	9.49188	10.268	2.57811	10.3352	0.000243527	+		Advanced glycosylation endproduct receptor signaling;Cytokine Signaling in Immune system;DDX58/IFIH1-mediated induction of interferon-alpha/beta;Immune System;Innate Immune System;Interleukin-1 family signaling;Interleukin-1 signaling;MyD88 cascade initiated on plasma membrane;MyD88 dependent cascade initiated on endosome;MyD88:MAL(TIRAP) cascade initiated on plasma membrane;MyD88-independent TLR…	5;5;3;3;3;3;3;3;2;2;2;2	5;5;3;3;3;3;3;3;2;2;2;2	5;5;3;3;3;3;3;3;2;2;2;2
7696	ENSP00000293373_p.K472Q;ENSP00000293373;P55160;ENSP00000445596_p.K422Q;ENSP00000445596;P55160-2;F8W050;ENSP00000447246	ENSP00000293373_p.K472Q;ENSP00000293373;P55160;ENSP00000445596_p.K422Q;ENSP00000445596;P55160-2;F8W050;ENSP00000447246	Nck-associated protein 1-like	NCKAP1L	ENSP00000293373_p.K472Q;ENSP00000293373_p.K472Q;;ENSP00000445596_p.K422Q;ENSP00000445596_p.K422Q;;;	Unspecific	8.84313	6.81675	-6.7315	8.8472	1.54731e-11	+	Pathogenic Escherichia coli infection;Regulation of actin cytoskeleton	Fcgamma receptor (FCGR) dependent phagocytosis;Immune System;Innate Immune System;Neutrophil degranulation;Regulation of actin dynamics for phagocytic cup formation;RHO GTPase Effectors;RHO GTPases Activate WASPs and WAVEs;Signal Transduction;Signaling by Receptor Tyrosine Kinases;Signaling by Rho GTPases;Signaling by VEGF;VEGFA-VEGFR2 Pathway	39;39;39;33;33;33;22;22	16;16;16;14;14;14;5;5	16;16;16;14;14;14;5;5
7735	ENSP00000294435;Q96R05	ENSP00000294435;Q96R05	Retinoid-binding protein 7	RBP7		Unspecific	7.07326	8.81398	5.78255	8.8218	3.88478e-08	+			7;7	7;7	7;7
7780	ENSP00000386844_p.T2863I;ENSP00000315873_p.T2863I;LRG_473p1_p.T3069I;ENSP00000295550_p.T3069I;ENSP00000386844_p.(A2750_A2754)del;ENSP00000315873_p.(A2750_A2754)del;ENSP00000386844_p.M2782V;ENSP00000386844_p.M2721T;ENSP00000386844_p.A2806P;ENSP00000386844;ENSP00000315873_p.M2782V;ENSP00000315873_p.M2721T;ENSP00000315873_p.A2806P;ENSP00000315873;LRG_473p1_p.(A2956_A2960)del;ENSP00000295550_p.(A2956…	ENSP00000386844_p.T2863I;ENSP00000315873_p.T2863I;LRG_473p1_p.T3069I;ENSP00000295550_p.T3069I;ENSP00000386844_p.(A2750_A2754)del;ENSP00000315873_p.(A2750_A2754)del;ENSP00000386844_p.M2782V;ENSP00000386844_p.M2721T;ENSP00000386844_p.A2806P;ENSP00000386844;ENSP00000315873_p.M2782V;ENSP00000315873_p.M2721T;ENSP00000315873_p.A2806P;ENSP00000315873;LRG_473p1_p.(A2956_A2960)del;ENSP00000295550_p.(A2956…	Collagen alpha-3(VI) chain	COL6A3	ENSP00000386844_p.T2863I;ENSP00000315873_p.T2863I;LRG_473p1_p.T3069I;ENSP00000295550_p.T3069I;ENSP00000386844_p.(A2750_A2754)del;ENSP00000315873_p.(A2750_A2754)del;ENSP00000386844_p.M2782V;ENSP00000386844_p.M2721T;ENSP00000386844_p.A2806P;ENSP00000386844_p.G76V;ENSP00000386844_p.T2863I;ENSP00000386844_p.A2806P;ENSP00000386844_p.M2782V;ENSP00000386844_p.(A2750_A2754)del;ENSP00000386844_p.M2721T;EN…	Alt	9.68481	8.1186	-5.20285	9.69644	7.35488e-12	+	ECM-receptor interaction;Focal adhesion;Human papillomavirus infection;PI3K-Akt signaling pathway;Protein digestion and absorption	Assembly of collagen fibrils and other multimeric structures;Axon guidance;Collagen biosynthesis and modifying enzymes;Collagen chain trimerization;Collagen degradation;Collagen formation;Degradation of the extracellular matrix;Developmental Biology;ECM proteoglycans;Extracellular matrix organization;Integrin cell surface interactions;NCAM signaling for neurite out-growth;NCAM1 interactions;Signa…	198;198;198;198;197;197;197;197;197;197;197;197;197;197;197;197;197;197;197;197;197;197;197;197;197;197;196;196;196;196;89;89;88;79;79;9;9;8	153;153;153;153;152;152;152;152;152;152;152;152;152;152;152;152;152;152;152;152;152;152;152;152;152;152;151;151;151;151;83;83;82;76;76;6;6;5	8;8;8;8;8;8;8;8;8;8;8;8;8;8;8;8;8;8;8;8;8;8;8;8;8;8;8;8;8;8;8;8;8;8;8;0;0;0
7789	ENSP00000295666_p.L11F;ENSP00000295666;Q16270;ENSP00000486293_p.L11F;ENSP00000486293;Q16270-2	ENSP00000295666_p.L11F;ENSP00000295666;Q16270;ENSP00000486293_p.L11F;ENSP00000486293;Q16270-2	Insulin-like growth factor-binding protein 7	IGFBP7	ENSP00000295666_p.L11F;ENSP00000295666_p.L11F;;ENSP00000486293_p.L11F;ENSP00000486293_p.L11F;	Unspecific	8.00051	9.49504	4.96474	9.50873	2.16339e-06	+		Cellular responses to external stimuli;Cellular responses to stress;Cellular Senescence;Metabolism of proteins;Post-translational protein modification;Post-translational protein phosphorylation;Regulation of Insulin-like Growth Factor (IGF) transport and uptake by Insulin-like Growth Factor Binding Proteins (IGFBPs);Senescence-Associated Secretory Phenotype (SASP)	15;15;15;14;14;14	15;15;15;14;14;14	13;13;13;12;12;12
7820	ENSP00000295927_p.A48D;ENSP00000295927;P26022	ENSP00000295927_p.A48D;ENSP00000295927;P26022	Pentraxin-related protein PTX3	PTX3	ENSP00000295927_p.A48D;ENSP00000295927_p.A48D;	Unspecific	9.18783	7.52141	-5.53572	9.19709	4.29248e-09	+		Immune System;Innate Immune System;Neutrophil degranulation	21;21;21	18;18;18	18;18;18
7923	ENSP00000296824;Q96BQ5;ENSP00000411206;D6R9R2	ENSP00000296824;Q96BQ5	Coiled-coil domain-containing protein 127	CCDC127		Unspecific	7.54473	9.42721	6.25348	9.43287	1.47265e-09	+			20;20;1;1	20;20;1;1	14;14;1;1
7929	ENSP00000297029;Q9Y6U3;ENSP00000297029_p.H61R;ENSP00000430997;Q9Y6U3-3	ENSP00000297029;Q9Y6U3;ENSP00000297029_p.H61R;ENSP00000430997;Q9Y6U3-3	Adseverin	SCIN	ENSP00000297029_p.H61R;;ENSP00000297029_p.H61R;;	Ref	7.42619	9.78358	7.8311	9.78549	1.1262e-17	+	Fc gamma R-mediated phagocytosis;Regulation of actin cytoskeleton;Viral carcinogenesis		50;50;49;34;34	50;50;49;34;34	9;9;9;9;9
7972	ENSP00000297785;P00352;Q5SYQ9;ENSP00000366138;Q5SYQ8;ENSP00000388026;Q5SYQ7;ENSP00000401361	ENSP00000297785;P00352	Retinal dehydrogenase 1	ALDH1A1		Unspecific	8.95865	10.4396	4.91951	10.4537	2.62148e-13	+	Metabolic pathways;Retinol metabolism	Biological oxidations;Ethanol oxidation;Fructose catabolism;Fructose metabolism;Metabolism;Metabolism of carbohydrates;Phase I - Functionalization of compounds;RA biosynthesis pathway;Signal Transduction;Signaling by Nuclear Receptors;Signaling by Retinoic Acid	36;36;16;16;16;16;15;15	32;32;14;14;14;14;13;13	25;25;11;11;11;11;10;10
7986	ENSP00000298248;Q9Y2S2;ENSP00000493818;ENSP00000372262;ENSP00000298248_p.N244H;Q9Y2S2-2;ENSP00000493818_p.N222H;ENSP00000372262_p.N222H;ENSP00000493784;A0A2R8Y4K2;ENSP00000494114_p.N244H;ENSP00000494114;A0A2R8YCZ4;ENSP00000493784_p.N190H;ENSP00000495342;A0A2R8YFQ7;ENSP00000479908;A0A087WW38;ENSP00000496154;A0A2R8Y7B4;ENSP00000494794;A0A2R8Y5S5	ENSP00000298248;Q9Y2S2;ENSP00000493818;ENSP00000372262;ENSP00000298248_p.N244H;Q9Y2S2-2;ENSP00000493818_p.N222H;ENSP00000372262_p.N222H;ENSP00000493784;A0A2R8Y4K2;ENSP00000494114_p.N244H;ENSP00000494114;A0A2R8YCZ4;ENSP00000493784_p.N190H;ENSP00000495342;A0A2R8YFQ7	Lambda-crystallin homolog	CRYL1	ENSP00000298248_p.N244H;;ENSP00000493818_p.N222H;ENSP00000372262_p.N222H;ENSP00000298248_p.N244H;;ENSP00000493818_p.N222H;ENSP00000372262_p.N222H;ENSP00000493784_p.N190H;;ENSP00000494114_p.N244H;ENSP00000494114_p.N244H;;ENSP00000493784_p.N190H;;;;;;;;	Ref	7.48127	8.99565	5.03067	9.00874	1.05383e-06	+	Metabolic pathways;Pentose and glucuronate interconversions	Formation of xylulose-5-phosphate;Metabolism;Metabolism of carbohydrates	22;22;21;21;21;21;20;20;16;16;15;15;15;15;14;14;10;10;4;4;4;4	22;22;21;21;21;21;20;20;16;16;15;15;15;15;14;14;10;10;4;4;4;4	21;21;20;20;20;20;19;19;15;15;15;15;15;14;14;14;10;10;4;4;4;4
8010	ENSP00000451712;ENSP00000380956;ENSP00000380951;ENSP00000380949;ENSP00000298687;Q9UN36;ENSP00000380945;Q9UN36-3;G3V578;ENSP00000452216;ENSP00000452117;H0YJT9;G3V2I9;ENSP00000450691;G3V5S0;ENSP00000452482;G3V383;ENSP00000451094;G3V5L7;ENSP00000452413;ENSP00000489341;A0A0U1RR50;G3V5B5;ENSP00000452274;G3V5P9;ENSP00000452458;G3V2S0;ENSP00000450825;G3V552;ENSP00000452179;G3V3P6;ENSP00000451353;G3V4T9;…	ENSP00000451712;ENSP00000380956;ENSP00000380951;ENSP00000380949;ENSP00000298687;Q9UN36;ENSP00000380945;Q9UN36-3;G3V578;ENSP00000452216;ENSP00000452117;H0YJT9;G3V2I9;ENSP00000450691	Protein NDRG2	NDRG2		Unspecific	7.31704	8.78003	4.85996	8.79474	4.59611e-06	+			21;21;21;21;21;21;20;20;14;14;14;14;12;12;10;10;9;9;9;9;8;8;7;7;7;7;7;7;7;7;7;7;7;7;7;7;7;7;7;7;7;7;6;6;3;3;3;3;3;3	11;11;11;11;11;11;11;11;7;7;7;7;7;7;5;5;4;4;4;4;4;4;4;4;4;4;4;4;4;4;4;4;4;4;4;4;4;4;4;4;4;4;3;3;2;2;1;1;1;1	1;1;1;1;1;1;1;1;0;0;0;0;1;1;1;1;1;1;0;0;0;0;1;1;1;1;1;1;1;1;1;1;1;1;1;1;1;1;1;1;1;1;0;0;0;0;0;0;0;0
8049	ENSP00000299314;Q3T906;ENSP00000449150;Q3T906-2;H0YIE6;ENSP00000449217	ENSP00000299314;Q3T906	N-acetylglucosamine-1-phosphotransferase subunits alpha/beta;N-acetylglucosamine-1-phosphotransferase subunit alpha;N-acetylglucosamine-1-phosphotransferase subunit beta	GNPTAB		Unspecific	7.82625	9.02697	3.98869	9.0535	0.000213075	+	Lysosome		44;44;18;18;7;7	44;44;18;18;7;7	22;22;10;10;6;6
8084	ENSP00000388744_p.G15D;ENSP00000388744;ENSP00000299759_p.G15D;ENSP00000299759;P55042;ENSP00000461995;J3KRG9;ENSP00000462559;J3KSM6;ENSP00000267396_p.G96A;ENSP00000267396;E9Q4D5;Q8VEL9-2;Q8IYK8;Q8VEL9	ENSP00000388744_p.G15D;ENSP00000388744;ENSP00000299759_p.G15D;ENSP00000299759;P55042	GTP-binding protein RAD	RRAD	ENSP00000388744_p.G15D;ENSP00000388744_p.G15D;ENSP00000299759_p.G15D;ENSP00000299759_p.G15D;;;;;;ENSP00000267396_p.G96A;ENSP00000267396_p.G96A;;;;	Unspecific	8.29305	6.41383	-6.24263	8.29875	4.78399e-06	+			16;16;16;16;16;2;2;2;2;1;1;1;1;1;1	16;16;16;16;16;2;2;2;2;1;1;1;1;1;1	4;4;4;4;4;1;1;1;1;0;0;0;0;0;0
8093	ENSP00000441434;ENSP00000299964;P40261	ENSP00000441434;ENSP00000299964;P40261	Nicotinamide N-methyltransferase	NNMT		Unspecific	8.05105	9.41392	4.52734	9.43236	1.76281e-05	+	Metabolic pathways;Nicotinate and nicotinamide metabolism	Biological oxidations;Metabolism;Metabolism of amino acids and derivatives;Metabolism of ingested SeMet, Sec, MeSec into H2Se;Metabolism of vitamins and cofactors;Metabolism of water-soluble vitamins and cofactors;Methylation;Nicotinamide salvaging;Nicotinate metabolism;Phase II - Conjugation of compounds;Selenoamino acid metabolism	16;16;16	16;16;16	12;12;12
8151	ENSP00000300784_p.H146R;ENSP00000300784;Q9H479	ENSP00000300784_p.H146R;ENSP00000300784;Q9H479	Fructosamine-3-kinase	FN3K	ENSP00000300784_p.H146R;ENSP00000300784_p.H146R;	Alt	7.60312	9.39639	5.9571	9.40332	1.51218e-10	+		Gamma carboxylation, hypusine formation and arylsulfatase activation;Metabolism of proteins;Post-translational protein modification	16;15;15	16;15;15	10;9;9
8198	ENSP00000301336;Q96NA2;I3L1U0;ENSP00000459101;A0A0J9YWQ1;Q96NA2-2	ENSP00000301336;Q96NA2;I3L1U0;ENSP00000459101;A0A0J9YWQ1	Rab-interacting lysosomal protein	RILP		Unspecific	5.50964	7.72497	7.35918	7.72761	1.23335e-05	+	Phagosome;Salmonella infection	Adaptive Immune System;Immune System;MHC class II antigen presentation	12;12;6;6;6;4	12;12;6;6;6;4	11;11;5;5;5;3
8292	ENSP00000302768;Q9H074;ENSP00000422084;D6R9H8;G3UZH8;H0YA44;ENSP00000426089	ENSP00000302768;Q9H074	Polyadenylate-binding protein-interacting protein 1	PAIP1		Unspecific	8.91078	9.93964	3.4178	9.97849	0.000236794	+	RNA transport	Deadenylation of mRNA;Deadenylation-dependent mRNA decay;Metabolism of RNA	22;22;8;8;5;1;1	22;22;8;8;5;1;1	1;1;1;1;0;0;0
8304	ENSP00000378155_p.S391F;ENSP00000378155_p.I717V;ENSP00000378155;ENSP00000302935_p.S391F;ENSP00000302935_p.I717V;ENSP00000302935;Q14005-2;Q14005;ENSP00000378147_p.I16V;ENSP00000378147;Q14005-3;ENSP00000453214_p.I20V;ENSP00000453214;H0YLH9;Q14005-4;H0YLL1;ENSP00000453250_p.S391F;ENSP00000453250;H0YKB7;ENSP00000452738_p.S391F;ENSP00000452738;H3BT15;ENSP00000456972_p.S391F;ENSP00000456972;ENSP0000045…	ENSP00000378155_p.S391F;ENSP00000378155_p.I717V;ENSP00000378155;ENSP00000302935_p.S391F;ENSP00000302935_p.I717V;ENSP00000302935;Q14005-2;Q14005;ENSP00000378147_p.I16V;ENSP00000378147;Q14005-3;ENSP00000453214_p.I20V;ENSP00000453214;H0YLH9;Q14005-4	Pro-interleukin-16;Interleukin-16	IL16	ENSP00000378155_p.S391F;ENSP00000378155_p.I717V;ENSP00000378155_p.N1147K;ENSP00000378155_p.S391F;ENSP00000378155_p.I717V;ENSP00000302935_p.S391F;ENSP00000302935_p.I717V;ENSP00000302935_p.N1147K;ENSP00000302935_p.S391F;ENSP00000302935_p.I717V;;;ENSP00000378147_p.I16V;ENSP00000378147_p.N446K;ENSP00000378147_p.I16V;;ENSP00000453214_p.I20V;ENSP00000453214_p.N450K;ENSP00000453214_p.I20V;;;;ENSP0000045…	Ref	9.18491	7.55573	-5.41202	9.19499	9.06762e-09	+	Cytokine-cytokine receptor interaction	Cytokine Signaling in Immune system;Immune System;Other interleukin signaling;Signaling by Interleukins	50;50;50;50;50;50;50;50;41;41;41;37;37;37;35;7;7;7;6;6;6;6;6;6;1;1;1	50;50;50;50;50;50;50;50;41;41;41;37;37;37;35;7;7;7;6;6;6;6;6;6;1;1;1	0;0;0;0;0;0;0;0;0;0;0;0;0;0;0;0;0;0;0;0;0;0;0;0;0;0;0
8313	ENSP00000303057_p.N190S	ENSP00000303057_p.N190S			ENSP00000303057_p.N190S	Alt	6.42648	8.02636	5.31468	8.03714	0.000701997	+			5	3	1
8322	ENSP00000303158_p.H383Y;ENSP00000303158;Q9H0W5	ENSP00000303158_p.H383Y;ENSP00000303158;Q9H0W5	Coiled-coil domain-containing protein 8	CCDC8	ENSP00000303158_p.H383Y;ENSP00000303158_p.H383Y;	Unspecific	8.59395	7.03022	-5.19462	8.60565	6.87036e-06	+		Metabolism of proteins;Neddylation;Post-translational protein modification	14;14;14	14;14;14	13;13;13
8373	ENSP00000304133;P13521;ENSP00000415468;C9JDT0;ENSP00000394702;C9JQI2;Q4W8U9;Q03517	ENSP00000304133;P13521	Secretogranin-2;Secretoneurin	SCG2		Unspecific	8.70461	6.32981	-7.8889	8.70644	1.63058e-10	+		Metabolism of proteins;Post-translational protein modification;Post-translational protein phosphorylation;Regulation of Insulin-like Growth Factor (IGF) transport and uptake by Insulin-like Growth Factor Binding Proteins (IGFBPs)	4;4;1;1;1;1;1;1	4;4;1;1;1;1;1;1	4;4;1;1;1;1;1;1
8400	ENSP00000304592;P49327;ENSP00000304592_p.E719K;ENSP00000304592_p.R703L;ENSP00000488964;A0A0U1RQF0;ENSP00000488964_p.E719K;ENSP00000488964_p.R703L;ENSP00000489514;A0A0U1RRG3;ENSP00000489808;A0A1B0GTR5;A0A0U1RPP5;ENSP00000462949;J3KTF0	ENSP00000304592;P49327;ENSP00000304592_p.E719K;ENSP00000304592_p.R703L;ENSP00000488964;A0A0U1RQF0;ENSP00000488964_p.E719K;ENSP00000488964_p.R703L	Fatty acid synthase;[Acyl-carrier-protein] S-acetyltransferase;[Acyl-carrier-protein] S-malonyltransferase;3-oxoacyl-[acyl-carrier-protein] synthase;3-oxoacyl-[acyl-carrier-protein] reductase;3-hydroxyacyl-[acyl-carrier-protein] dehydratase;Enoyl-[acyl-carrier-protein] reductase;Oleoyl-[acyl-carrier-protein] hydrolase	FASN	ENSP00000304592_p.E719K;ENSP00000304592_p.R703L;;ENSP00000304592_p.E719K;ENSP00000304592_p.R703L;ENSP00000488964_p.E719K;ENSP00000488964_p.R703L;;ENSP00000488964_p.E719K;ENSP00000488964_p.R703L;;;;;;;	Ref	10.4834	11.1677	2.27317	11.2494	0.00140098	+	AMPK signaling pathway;Fatty acid biosynthesis;Fatty acid metabolism;Insulin signaling pathway;Metabolic pathways	Activation of gene expression by SREBF (SREBP);ChREBP activates metabolic gene expression;Fatty acid metabolism;Fatty acyl-CoA biosynthesis;Integration of energy metabolism;Metabolism;Metabolism of lipids;Metabolism of steroids;Metabolism of vitamins and cofactors;Metabolism of water-soluble vitamins and cofactors;NR1H2 & NR1H3 regulate gene expression linked to lipogenesis;NR1H2 and NR1H3-mediat…	171;171;170;170;169;169;168;168;11;11;1;1;1;1;1	171;171;170;170;169;169;168;168;11;11;1;1;1;1;1	156;156;155;155;154;154;153;153;8;8;0;0;0;1;1
8427	ENSP00000305010;ENSP00000377372;P17677;P17677-2;P06837	ENSP00000305010;ENSP00000377372;P17677;P17677-2	Neuromodulin	GAP43	ENSP00000305010_p.V78M;ENSP00000377372_p.V114M;;;	Alt+Ref	9.90736	7.95243	-6.49413	9.91215	5.29394e-20	+		Axon guidance;Developmental Biology;L1CAM interactions	14;14;14;14;1	14;14;14;14;1	1;1;1;1;0
8429	ENSP00000305027_p.G1097S;ENSP00000305027_p.M602T;ENSP00000305027_p.H1359N;ENSP00000305027_p.A162V;ENSP00000305027;Q9Y4B5;ENSP00000305027_p.R338L;ENSP00000305027_p.D898G;ENSP00000429556_p.G737S;ENSP00000382924_p.G778S;ENSP00000352927_p.G778S;ENSP00000429556_p.M242T;ENSP00000429556_p.H999N;ENSP00000429556;ENSP00000382924_p.M242T;ENSP00000382924_p.H1040N;ENSP00000382924;ENSP00000352927_p.M242T;ENSP0…	ENSP00000305027_p.G1097S;ENSP00000305027_p.M602T;ENSP00000305027_p.H1359N;ENSP00000305027_p.A162V;ENSP00000305027;Q9Y4B5;ENSP00000305027_p.R338L;ENSP00000305027_p.D898G;ENSP00000429556_p.G737S;ENSP00000382924_p.G778S;ENSP00000352927_p.G778S;ENSP00000429556_p.M242T;ENSP00000429556_p.H999N;ENSP00000429556;ENSP00000382924_p.M242T;ENSP00000382924_p.H1040N;ENSP00000382924;ENSP00000352927_p.M242T;ENSP0…	Microtubule cross-linking factor 1	MTCL1	ENSP00000305027_p.G1097S;ENSP00000305027_p.M602T;ENSP00000305027_p.H1359N;ENSP00000305027_p.A162V;ENSP00000305027_p.D898G;ENSP00000305027_p.G1097S;ENSP00000305027_p.Q861R;ENSP00000305027_p.R338L;ENSP00000305027_p.A162V;ENSP00000305027_p.M602T;ENSP00000305027_p.H1359N;;ENSP00000305027_p.R338L;ENSP00000305027_p.D898G;ENSP00000429556_p.G737S;ENSP00000382924_p.G778S;ENSP00000352927_p.G778S;ENSP000004…	Alt+Ref	6.07496	7.83229	5.8377	7.83981	0.000579332	+			64;63;63;63;63;63;62;62;50;50;50;49;49;49;49;49;49;49;49;49;49;49;48;48;48;11;11;11;1;1	61;60;60;60;60;60;59;59;47;47;47;46;46;46;46;46;46;46;46;46;46;46;45;45;45;8;8;8;1;1	0;0;0;0;0;0;0;0;0;0;0;0;0;0;0;0;0;0;0;0;0;0;0;0;0;0;0;0;0;0
8463	ENSP00000305675;O95810;ENSP00000305675_p.E221G	ENSP00000305675;O95810;ENSP00000305675_p.E221G	Serum deprivation-response protein	SDPR	ENSP00000305675_p.E221G;;ENSP00000305675_p.E221G	Ref	8.93072	7.86851	-3.52857	8.96681	0.000150525	+			26;26;25	26;26;25	18;18;17
8509	ENSP00000306228;ENSP00000378856_p.G176E;ENSP00000378856;O00182-3;O00182-2;O00182-6;O00182;ENSP00000318214;O00182-5;O00182-4;J3KS82;ENSP00000462359;J3QS92;ENSP00000464581_p.G23E;ENSP00000464581;ENSP00000462382;J3KSA0	ENSP00000306228;ENSP00000378856_p.G176E;ENSP00000378856;O00182-3;O00182-2;O00182-6;O00182	Galectin-9	LGALS9	;ENSP00000378856_p.G176E;ENSP00000378856_p.G176E;;;;;;;;;;;ENSP00000464581_p.G23E;ENSP00000464581_p.G23E;;	Unspecific	8.6187	7.09492	-5.0619	8.63151	1.13657e-05	+		Cytokine Signaling in Immune system;Immune System;Interleukin-2 family signaling;Signaling by Interleukins	10;10;10;10;10;10;10;4;4;4;3;3;2;2;2;1;1	10;10;10;10;10;10;10;4;4;4;3;3;2;2;2;1;1	6;6;6;6;6;6;6;2;2;2;1;1;1;1;1;1;1
8536	ENSP00000306844;Q9C0C4;ENSP00000391094;C9J4M7;ENSP00000393498;C9JV89	ENSP00000306844;Q9C0C4	Semaphorin-4C	SEMA4C		Unspecific	6.39225	8.01363	5.3861	8.02389	0.000592498	+	Axon guidance		18;18;2;2;2;2	17;17;2;2;2;2	13;13;2;2;2;2
8596	ENSP00000307513_p.V43I;ENSP00000307513_p.E935K;ENSP00000307513_p.D1307E;ENSP00000307513;Q9UBG0;ENSP00000307513_p.R1156H;ENSP00000400445_p.T40M;ENSP00000400445_p.Q25R;ENSP00000400445_p.D173E;ENSP00000400445;E7EME3;J3QQZ6;ENSP00000463968_p.E6K;ENSP00000463968	ENSP00000307513_p.V43I;ENSP00000307513_p.E935K;ENSP00000307513_p.D1307E;ENSP00000307513;Q9UBG0;ENSP00000307513_p.R1156H	C-type mannose receptor 2	MRC2	ENSP00000307513_p.V43I;ENSP00000307513_p.E935K;ENSP00000307513_p.D1307E;ENSP00000307513_p.R1156H;ENSP00000307513_p.D1307E;ENSP00000307513_p.V43I;ENSP00000307513_p.E935K;;ENSP00000307513_p.R1156H;ENSP00000400445_p.T40M;ENSP00000400445_p.Q25R;ENSP00000400445_p.D173E;ENSP00000400445_p.Q25R;ENSP00000400445_p.D173E;ENSP00000400445_p.T40M;;;ENSP00000463968_p.E6K;ENSP00000463968_p.E6K	Ref	9.31455	8.39263	-3.06255	9.36365	8.85286e-05	+	Phagosome;Tuberculosis	Adaptive Immune System;Antigen processing-Cross presentation;Class I MHC mediated antigen processing & presentation;Cross-presentation of soluble exogenous antigens (endosomes);Immune System	48;48;48;48;48;47;5;5;5;5;5;1;1;1	48;48;48;48;48;47;5;5;5;5;5;1;1;1	28;28;28;28;28;27;3;3;3;3;3;1;1;1
8604	ENSP00000307705_p.A204T;ENSP00000307705;P10412;I7HFT9;Q07133	ENSP00000307705_p.A204T;ENSP00000307705;P10412	Histone H1.4	HIST1H1E	ENSP00000307705_p.A204T;ENSP00000307705_p.A204T;;;	Unspecific	10.5272	9.85916	-2.21912	10.6117	0.000550053	+		Apoptosis;Apoptosis induced DNA fragmentation;Apoptotic execution phase;Cellular responses to external stimuli;Cellular responses to stress;Cellular Senescence;DNA Damage/Telomere Stress Induced Senescence;Formation of Senescence-Associated Heterochromatin Foci (SAHF);Programmed Cell Death	24;24;24;5;5	17;17;17;4;4	0;0;0;0;0
8613	ENSP00000385639_p.V153I;ENSP00000385639;ENSP00000360764_p.V153I;ENSP00000360764;ENSP00000360763_p.V153I;ENSP00000360763;ENSP00000307843_p.V153I;ENSP00000307843;Q9UHF1;R4GMT3;ENSP00000473338	ENSP00000385639_p.V153I;ENSP00000385639;ENSP00000360764_p.V153I;ENSP00000360764;ENSP00000360763_p.V153I;ENSP00000360763;ENSP00000307843_p.V153I;ENSP00000307843;Q9UHF1	Epidermal growth factor-like protein 7	EGFL7	ENSP00000385639_p.V153I;ENSP00000385639_p.V153I;ENSP00000360764_p.V153I;ENSP00000360764_p.V153I;ENSP00000360763_p.V153I;ENSP00000360763_p.V153I;ENSP00000307843_p.V153I;ENSP00000307843_p.V153I;;;	Unspecific	8.66107	6.84305	-6.03933	8.66762	7.92871e-07	+			10;10;10;10;10;10;10;10;10;2;2	10;10;10;10;10;10;10;10;10;2;2	9;9;9;9;9;9;9;9;9;2;2
8621	ENSP00000307911;Q9Y4C5;Q9Y4C5-2;Q80WV3	ENSP00000307911;Q9Y4C5;Q9Y4C5-2;Q80WV3	Carbohydrate sulfotransferase 2	CHST2;Chst2		Unspecific	7.92851	5.73296	-7.29349	7.93127	0.000642998	+	Glycosaminoglycan biosynthesis - keratan sulfate	Glycosaminoglycan metabolism;Keratan sulfate biosynthesis;Keratan sulfate/keratin metabolism;Metabolism;Metabolism of carbohydrates	12;12;11;10	12;12;11;10	12;12;11;10
8634	LRG_128p1;ENSP00000308176;Q06187;ENSP00000483570;Q06187-2;U3NG26;ENSP00000479125;Q5JY90;ENSP00000361971	LRG_128p1;ENSP00000308176;Q06187;ENSP00000483570;Q06187-2;U3NG26;ENSP00000479125;Q5JY90;ENSP00000361971	Tyrosine-protein kinase BTK	BTK		Unspecific	9.24958	7.59056	-5.51114	9.259	4.98625e-09	+	B cell receptor signaling pathway;Epstein-Barr virus infection;Fc epsilon RI signaling pathway;NF-kappa B signaling pathway;Osteoclast differentiation;Platelet activation;Primary immunodeficiency	Adaptive Immune System;Antigen activates B Cell Receptor (BCR) leading to generation of second messengers;Antigen processing-Cross presentation;Class I MHC mediated antigen processing & presentation;DAP12 interactions;DAP12 signaling;Disease;Diseases associated with the TLR signaling cascade;Diseases of Immune System;ER-Phagosome pathway;Fc epsilon receptor (FCERI) signaling;FCERI mediated Ca+2 m…	41;41;41;40;40;36;36;29;29	41;41;41;40;40;36;36;29;29	6;6;6;6;6;5;5;5;5
8652	ENSP00000308383;P33241;ENSP00000371194_p.H34Q;ENSP00000371194;P33241-3;ENSP00000400346;E7EMG9;ENSP00000400999;C9JU59;ENSP00000403460_p.R12W;ENSP00000403460_p.A118T;ENSP00000403460;C9JDV1	ENSP00000308383;P33241;ENSP00000371194_p.H34Q;ENSP00000371194;P33241-3;ENSP00000400346;E7EMG9	Lymphocyte-specific protein 1	LSP1	ENSP00000308383_p.A100T;;ENSP00000371194_p.H34Q;ENSP00000371194_p.A228T;ENSP00000371194_p.H34Q;;ENSP00000400346_p.A91T;;ENSP00000400999_p.A83T;;ENSP00000403460_p.R12W;ENSP00000403460_p.A118T;ENSP00000403460_p.R12W;ENSP00000403460_p.A118T;	Alt+Ref	9.79182	7.74722	-6.79201	9.79572	1.10339e-18	+	C-type lectin receptor signaling pathway;Tuberculosis		28;28;27;27;27;22;22;10;10;5;5;5;5	28;28;27;27;27;22;22;10;10;5;5;5;5	0;0;0;0;0;0;0;0;0;0;0;0;0
8699	ENSP00000420506;ENSP00000356248;J3KR55;ENSP00000418416;ENSP00000309116_p.T14M;ENSP00000309116_p.Q37R;ENSP00000309116;P35236;P35236-2;P35236-3;H7C5I3;ENSP00000419993;ENSP00000417350;E9PE54;ENSP00000420434;E7EUM0;F8WF66;ENSP00000485691;ENSP00000419196;ENSP00000418837;C9IYI6;ENSP00000417410;C9JBA9;H7C4T8;ENSP00000418129;REV__O75330-4;REV__ENSP00000402673_p.S42C;REV__ENSP00000402673_p.L509I;REV__ENSP…	ENSP00000420506;ENSP00000356248;J3KR55;ENSP00000418416;ENSP00000309116_p.T14M;ENSP00000309116_p.Q37R;ENSP00000309116;P35236;P35236-2;P35236-3;H7C5I3;ENSP00000419993	Tyrosine-protein phosphatase non-receptor type 7	PTPN7	;;;;ENSP00000309116_p.T14M;ENSP00000309116_p.Q37R;ENSP00000309116_p.Q37R;ENSP00000309116_p.T14M;;;;;;;;;;;;;;;;;;;;;;;;;;;;;;;;;;	Unspecific	8.35937	6.6131	-5.80097	8.36709	2.01553e-05	+	MAPK signaling pathway	Cytokine Signaling in Immune system;Immune System;Interleukin-1 family signaling;Interleukin-37 signaling;Signaling by Interleukins	15;15;15;15;15;15;15;15;15;15;8;8;7;7;7;7;5;5;5;5;5;4;4;4;4;1;1;1;1;1;1;1;1;1;1;1;1;1;1;1;1	15;15;15;15;15;15;15;15;15;15;8;8;7;7;7;7;5;5;5;5;5;4;4;4;4;1;1;1;1;1;1;1;1;1;1;1;1;1;1;1;1	8;8;8;8;8;8;8;8;8;8;4;4;3;3;3;3;2;2;2;2;2;2;2;3;3;0;0;0;0;0;0;0;0;0;0;0;0;0;0;0;0
8752	ENSP00000435295_p.I259V;ENSP00000309953_p.I259V;ENSP00000435295;ENSP00000309953;O95967;ENSP00000434151_p.I259V;ENSP00000434151;E9PRU1;H0YET5;ENSP00000436521;H0YEU0;ENSP00000436536;ENSP00000432191;H0YCR9;ENSP00000436526;E9PI47	ENSP00000435295_p.I259V;ENSP00000309953_p.I259V;ENSP00000435295;ENSP00000309953;O95967;ENSP00000434151_p.I259V;ENSP00000434151;E9PRU1	EGF-containing fibulin-like extracellular matrix protein 2	EFEMP2	ENSP00000435295_p.I259V;ENSP00000309953_p.I259V;ENSP00000435295_p.I259V;ENSP00000309953_p.I259V;;ENSP00000434151_p.I259V;ENSP00000434151_p.I259V;;;;;;;;;	Alt	8.83913	7.61652	-4.06142	8.8644	3.21266e-05	+		Elastic fibre formation;Extracellular matrix organization;Molecules associated with elastic fibres	22;22;21;21;21;19;18;18;6;6;5;5;4;4;4;4	6;6;6;6;6;6;6;6;3;3;2;2;1;1;1;1	6;6;6;6;6;6;6;6;3;3;2;2;1;1;1;1
8864	ENSP00000432568_p.S825G;ENSP00000432568;ENSP00000311489_p.S825G;ENSP00000311489;O15020;ENSP00000433593_p.S825G;ENSP00000433593;O15020-2	ENSP00000432568_p.S825G;ENSP00000432568;ENSP00000311489_p.S825G;ENSP00000311489;O15020;ENSP00000433593_p.S825G;ENSP00000433593;O15020-2	Spectrin beta chain, non-erythrocytic 2	SPTBN2	ENSP00000432568_p.S825G;ENSP00000432568_p.V1034A;ENSP00000432568_p.S825G;ENSP00000311489_p.S825G;ENSP00000311489_p.V1034A;ENSP00000311489_p.S825G;;ENSP00000433593_p.S825G;ENSP00000433593_p.V1034A;ENSP00000433593_p.S825G;	Alt+Ref	7.19254	9.24406	6.81501	9.2479	1.51211e-12	+	NA	Adaptive Immune System;Asparagine N-linked glycosylation;Axon guidance;COPI-mediated anterograde transport;Cytokine Signaling in Immune system;Developmental Biology;ER to Golgi Anterograde Transport;FLT3 Signaling;Immune System;Interaction between L1 and Ankyrins;L1CAM interactions;MAPK family signaling cascades;MAPK1/MAPK3 signaling;Membrane Trafficking;Metabolism of proteins;MHC class II antige…	122;122;122;122;122;117;117;117	105;105;105;105;105;100;100;100	1;1;1;1;1;1;1;1
8886	ENSP00000311809_p.N563H;ENSP00000311809_p.D498N;ENSP00000311809_p.A1029T;ENSP00000311809;Q05707-2;ENSP00000311809_p.V1342L;ENSP00000297848_p.N563H;ENSP00000297848_p.D498N;ENSP00000297848_p.A1029T;ENSP00000297848;Q05707;ENSP00000311809_p.E1094D;ENSP00000297848_p.V1342L;ENSP00000297848_p.E1094D;Q05707-3;J3QT83;ENSP00000409461_p.N376H;ENSP00000409461_p.D311N;ENSP00000409461;ENSP00000247781;A0A0A0MQT…	ENSP00000311809_p.N563H;ENSP00000311809_p.D498N;ENSP00000311809_p.A1029T;ENSP00000311809;Q05707-2;ENSP00000311809_p.V1342L;ENSP00000297848_p.N563H;ENSP00000297848_p.D498N;ENSP00000297848_p.A1029T;ENSP00000297848;Q05707;ENSP00000311809_p.E1094D;ENSP00000297848_p.V1342L;ENSP00000297848_p.E1094D;Q05707-3;J3QT83;ENSP00000409461_p.N376H;ENSP00000409461_p.D311N;ENSP00000409461	Collagen alpha-1(XIV) chain	COL14A1	ENSP00000311809_p.N563H;ENSP00000311809_p.D498N;ENSP00000311809_p.A1029T;ENSP00000311809_p.E1094D;ENSP00000311809_p.V1342L;ENSP00000311809_p.D498N;ENSP00000311809_p.N563H;ENSP00000311809_p.A1029T;;ENSP00000311809_p.V1342L;ENSP00000297848_p.N563H;ENSP00000297848_p.D498N;ENSP00000297848_p.A1029T;ENSP00000297848_p.E1094D;ENSP00000297848_p.V1342L;ENSP00000297848_p.D498N;ENSP00000297848_p.N563H;ENSP00…	Ref	8.58912	9.70761	3.71556	9.73947	0.00010711	+	Protein digestion and absorption	Assembly of collagen fibrils and other multimeric structures;Collagen biosynthesis and modifying enzymes;Collagen chain trimerization;Collagen degradation;Collagen formation;Degradation of the extracellular matrix;Extracellular matrix organization	75;75;75;75;75;74;74;74;74;74;74;73;73;72;64;39;39;39;39;29;29;28;27;23;23;23;23;23;10;10;10;10;2;2;2	48;48;48;48;48;47;47;47;47;47;47;46;46;45;44;25;25;25;25;19;19;18;17;11;11;11;11;11;7;7;7;7;1;1;1	47;47;47;47;47;46;46;46;46;46;46;45;45;44;43;24;24;24;24;19;19;18;17;11;11;11;11;11;7;7;7;7;1;1;1
8909	ENSP00000406952_p.N288K;ENSP00000406952;ENSP00000394458_p.N288K;ENSP00000394458;ENSP00000312185_p.N288K;ENSP00000312185;Q92556;Q92556-3;ENSP00000379360;ENSP00000379355;Q92556-2;Q8BPU7-2;H7C0S6;ENSP00000396465_p.N26K;ENSP00000396465;Q8BPU7-4;ENSP00000416090;C9JIW2;ENSP00000406610;C9IZR8;ENSP00000413108_p.N67K;ENSP00000413108;H7C3P3;H7C0N5;ENSP00000395933_p.N29K;ENSP00000395933;ENSP00000397857;C9J5…	ENSP00000406952_p.N288K;ENSP00000406952;ENSP00000394458_p.N288K;ENSP00000394458;ENSP00000312185_p.N288K;ENSP00000312185;Q92556;Q92556-3	Engulfment and cell motility protein 1	ELMO1	ENSP00000406952_p.N288K;ENSP00000406952_p.N288K;ENSP00000394458_p.N288K;ENSP00000394458_p.N288K;ENSP00000312185_p.N288K;ENSP00000312185_p.N288K;;;;;;;;ENSP00000396465_p.N26K;ENSP00000396465_p.N26K;;;;;;ENSP00000413108_p.N67K;ENSP00000413108_p.N67K;;;ENSP00000395933_p.N29K;ENSP00000395933_p.N29K;;;;	Unspecific	9.45879	8.56674	-2.96331	9.51118	1.62739e-06	+	Bacterial invasion of epithelial cells;Chemokine signaling pathway;Shigellosis	Disease;Fcgamma receptor (FCGR) dependent phagocytosis;HIV Infection;Host Interactions of HIV factors;Immune System;Infectious disease;Innate Immune System;Nef and signal transduction;PTK6 Regulates RHO GTPases, RAS GTPase and MAP kinases;Regulation of actin dynamics for phagocytic cup formation;Signal Transduction;Signaling by Non-Receptor Tyrosine Kinases;Signaling by PTK6;Signaling by Receptor…	44;44;44;44;44;44;44;24;16;16;16;16;12;12;12;12;10;10;10;10;8;8;8;6;6;6;5;5;5;5	44;44;44;44;44;44;44;24;16;16;16;16;12;12;12;12;10;10;10;10;8;8;8;6;6;6;5;5;5;5	2;2;2;2;2;2;2;0;0;0;0;0;1;1;1;0;1;1;1;1;1;1;1;1;1;1;1;1;1;1
8914	ENSP00000312262;P25098;ENSP00000434126;E9PRV7;F6QY34;F7AEX1;A0A0G2JEW1;Q8BX71	ENSP00000312262;P25098;ENSP00000434126;E9PRV7	Beta-adrenergic receptor kinase 1	ADRBK1		Unspecific	9.25436	8.27752	-3.24498	9.29791	3.67363e-05	+	Chemokine signaling pathway;Endocytosis;Glutamatergic synapse;Hedgehog signaling pathway;Morphine addiction;Olfactory transduction	Activation of SMO;Ca-dependent events;Calmodulin induced events;CaM pathway;Cargo recognition for clathrin-mediated endocytosis;Clathrin-mediated endocytosis;DAG and IP3 signaling;G alpha (i) signalling events;G alpha (q) signalling events;G alpha (s) signalling events;GPCR downstream signalling;G-protein mediated events;Hedgehog 'on' state;Intracellular signaling by second messengers;Membrane Tr…	47;47;24;24;8;5;1;1	47;47;24;24;8;5;1;1	8;8;3;3;0;0;0;0
8980	ENSP00000398778;ENSP00000313385;Q8IUW5;ENSP00000424031;D6RBN9	ENSP00000398778;ENSP00000313385;Q8IUW5;ENSP00000424031;D6RBN9	RELT-like protein 1	RELL1		Unspecific	6.60487	8.30621	5.65172	8.31476	0.000370388	+			7;7;7;4;4	7;7;7;4;4	5;5;5;3;3
8986	ENSP00000313432;Q9UBQ7;U3KQ56;ENSP00000475569;ENSP00000432021;Q9UBQ7-2	ENSP00000313432;Q9UBQ7;U3KQ56;ENSP00000475569	Glyoxylate reductase/hydroxypyruvate reductase	GRHPR		Unspecific	9.34089	10.1112	2.5588	10.1792	0.00027378	+	Glycine, serine and threonine metabolism;Glyoxylate and dicarboxylate metabolism;Metabolic pathways;Pyruvate metabolism	Glyoxylate metabolism and glycine degradation;Metabolism;Metabolism of amino acids and derivatives	30;30;23;23;4;4	30;30;23;23;4;4	22;22;17;17;2;2
9117	ENSP00000381581_p.K533E;ENSP00000381581;ENSP00000315757_p.K533E;ENSP00000315757;P13796;Q5TBN3;ENSP00000408052;P13796-2;Q5TBN5;ENSP00000402157	ENSP00000381581_p.K533E;ENSP00000381581;ENSP00000315757_p.K533E;ENSP00000315757;P13796	Plastin-2	LCP1	ENSP00000381581_p.K533E;ENSP00000381581_p.K533E;ENSP00000315757_p.K533E;ENSP00000315757_p.K533E;;;;;;	Unspecific	9.94945	8.47737	-4.89015	9.96385	2.85679e-12	+		Cytokine Signaling in Immune system;Gene and protein expression by JAK-STAT signaling after Interleukin-12 stimulation;Immune System;Interleukin-12 family signaling;Interleukin-12 signaling;Signaling by Interleukins	61;61;61;61;61;20;20;12;5;5	24;24;24;24;24;6;6;8;1;1	22;22;22;22;22;6;6;8;1;1
9161	ENSP00000316772_p.E259D;ENSP00000316772;Q92619;ENSP00000316772_p.S439G;ENSP00000316772_p.R139H;K7EM85;ENSP00000466401_p.E286D;ENSP00000466401;ENSP00000466401_p.R166H;ENSP00000466401_p.S466G;ENSP00000439601_p.E275D;ENSP00000439601;Q92619-2;ENSP00000439601_p.S455G;ENSP00000439601_p.R155H;F5H1R4;ENSP00000438979_p.P9S;ENSP00000438979_p.E142D;ENSP00000438979;ENSP00000438979_p.S322G;K7ES92;ENSP00000468…	ENSP00000316772_p.E259D;ENSP00000316772;Q92619;ENSP00000316772_p.S439G;ENSP00000316772_p.R139H;K7EM85;ENSP00000466401_p.E286D;ENSP00000466401;ENSP00000466401_p.R166H;ENSP00000466401_p.S466G;ENSP00000439601_p.E275D;ENSP00000439601;Q92619-2;ENSP00000439601_p.S455G;ENSP00000439601_p.R155H;F5H1R4;ENSP00000438979_p.P9S;ENSP00000438979_p.E142D;ENSP00000438979;ENSP00000438979_p.S322G;K7ES92;ENSP00000468…	Minor histocompatibility protein HA-1;Minor histocompatibility antigen HA-1	HMHA1	ENSP00000316772_p.E259D;ENSP00000316772_p.R139H;ENSP00000316772_p.S439G;ENSP00000316772_p.E259D;;ENSP00000316772_p.S439G;ENSP00000316772_p.R139H;;ENSP00000466401_p.E286D;ENSP00000466401_p.R166H;ENSP00000466401_p.S466G;ENSP00000466401_p.E286D;ENSP00000466401_p.R166H;ENSP00000466401_p.S466G;ENSP00000439601_p.E275D;ENSP00000439601_p.R155H;ENSP00000439601_p.S455G;ENSP00000439601_p.E275D;;ENSP00000439…	Ref	8.91709	7.62227	-4.3013	8.93857	5.1963e-06	+		Immune System;Innate Immune System;Neutrophil degranulation;Rho GTPase cycle;Signal Transduction;Signaling by Rho GTPases	53;53;53;52;52;50;50;50;49;49;47;47;47;46;46;41;41;41;41;40;28;28;27;7;7;6;3;3;2;2;1	30;30;30;29;29;27;27;27;26;26;27;27;27;26;26;23;23;23;23;22;14;14;13;5;5;4;0;0;2;2;0	3;3;3;3;3;0;0;0;0;0;0;0;0;0;0;0;0;0;0;0;0;0;0;0;0;0;0;0;0;0;0
9193	ENSP00000317469;ENSP00000398526;Q8NFJ9;Q8NFJ9-2;ENSP00000405764;E7EQH1;ENSP00000377563;Q8NFJ9-3;A0A494B9Z5;Q3V3N7;ENSP00000431187;E9PMB7;ENSP00000436073;E9PR55;A0A494B8X5;ENSP00000436927;E9PPR3;A0A494B9R9;ENSP00000436860;E9PQD9	ENSP00000317469;ENSP00000398526;Q8NFJ9;Q8NFJ9-2;ENSP00000405764;E7EQH1;ENSP00000377563;Q8NFJ9-3	Bardet-Biedl syndrome 1 protein	BBS1		Unspecific	6.26614	8.32617	6.84329	8.32994	1.38309e-05	+	African trypanosomiasis;Allograft rejection;alpha-Linolenic acid metabolism;Aminoacyl-tRNA biosynthesis;Amoebiasis;Antigen processing and presentation;Arachidonic acid metabolism;Arginine and proline metabolism;Asthma;Autoimmune thyroid disease;B cell receptor signaling pathway;beta-Alanine metabolism;Calcium signaling pathway;Cell adhesion molecules (CAMs);Chemical carcinogenesis;Cholesterol met…	BBSome-mediated cargo-targeting to cilium;Cargo trafficking to the periciliary membrane;Cilium Assembly;Organelle biogenesis and maintenance	26;26;26;26;20;20;19;19;7;7;6;6;5;5;5;4;4;3;1;1	26;26;26;26;20;20;19;19;7;7;6;6;5;5;5;4;4;3;1;1	26;26;26;26;20;20;19;19;7;7;6;6;5;5;5;4;4;3;1;1
9251	ENSP00000318472_p.T16P;ENSP00000318472_p.E351K;ENSP00000318472;P13591;ENSP00000480797_p.T16P;ENSP00000480797_p.E351K;ENSP00000480797;A0A087WX77;P13591-5	ENSP00000318472_p.T16P;ENSP00000318472_p.E351K;ENSP00000318472;P13591;ENSP00000480797_p.T16P;ENSP00000480797_p.E351K;ENSP00000480797;A0A087WX77;P13591-5	Neural cell adhesion molecule 1	NCAM1	ENSP00000318472_p.T16P;ENSP00000318472_p.E351K;ENSP00000318472_p.E351K;ENSP00000318472_p.T16P;;ENSP00000480797_p.T16P;ENSP00000480797_p.E351K;ENSP00000480797_p.E351K;ENSP00000480797_p.T16P;;	Unspecific	8.22037	9.45292	4.09444	9.47762	0.000116672	+	Cell adhesion molecules (CAMs);Prion diseases	Axon guidance;Cytokine Signaling in Immune system;Developmental Biology;ECM proteoglycans;Extracellular matrix organization;FLT3 Signaling;Immune System;Interferon gamma signaling;Interferon Signaling;L1CAM interactions;MAPK family signaling cascades;MAPK1/MAPK3 signaling;NCAM signaling for neurite out-growth;NCAM1 interactions;RAF/MAP kinase cascade;Signal Transduction;Signal transduction by L1	35;35;35;35;33;33;33;33;20	35;35;35;35;33;33;33;33;20	0;0;0;0;0;0;0;0;0
9258	ENSP00000318602;Q9NRG1;ENSP00000365558;Q9NRG1-2;ENSP00000365556;Q9NRG1-3	ENSP00000318602;Q9NRG1;ENSP00000365558;Q9NRG1-2	Phosphoribosyltransferase domain-containing protein 1	PRTFDC1		Unspecific	6.50172	8.10154	5.31448	8.11232	0.000702334	+			6;6;5;5;2;2	5;5;4;4;2;2	5;5;4;4;2;2
9331	ENSP00000319831_p.N287T;ENSP00000319831;Q9H4E7;G3V2J3;ENSP00000450703;G3V333;ENSP00000451011;ENSP00000415357;H0Y7V7;A0A3B2W486;A0A3B2W860	ENSP00000319831_p.N287T;ENSP00000319831;Q9H4E7	Differentially expressed in FDCP 6 homolog	DEF6	ENSP00000319831_p.N287T;ENSP00000319831_p.N287T;;;;;;;;;	Unspecific	8.59956	7.48699	-3.69587	8.63184	0.00105592	+			25;25;25;1;1;1;1;1;1;1;1	25;25;25;1;1;1;1;1;1;1;1	10;10;10;0;0;0;0;0;0;0;0
9349	ENSP00000320176_p.E361K;ENSP00000320176_p.V436L;ENSP00000320176;ENSP00000320176_p.(363_375)insE_E;P14317;ENSP00000387645_p.E324K;ENSP00000387645_p.V399L;ENSP00000387645;E7EVW7;ENSP00000387645_p.(326_338)insE_E;ENSP00000418299;P14317-2	ENSP00000320176_p.E361K;ENSP00000320176_p.V436L;ENSP00000320176;ENSP00000320176_p.(363_375)insE_E;P14317;ENSP00000387645_p.E324K;ENSP00000387645_p.V399L;ENSP00000387645;E7EVW7;ENSP00000387645_p.(326_338)insE_E	Hematopoietic lineage cell-specific protein	HCLS1	ENSP00000320176_p.E361K;ENSP00000320176_p.V436L;ENSP00000320176_p.E361K;ENSP00000320176_p.T235A;ENSP00000320176_p.V436L;ENSP00000320176_p.(363_375)insE_E;ENSP00000320176_p.(363_375)insE_E;;ENSP00000387645_p.E324K;ENSP00000387645_p.V399L;ENSP00000387645_p.E324K;ENSP00000387645_p.T198A;ENSP00000387645_p.V399L;ENSP00000387645_p.(326_338)insE_E;;ENSP00000387645_p.(326_338)insE_E;;	Alt+Ref	9.27742	7.52859	-5.80949	9.2851	1.95553e-12	+	Bacterial invasion of epithelial cells;Pathogenic Escherichia coli infection;Proteoglycans in cancer;Shigellosis;Tight junction		33;32;32;32;32;30;29;29;29;29;8;8	20;19;19;19;19;20;19;19;19;19;5;5	2;1;1;1;1;2;1;1;1;1;0;0
9352	ENSP00000320204;ENSP00000371634_p.Y396N;ENSP00000371634_p.A393P;ENSP00000371634;F8W930;ENSP00000410242_p.Y402N;ENSP00000410242_p.A399P;ENSP00000410242;Q9Y6M1-1;Q9Y6M1;ENSP00000413787_p.Y333N;ENSP00000413787_p.A330P;ENSP00000413787;Q9Y6M1-5;Q9Y6M1-3;Q9Y6M1-4	ENSP00000320204;ENSP00000371634_p.Y396N;ENSP00000371634_p.A393P;ENSP00000371634;F8W930;ENSP00000410242_p.Y402N;ENSP00000410242_p.A399P;ENSP00000410242;Q9Y6M1-1;Q9Y6M1;ENSP00000413787_p.Y333N;ENSP00000413787_p.A330P;ENSP00000413787;Q9Y6M1-5;Q9Y6M1-3;Q9Y6M1-4	Insulin-like growth factor 2 mRNA-binding protein 2	IGF2BP2	;ENSP00000371634_p.Y396N;ENSP00000371634_p.A393P;ENSP00000371634_p.Y396N;ENSP00000371634_p.A393P;;ENSP00000410242_p.Y402N;ENSP00000410242_p.A399P;ENSP00000410242_p.Y402N;ENSP00000410242_p.A399P;;;ENSP00000413787_p.Y333N;ENSP00000413787_p.A330P;ENSP00000413787_p.Y333N;ENSP00000413787_p.A330P;;;	Unspecific	8.34159	9.56439	4.06207	9.58965	0.000133389	+		Insulin-like Growth Factor-2 mRNA Binding Proteins (IGF2BPs/IMPs/VICKZs) bind RNA;Metabolism of RNA	31;31;31;31;31;31;31;31;31;31;23;23;23;23;23;23	31;31;31;31;31;31;31;31;31;31;23;23;23;23;23;23	0;0;0;0;0;0;0;0;0;0;0;0;0;0;0;0
9357	ENSP00000320291_p.S810P;ENSP00000320291;Q9BXW6;ENSP00000320291_p.V313I__5cf459;ENSP00000320291_p.V313I;ENSP00000320291_p.P314L;ENSP00000349545_p.S428P;ENSP00000349545;Q9BXW6-4;D3Z7I9;ENSP00000382370;E7ER58;J3KTA6;J3KSG6;ENSP00000462887;ENSP00000462477	ENSP00000320291_p.S810P;ENSP00000320291;Q9BXW6;ENSP00000320291_p.V313I__5cf459;ENSP00000320291_p.V313I;ENSP00000320291_p.P314L;ENSP00000349545_p.S428P;ENSP00000349545;Q9BXW6-4	Oxysterol-binding protein-related protein 1	OSBPL1A	ENSP00000320291_p.S810P;ENSP00000320291_p.P314L;ENSP00000320291_p.V313I;ENSP00000320291_p.V313I__5cf459;ENSP00000320291_p.S810P;;ENSP00000320291_p.V313I__5cf459;ENSP00000320291_p.V313I;ENSP00000320291_p.P314L;ENSP00000349545_p.S428P;ENSP00000349545_p.S428P;;;;;;;;	Ref	8.24052	9.46349	4.0626	9.48873	0.000133096	+		Adaptive Immune System;Bile acid and bile salt metabolism;Immune System;Metabolism;Metabolism of lipids;Metabolism of steroids;MHC class II antigen presentation;Synthesis of bile acids and bile salts	60;60;60;59;59;59;34;34;34;12;7;7;4;4;4;4	60;60;60;59;59;59;34;34;34;12;7;7;4;4;4;4	24;24;24;23;23;23;8;8;8;0;3;3;0;0;0;0
9603	ENSP00000498586;J3KNL2;ENSP00000324511;Q8WYJ6;ENSP00000498586_p.G80V;ENSP00000324511_p.G127V;A0A0U1RQA1;P42209;D3Z3V3;Q8WYJ6-2;A0A0U1RPA8;D3YVG1;I3L2M1;ENSP00000459780	ENSP00000498586;J3KNL2;ENSP00000324511;Q8WYJ6;ENSP00000498586_p.G80V;ENSP00000324511_p.G127V;A0A0U1RQA1;P42209;D3Z3V3	Septin-1	SEPT1;Sept1	ENSP00000498586_p.G80V;;ENSP00000324511_p.G127V;;ENSP00000498586_p.G80V;ENSP00000324511_p.G127V;;;;;;;;	Ref	9.11103	7.33084	-5.91366	9.11817	2.38782e-13	+	Bacterial invasion of epithelial cells		22;22;22;22;21;21;15;15;13;9;5;5;2;2	22;22;22;22;21;21;15;15;13;9;5;5;2;2	22;22;22;22;21;21;15;15;13;9;5;5;2;2
9635	ENSP00000325137;Q6JQN1;ENSP00000389813;Q6JQN1-5;Q6JQN1-2;F8W1I9;ENSP00000446959;Q6JQN1-4;Q6JQN1-3;ENSP00000446711;F8W179;F8W0Q4;ENSP00000447561;F8VXK4;ENSP00000449097;ENSP00000421527;D6RFF6	ENSP00000325137;Q6JQN1;ENSP00000389813;Q6JQN1-5;Q6JQN1-2;F8W1I9;ENSP00000446959	Acyl-CoA dehydrogenase family member 10	ACAD10		Unspecific	7.75178	8.81439	3.52992	8.85045	0.00109321	+		Fatty acid metabolism;Metabolism;Metabolism of lipids;Mitochondrial Fatty Acid Beta-Oxidation	48;48;47;47;36;30;30;16;16;8;8;7;7;6;6;4;4	48;48;47;47;36;30;30;16;16;8;8;7;7;6;6;4;4	42;42;41;41;33;28;28;16;13;8;8;7;7;4;4;4;4
9687	ENSP00000326010;ENSP00000382376;P29350;P29350-3;P29350-2;F5H0N8;ENSP00000438740;F5GY79;ENSP00000440114;F5H5H9;ENSP00000443393;F5H1Z8;ENSP00000445646;F5H1V7;ENSP00000446345;F5H4Z1;ENSP00000444805;F5GXD4;ENSP00000441044;U3KQS1;ENSP00000476175	ENSP00000326010;ENSP00000382376;P29350;P29350-3;P29350-2	Tyrosine-protein phosphatase non-receptor type 6	PTPN6		Unspecific	9.99266	8.32821	-5.5292	10.002	4.14524e-15	+	Adherens junction;B cell receptor signaling pathway;JAK-STAT signaling pathway;Leishmaniasis;Natural killer cell mediated cytotoxicity;Pathogenic Escherichia coli infection;PD-L1 expression and PD-1 checkpoint pathway in cancer;Proteoglycans in cancer;T cell receptor signaling pathway	Adaptive Immune System;Antigen activates B Cell Receptor (BCR) leading to generation of second messengers;CD22 mediated BCR regulation;Cell surface interactions at the vascular wall;Cell-Cell communication;Costimulation by the CD28 family;Cytokine Signaling in Immune system;GPVI-mediated activation cascade;Growth hormone receptor signaling;Hemostasis;Immune System;Innate Immune System;Interferon …	38;38;38;38;33;13;13;10;10;9;9;9;9;4;4;4;4;4;4;4;4	38;38;38;38;33;13;13;10;10;9;9;9;9;4;4;4;4;4;4;4;4	1;1;1;1;1;0;0;0;0;0;0;0;0;0;0;0;0;0;0;0;0
9770	ENSP00000327336;P21810	ENSP00000327336;P21810	Biglycan	BGN		Unspecific	9.19633	7.58555	-5.3509	9.20684	1.30466e-08	+		A tetrasaccharide linker sequence is required for GAG synthesis;Chondroitin sulfate biosynthesis;Chondroitin sulfate/dermatan sulfate metabolism;CS/DS degradation;Defective B3GALT6 causes EDSP2 and SEMDJL1;Defective B3GAT3 causes JDSSDHD;Defective B4GALT7 causes EDS, progeroid type;Defective CHST14 causes EDS, musculocontractural type;Defective CHST3 causes SEDCJD;Defective CHSY1 causes TPBS;Derm…	27;27	5;5	3;3
9893	ENSP00000329668;Q6S5L8;ENSP00000329668_p.A62P;ENSP00000329668_p.Q400H;F5H5M1;ENSP00000443300;ENSP00000379786;Q6S5L8-2;ENSP00000443300_p.Q114H;ENSP00000379786_p.Q157H;H0YLZ2;ENSP00000453397;H0YLU6;ENSP00000453344	ENSP00000329668;Q6S5L8;ENSP00000329668_p.A62P;ENSP00000329668_p.Q400H	SHC-transforming protein 4	SHC4	ENSP00000329668_p.A62P;ENSP00000329668_p.Q400H;;ENSP00000329668_p.A62P;ENSP00000329668_p.Q400H;;ENSP00000443300_p.Q114H;ENSP00000379786_p.Q157H;;ENSP00000443300_p.Q114H;ENSP00000379786_p.Q157H;;ENSP00000453397_p.Q114H;;ENSP00000453344_p.Q114H	Ref	6.09096	8.27217	7.24581	8.27502	8.54552e-07	+	Alcoholism;Bacterial invasion of epithelial cells;Breast cancer;Chemokine signaling pathway;Chronic myeloid leukemia;EGFR tyrosine kinase inhibitor resistance;Endocrine resistance;ErbB signaling pathway;Estrogen signaling pathway;Focal adhesion;Gastric cancer;Glioma;Growth hormone synthesis, secretion and action;Hepatocellular carcinoma;Insulin signaling pathway;MicroRNAs in cancer;Natural killer…		26;26;25;25;12;12;12;12;11;11;1;1;1;1	24;24;23;23;11;11;11;11;10;10;1;1;1;1	22;22;21;21;11;11;11;11;10;10;1;1;1;1
9905	ENSP00000378931;ENSP00000330032;Q16831;ENSP00000378931_p.H120Q;ENSP00000330032_p.H120Q;ENSP00000405209;C9J486;ENSP00000390118;C9JIP2;ENSP00000414963;B4DND0;ENSP00000405209_p.H120Q;ENSP00000390118_p.H120Q;ENSP00000414963_p.H120Q;F8WD51;ENSP00000396820_p.M83R;ENSP00000396820;ENSP00000387607;C9K0J2	ENSP00000378931;ENSP00000330032;Q16831;ENSP00000378931_p.H120Q;ENSP00000330032_p.H120Q;ENSP00000405209;C9J486;ENSP00000390118;C9JIP2;ENSP00000414963;B4DND0;ENSP00000405209_p.H120Q;ENSP00000390118_p.H120Q;ENSP00000414963_p.H120Q	Uridine phosphorylase 1	UPP1	ENSP00000378931_p.H120Q;ENSP00000330032_p.H120Q;;ENSP00000378931_p.H120Q;ENSP00000330032_p.H120Q;ENSP00000405209_p.H120Q;;ENSP00000390118_p.H120Q;;ENSP00000414963_p.H120Q;;ENSP00000405209_p.H120Q;ENSP00000390118_p.H120Q;ENSP00000414963_p.H120Q;;ENSP00000396820_p.M83R;ENSP00000396820_p.M83R;;	Ref	8.55672	9.63126	3.56954	9.66638	0.000209214	+	Drug metabolism - other enzymes;Metabolic pathways;Pyrimidine metabolism	Metabolism;Metabolism of nucleotides;Nucleobase catabolism;Nucleotide salvage;Pyrimidine catabolism;Pyrimidine salvage	23;23;23;22;22;13;13;13;13;13;13;12;12;12;6;6;6;2;2	23;23;23;22;22;13;13;13;13;13;13;12;12;12;6;6;6;2;2	21;21;21;20;20;13;13;13;13;13;13;12;12;12;6;6;6;2;2
10023	LRG_286p1_p.P595L;ENSP00000332371_p.P595L;ENSP00000391608;C9JBL3;ENSP00000470251;ENSP00000262895;Q16478	LRG_286p1_p.P595L;ENSP00000332371_p.P595L			LRG_286p1_p.P595L;ENSP00000332371_p.P595L;;;;;	Alt+Ref	8.33728	6.97234	-4.53423	8.35563	0.000747552	+	Glutamatergic synapse;Neuroactive ligand-receptor interaction;Protein digestion and absorption	Activation of Ca-permeable Kainate Receptor;Activation of kainate receptors upon glutamate binding;Anchoring fibril formation;Asparagine N-linked glycosylation;Assembly of collagen fibrils and other multimeric structures;Cargo concentration in the ER;Collagen biosynthesis and modifying enzymes;Collagen chain trimerization;Collagen degradation;Collagen formation;COPII-mediated vesicle transport;De…	76;76;2;2;1;1;1	76;76;2;2;1;1;1	1;1;0;0;0;0;0
10025	ENSP00000455329;ENSP00000386340;ENSP00000376315;ENSP00000332449;P50238;ENSP00000456068;ENSP00000455328;ENSP00000454458;K4DIB9;ENSP00000456357;H3BRQ4	ENSP00000455329;ENSP00000386340;ENSP00000376315;ENSP00000332449;P50238;ENSP00000456068;ENSP00000455328;ENSP00000454458;K4DIB9;ENSP00000456357;H3BRQ4	Cysteine-rich protein 1	CRIP1	ENSP00000455329_p.A58V;ENSP00000386340_p.A58V;ENSP00000376315_p.A58V;ENSP00000332449_p.A58V;;ENSP00000456068_p.A26V;ENSP00000455328_p.A26V;ENSP00000454458_p.A26V;;ENSP00000456357_p.A29V;	Alt+Ref	9.94125	9.08483	-2.84499	9.99784	2.51349e-05	+	African trypanosomiasis;Allograft rejection;alpha-Linolenic acid metabolism;Aminoacyl-tRNA biosynthesis;Amoebiasis;Antigen processing and presentation;Arachidonic acid metabolism;Arginine and proline metabolism;Asthma;Autoimmune thyroid disease;B cell receptor signaling pathway;beta-Alanine metabolism;Calcium signaling pathway;Cell adhesion molecules (CAMs);Chemical carcinogenesis;Cholesterol met…		8;8;8;8;8;5;5;5;5;5;5	8;8;8;8;8;5;5;5;5;5;5	2;2;2;2;2;2;2;2;2;2;2
10064	ENSP00000333266;P41226	ENSP00000333266;P41226	Ubiquitin-like modifier-activating enzyme 7	UBA7		Unspecific	9.09393	7.5269	-5.20555	9.10554	8.88503e-11	+	Parkinson disease;Ubiquitin mediated proteolysis	Adaptive Immune System;Antigen processing: Ubiquitination & Proteasome degradation;Antiviral mechanism by IFN-stimulated genes;Class I MHC mediated antigen processing & presentation;Cytokine Signaling in Immune system;DDX58/IFIH1-mediated induction of interferon-alpha/beta;DNA Damage Bypass;DNA Repair;Immune System;Innate Immune System;Interferon Signaling;ISG15 antiviral mechanism;Negative regul…	39;39	39;39	39;39
10118	ENSP00000334153_p.V421I;ENSP00000334153;Q14699;ENSP00000334153_p.E248K;G3XAJ6;ENSP00000403926_p.V385I;ENSP00000403926;ENSP00000403926_p.E212K;ENSP00000403997;C9JHG2;ENSP00000403997_p.E248K;ENSP00000409427;ENSP00000388718;C9JRN3;ENSP00000393216;C9JWQ9;F8WAR1;ENSP00000410493;U3KPZ2;ENSP00000475367_p.V36I;ENSP00000475367;M0QWQ1	ENSP00000334153_p.V421I;ENSP00000334153;Q14699;ENSP00000334153_p.E248K;G3XAJ6;ENSP00000403926_p.V385I;ENSP00000403926;ENSP00000403926_p.E212K;ENSP00000403997;C9JHG2;ENSP00000403997_p.E248K	Raftlin	RFTN1	ENSP00000334153_p.V421I;ENSP00000334153_p.E248K;ENSP00000334153_p.V421I;;ENSP00000334153_p.E248K;;ENSP00000403926_p.V385I;ENSP00000403926_p.E212K;ENSP00000403926_p.V385I;ENSP00000403926_p.E212K;ENSP00000403997_p.E248K;;ENSP00000403997_p.E248K;;;;;;;;;ENSP00000475367_p.V36I;ENSP00000475367_p.V36I;	Ref	9.19696	7.63798	-5.17882	9.20879	3.56222e-08	+			35;35;35;34;31;31;31;30;20;20;19;9;9;9;6;6;6;6;4;4;4;1	35;35;35;34;31;31;31;30;20;20;19;9;9;9;6;6;6;6;4;4;4;1	29;29;29;28;27;27;27;26;16;16;15;5;5;5;4;4;4;4;2;2;2;0
10273	ENSP00000337451;P29320;ENSP00000337451_p.W924R;ENSP00000337451_p.R914H;ENSP00000419190;C9JXA2;ENSP00000419190_p.R914H;Q8BRB1;B7ZNN5;P29319;ENSP00000399926;P29320-2;Q8C9K6;P29319-3;A0A338P6A7	ENSP00000337451;P29320;ENSP00000337451_p.W924R;ENSP00000337451_p.R914H;ENSP00000419190;C9JXA2;ENSP00000419190_p.R914H;Q8BRB1;B7ZNN5;P29319	Ephrin type-A receptor 3	EPHA3;Epha3	ENSP00000337451_p.R914H;ENSP00000337451_p.W924R;;ENSP00000337451_p.W924R;ENSP00000337451_p.R914H;ENSP00000419190_p.R914H;;ENSP00000419190_p.R914H;;;;;;;;	Ref	8.39442	7.06696	-4.40972	8.41438	5.41258e-05	+	Axon guidance	Axon guidance;Developmental Biology;EPHA-mediated growth cone collapse;EPH-ephrin mediated repulsion of cells;EPH-Ephrin signaling	29;29;28;27;25;25;24;23;22;22;13;13;9;8;3	28;28;27;26;24;24;23;22;21;21;13;13;9;8;3	25;25;24;23;21;21;20;19;18;18;13;13;9;8;3
10326	ENSP00000338185_p.R768W;ENSP00000338185;Q9NQ66;ENSP00000367908_p.R768W;ENSP00000367908;ENSP00000367904_p.R768W;ENSP00000367904;Q9NQ66-2;ENSP00000477664_p.R688W;ENSP00000477664;A0A087WT80;ENSP00000479997_p.R688W;ENSP00000479997;A0A087WW73;ENSP00000490862_p.R667W;ENSP00000490862;A0A1B0GWB6;ENSP00000431704_p.R508W;ENSP00000431704;H0YCJ2;ENSP00000486301_p.R667W;ENSP00000486301;A0A0D9SF51;ENSP00000487…	ENSP00000338185_p.R768W;ENSP00000338185;Q9NQ66;ENSP00000367908_p.R768W;ENSP00000367908;ENSP00000367904_p.R768W;ENSP00000367904;Q9NQ66-2;ENSP00000477664_p.R688W;ENSP00000477664;A0A087WT80;ENSP00000479997_p.R688W;ENSP00000479997;A0A087WW73;ENSP00000490862_p.R667W;ENSP00000490862;A0A1B0GWB6;ENSP00000431704_p.R508W;ENSP00000431704;H0YCJ2;ENSP00000486301_p.R667W;ENSP00000486301;A0A0D9SF51;ENSP00000487…	1-phosphatidylinositol 4,5-bisphosphate phosphodiesterase beta-1;Phosphoinositide phospholipase C	PLCB1	ENSP00000338185_p.R768W;ENSP00000338185_p.L284F;ENSP00000338185_p.R768W;;ENSP00000367908_p.R768W;ENSP00000367908_p.L284F;ENSP00000367908_p.R768W;ENSP00000367904_p.R768W;ENSP00000367904_p.L284F;ENSP00000367904_p.R768W;;ENSP00000477664_p.R688W;ENSP00000477664_p.L204F;ENSP00000477664_p.R688W;;ENSP00000479997_p.R688W;ENSP00000479997_p.L204F;ENSP00000479997_p.R688W;;ENSP00000490862_p.R667W;ENSP0000049…	Alt+Ref	8.39521	6.12727	-7.53395	8.39755	4.18202e-08	+	Adrenergic signaling in cardiomyocytes;African trypanosomiasis;AGE-RAGE signaling pathway in diabetic complications;Aldosterone synthesis and secretion;Alzheimer disease;Amoebiasis;Apelin signaling pathway;Calcium signaling pathway;Carbohydrate digestion and absorption;cGMP-PKG signaling pathway;Chagas disease (American trypanosomiasis);Chemokine signaling pathway;Cholinergic synapse;Circadian en…	Acetylcholine regulates insulin secretion;Activation of kainate receptors upon glutamate binding;Beta-catenin independent WNT signaling;Ca2+ pathway;Fatty Acids bound to GPR40 (FFAR1) regulate insulin secretion;Free fatty acids regulate insulin secretion;G alpha (i) signalling events;G alpha (q) signalling events;G beta:gamma signalling through PLC beta;GPCR downstream signalling;G-protein beta:g…	32;32;32;30;30;30;30;30;28;28;28;26;26;26;25;25;25;23;23;23;23;23;23;23;23;23;6;6;6;6;6;5;5;5;5;5;5;5;5;2;2;1;1;1;1;1;1	32;32;32;30;30;30;30;30;28;28;28;26;26;26;25;25;25;23;23;23;23;23;23;23;23;23;6;6;6;6;6;5;5;5;5;5;5;5;5;2;2;1;1;1;1;1;1	1;1;1;1;1;1;1;1;1;1;1;1;1;1;1;1;1;1;1;1;1;1;1;1;1;1;0;0;0;0;0;0;0;0;0;0;0;0;0;0;0;0;0;0;0;0;0
10329	ENSP00000468532;ENSP00000468238;ENSP00000466007;ENSP00000465709;ENSP00000338217;Q9HCE3;ENSP00000467903;K7EQN0;K7EQW7;ENSP00000468009;K7EIU3;ENSP00000464894;K7ELB7;ENSP00000466002;K7EP49;ENSP00000467229;K7EL14;ENSP00000465873;K7EPI7;ENSP00000467402;K7ES47;ENSP00000468551	ENSP00000468532;ENSP00000468238;ENSP00000466007;ENSP00000465709;ENSP00000338217;Q9HCE3	Zinc finger protein 532	ZNF532		Unspecific	8.15197	6.54492	-5.33851	8.16258	0.000856899	+			39;39;39;39;39;39;3;3;2;2;2;2;2;2;1;1;1;1;1;1;1;1	38;38;38;38;38;38;3;3;2;2;2;2;2;2;1;1;1;1;1;1;1;1	20;20;20;20;20;20;2;2;2;2;1;1;2;2;1;1;1;1;1;1;1;1
10350	ENSP00000385222;ENSP00000338475;Q9HAC7-4;Q9HAC7;ENSP00000486291;Q9HAC7-3;Q9HAC7-2;ENSP00000393032_p.V377I;ENSP00000393032;H0Y4N1;ENSP00000395000;H7C0H3	ENSP00000385222;ENSP00000338475;Q9HAC7-4;Q9HAC7;ENSP00000486291;Q9HAC7-3;Q9HAC7-2;ENSP00000393032_p.V377I;ENSP00000393032;H0Y4N1	Succinate--hydroxymethylglutarate CoA-transferase	SUGCT	;;;;;;;ENSP00000393032_p.V377I;ENSP00000393032_p.V377I;;;	Unspecific	6.37597	8.37162	6.62943	8.37599	2.60596e-05	+			13;13;13;13;12;12;11;10;10;10;5;5	13;13;13;13;12;12;11;10;10;10;5;5	10;10;10;10;9;9;8;7;7;7;3;3
10394	ENSP00000497185;ENSP00000463188;ENSP00000338989;O95361;ENSP00000399918;B3KP96;ENSP00000462903;O95361-2	ENSP00000497185;ENSP00000463188;ENSP00000338989;O95361;ENSP00000399918;B3KP96;ENSP00000462903;O95361-2	Tripartite motif-containing protein 16	TRIM16	ENSP00000497185_p.G549R;ENSP00000463188_p.G549R;ENSP00000338989_p.G549R;;ENSP00000399918_p.G419R;;ENSP00000462903_p.G333R;	Alt+Ref	8.24051	6.30006	-6.44604	8.24547	6.32289e-05	+			30;30;30;30;20;20;17;17	30;30;30;30;20;20;17;17	0;0;0;0;0;0;0;0
10450	ENSP00000339826_p.V198G;ENSP00000339826_p.K638R;ENSP00000339826;Q6ZUJ8;ENSP00000339826_p.A83S;ENSP00000360151_p.V20G;ENSP00000360151_p.K460R;ENSP00000360151;Q6ZUJ8-2;ENSP00000360150_p.K237R;ENSP00000360150;Q6ZUJ8-3	ENSP00000339826_p.V198G;ENSP00000339826_p.K638R;ENSP00000339826;Q6ZUJ8;ENSP00000339826_p.A83S;ENSP00000360151_p.V20G;ENSP00000360151_p.K460R;ENSP00000360151;Q6ZUJ8-2;ENSP00000360150_p.K237R;ENSP00000360150;Q6ZUJ8-3	Phosphoinositide 3-kinase adapter protein 1	PIK3AP1	ENSP00000339826_p.V198G;ENSP00000339826_p.K638R;ENSP00000339826_p.A83S;ENSP00000339826_p.K638R;ENSP00000339826_p.V198G;;ENSP00000339826_p.A83S;ENSP00000360151_p.V20G;ENSP00000360151_p.K460R;ENSP00000360151_p.K460R;ENSP00000360151_p.V20G;;ENSP00000360150_p.K237R;ENSP00000360150_p.K237R;	Ref	8.53159	7.42234	-3.68485	8.56412	0.00109002	+	B cell receptor signaling pathway;PI3K-Akt signaling pathway	Adaptive Immune System;Antigen activates B Cell Receptor (BCR) leading to generation of second messengers;Constitutive Signaling by Aberrant PI3K in Cancer;Disease;Diseases of signal transduction;Immune System;Intracellular signaling by second messengers;Negative regulation of the PI3K/AKT network;PI3K/AKT Signaling in Cancer;PI5P, PP2A and IER3 Regulate PI3K/AKT Signaling;PIP3 activates AKT sign…	30;30;30;30;29;28;28;28;28;19;19;19	30;30;30;30;29;28;28;28;28;19;19;19	16;16;16;16;15;14;14;14;14;10;10;10
10468	ENSP00000419188_p.P169Q;ENSP00000419188_p.D217Y;ENSP00000419188;ENSP00000412376_p.P169Q;ENSP00000412376_p.D217Y;ENSP00000412376;ENSP00000407112_p.P169Q;ENSP00000407112_p.D217Y;ENSP00000407112;ENSP00000392775_p.P169Q;ENSP00000392775_p.D217Y;ENSP00000392775;ENSP00000340093_p.P169Q;ENSP00000340093_p.D217Y;ENSP00000340093;Q6IQ20;ENSP00000404391;C9JGB1;ENSP00000395138;H0Y4Y2	ENSP00000419188_p.P169Q;ENSP00000419188_p.D217Y;ENSP00000419188;ENSP00000412376_p.P169Q;ENSP00000412376_p.D217Y;ENSP00000412376;ENSP00000407112_p.P169Q;ENSP00000407112_p.D217Y;ENSP00000407112;ENSP00000392775_p.P169Q;ENSP00000392775_p.D217Y;ENSP00000392775;ENSP00000340093_p.P169Q;ENSP00000340093_p.D217Y;ENSP00000340093;Q6IQ20	N-acyl-phosphatidylethanolamine-hydrolyzing phospholipase D	NAPEPLD	ENSP00000419188_p.P169Q;ENSP00000419188_p.D217Y;ENSP00000419188_p.D217Y;ENSP00000419188_p.P169Q;ENSP00000412376_p.P169Q;ENSP00000412376_p.D217Y;ENSP00000412376_p.D217Y;ENSP00000412376_p.P169Q;ENSP00000407112_p.P169Q;ENSP00000407112_p.D217Y;ENSP00000407112_p.D217Y;ENSP00000407112_p.P169Q;ENSP00000392775_p.P169Q;ENSP00000392775_p.D217Y;ENSP00000392775_p.D217Y;ENSP00000392775_p.P169Q;ENSP00000340093…	Unspecific	6.35495	8.02792	5.55749	8.03705	0.000391192	+	Retrograde endocannabinoid signaling	Biosynthesis of A2E, implicated in retinal degradation;Disease;Diseases associated with visual transduction;Diseases of signal transduction;G alpha (i) signalling events;GPCR downstream signalling;Retinoid cycle disease events;Signal Transduction;Signaling by GPCR;The canonical retinoid cycle in rods (twilight vision);Visual phototransduction	12;12;12;12;12;12;12;12;12;12;12;12;12;12;12;12;5;5;5;5	12;12;12;12;12;12;12;12;12;12;12;12;12;12;12;12;5;5;5;5	7;7;7;7;7;7;7;7;7;7;7;7;7;7;7;7;4;4;3;3
10532	ENSP00000341083;P20594;P20594-2;Q6VVW5;B1AWI7;F6YT88;ENSP00000399204;H7C1A1;Q6VVW5-3;H7C056;ENSP00000393029;A0A0U1RPB5;ENSP00000261170_p.F281L;ENSP00000261170_p.E811K;ENSP00000261170;ENSP00000254854_p.W21R;ENSP00000254854_p.P701S;ENSP00000254854_p.P37Q;ENSP00000254854_p.A52S;ENSP00000254854;F6VFS9;A0A0U1RPR8;O75343;Q3UWA6-2;Q3UWA6;P25092;Q02846	ENSP00000341083;P20594;P20594-2;Q6VVW5;B1AWI7;F6YT88	Atrial natriuretic peptide receptor 2;Guanylate cyclase	NPR2;Npr2	;;;;;;;;;;;;ENSP00000261170_p.F281L;ENSP00000261170_p.E811K;ENSP00000261170_p.F281L;ENSP00000261170_p.E811K;ENSP00000254854_p.W21R;ENSP00000254854_p.P701S;ENSP00000254854_p.P37Q;ENSP00000254854_p.A52S;ENSP00000254854_p.P37Q;ENSP00000254854_p.W21R;ENSP00000254854_p.P701S;ENSP00000254854_p.A52S;;;;;;;	Unspecific	7.61742	8.82937	4.02599	8.85524	0.000172238	+	cGMP-PKG signaling pathway;Metabolic pathways;Olfactory transduction;Oxytocin signaling pathway;Phototransduction;Purine metabolism;Vascular smooth muscle contraction	Cardiac conduction;Digestion;Digestion and absorption;Disease;G alpha (i) signalling events;GPCR downstream signalling;Inactivation, recovery and regulation of the phototransduction cascade;Infectious disease;Intestinal infectious diseases;Muscle contraction;Physiological factors;Signal Transduction;Signaling by GPCR;The phototransduction cascade;Uptake and actions of bacterial toxins;Visual phot…	34;34;30;29;26;22;9;9;7;6;6;1;1;1;1;1;1;1;1;1;1;1;1;1;1;1;1	34;34;30;29;26;22;9;9;7;6;6;1;1;1;1;1;1;1;1;1;1;1;1;1;1;1;1	7;7;7;3;3;3;1;1;0;1;1;0;0;0;0;0;0;0;0;0;0;0;0;0;0;0;0
10558	ENSP00000402581;ENSP00000341539;Q8N3R3;Q8N3R3-4;ENSP00000489162;ENSP00000402604;ENSP00000392032;ENSP00000387842;A0A0U1RQT4;Q8N3R3-2	ENSP00000402581;ENSP00000341539;Q8N3R3;Q8N3R3-4	T-cell activation inhibitor, mitochondrial	TCAIM		Unspecific	5.52285	7.36305	6.11299	7.36928	0.000303253	+			9;9;9;8;1;1;1;1;1;1	9;9;9;8;1;1;1;1;1;1	8;8;8;7;1;1;1;1;1;1
10595	ENSP00000341905;Q86YV0;Q86YV0-2;ENSP00000468841;M0QX12;V9GYD1;ENSP00000476634	ENSP00000341905;Q86YV0;Q86YV0-2;ENSP00000468841;M0QX12	RAS protein activator like-3	RASAL3		Unspecific	8.92692	6.36388	-8.51423	8.92811	2.42243e-18	+	Ras signaling pathway	Cytokine Signaling in Immune system;FLT3 Signaling;Immune System;MAPK family signaling cascades;MAPK1/MAPK3 signaling;RAF/MAP kinase cascade;Regulation of RAS by GAPs;Signal Transduction	57;57;52;29;29;21;21	56;56;51;28;28;21;21	44;44;39;23;23;18;18
10607	ENSP00000435105_p.L26V;ENSP00000434217_p.L26V;ENSP00000433215_p.L26V;ENSP00000432244_p.L26V;ENSP00000409917_p.L26V;ENSP00000345672_p.L26V;ENSP00000342070_p.L26V;ENSP00000431518_p.L26V;ENSP00000436122_p.L26V;ENSP00000434725_p.L26V;ENSP00000436627_p.L26V;ENSP00000435074_p.L26V;ENSP00000433995_p.L26V;ENSP00000436159_p.L26V;ENSP00000436074_p.L26V;ENSP00000435650_p.L26V;ENSP00000436456_p.L26V;ENSP0000…	ENSP00000435105_p.L26V;ENSP00000434217_p.L26V;ENSP00000433215_p.L26V;ENSP00000432244_p.L26V;ENSP00000409917_p.L26V;ENSP00000345672_p.L26V;ENSP00000342070_p.L26V			ENSP00000435105_p.L26V;ENSP00000434217_p.L26V;ENSP00000433215_p.L26V;ENSP00000432244_p.L26V;ENSP00000409917_p.L26V;ENSP00000345672_p.L26V;ENSP00000342070_p.L26V;ENSP00000431518_p.L26V;ENSP00000436122_p.L26V;ENSP00000434725_p.L26V;ENSP00000436627_p.L26V;ENSP00000435074_p.L26V;ENSP00000433995_p.L26V;ENSP00000436159_p.L26V;ENSP00000436074_p.L26V;ENSP00000435650_p.L26V;ENSP00000436456_p.L26V;ENSP0000…	Alt+Ref	8.95	9.94241	3.29672	9.9845	0.000407837	+			22;22;22;22;22;22;22;10;10;10;10;10;10;10;8;8;8;7;4;4;4;4	22;22;22;22;22;22;22;10;10;10;10;10;10;10;8;8;8;7;4;4;4;4	4;4;4;4;4;4;4;4;4;4;4;4;4;4;4;4;4;4;4;4;4;4
10613	ENSP00000342137;Q6ZVX7;A0A0A0MQ97;G3X9C2	ENSP00000342137;Q6ZVX7	F-box only protein 50	NCCRP1		Unspecific	6.95854	8.62408	5.53281	8.63336	9.52575e-06	+			9;9;3;3	9;9;3;3	9;9;3;3
10635	ENSP00000342481;O75110;O75110-2;ENSP00000309086;A0A0A0MR22	ENSP00000342481;O75110;O75110-2;ENSP00000309086;A0A0A0MR22	Probable phospholipid-transporting ATPase IIA	ATP9A		Unspecific	7.72156	9.01169	4.28573	9.0334	6.39004e-05	+		Ion channel transport;Ion transport by P-type ATPases;Transport of small molecules	38;38;31;30;30	38;38;31;30;30	5;5;4;3;3
10782	ENSP00000344672_p.P1285A	ENSP00000344672_p.P1285A			ENSP00000344672_p.P1285A	Alt+Ref	6.21016	8.62563	8.02403	8.6273	6.01127e-11	+			50	50	0
10791	ENSP00000392767;ENSP00000376399;ENSP00000376398;ENSP00000344822;Q99584	ENSP00000392767;ENSP00000376399;ENSP00000376398;ENSP00000344822;Q99584	Protein S100-A13	S100A13		Unspecific	9.16279	10.0679	3.0067	10.1188	0.00138954	+			11;11;11;11;11	11;11;11;11;11	9;9;9;9;9
10885	ENSP00000357705;ENSP00000357704;ENSP00000357703;ENSP00000346294;P26447	ENSP00000357705;ENSP00000357704;ENSP00000357703;ENSP00000346294;P26447	Protein S100-A4	S100A4		Unspecific	10.6134	9.40931	-3.99996	10.6397	2.26766e-09	+			12;12;12;12;12	12;12;12;12;12	6;6;6;6;6
11008	ENSP00000347872;Q99536;ENSP00000465946;Q99536-3;ENSP00000408553;Q99536-2;K7ERT7;ENSP00000468401;K7ESA3;ENSP00000468621;K7ENX2;ENSP00000467131;K7EM19;ENSP00000466322;ENSP00000465239;K7EJM4	ENSP00000347872;Q99536;ENSP00000465946;Q99536-3;ENSP00000408553;Q99536-2	Synaptic vesicle membrane protein VAT-1 homolog	VAT1		Unspecific	9.77774	10.4733	2.31077	10.5531	0.00114214	+		Immune System;Innate Immune System;Neutrophil degranulation	34;34;25;25;19;19;15;15;11;11;8;8;8;8;2;2	34;34;25;25;19;19;15;15;11;11;8;8;8;8;2;2	23;23;15;15;11;11;12;12;7;7;4;4;4;4;1;1
11048	ENSP00000382941_p.L44S__6f15d0;ENSP00000382941_p.L44S;ENSP00000382941_p.G75A;ENSP00000382941;ENSP00000351621_p.L44S__6f15d0;ENSP00000351621_p.L44S;ENSP00000351621_p.G75A;ENSP00000351621;ENSP00000348307_p.L44S__6f15d0;ENSP00000348307_p.L44S;ENSP00000348307_p.G75A;ENSP00000348307;P78324;ENSP00000382941_p.A57V;ENSP00000351621_p.A57V;ENSP00000348307_p.A57V;P78324-4;ENSP00000456826_p.T51I;ENSP00000456…	ENSP00000382941_p.L44S__6f15d0;ENSP00000382941_p.L44S;ENSP00000382941_p.G75A;ENSP00000382941;ENSP00000351621_p.L44S__6f15d0;ENSP00000351621_p.L44S;ENSP00000351621_p.G75A;ENSP00000351621;ENSP00000348307_p.L44S__6f15d0;ENSP00000348307_p.L44S;ENSP00000348307_p.G75A;ENSP00000348307;P78324;ENSP00000382941_p.A57V;ENSP00000351621_p.A57V;ENSP00000348307_p.A57V;P78324-4;ENSP00000456826_p.T51I;ENSP00000456…	Tyrosine-protein phosphatase non-receptor type substrate 1;Signal-regulatory protein beta-1 isoform 3	SIRPA;SIRPB1	ENSP00000382941_p.L44S__6f15d0;ENSP00000382941_p.L44S;ENSP00000382941_p.G75A;ENSP00000382941_p.A57V;ENSP00000382941_p.G75A;ENSP00000382941_p.L44S;ENSP00000382941_p.L44S__6f15d0;ENSP00000351621_p.L44S__6f15d0;ENSP00000351621_p.L44S;ENSP00000351621_p.G75A;ENSP00000351621_p.A57V;ENSP00000351621_p.G75A;ENSP00000351621_p.L44S;ENSP00000351621_p.L44S__6f15d0;ENSP00000348307_p.L44S__6f15d0;ENSP0000034830…	Alt+Ref	6.53926	8.61865	6.90757	8.62225	2.20305e-08	+	Osteoclast differentiation	Cell surface interactions at the vascular wall;Cell-Cell communication;DAP12 interactions;Hemostasis;Immune System;Innate Immune System;Neutrophil degranulation;Signal regulatory protein family interactions	18;18;18;18;18;18;18;18;18;18;18;18;18;17;17;17;17;9;9;9;9;9;9;9;9;9;9;9;3;3;3;3;3;3;3;3;3;3;3;3;3;3;3;3	18;18;18;18;18;18;18;18;18;18;18;18;18;17;17;17;17;9;9;9;9;9;9;9;9;9;9;9;3;3;3;3;3;3;3;3;3;3;3;3;3;3;3;3	1;1;1;1;1;1;1;1;1;1;1;1;1;1;1;1;1;0;0;0;0;0;0;0;0;0;0;0;0;0;0;0;0;0;0;0;0;0;0;0;0;0;0;0
11197	ENSP00000418037_p.(P182_L200)del;ENSP00000349770_p.(P182_L200)del;ENSP00000418037;ENSP00000349770;Q13568-3;Q13568-2	ENSP00000418037_p.(P182_L200)del;ENSP00000349770_p.(P182_L200)del;ENSP00000418037;ENSP00000349770;Q13568-3;Q13568-2	Interferon regulatory factor 5	IRF5	ENSP00000418037_p.(P182_L200)del;ENSP00000349770_p.(P182_L200)del;ENSP00000418037_p.(P182_L200)del;ENSP00000349770_p.(P182_L200)del;;	Unspecific	8.34815	6.97785	-4.55204	8.36628	0.000714236	+	Toll-like receptor signaling pathway	Cytokine Signaling in Immune system;Immune System;Interferon alpha/beta signaling;Interferon gamma signaling;Interferon Signaling	16;16;16;16;16;16	16;16;16;16;16;16	1;1;1;1;1;1
11214	ENSP00000349896;LRG_134p1;ENSP00000498466;P25445-6;P25445;K9J972;ENSP00000347979;ENSP00000347426;H7C5Z8;ENSP00000345601;ENSP00000477997;A0A087WTM9;P25445-7;ENSP00000422453;ENSP00000425159;ENSP00000423755;P25445-5;P25445-4	ENSP00000349896;LRG_134p1;ENSP00000498466;P25445-6;P25445	Tumor necrosis factor receptor superfamily member 6	FAS		Unspecific	8.93523	8.02256	-3.03182	8.98533	0.00097563	+	African trypanosomiasis;Allograft rejection;alpha-Linolenic acid metabolism;Alzheimer disease;Aminoacyl-tRNA biosynthesis;Amoebiasis;Antigen processing and presentation;Apoptosis;Arachidonic acid metabolism;Arginine and proline metabolism;Asthma;Autoimmune thyroid disease;B cell receptor signaling pathway;beta-Alanine metabolism;Calcium signaling pathway;Cell adhesion molecules (CAMs);Chagas dise…	Apoptosis;CASP8 activity is inhibited;Caspase activation via Death Receptors in the presence of ligand;Caspase activation via extrinsic apoptotic signalling pathway;Death Receptor Signalling;Dimerization of procaspase-8;FasL/ CD95L signaling;Gene expression (Transcription);Generic Transcription Pathway;Programmed Cell Death;Regulated Necrosis;Regulation by c-FLIP;Regulation of necroptotic cell de…	14;14;14;14;14;3;3;3;3;3;3;3;3;2;2;2;2;2	14;14;14;14;14;3;3;3;3;3;3;3;3;2;2;2;2;2	14;14;14;14;14;3;3;3;3;3;3;3;3;2;2;2;2;2
11301	ENSP00000350961_p.P28T	ENSP00000350961_p.P28T			ENSP00000350961_p.P28T	Alt+Ref	7.39436	8.77977	4.60223	8.7973	1.51009e-05	+			4	4	2
11317	LRG_360p2;ENSP00000413675;LRG_360p1;ENSP00000351155;Q8WXF7-2;Q8WXF7;G3V5T4;ENSP00000452506;A0A1Y7VLD6;G3V321;ENSP00000450989;H0YJ65;ENSP00000450897;G3V4Y8;ENSP00000452074	LRG_360p2;ENSP00000413675;LRG_360p1;ENSP00000351155;Q8WXF7-2;Q8WXF7	Atlastin-1	ATL1		Unspecific	6.62044	8.24754	5.40513	8.25767	0.000276274	+			26;26;26;26;26;26;8;8;4;2;2;2;2;1;1	25;25;25;25;25;25;8;8;4;2;2;2;2;1;1	9;9;9;9;9;9;4;4;0;0;0;0;0;0;0
11331	ENSP00000351314;P40306;J3QQN1;ENSP00000463811;ENSP00000463376;J3QL48	ENSP00000351314;P40306	Proteasome subunit beta type-10	PSMB10		Unspecific	8.83342	7.60305	-4.08722	8.85825	2.87909e-05	+	Proteasome	ABC transporter disorders;ABC-family proteins mediated transport;Activation of APC/C and APC/C:Cdc20 mediated degradation of mitotic proteins;Activation of NF-kappaB in B cells;Adaptive Immune System;Antigen processing: Ubiquitination & Proteasome degradation;Antigen processing-Cross presentation;APC/C:Cdc20 mediated degradation of mitotic proteins;APC/C:Cdc20 mediated degradation of Securin;APC/…	12;12;4;4;1;1	8;8;4;4;1;1	8;8;4;4;1;1
11400	ENSP00000489282;ENSP00000484841;ENSP00000484658;ENSP00000484638;ENSP00000484095;ENSP00000483283;ENSP00000482271;ENSP00000480826;ENSP00000366999;ENSP00000358160;ENSP00000352252;P68433;P68431	ENSP00000489282;ENSP00000484841;ENSP00000484658;ENSP00000484638;ENSP00000484095;ENSP00000483283;ENSP00000482271;ENSP00000480826;ENSP00000366999;ENSP00000358160;ENSP00000352252;P68433;P68431	Histone H3.1	Hist1h3a;HIST1H3A	;;;ENSP00000484638_p.E106K;;;;;;;;;	Alt+Ref	9.03645	8.26719	-2.55542	9.10468	0.0008376	+	Alcoholism;Shigellosis;Systemic lupus erythematosus;Transcriptional misregulation in cancer	Activated PKN1 stimulates transcription of AR (androgen receptor) regulated genes KLK2 and KLK3;Activation of anterior HOX genes in hindbrain development during early embryogenesis;Activation of HOX genes during differentiation;Amyloid fiber formation;B-WICH complex positively regulates rRNA expression;Cell Cycle;Cell Cycle, Mitotic;Cellular responses to external stimuli;Cellular responses to str…	21;21;21;21;21;21;21;21;21;21;21;21;21	1;1;1;1;1;1;1;1;1;1;1;1;1	1;1;1;1;1;1;1;1;1;1;1;1;1
11473	ENSP00000353099_p.R42T;ENSP00000353099;ENSP00000353099_p.42_43insS;P01911;ENSP00000353099_p.A100T;ENSP00000353099_p.V114A;ENSP00000353099_p.Y61H;REV__ENSP00000430371;REV__E5RFL3	ENSP00000353099_p.R42T;ENSP00000353099;ENSP00000353099_p.42_43insS;P01911;ENSP00000353099_p.A100T;ENSP00000353099_p.V114A;ENSP00000353099_p.Y61H	HLA class II histocompatibility antigen, DRB1-15 beta chain	HLA-DRB1	ENSP00000353099_p.R42T;ENSP00000353099_p.A100T;ENSP00000353099_p.Q99GfsX26;ENSP00000353099_p.R101SfsX27;ENSP00000353099_p.S66Y;ENSP00000353099_p.V114A;ENSP00000353099_p.Y61H;ENSP00000353099_p.42_43insS;ENSP00000353099_p.R42T;ENSP00000353099_p.42_43insS;;ENSP00000353099_p.A100T;ENSP00000353099_p.V114A;ENSP00000353099_p.Y61H;;	Alt+Ref	9.40928	6.7887	-8.70539	9.41032	5.47563e-25	+	Allograft rejection;Antigen processing and presentation;Asthma;Autoimmune thyroid disease;Cell adhesion molecules (CAMs);Epstein-Barr virus infection;Graft-versus-host disease;Hematopoietic cell lineage;Herpes simplex virus 1 infection;Human T-cell leukemia virus 1 infection;Inflammatory bowel disease (IBD);Influenza A;Intestinal immune network for IgA production;Leishmaniasis;Phagosome;Rheumatoi…	Adaptive Immune System;Costimulation by the CD28 family;Cytokine Signaling in Immune system;Downstream TCR signaling;Generation of second messenger molecules;Immune System;Interferon gamma signaling;Interferon Signaling;MHC class II antigen presentation;PD-1 signaling;Phosphorylation of CD3 and TCR zeta chains;TCR signaling;Translocation of ZAP-70 to Immunological synapse	13;13;13;13;12;11;10;1;1	12;12;12;12;11;10;9;1;1	0;0;0;0;0;0;0;0;0
11506	ENSP00000353375;P27816;ENSP00000379083;P27816-6;ENSP00000353375_p.S427Y;ENSP00000379083_p.S427Y	ENSP00000353375;P27816;ENSP00000379083;P27816-6;ENSP00000353375_p.S427Y;ENSP00000379083_p.S427Y	Microtubule-associated protein 4	MAP4	ENSP00000353375_p.S427Y;ENSP00000353375_p.V628I;;ENSP00000379083_p.S427Y;ENSP00000379083_p.V628I;;ENSP00000353375_p.S427Y;ENSP00000379083_p.S427Y	Alt+Ref	6.82834	8.6199	5.95143	8.62686	1.72523e-06	+			128;128;127;127;126;125	6;6;6;6;6;6	0;0;0;0;0;0
11518	ENSP00000392164_p.G987R;ENSP00000353508_p.G991R;ENSP00000392164_p.P249R;ENSP00000392164;ENSP00000353508_p.P253R;ENSP00000353508;P11137-3;P11137;ENSP00000392164_p.R419K;ENSP00000353508_p.R423K;ENSP00000376032;ENSP00000355290;P11137-2;Q80X35;Q80ZL4;G3UZK9	ENSP00000392164_p.G987R;ENSP00000353508_p.G991R;ENSP00000392164_p.P249R;ENSP00000392164;ENSP00000353508_p.P253R;ENSP00000353508;P11137-3;P11137;ENSP00000392164_p.R419K;ENSP00000353508_p.R423K	Microtubule-associated protein 2	MAP2	ENSP00000392164_p.G987R;ENSP00000353508_p.G991R;ENSP00000392164_p.P249R;ENSP00000392164_p.P1592S;ENSP00000392164_p.R419K;ENSP00000392164_p.P249R;ENSP00000392164_p.G987R;ENSP00000353508_p.P253R;ENSP00000353508_p.P1596S;ENSP00000353508_p.R423K;ENSP00000353508_p.P253R;ENSP00000353508_p.G991R;;;ENSP00000392164_p.R419K;ENSP00000353508_p.R423K;ENSP00000376032_p.P240S;ENSP00000355290_p.P240S;;;;	Alt+Ref	7.61762	8.85502	4.11054	8.87946	0.000122874	+			74;74;73;73;73;73;73;73;72;72;29;29;29;16;16;2	74;74;73;73;73;73;73;73;72;72;29;29;29;16;16;2	1;1;0;0;0;0;0;0;0;0;0;0;0;0;0;0
11553	ENSP00000353846;O15075;ENSP00000369223;O15075-4	ENSP00000353846;O15075	Serine/threonine-protein kinase DCLK1	DCLK1		Unspecific	8.39647	9.79469	4.64479	9.81172	8.13884e-07	+			53;53;22;22	53;53;22;22	2;2;2;2
11620	LRG_91p1;ENSP00000354532;P00491;G3V5M2;ENSP00000452421;G3V2H3;ENSP00000450663;G3V393;ENSP00000451108	LRG_91p1;ENSP00000354532;P00491;G3V5M2;ENSP00000452421	Purine nucleoside phosphorylase	PNP	LRG_91p1_p.G51S;ENSP00000354532_p.G51S;;;ENSP00000452421_p.G90S;;ENSP00000450663_p.G51S;;	Alt+Ref	8.921	7.76358	-3.84487	8.95022	4.0615e-05	+	Metabolic pathways;Nicotinate and nicotinamide metabolism;Purine metabolism;Pyrimidine metabolism	Immune System;Innate Immune System;Metabolism;Metabolism of nucleotides;Neutrophil degranulation;Nucleobase catabolism;Nucleotide salvage;Purine catabolism;Purine salvage	22;22;22;14;14;8;8;3;3	1;1;1;1;1;1;1;0;0	1;1;1;1;1;1;1;0;0
11647	ENSP00000354677;Q96SL4;V9GXV4	ENSP00000354677;Q96SL4	Glutathione peroxidase 7	GPX7		Unspecific	9.40798	8.83401	-1.90668	9.51065	0.00117879	+	Amyotrophic lateral sclerosis (ALS);Arachidonic acid metabolism;Glutathione metabolism;Huntington disease;Metabolic pathways;Thyroid hormone synthesis	Cellular responses to external stimuli;Cellular responses to stress;Detoxification of Reactive Oxygen Species	15;15;1	9;9;0	9;9;0
11688	ENSP00000424231;ENSP00000354911;Q96CG3	ENSP00000424231;ENSP00000354911;Q96CG3	TRAF-interacting protein with FHA domain-containing protein A	TIFA		Unspecific	8.21461	5.76038	-8.15275	8.21613	4.96111e-07	+	Shigellosis	Alpha-protein kinase 1 signaling pathway;Immune System;Innate Immune System	9;9;9	9;9;9	9;9;9
11699	ENSP00000354960;Q8IYK4;ENSP00000497601;A0A3B3IT37;Q5SXQ3;ENSP00000356490;Q5SXQ5;ENSP00000356491;Q6NVG7;D6RCH2	ENSP00000354960;Q8IYK4;ENSP00000497601;A0A3B3IT37;Q5SXQ3;ENSP00000356490	Procollagen galactosyltransferase 2	COLGALT2		Unspecific	7.09987	8.88537	5.93131	8.89243	1.66804e-08	+	Lysine degradation;Metabolic pathways;Other types of O-glycan biosynthesis	Collagen biosynthesis and modifying enzymes;Collagen formation;Extracellular matrix organization	22;22;19;19;14;14;10;10;9;7	22;22;19;19;14;14;10;10;9;7	22;22;19;19;14;14;10;10;9;7
11723	ENSP00000431586;ENSP00000355133;O75052-3;O75052;Q9D3A8;ENSP00000396713;E9PSG0;E0CYH9;Q9D3A8-2;ENSP00000434988;O75052-2	ENSP00000431586;ENSP00000355133;O75052-3;O75052;Q9D3A8;ENSP00000396713;E9PSG0;E0CYH9;Q9D3A8-2	Carboxyl-terminal PDZ ligand of neuronal nitric oxide synthase protein	NOS1AP;Nos1ap		Unspecific	6.0828	8.08652	6.6562	8.09081	2.07092e-05	+	Circadian entrainment		9;9;9;9;8;6;6;5;5;3;3	9;9;9;9;8;6;6;5;5;3;3	8;8;8;8;7;6;6;5;5;2;2
11757	ENSP00000355377_p.V138M;ENSP00000355377_p.T323A;ENSP00000355377_p.N215D;ENSP00000355377;O95154	ENSP00000355377_p.V138M;ENSP00000355377_p.T323A;ENSP00000355377_p.N215D;ENSP00000355377;O95154	Aflatoxin B1 aldehyde reductase member 3	AKR7A3	ENSP00000355377_p.V138M;ENSP00000355377_p.T323A;ENSP00000355377_p.N215D;ENSP00000355377_p.T323A;ENSP00000355377_p.N215D;ENSP00000355377_p.V138M;	Unspecific	6.65426	8.73326	6.9063	8.73687	1.60101e-07	+	Metabolism of xenobiotics by cytochrome P450	Aflatoxin activation and detoxification;Biological oxidations;Metabolism	12;12;12;12;12	11;11;11;11;11	7;7;7;7;7
11763	ENSP00000355421;Q6NT46;ENSP00000286049;Q96GT9	ENSP00000355421;Q6NT46	G antigen 2A	GAGE2A		Unspecific	7.90723	10.162	7.49016	10.1644	3.62986e-17	+			7;7;1;1	1;1;0;0	1;1;0;0
11774	ENSP00000355501_p.S854T;ENSP00000355501_p.P997T;ENSP00000355501;Q5SW79-2;ENSP00000355501_p.T640I;ENSP00000355501_p.G1211C;ENSP00000355501_p.A493S;ENSP00000355501_p.W347C;ENSP00000355501_p.P833Q;ENSP00000355501_p.W1326L;ENSP00000355501_p.G325V;ENSP00000427944;E5RFU8;ENSP00000428183;E5RJT5;ENSP00000428996;H0YB92;ENSP00000428996_p.A119S;ENSP00000428400;E5RIH6	ENSP00000355501_p.S854T;ENSP00000355501_p.P997T;ENSP00000355501;Q5SW79-2;ENSP00000355501_p.T640I;ENSP00000355501_p.G1211C;ENSP00000355501_p.A493S;ENSP00000355501_p.W347C;ENSP00000355501_p.P833Q;ENSP00000355501_p.W1326L;ENSP00000355501_p.G325V	Centrosomal protein of 170 kDa	CEP170	ENSP00000355501_p.S854T;ENSP00000355501_p.P997T;ENSP00000355501_p.A493S;ENSP00000355501_p.G1211C;ENSP00000355501_p.G325V;ENSP00000355501_p.P833Q;ENSP00000355501_p.T640I;ENSP00000355501_p.W1326L;ENSP00000355501_p.W347C;ENSP00000355501_p.P997T;ENSP00000355501_p.S854T;;ENSP00000355501_p.T640I;ENSP00000355501_p.G1211C;ENSP00000355501_p.A493S;ENSP00000355501_p.W347C;ENSP00000355501_p.P833Q;ENSP0000035…	Ref	6.68468	8.23691	5.15641	8.24892	0.00053451	+			119;119;119;119;118;118;118;117;117;117;117;10;10;9;9;9;9;8;7;7	1;1;1;1;1;1;1;1;1;1;1;0;0;0;0;0;0;0;0;0	0;0;0;0;0;0;0;0;0;0;0;0;0;0;0;0;0;0;0;0
11813	LRG_429p1;ENSP00000355645;P68134;P68133;ENSP00000355644;A6NL76;A0A1D5RM20;F8WB63;ENSP00000410706;ENSP00000387182;B8ZZJ2	LRG_429p1;ENSP00000355645;P68134;P68133;ENSP00000355644;A6NL76	Actin, alpha skeletal muscle	Acta1;ACTA1	LRG_429p1_p.K330Q;ENSP00000355645_p.K330Q;;;ENSP00000355644_p.K207Q;;;;;;	Alt+Ref	11.2341	10.2424	-3.29423	11.2763	6.42992e-07	+	Vascular smooth muscle contraction	Muscle contraction;Smooth Muscle Contraction;Striated Muscle Contraction	51;51;51;51;35;35;21;16;16;16;16	23;23;23;23;14;14;7;3;3;3;3	0;0;0;0;0;0;0;0;0;0;0
11833	ENSP00000355877_p.T165A;ENSP00000355877_p.D255E;ENSP00000355877;Q5VT66;Q5VT66-2;ENSP00000355877_p.R179S;ENSP00000385327_p.T73A;ENSP00000499157_p.T150A;ENSP00000385327_p.D180E;ENSP00000385327;ENSP00000499157_p.D240E;ENSP00000499157;A0A494C1P3;ENSP00000385327_p.R87S;H7BYZ9;ENSP00000499157_p.R164S;Q5VT66-3;X6RIL1;ENSP00000409634_p.D68E;ENSP00000409634;A0A087WPC2;D3YZZ3;Q9CW42;ENSP00000434522;H0YDX4	ENSP00000355877_p.T165A;ENSP00000355877_p.D255E;ENSP00000355877;Q5VT66;Q5VT66-2;ENSP00000355877_p.R179S;ENSP00000385327_p.T73A;ENSP00000499157_p.T150A;ENSP00000385327_p.D180E;ENSP00000385327;ENSP00000499157_p.D240E;ENSP00000499157;A0A494C1P3;ENSP00000385327_p.R87S;H7BYZ9;ENSP00000499157_p.R164S;Q5VT66-3	Mitochondrial amidoxime-reducing component 1	MARC1	ENSP00000355877_p.T165A;ENSP00000355877_p.D255E;ENSP00000355877_p.T165A;ENSP00000355877_p.D255E;ENSP00000355877_p.R179S;;;ENSP00000355877_p.R179S;ENSP00000385327_p.T73A;ENSP00000499157_p.T150A;ENSP00000385327_p.D180E;ENSP00000385327_p.T73A;ENSP00000385327_p.D180E;ENSP00000385327_p.R87S;ENSP00000499157_p.D240E;ENSP00000499157_p.T150A;ENSP00000499157_p.D240E;ENSP00000499157_p.R164S;;ENSP00000385327…	Alt	7.25696	9.54573	7.60315	9.54796	1.17968e-13	+	African trypanosomiasis;Allograft rejection;alpha-Linolenic acid metabolism;Aminoacyl-tRNA biosynthesis;Amoebiasis;Antigen processing and presentation;Arachidonic acid metabolism;Arginine and proline metabolism;Asthma;Autoimmune thyroid disease;B cell receptor signaling pathway;beta-Alanine metabolism;Calcium signaling pathway;Cell adhesion molecules (CAMs);Chemical carcinogenesis;Cholesterol met…	Biological oxidations;Metabolism;Phase I - Functionalization of compounds	16;15;15;15;15;14;12;12;11;11;11;11;11;10;10;10;10;4;4;4;3;3;3;2;2	14;13;13;13;13;12;11;10;10;10;9;9;9;9;9;8;9;3;3;3;2;2;2;2;2	14;13;13;13;13;12;11;10;10;10;9;9;9;9;9;8;9;3;3;3;2;2;2;2;2
11888	F5GWN5;ENSP00000400561_p.R315W;ENSP00000400561;ENSP00000356155_p.R315W;ENSP00000356155;O00750;ENSP00000400561_p.C902S;ENSP00000356155_p.C930S;Q5SW97;ENSP00000409554;Q5SW98;ENSP00000401795;D3Z091;REV__E9PW10	F5GWN5;ENSP00000400561_p.R315W;ENSP00000400561;ENSP00000356155_p.R315W;ENSP00000356155;O00750;ENSP00000400561_p.C902S;ENSP00000356155_p.C930S	Phosphatidylinositol 4-phosphate 3-kinase C2 domain-containing subunit beta	PIK3C2B	;ENSP00000400561_p.R315W;ENSP00000400561_p.C902S;ENSP00000400561_p.R315W;ENSP00000356155_p.R315W;ENSP00000356155_p.C930S;ENSP00000356155_p.R315W;;ENSP00000400561_p.C902S;ENSP00000356155_p.C930S;;;;;;	Ref	7.73001	8.80539	3.57232	8.84044	0.000941825	+	Inositol phosphate metabolism;Metabolic pathways;Phosphatidylinositol signaling system	Metabolism;Metabolism of lipids;Phospholipid metabolism;PI Metabolism;Synthesis of PIPs at the plasma membrane	36;36;36;36;36;36;35;35;2;2;2;2;1;1	36;36;36;36;36;36;35;35;2;2;2;2;1;1	12;12;12;12;12;12;12;12;1;1;1;1;0;0
11929	ENSP00000356438;P35354;Q6ZYK7;ENSP00000454130	ENSP00000356438;P35354	Prostaglandin G/H synthase 2	PTGS2		Unspecific	8.85436	7.79574	-3.51665	8.89074	0.000283068	+	Arachidonic acid metabolism;Chemical carcinogenesis;C-type lectin receptor signaling pathway;Human cytomegalovirus infection;Human papillomavirus infection;IL-17 signaling pathway;Kaposi sarcoma-associated herpesvirus infection;Leishmaniasis;Metabolic pathways;MicroRNAs in cancer;NF-kappa B signaling pathway;Ovarian steroidogenesis;Oxytocin signaling pathway;Pathways in cancer;Regulation of lipol…	Arachidonic acid metabolism;Biosynthesis of DHA-derived SPMs;Biosynthesis of DPA-derived SPMs;Biosynthesis of DPAn-3 SPMs;Biosynthesis of electrophilic Ï‰-3 PUFA oxo-derivatives;Biosynthesis of EPA-derived SPMs;Biosynthesis of specialized proresolving mediators (SPMs);Cytokine Signaling in Immune system;Fatty acid metabolism;Immune System;Interleukin-10 signaling;Interleukin-4 and Interleukin-13 …	27;27;5;5	27;27;5;5	24;24;5;5
11978	G3V2N3;G3UZ44;ENSP00000450762;ENSP00000356734;P63013-2;P54821-2;ENSP00000239461;P63013;P54821;Q9CY80;A2APZ7;ENSP00000361547;Q06348;Q99811;A0A0A6YWN6;A0A3B2WCG6;ENSP00000479329;A0A087WVB7;B7ZW86;ENSP00000450687;ENSP00000450456;ENSP00000398704;A6NLG4;A0A140T8S9;ENSP00000370987;ENSP00000335505;F6UTR6;ENSP00000401653;ENSP00000363254;ENSP00000298231;ENSP00000370990;A2AG22;ENSP00000419362;ENSP000003028…	G3V2N3;G3UZ44;ENSP00000450762;ENSP00000356734;P63013-2;P54821-2;ENSP00000239461;P63013;P54821	Paired mesoderm homeobox protein 1	PRRX1;Prrx1	;;;;;;;;;;;;;;;;;;;;;;;;;;;;;;;;;;;;ENSP00000334813_p.D44E;ENSP00000334813_p.D44E;;;ENSP00000361669_p.(G315_A328)del;ENSP00000361669_p.(G315_A328)del;LRG_1256p1_p.R35T;LRG_1256p1_p.P102S;LRG_1256p1_p.P102S;LRG_1256p1_p.R35T;ENSP00000498217_p.R35T;ENSP00000498217_p.P102S;ENSP00000498217_p.P102S;ENSP00000498217_p.R35T;;;;;;;;;;;;;;;;;;;;;;;	Unspecific	8.9295	7.92188	-3.34722	8.9702	0.000305824	+	Signaling pathways regulating pluripotency of stem cells		14;14;14;14;14;14;12;12;12;3;3;3;3;3;1;1;1;1;1;1;1;1;1;1;1;1;1;1;1;1;1;1;1;1;1;1;1;1;1;1;1;1;1;1;1;1;1;1;1;1;1;1;1;1;1;1;1;1;1;1;1;1;1;1;1;1;1;1;1;1;1	14;14;14;14;14;14;12;12;12;3;3;3;3;3;1;1;1;1;1;1;1;1;1;1;1;1;1;1;1;1;1;1;1;1;1;1;1;1;1;1;1;1;1;1;1;1;1;1;1;1;1;1;1;1;1;1;1;1;1;1;1;1;1;1;1;1;1;1;1;1;1	13;13;13;13;13;13;11;11;11;2;2;2;2;2;0;0;0;0;0;0;0;0;0;0;0;0;0;0;0;0;0;0;0;0;0;0;0;0;0;0;0;0;0;0;0;0;0;0;0;0;0;0;0;0;0;0;0;0;0;0;0;0;0;0;0;0;0;0;0;0;0
11979	ENSP00000356737;Q5T7V8;ENSP00000356737_p.E320K;ENSP00000356736;Q5T7V8-3;Q5T7V8-4;Q5T7V8-2	ENSP00000356737;Q5T7V8;ENSP00000356737_p.E320K;ENSP00000356736;Q5T7V8-3;Q5T7V8-4;Q5T7V8-2	RAB6-interacting golgin	GORAB	ENSP00000356737_p.E320K;;ENSP00000356737_p.E320K;;;;	Ref	7.24488	8.5556	4.35409	8.57633	0.000611208	+	p53 signaling pathway		15;15;14;9;9;9;9	15;15;14;9;9;9;9	10;10;9;6;6;6;6
12012	ENSP00000356992_p.P421Q;ENSP00000356992_p.L591V;ENSP00000356992;Q7Z6I6;ENSP00000356992_p.R978K;ENSP00000356995_p.P421Q;ENSP00000356995_p.L591V;ENSP00000356995;A0A0A0MRJ9;Q7Z6I6-2;ENSP00000356995_p.R767K;Q7Z6I6-3;ENSP00000356994_p.P244Q;ENSP00000356994_p.L414V;ENSP00000356994;A0A0A0MRJ8;ENSP00000356994_p.R801K;Q7Z6I6-4;ENSP00000431291;E9PLT5	ENSP00000356992_p.P421Q;ENSP00000356992_p.L591V;ENSP00000356992;Q7Z6I6;ENSP00000356992_p.R978K;ENSP00000356995_p.P421Q;ENSP00000356995_p.L591V;ENSP00000356995;A0A0A0MRJ9;Q7Z6I6-2;ENSP00000356995_p.R767K;Q7Z6I6-3;ENSP00000356994_p.P244Q;ENSP00000356994_p.L414V;ENSP00000356994;A0A0A0MRJ8;ENSP00000356994_p.R801K	Rho GTPase-activating protein 30	ARHGAP30	ENSP00000356992_p.P421Q;ENSP00000356992_p.L591V;ENSP00000356992_p.R978K;ENSP00000356992_p.L591V;ENSP00000356992_p.P421Q;;ENSP00000356992_p.R978K;ENSP00000356995_p.P421Q;ENSP00000356995_p.L591V;ENSP00000356995_p.R767K;ENSP00000356995_p.L591V;ENSP00000356995_p.P421Q;;;ENSP00000356995_p.R767K;;ENSP00000356994_p.P244Q;ENSP00000356994_p.L414V;ENSP00000356994_p.R801K;ENSP00000356994_p.L414V;ENSP0000035…	Ref	8.91955	7.04963	-6.21175	8.92537	1.10574e-10	+		Rho GTPase cycle;Signal Transduction;Signaling by Rho GTPases	33;33;33;33;32;27;27;27;27;27;26;24;23;23;23;23;22;10;3;3	32;32;32;32;31;26;26;26;26;26;25;23;22;22;22;22;21;10;3;3	24;24;24;24;23;18;18;18;18;18;17;20;20;20;20;20;19;4;2;2
12028	ENSP00000433430_p.N28D;ENSP00000433430;ENSP00000434331_p.N28D;ENSP00000434331;ENSP00000357167_p.N28D;ENSP00000357167;ENSP00000435487_p.N28D;ENSP00000435487;ENSP00000357169_p.N28D;ENSP00000357169;Q96P31-2;Q96P31-7;Q96P31;Q96P31-3;Q96P31-6;R4GNJ6;ENSP00000473680_p.N28D;ENSP00000473680;Q96P31-4;Q96P31-5	ENSP00000433430_p.N28D;ENSP00000433430;ENSP00000434331_p.N28D;ENSP00000434331;ENSP00000357167_p.N28D;ENSP00000357167;ENSP00000435487_p.N28D;ENSP00000435487;ENSP00000357169_p.N28D;ENSP00000357169;Q96P31-2;Q96P31-7;Q96P31;Q96P31-3;Q96P31-6	Fc receptor-like protein 3	FCRL3	ENSP00000433430_p.N28D;ENSP00000433430_p.N28D;ENSP00000434331_p.N28D;ENSP00000434331_p.N28D;ENSP00000357167_p.N28D;ENSP00000357167_p.N28D;ENSP00000435487_p.N28D;ENSP00000435487_p.N28D;ENSP00000357169_p.N28D;ENSP00000357169_p.N28D;;;;;;;ENSP00000473680_p.N28D;ENSP00000473680_p.N28D;;	Unspecific	6.79106	8.77608	6.59411	8.78056	2.98323e-10	+			4;4;4;4;4;4;4;4;4;4;4;4;4;4;4;1;1;1;1;1	4;4;4;4;4;4;4;4;4;4;4;4;4;4;4;1;1;1;1;1	4;4;4;4;4;4;4;4;4;4;4;4;4;4;4;1;1;1;1;1
12058	ENSP00000357429;O15540;ENSP00000348931;O15540-2	ENSP00000357429;O15540;ENSP00000348931;O15540-2	Fatty acid-binding protein, brain	FABP7		Unspecific	8.1488	9.94296	5.96005	9.94988	3.1313e-11	+	PPAR signaling pathway	Metabolism;Metabolism of lipids;NOTCH3 Intracellular Domain Regulates Transcription;Signal Transduction;Signaling by NOTCH;Signaling by NOTCH3;Triglyceride catabolism;Triglyceride metabolism	14;14;13;13	14;14;13;13	12;12;11;11
12064	LRG_1212p1_p.R100G;ENSP00000357459_p.R100G;LRG_1212p1;ENSP00000357459;P55265;P55265-4;LRG_1212p1_p.G1148W;ENSP00000357459_p.G1148W;ENSP00000498137;ENSP00000497932;ENSP00000497790;ENSP00000497555;ENSP00000497210;ENSP00000357456;P55265-5;ENSP00000498137_p.G853W;ENSP00000497932_p.G853W;ENSP00000497790_p.G853W;ENSP00000497555_p.G853W;ENSP00000497210_p.G853W;ENSP00000357456_p.G853W;ENSP00000497434_p.R…	LRG_1212p1_p.R100G;ENSP00000357459_p.R100G;LRG_1212p1;ENSP00000357459;P55265;P55265-4;LRG_1212p1_p.G1148W;ENSP00000357459_p.G1148W;ENSP00000498137;ENSP00000497932;ENSP00000497790;ENSP00000497555;ENSP00000497210;ENSP00000357456;P55265-5;ENSP00000498137_p.G853W;ENSP00000497932_p.G853W;ENSP00000497790_p.G853W;ENSP00000497555_p.G853W;ENSP00000497210_p.G853W;ENSP00000357456_p.G853W	Double-stranded RNA-specific adenosine deaminase	ADAR	LRG_1212p1_p.R100G;ENSP00000357459_p.R100G;LRG_1212p1_p.G1148W;LRG_1212p1_p.K384R;LRG_1212p1_p.R100G;ENSP00000357459_p.G1148W;ENSP00000357459_p.K384R;ENSP00000357459_p.R100G;;;LRG_1212p1_p.G1148W;ENSP00000357459_p.G1148W;ENSP00000498137_p.G853W;ENSP00000498137_p.K89R;ENSP00000497932_p.G853W;ENSP00000497932_p.K89R;ENSP00000497790_p.G853W;ENSP00000497790_p.K89R;ENSP00000497555_p.G853W;ENSP000004975…	Alt+Ref	8.22822	6.58465	-5.45981	8.23798	0.000657409	+	Cytosolic DNA-sensing pathway;Influenza A;Measles	C6 deamination of adenosine;Cytokine Signaling in Immune system;Formation of editosomes by ADAR proteins;Immune System;Interferon alpha/beta signaling;Interferon Signaling;Metabolism of RNA;mRNA Editing;mRNA Editing: A to I Conversion	91;91;90;90;90;89;88;88;82;82;82;82;82;82;82;80;80;80;80;80;80;45;44;44;29;29;12;12	4;4;3;3;3;3;3;3;3;3;3;3;3;3;3;3;3;3;3;3;3;4;3;3;3;3;0;0	0;0;0;0;0;0;0;0;0;0;0;0;0;0;0;0;0;0;0;0;0;0;0;0;0;0;0;0
12082	ENSP00000357643_p.N104S	ENSP00000357643_p.N104S			ENSP00000357643_p.N104S	Alt	9.03208	8.23897	-2.63465	9.09692	0.000594575	+			177	177	0
12085	ENSP00000357668_p.G48R;ENSP00000357665_p.G48R;ENSP00000357668_p.S566L;ENSP00000357668_p.P55S;ENSP00000357668;O43184;ENSP00000357665_p.S566L;ENSP00000357665_p.P55S;ENSP00000357665;O43184-3;O43184-4;O43184-2;ENSP00000391268_p.G48R;Q5JRP2;ENSP00000391268_p.P55S;ENSP00000391268	ENSP00000357668_p.G48R;ENSP00000357665_p.G48R;ENSP00000357668_p.S566L;ENSP00000357668_p.P55S;ENSP00000357668;O43184;ENSP00000357665_p.S566L;ENSP00000357665_p.P55S;ENSP00000357665;O43184-3;O43184-4;O43184-2;ENSP00000391268_p.G48R	Disintegrin and metalloproteinase domain-containing protein 12	ADAM12	ENSP00000357668_p.G48R;ENSP00000357665_p.G48R;ENSP00000357668_p.S566L;ENSP00000357668_p.P55S;ENSP00000357668_p.G48R;ENSP00000357668_p.R71Q;ENSP00000357668_p.S566L;ENSP00000357668_p.P55S;;ENSP00000357665_p.S566L;ENSP00000357665_p.P55S;ENSP00000357665_p.G48R;ENSP00000357665_p.R71Q;ENSP00000357665_p.S566L;ENSP00000357665_p.P55S;;;;ENSP00000391268_p.G48R;;ENSP00000391268_p.P55S;ENSP00000391268_p.G48R…	Alt+Ref	8.52294	7.26703	-4.17203	8.54638	0.000248721	+		Extracellular matrix organization;Invadopodia formation;Signal Transduction;Signaling by EGFR;Signaling by Receptor Tyrosine Kinases	23;22;21;21;21;21;20;20;20;20;20;20;12;10;10;10	23;22;21;21;21;21;20;20;20;20;20;20;12;10;10;10	3;3;1;1;1;1;1;1;1;1;1;1;3;1;1;1
12145	ENSP00000358062_p.C491R;ENSP00000488010_p.C899R	ENSP00000358062_p.C491R;ENSP00000488010_p.C899R			ENSP00000358062_p.C491R;ENSP00000488010_p.C899R	Alt+Ref	8.9519	8.20019	-2.49711	9.02272	0.00107217	+			68;68	68;68	1;1
12205	ENSP00000358498_p.Q1073R;ENSP00000358498_p.(D1020_D1026)del;ENSP00000358498_p.R660Q;ENSP00000358498_p.I619T;ENSP00000358498_p.E393K;ENSP00000358498_p.D1020E;ENSP00000358498;ENSP00000358498_p.1020_1021insE;ENSP00000358495_p.Q1093R;ENSP00000321184_p.Q1093R;O75054;ENSP00000358498_p.I390T;ENSP00000358498_p.R629C;ENSP00000358495_p.(D1040_D1046)del;ENSP00000321184_p.(D1040_D1046)del;ENSP00000358495_p.R…	ENSP00000358498_p.Q1073R;ENSP00000358498_p.(D1020_D1026)del;ENSP00000358498_p.R660Q;ENSP00000358498_p.I619T;ENSP00000358498_p.E393K;ENSP00000358498_p.D1020E;ENSP00000358498;ENSP00000358498_p.1020_1021insE;ENSP00000358495_p.Q1093R;ENSP00000321184_p.Q1093R;O75054;ENSP00000358498_p.I390T;ENSP00000358498_p.R629C;ENSP00000358495_p.(D1040_D1046)del;ENSP00000321184_p.(D1040_D1046)del;ENSP00000358495_p.R…	Immunoglobulin superfamily member 3	IGSF3;Igsf3	ENSP00000358498_p.Q1073R;ENSP00000358498_p.(D1020_D1026)del;ENSP00000358498_p.R660Q;ENSP00000358498_p.I619T;ENSP00000358498_p.E393K;ENSP00000358498_p.D1020E;ENSP00000358498_p.E786X;ENSP00000358498_p.I390T;ENSP00000358498_p.Q1073R;ENSP00000358498_p.R629C;ENSP00000358498_p.R651W;ENSP00000358498_p.1020_1021insE;ENSP00000358498_p.D1020E;ENSP00000358498_p.R660Q;ENSP00000358498_p.E393K;ENSP00000358498_…	Alt	6.90666	9.0365	7.07517	9.0397	1.30918e-11	+			46;45;45;45;45;45;45;45;45;45;45;44;44;44;44;44;44;44;44;44;44;44;44;44;44;44;44;44;43;43;43;43;43;42;42;32;31;31;23;23	46;45;45;45;45;45;45;45;45;45;45;44;44;44;44;44;44;44;44;44;44;44;44;44;44;44;44;44;43;43;43;43;43;42;42;32;31;31;23;23	46;45;45;45;45;45;45;45;45;45;45;44;44;44;44;44;44;44;44;44;44;44;44;44;44;44;44;44;43;43;43;43;43;42;42;32;31;31;23;23
12257	Q60FE5;ENSP00000358872_p.I1593L;ENSP00000358872;ENSP00000480593_p.I1593L;ENSP00000480593;A0A087WWY3;ENSP00000398215;H0Y5F3;F7AVL7;H7C2E7	Q60FE5;ENSP00000358872_p.I1593L;ENSP00000358872;ENSP00000480593_p.I1593L;ENSP00000480593;A0A087WWY3		FLNA	;ENSP00000358872_p.I1593L;ENSP00000358872_p.I1593L;ENSP00000480593_p.I1593L;ENSP00000480593_p.I1593L;;;;;	Unspecific	8.74371	6.66227	-6.91438	8.74729	1.84728e-08	+	Focal adhesion;MAPK signaling pathway;Proteoglycans in cancer;Salmonella infection	Antiviral mechanism by IFN-stimulated genes;Cell junction organization;Cell-Cell communication;Cell-extracellular matrix interactions;Cytokine Signaling in Immune system;GP1b-IX-V activation signalling;Hemostasis;Immune System;Interferon Signaling;OAS antiviral response;Platelet activation, signaling and aggregation;Platelet degranulation;Response to elevated platelet cytosolic Ca2+;RHO GTPase Ef…	230;230;230;193;193;193;13;13;5;5	2;2;2;2;2;2;0;0;0;0	2;2;2;2;2;2;0;0;0;0
12331	ENSP00000359490_p.Y541N;ENSP00000359490_p.L549M;ENSP00000359490_p.E551R;ENSP00000359490_p.E551K;ENSP00000359490_p.E551G;ENSP00000359490;Q96PP9	ENSP00000359490_p.Y541N;ENSP00000359490_p.L549M;ENSP00000359490_p.E551R;ENSP00000359490_p.E551K;ENSP00000359490_p.E551G;ENSP00000359490;Q96PP9	Guanylate-binding protein 4	GBP4	ENSP00000359490_p.Y541N;ENSP00000359490_p.L549M;ENSP00000359490_p.E551R;ENSP00000359490_p.E551K;ENSP00000359490_p.E551G;ENSP00000359490_p.E551G;ENSP00000359490_p.E551K;ENSP00000359490_p.L549M;ENSP00000359490_p.Y541N;ENSP00000359490_p.E551R;	Unspecific	8.74747	7.36345	-4.59762	8.76505	0.000143208	+	NOD-like receptor signaling pathway	Cytokine Signaling in Immune system;Immune System;Interferon gamma signaling;Interferon Signaling	20;20;20;20;20;20;20	19;19;19;19;19;19;19	14;14;14;14;14;14;14
12336	ENSP00000359504;P32455	ENSP00000359504;P32455	Interferon-induced guanylate-binding protein 1	GBP1	ENSP00000359504_p.A409G;ENSP00000359504_p.T349S;	Alt+Ref	9.63864	7.861	-5.90519	9.64582	1.13808e-14	+	NOD-like receptor signaling pathway	Cytokine Signaling in Immune system;Immune System;Interferon gamma signaling;Interferon Signaling	37;37	37;37	0;0
12371	ENSP00000359783;Q8TCB0;ENSP00000359783_p.W9R;ENSP00000399477;C9JUM8;ENSP00000400001;H7C1F3;ENSP00000400001_p.W50CfsX26;Q8TCB0-2	ENSP00000359783;Q8TCB0;ENSP00000359783_p.W9R;ENSP00000399477;C9JUM8	Interferon-induced protein 44	IFI44	ENSP00000359783_p.W9R;;ENSP00000359783_p.W9R;;;ENSP00000400001_p.W50CfsX26;;ENSP00000400001_p.W50CfsX26;	Ref	8.6876	6.09866	-8.60026	8.68871	3.59056e-12	+			22;22;21;11;11;2;2;2;2	22;22;21;11;11;2;2;2;2	22;22;21;11;11;2;2;2;2
12462	ENSP00000360635_p.A89G;ENSP00000360635;Q9UHL4;ENSP00000360635_p.S120F;ENSP00000360635_p.P275H;ENSP00000473309;R4GMR2;ENSP00000473309_p.P38H;R4GNE8;ENSP00000473618_p.A86G;ENSP00000473618;ENSP00000473618_p.S117F;ENSP00000473430_p.A38G;ENSP00000473430;R4GN05;ENSP00000473430_p.S69F;ENSP00000473364_p.P80A;ENSP00000473364_p.P111S;ENSP00000473364;R4GMV4;ENSP00000473354_p.S36L;ENSP00000473354;R4GMU5	ENSP00000360635_p.A89G;ENSP00000360635;Q9UHL4;ENSP00000360635_p.S120F;ENSP00000360635_p.P275H	Dipeptidyl peptidase 2	DPP7	ENSP00000360635_p.A89G;ENSP00000360635_p.P275H;ENSP00000360635_p.S120F;ENSP00000360635_p.A89G;;ENSP00000360635_p.S120F;ENSP00000360635_p.P275H;ENSP00000473309_p.P38H;;ENSP00000473309_p.P38H;;ENSP00000473618_p.A86G;ENSP00000473618_p.S117F;ENSP00000473618_p.A86G;ENSP00000473618_p.S117F;ENSP00000473430_p.A38G;ENSP00000473430_p.S69F;ENSP00000473430_p.A38G;;ENSP00000473430_p.S69F;ENSP00000473364_p.P80…	Ref	8.76925	9.70692	3.11487	9.75436	0.00142328	+		Immune System;Innate Immune System;Neutrophil degranulation	24;24;24;23;23;11;11;10;6;6;6;5;4;4;4;3;2;2;2;2;1;1;1	24;24;24;23;23;11;11;10;6;6;6;5;4;4;4;3;2;2;2;2;1;1;1	23;23;23;22;23;10;10;10;6;6;6;5;4;4;4;3;2;2;2;2;1;1;1
12497	ENSP00000360869;P09914;ENSP00000441968;P09914-2	ENSP00000360869;P09914;ENSP00000441968;P09914-2	Interferon-induced protein with tetratricopeptide repeats 1	IFIT1		Unspecific	8.87062	7.95921	-3.02765	8.92086	0.000990126	+	Hepatitis C	Antiviral mechanism by IFN-stimulated genes;Cytokine Signaling in Immune system;Immune System;Interferon alpha/beta signaling;Interferon Signaling;ISG15 antiviral mechanism	33;33;31;31	31;31;29;29	29;29;27;27
12508	ENSP00000361009_p.V1240I;ENSP00000361009_p.Q786H;ENSP00000361009_p.K1340E;ENSP00000361009;Q8TCU6;ENSP00000361009_p.A1486S;ENSP00000361009_p.V659M;Q8TCU6-3;Q8TCU6-2;ENSP00000434632_p.V561I;ENSP00000434632_p.Q107H;ENSP00000434632_p.K661E;ENSP00000434632;H0YDZ4	ENSP00000361009_p.V1240I;ENSP00000361009_p.Q786H;ENSP00000361009_p.K1340E;ENSP00000361009;Q8TCU6;ENSP00000361009_p.A1486S;ENSP00000361009_p.V659M;Q8TCU6-3	Phosphatidylinositol 3,4,5-trisphosphate-dependent Rac exchanger 1 protein	PREX1	ENSP00000361009_p.V1240I;ENSP00000361009_p.Q786H;ENSP00000361009_p.K1340E;ENSP00000361009_p.A1486S;ENSP00000361009_p.V659M;ENSP00000361009_p.K1340E;ENSP00000361009_p.V1240I;ENSP00000361009_p.Q786H;;ENSP00000361009_p.A1486S;ENSP00000361009_p.V659M;;;ENSP00000434632_p.V561I;ENSP00000434632_p.Q107H;ENSP00000434632_p.K661E;ENSP00000434632_p.K661E;ENSP00000434632_p.V561I;ENSP00000434632_p.Q107H;	Ref	8.97707	8.10066	-2.91137	9.03127	0.000168264	+	Chemokine signaling pathway;Kaposi sarcoma-associated herpesvirus infection	Cell death signalling via NRAGE, NRIF and NADE;Death Receptor Signalling;G alpha (12/13) signalling events;GPCR downstream signalling;NRAGE signals death through JNK;p75 NTR receptor-mediated signalling;Rho GTPase cycle;Signal Transduction;Signaling by GPCR;Signaling by Rho GTPases	67;67;67;67;67;66;66;57;33;23;23;23;23;23	67;67;67;67;67;66;66;57;33;23;23;23;23;23	30;30;30;30;30;29;29;23;20;13;13;13;13;13
12543	ENSP00000361287;Q00266;ENSP00000414961;B1ANE6	ENSP00000361287;Q00266	S-adenosylmethionine synthase isoform type-1	MAT1A		Unspecific	7.40943	9.37491	6.52918	9.37959	1.63637e-12	+	Biosynthesis of amino acids;Cysteine and methionine metabolism;Metabolic pathways	Biological oxidations;Defective MAT1A causes Methionine adenosyltransferase deficiency (MATD);Disease;Diseases of metabolism;Metabolic disorders of biological oxidation enzymes;Metabolism;Metabolism of amino acids and derivatives;Metabolism of ingested SeMet, Sec, MeSec into H2Se;Methylation;Phase II - Conjugation of compounds;Selenoamino acid metabolism;Sulfur amino acid metabolism	19;19;4;4	14;14;4;4	5;5;1;1
12552	LRG_40p1;ENSP00000361359;P25942;ENSP00000484074;A0A087X1D0;ENSP00000434825;H0YE23;ENSP00000361350;P25942-2	LRG_40p1;ENSP00000361359;P25942	Tumor necrosis factor receptor superfamily member 5	CD40		Unspecific	8.89992	7.4973	-4.6594	8.91678	9.0193e-07	+	Allograft rejection;Asthma;Autoimmune thyroid disease;Cell adhesion molecules (CAMs);Cytokine-cytokine receptor interaction;Epstein-Barr virus infection;Human T-cell leukemia virus 1 infection;Intestinal immune network for IgA production;Malaria;NF-kappa B signaling pathway;Primary immunodeficiency;Systemic lupus erythematosus;Toll-like receptor signaling pathway;Toxoplasmosis;Transcriptional mis…	Adaptive Immune System;Cytokine Signaling in Immune system;Immune System;Immunoregulatory interactions between a Lymphoid and a non-Lymphoid cell;TNF receptor superfamily (TNFSF) members mediating non-canonical NF-kB pathway;TNFR2 non-canonical NF-kB pathway	10;10;10;3;3;3;3;3;3	10;10;10;3;3;3;3;3;3	9;9;9;3;3;3;3;3;3
12656	ENSP00000362130;ENSP00000362121;Q9Y366;Q62559;F6RBL8	ENSP00000362130;ENSP00000362121;Q9Y366;Q62559	Intraflagellar transport protein 52 homolog	IFT52;Ift52		Unspecific	6.27985	8.11708	6.10316	8.12335	9.65344e-05	+		Cilium Assembly;Hedgehog 'off' state;Intraflagellar transport;Organelle biogenesis and maintenance;Signal Transduction;Signaling by Hedgehog	12;12;12;7;5	12;12;12;7;5	12;12;12;7;5
12731	ENSP00000362682_p.T364P;ENSP00000362682_p.T363P;ENSP00000362682_p.T362P;ENSP00000362682_p.T361P;ENSP00000362682_p.T309A;ENSP00000362682_p.A365P;ENSP00000362682;Q68BL7;Q68BL7-2;Q5JTM7;ENSP00000336425_p.T273A;ENSP00000336425;ENSP00000288815_p.T95A;ENSP00000288815_p.T150P;ENSP00000288815_p.T149P;ENSP00000288815_p.T148P;ENSP00000288815_p.T147P;ENSP00000288815_p.A151P;ENSP00000288815;Q68BL7-3	ENSP00000362682_p.T364P;ENSP00000362682_p.T363P;ENSP00000362682_p.T362P;ENSP00000362682_p.T361P;ENSP00000362682_p.T309A;ENSP00000362682_p.A365P;ENSP00000362682;Q68BL7;Q68BL7-2;Q5JTM7;ENSP00000336425_p.T273A;ENSP00000336425	Olfactomedin-like protein 2A	OLFML2A	ENSP00000362682_p.T364P;ENSP00000362682_p.T363P;ENSP00000362682_p.T362P;ENSP00000362682_p.T361P;ENSP00000362682_p.T309A;ENSP00000362682_p.A365P;ENSP00000362682_p.T309A;ENSP00000362682_p.T361P;ENSP00000362682_p.T362P;ENSP00000362682_p.T363P;ENSP00000362682_p.T364P;ENSP00000362682_p.A365P;;;;ENSP00000336425_p.T273A;ENSP00000336425_p.T273A;ENSP00000288815_p.T95A;ENSP00000288815_p.T150P;ENSP000002888…	Unspecific	7.00277	9.0247	6.71669	9.0288	1.43926e-10	+			20;20;20;20;20;20;20;20;19;11;11;11;9;9;9;9;9;9;9;9	20;20;20;20;20;20;20;20;19;11;11;11;9;9;9;9;9;9;9;9	10;10;10;10;10;10;10;10;9;6;6;6;4;4;4;4;4;4;4;4
12781	ENSP00000443183_p.M329R;ENSP00000443183;ENSP00000362994_p.M329R;ENSP00000362994;Q13077;ENSP00000438583_p.M207R;ENSP00000438583;Q13077-2	ENSP00000443183_p.M329R;ENSP00000443183;ENSP00000362994_p.M329R;ENSP00000362994;Q13077;ENSP00000438583_p.M207R;ENSP00000438583;Q13077-2	TNF receptor-associated factor 1	TRAF1	ENSP00000443183_p.M329R;ENSP00000443183_p.M329R;ENSP00000362994_p.M329R;ENSP00000362994_p.M329R;;ENSP00000438583_p.M207R;ENSP00000438583_p.M207R;	Unspecific	8.94956	7.13254	-6.03602	8.95613	3.44218e-10	+	Apoptosis;NF-kappa B signaling pathway;Pathways in cancer;Small cell lung cancer;TNF signaling pathway;Transcriptional misregulation in cancer;Viral carcinogenesis	Death Receptor Signalling;Regulation of TNFR1 signaling;Signal Transduction;TNF signaling;TNFR1-induced NFkappaB signaling pathway	25;25;25;25;25;16;16;16	25;25;25;25;25;16;16;16	17;17;17;17;17;8;8;8
12791	LRG_380p1;ENSP00000363071;P17661	LRG_380p1;ENSP00000363071;P17661	Desmin	DES		Unspecific	10.2802	8.40692	-6.22279	10.2859	7.13256e-20	+	Arrhythmogenic right ventricular cardiomyopathy (ARVC);Dilated cardiomyopathy (DCM);Hypertrophic cardiomyopathy (HCM)	Muscle contraction;Striated Muscle Contraction	68;68;68	61;61;61	19;19;19
12901	ENSP00000364000_p.E1492K;ENSP00000364000_p.M361L;ENSP00000364000;P05997;ENSP00000364000_p.P460S;ENSP00000482184_p.E1105K;ENSP00000482184;A0A087WYX9	ENSP00000364000_p.E1492K;ENSP00000364000_p.M361L;ENSP00000364000;P05997;ENSP00000364000_p.P460S;ENSP00000482184_p.E1105K;ENSP00000482184;A0A087WYX9	Collagen alpha-2(V) chain	COL5A2	ENSP00000364000_p.E1492K;ENSP00000364000_p.M361L;ENSP00000364000_p.E1492K;ENSP00000364000_p.G282E;ENSP00000364000_p.P460S;ENSP00000364000_p.M361L;;ENSP00000364000_p.P460S;ENSP00000482184_p.E1105K;ENSP00000482184_p.E1105K;ENSP00000482184_p.G72E;	Alt+Ref	9.79284	8.92072	-2.89713	9.84754	1.83375e-05	+	Protein digestion and absorption	Assembly of collagen fibrils and other multimeric structures;Axon guidance;Collagen biosynthesis and modifying enzymes;Collagen chain trimerization;Collagen degradation;Collagen formation;Degradation of the extracellular matrix;Developmental Biology;ECM proteoglycans;Extracellular matrix organization;Integrin cell surface interactions;MET activates PTK2 signaling;MET promotes cell motility;NCAM s…	74;73;73;73;72;58;57;57	74;73;73;73;72;58;57;57	2;1;1;1;1;2;1;1
12910	X6R922;ENSP00000364104_p.L5V;ENSP00000364104;Q5JRL0;ENSP00000364113;ENSP00000364107_p.L5V;ENSP00000364107;Q7Z2X7;ENSP00000364110;Q5JRK9;X6RD31;ENSP00000392976_p.L5V;ENSP00000392976	X6R922;ENSP00000364104_p.L5V;ENSP00000364104;Q5JRL0;ENSP00000364113;ENSP00000364107_p.L5V;ENSP00000364107;Q7Z2X7;ENSP00000364110;Q5JRK9;X6RD31;ENSP00000392976_p.L5V;ENSP00000392976	P antigen family member 2;Putative G antigen family E member 3	PAGE2;PAGE2B	;ENSP00000364104_p.L5V;ENSP00000364104_p.L5V;;;ENSP00000364107_p.L5V;ENSP00000364107_p.L5V;;;;;ENSP00000392976_p.L5V;ENSP00000392976_p.L5V	Unspecific	7.67105	9.48347	6.02071	9.4901	6.21929e-09	+			8;8;8;7;7;7;7;7;6;6;4;4;4	8;8;8;7;7;7;7;7;6;6;4;4;4	8;8;8;7;7;7;7;7;6;6;4;4;4
12929	ENSP00000364277;P98174;P52734;A2ALP5	ENSP00000364277;P98174;P52734;A2ALP5	FYVE, RhoGEF and PH domain-containing protein 1	FGD1;Fgd1		Unspecific	6.85953	8.83414	6.55952	8.83872	3.71879e-10	+	Regulation of actin cytoskeleton	Cell death signalling via NRAGE, NRIF and NADE;Death Receptor Signalling;G alpha (12/13) signalling events;GPCR downstream signalling;NRAGE signals death through JNK;p75 NTR receptor-mediated signalling;Rho GTPase cycle;Signal Transduction;Signaling by GPCR;Signaling by Rho GTPases	34;34;25;23	33;33;24;22	33;33;24;22
12989	ENSP00000384527_p.Y595C;ENSP00000384527_p.V997M;ENSP00000384527;ENSP00000364798_p.Y595C;ENSP00000364798_p.V997M;ENSP00000364798;Q9NUA8;F8WAI8;ENSP00000363782_p.Y483C;ENSP00000363782_p.V885M;ENSP00000363782;ENSP00000496988_p.Y483C;ENSP00000496988;A0A3B3IRZ6;ENSP00000383098;B1AKC8;Q6PCS8;A0A1W2P800;Q9NUA8-2	ENSP00000384527_p.Y595C;ENSP00000384527_p.V997M;ENSP00000384527;ENSP00000364798_p.Y595C;ENSP00000364798_p.V997M;ENSP00000364798;Q9NUA8;F8WAI8;ENSP00000363782_p.Y483C;ENSP00000363782_p.V885M;ENSP00000363782	Zinc finger and BTB domain-containing protein 40	ZBTB40	ENSP00000384527_p.Y595C;ENSP00000384527_p.V997M;ENSP00000384527_p.Y595C;ENSP00000384527_p.V997M;ENSP00000364798_p.Y595C;ENSP00000364798_p.V997M;ENSP00000364798_p.Y595C;ENSP00000364798_p.V997M;;;ENSP00000363782_p.Y483C;ENSP00000363782_p.V885M;ENSP00000363782_p.Y483C;ENSP00000363782_p.V885M;ENSP00000496988_p.Y483C;ENSP00000496988_p.Y483C;;;;;;	Unspecific	8.75751	7.72921	-3.41593	8.7964	0.000411205	+			23;23;23;23;23;23;23;21;21;21;21;11;11;11;7;7;7;5;1	23;23;23;23;23;23;23;21;21;21;21;11;11;11;7;7;7;5;1	23;23;23;23;23;23;23;21;21;21;21;11;11;11;7;7;7;5;1
12999	ENSP00000364887_p.T1288A;ENSP00000364887_p.R2871Q;ENSP00000364887_p.K1413R;ENSP00000364887_p.H341Y;ENSP00000364887_p.A3680V;ENSP00000364887_p.A2961T;ENSP00000364887;ENSP00000497174_p.T1288A;ENSP00000497174_p.R2871Q;ENSP00000497174_p.K1413R;ENSP00000497174_p.H341Y;ENSP00000497174_p.A3687V;ENSP00000497174_p.A2961T;ENSP00000497174;Q8NCM8;Q8NCM8-2;ENSP00000497174_p.P3201LfsX19;ENSP00000364887_p.P3201…	ENSP00000364887_p.T1288A;ENSP00000364887_p.R2871Q;ENSP00000364887_p.K1413R;ENSP00000364887_p.H341Y;ENSP00000364887_p.A3680V;ENSP00000364887_p.A2961T;ENSP00000364887;ENSP00000497174_p.T1288A;ENSP00000497174_p.R2871Q;ENSP00000497174_p.K1413R;ENSP00000497174_p.H341Y;ENSP00000497174_p.A3687V;ENSP00000497174_p.A2961T;ENSP00000497174;Q8NCM8;Q8NCM8-2;ENSP00000497174_p.P3201LfsX19;ENSP00000364887_p.P3201…	Cytoplasmic dynein 2 heavy chain 1	DYNC2H1	ENSP00000364887_p.T1288A;ENSP00000364887_p.R2871Q;ENSP00000364887_p.K1413R;ENSP00000364887_p.H341Y;ENSP00000364887_p.A3680V;ENSP00000364887_p.A2961T;ENSP00000364887_p.P3201LfsX19;ENSP00000364887_p.K1413R;ENSP00000364887_p.R2871Q;ENSP00000364887_p.H341Y;ENSP00000364887_p.T1288A;ENSP00000364887_p.A3680V;ENSP00000364887_p.A2961T;ENSP00000497174_p.T1288A;ENSP00000497174_p.R2871Q;ENSP00000497174_p.K14…	Ref	7.46858	8.91592	4.80798	8.93116	3.28897e-06	+	Phagosome;Salmonella infection;Vasopressin-regulated water reabsorption	Cilium Assembly;Hedgehog 'off' state;Intraflagellar transport;Organelle biogenesis and maintenance;Signal Transduction;Signaling by Hedgehog	162;162;162;162;162;162;162;162;162;162;162;162;162;162;162;162;122;122;47;47;47;26;26;26;23;23;23;15;15;15;13;7;4;3;3;3;1	162;162;162;162;162;162;162;162;162;162;162;162;162;162;162;162;122;122;47;47;47;26;26;26;23;23;23;15;15;15;13;7;4;3;3;3;1	79;79;79;79;79;79;79;79;79;79;79;79;79;79;79;79;65;65;29;29;29;14;14;14;12;12;12;6;6;6;0;0;0;2;2;0;0
13002	ENSP00000364907;ENSP00000364898;P43405;ENSP00000364904;ENSP00000364899;P43405-2;K7ERY4;ENSP00000468465	ENSP00000364907;ENSP00000364898;P43405;ENSP00000364904;ENSP00000364899;P43405-2	Tyrosine-protein kinase SYK	SYK		Unspecific	9.45342	7.96242	-4.95298	9.46722	1.20582e-14	+	B cell receptor signaling pathway;C-type lectin receptor signaling pathway;Epstein-Barr virus infection;Fc epsilon RI signaling pathway;Fc gamma R-mediated phagocytosis;Herpes simplex virus 1 infection;Kaposi sarcoma-associated herpesvirus infection;Natural killer cell mediated cytotoxicity;Neurotrophin signaling pathway;NF-kappa B signaling pathway;Osteoclast differentiation;Phospholipase D sign…	Adaptive Immune System;Antigen activates B Cell Receptor (BCR) leading to generation of second messengers;CLEC7A (Dectin-1) signaling;C-type lectin receptors (CLRs);Cytokine Signaling in Immune system;DAP12 interactions;DAP12 signaling;Dectin-2 family;Downregulation of ERBB2 signaling;Fc epsilon receptor (FCERI) signaling;FCERI mediated Ca+2 mobilization;FCERI mediated MAPK activation;Fcgamma rec…	41;41;41;39;39;39;1;1	41;41;41;39;39;39;1;1	15;15;15;13;13;13;0;0
13076	ENSP00000365693;Q9Y3D2;ENSP00000434990_p.P104L;ENSP00000434990;H0YE51;Q78J03	ENSP00000365693;Q9Y3D2	Methionine-R-sulfoxide reductase B2, mitochondrial	MSRB2	;;ENSP00000434990_p.P104L;ENSP00000434990_p.P104L;;	Unspecific	6.77313	8.4543	5.58472	8.46325	6.25915e-05	+		Metabolism of proteins;Protein repair	10;10;3;3;3;3	10;10;3;3;3;3	10;10;3;3;3;3
13092	LRG_125p1;ENSP00000365891;P42768;ENSP00000410537;C9J3B7	LRG_125p1;ENSP00000365891;P42768	Wiskott-Aldrich syndrome protein	WAS		Unspecific	9.09443	7.32962	-5.86259	9.10183	3.74526e-13	+	Adherens junction;Chemokine signaling pathway;Choline metabolism in cancer;Fc gamma R-mediated phagocytosis;Tight junction;Yersinia infection	Adaptive Immune System;Fcgamma receptor (FCGR) dependent phagocytosis;Generation of second messenger molecules;Immune System;Innate Immune System;Regulation of actin dynamics for phagocytic cup formation;RHO GTPase Effectors;RHO GTPases Activate WASPs and WAVEs;Signal Transduction;Signaling by Rho GTPases;TCR signaling	24;24;24;8;8	24;24;24;8;8	15;15;15;7;7
13096	ENSP00000393843_p.Q2115E;ENSP00000365908_p.Q2115E;ENSP00000393843_p.T1972A;ENSP00000393843_p.T1004M;ENSP00000393843_p.S2618G;ENSP00000393843_p.S2511P;ENSP00000393843_p.P517T;ENSP00000393843_p.P2841H;ENSP00000393843_p.L2365F;ENSP00000393843_p.H1708N;ENSP00000393843_p.E2512K;ENSP00000393843_p.D90N;ENSP00000393843_p.A2184T;ENSP00000393843;A0A088AWP5;ENSP00000393843_p.(1013_1018)insQ_S;ENSP0000036590…	ENSP00000393843_p.Q2115E;ENSP00000365908_p.Q2115E;ENSP00000393843_p.T1972A;ENSP00000393843_p.T1004M;ENSP00000393843_p.S2618G;ENSP00000393843_p.S2511P;ENSP00000393843_p.P517T;ENSP00000393843_p.P2841H;ENSP00000393843_p.L2365F;ENSP00000393843_p.H1708N;ENSP00000393843_p.E2512K;ENSP00000393843_p.D90N;ENSP00000393843_p.A2184T;ENSP00000393843;A0A088AWP5;ENSP00000393843_p.(1013_1018)insQ_S;ENSP0000036590…	Protein prune homolog 2	PRUNE2	ENSP00000393843_p.Q2115E;ENSP00000365908_p.Q2115E;ENSP00000393843_p.T1972A;ENSP00000393843_p.T1004M;ENSP00000393843_p.S2618G;ENSP00000393843_p.S2511P;ENSP00000393843_p.P517T;ENSP00000393843_p.P2841H;ENSP00000393843_p.L2365F;ENSP00000393843_p.H1708N;ENSP00000393843_p.E2512K;ENSP00000393843_p.D90N;ENSP00000393843_p.A2184T;ENSP00000393843_p.(A2711_T2718)del;ENSP00000393843_p.C1506R;ENSP00000393843_p…	Alt+Ref	7.59112	8.75861	3.87833	8.78718	0.000305745	+			65;65;64;64;64;64;64;64;64;64;64;64;64;64;64;64;64;64;64;64;64;64;64;64;64;64;64;64;64;64;64;64;64;63;63;63;63;53;52;52;52;52;52;52;52;52;52;52;52;52;52;51;51;46;45;45;45;45;45;45;45;45;45;45;45;45;44;44;10;10;10;7;7;7;7;7;7;7;4;3;3;3	65;65;64;64;64;64;64;64;64;64;64;64;64;64;64;64;64;64;64;64;64;64;64;64;64;64;64;64;64;64;64;64;64;63;63;63;63;53;52;52;52;52;52;52;52;52;52;52;52;52;52;51;51;46;45;45;45;45;45;45;45;45;45;45;45;45;44;44;10;10;10;7;7;7;7;7;7;7;4;3;3;3	1;1;0;0;0;0;0;0;0;0;0;0;0;0;0;0;0;0;0;0;0;0;0;0;0;0;0;0;0;0;0;0;0;0;0;0;0;1;0;0;0;0;0;0;0;0;0;0;0;0;0;0;0;1;0;0;0;0;0;0;0;0;0;0;0;0;0;0;0;0;0;0;0;0;0;0;0;0;0;0;0;0
13124	ENSP00000366227;ENSP00000392762;P40126;P40126-2;ENSP00000431275;A0A0A0MTD3;P29812	ENSP00000366227;ENSP00000392762;P40126;P40126-2	L-dopachrome tautomerase	DCT		Unspecific	6.99701	9.46498	8.19842	9.46646	1.02325e-15	+	Melanogenesis;Metabolic pathways;Tyrosine metabolism	Melanin biosynthesis;Metabolism;Metabolism of amino acids and derivatives	23;23;23;23;9;9;4	23;23;23;23;9;9;4	23;23;23;23;9;9;4
13142	ENSP00000494278;ENSP00000493895;ENSP00000493527;ENSP00000487082;ENSP00000366416;P24530;P24530-3;ENSP00000495815;A0A2R8Y748;ENSP00000486202;P24530-2;ENSP00000495984;A0A2R8YGF7	ENSP00000494278;ENSP00000493895;ENSP00000493527;ENSP00000487082;ENSP00000366416;P24530;P24530-3;ENSP00000495815;A0A2R8Y748;ENSP00000486202;P24530-2	Endothelin B receptor	EDNRB		Unspecific	6.23491	8.09762	6.1878	8.10354	7.68794e-05	+	Calcium signaling pathway;cGMP-PKG signaling pathway;Melanogenesis;Neuroactive ligand-receptor interaction;Pathways in cancer;Relaxin signaling pathway	Class A/1 (Rhodopsin-like receptors);G alpha (q) signalling events;GPCR downstream signalling;GPCR ligand binding;Peptide ligand-binding receptors;Signal Transduction;Signaling by GPCR	15;15;15;15;15;15;15;12;12;12;12;5;5	15;15;15;15;15;15;15;12;12;12;12;5;5	7;7;7;7;7;7;7;7;7;7;7;1;1
13155	ENSP00000366522;Q9C0H5-2;ENSP00000276826;Q9C0H5;G3X932;P59281;H7BX46;P59281-2;H3BJM3	ENSP00000366522;Q9C0H5-2;ENSP00000276826;Q9C0H5;G3X932;P59281;H7BX46;P59281-2	Rho GTPase-activating protein 39	ARHGAP39;Arhgap39		Unspecific	5.84011	7.81168	6.54941	7.81629	0.000106024	+		Axon guidance;Developmental Biology;Inactivation of CDC42 and RAC1;Rho GTPase cycle;Signal Transduction;Signaling by Rho GTPases;Signaling by ROBO receptors	27;27;26;26;15;15;14;14;2	27;27;26;26;15;15;14;14;2	27;27;26;26;15;15;14;14;2
13186	ENSP00000366927_p.V253M;ENSP00000366927;ENSP00000489053;A0A0U1RQK9;ENSP00000489053_p.R116X;ENSP00000366927_p.R116X	ENSP00000366927_p.V253M;ENSP00000366927			ENSP00000366927_p.V253M;ENSP00000366927_p.R107L;ENSP00000366927_p.R114L;ENSP00000366927_p.R116X;ENSP00000366927_p.V253M;ENSP00000489053_p.R107L;ENSP00000489053_p.R114L;ENSP00000489053_p.R116X;;ENSP00000489053_p.R116X;ENSP00000366927_p.R116X	Alt	9.26937	10.6039	4.43324	10.6236	5.53383e-11	+	Arginine and proline metabolism;Ascorbate and aldarate metabolism;beta-Alanine metabolism;Fatty acid degradation;Glycerolipid metabolism;Glycolysis / Gluconeogenesis;Histidine metabolism;Lysine degradation;Metabolic pathways;Pentose and glucuronate interconversions;Propanoate metabolism;Pyruvate metabolism;Tryptophan metabolism;Valine, leucine and isoleucine degradation	Biological oxidations;Ethanol oxidation;Metabolism;Phase I - Functionalization of compounds	45;44;9;9;7;7	45;44;9;9;7;7	0;0;0;0;0;0
13223	ENSP00000367343;Q9HCG7;ENSP00000367343_p.P177H;ENSP00000367334;Q9HCG7-2;ENSP00000367334_p.P177H;Q9HCG7-3;ENSP00000367328;A0A0A0MRV1	ENSP00000367343;Q9HCG7;ENSP00000367343_p.P177H;ENSP00000367334;Q9HCG7-2;ENSP00000367334_p.P177H;Q9HCG7-3	Non-lysosomal glucosylceramidase	GBA2	ENSP00000367343_p.P177H;;ENSP00000367343_p.P177H;ENSP00000367334_p.P177H;;ENSP00000367334_p.P177H;;;	Ref	7.0827	8.95006	6.20321	8.95591	1.13432e-09	+	Metabolic pathways;Other glycan degradation;Sphingolipid metabolism	Glycosphingolipid metabolism;Metabolism;Metabolism of lipids;Sphingolipid metabolism	31;31;30;28;28;27;21;3;3	31;31;30;28;28;27;21;3;3	25;25;24;23;23;22;16;3;3
13250	ENSP00000367638_p.C5F;ENSP00000436756;ENSP00000367638;Q8N4T4-2;Q8N4T4;Q8N4T4-4;ENSP00000436519_p.C5F;ENSP00000436519;Q8N4T4-3;Q66JY6;F6S324;F6V695;Q66JY6-2	ENSP00000367638_p.C5F;ENSP00000436756;ENSP00000367638;Q8N4T4-2;Q8N4T4;Q8N4T4-4	Rho guanine nucleotide exchange factor 39	ARHGEF39	ENSP00000367638_p.C5F;;ENSP00000367638_p.C5F;;;;ENSP00000436519_p.C5F;ENSP00000436519_p.C5F;;;;;	Alt	6.43711	8.11511	5.5742	8.12413	0.000375435	+		Cell death signalling via NRAGE, NRIF and NADE;Death Receptor Signalling;G alpha (12/13) signalling events;GPCR downstream signalling;NRAGE signals death through JNK;p75 NTR receptor-mediated signalling;Rho GTPase cycle;Signal Transduction;Signaling by GPCR;Signaling by Rho GTPases	11;10;10;10;10;8;4;3;3;2;1;1;1	11;10;10;10;10;8;4;3;3;2;1;1;1	11;10;10;10;10;8;4;3;3;2;1;1;1
13253	ENSP00000479842;ENSP00000419603;ENSP00000418330;ENSP00000418120;ENSP00000417782;ENSP00000367731;ENSP00000367728;ENSP00000367726;ENSP00000367723;ENSP00000367719;Q9H098;Q3TGF2;ENSP00000418395;C9J6N5;ENSP00000420249;C9JQ40;ENSP00000413676;C9JW51;ENSP00000420444;A0A1C7CYX8;H9H9T1;ENSP00000181796;A0A2I3BR29;Q9H098-2;ENSP00000417242;C9J3Q3;X6RET8;ENSP00000397949;ENSP00000420314;C9JP05;H3BLM7;ENSP000004…	ENSP00000479842;ENSP00000419603;ENSP00000418330;ENSP00000418120;ENSP00000417782;ENSP00000367731;ENSP00000367728;ENSP00000367726;ENSP00000367723;ENSP00000367719;Q9H098;Q3TGF2;ENSP00000418395;C9J6N5;ENSP00000420249;C9JQ40;ENSP00000413676;C9JW51;ENSP00000420444;A0A1C7CYX8;H9H9T1;ENSP00000181796;A0A2I3BR29;Q9H098-2;ENSP00000417242;C9J3Q3;X6RET8;ENSP00000397949;ENSP00000420314;C9JP05;H3BLM7	Protein FAM107B	FAM107B;Fam107b		Unspecific	9.05317	7.48414	-5.21221	9.06473	8.43143e-11	+			11;11;11;11;11;11;11;11;11;11;11;11;10;10;10;10;10;10;10;10;10;10;10;10;9;9;8;8;8;8;6;5;5;5;5;2;2;2	11;11;11;11;11;11;11;11;11;11;11;11;10;10;10;10;10;10;10;10;10;10;10;10;9;9;8;8;8;8;6;5;5;5;5;2;2;2	11;11;11;11;11;11;11;11;11;11;11;11;10;10;10;10;10;10;10;10;10;10;10;10;9;9;8;8;8;8;6;5;5;5;5;2;2;2
13304	ENSP00000368335;P15559-2;ENSP00000368335_p.P153S;ENSP00000319788_p.P187S;ENSP00000319788;P15559;ENSP00000398330_p.P115S;ENSP00000398330;B4DLR8;ENSP00000368334_p.P149S;ENSP00000368334;P15559-3;H3BNV2;ENSP00000455020_p.P166S;ENSP00000455020;H3BRK3;ENSP00000456282_p.P149S;ENSP00000456282	ENSP00000368335;P15559-2;ENSP00000368335_p.P153S;ENSP00000319788_p.P187S;ENSP00000319788;P15559;ENSP00000398330_p.P115S;ENSP00000398330;B4DLR8;ENSP00000368334_p.P149S;ENSP00000368334;P15559-3;H3BNV2;ENSP00000455020_p.P166S;ENSP00000455020;H3BRK3;ENSP00000456282_p.P149S;ENSP00000456282	NAD(P)H dehydrogenase [quinone] 1	NQO1	ENSP00000368335_p.P153S;;ENSP00000368335_p.P153S;ENSP00000319788_p.P187S;ENSP00000319788_p.P187S;;ENSP00000398330_p.P115S;ENSP00000398330_p.P115S;;ENSP00000368334_p.P149S;ENSP00000368334_p.P149S;;;ENSP00000455020_p.P166S;ENSP00000455020_p.P166S;;ENSP00000456282_p.P149S;ENSP00000456282_p.P149S	Ref	8.61562	9.97073	4.50157	9.98949	7.82223e-07	+	Fluid shear stress and atherosclerosis;Hepatocellular carcinoma;Metabolic pathways;Pathways in cancer;Ubiquinone and other terpenoid-quinone biosynthesis	Metabolism;Metabolism of amino acids and derivatives;Metabolism of polyamines;Regulation of ornithine decarboxylase (ODC)	22;22;21;21;21;21;19;19;19;19;19;19;18;18;18;15;15;15	22;22;21;21;21;21;19;19;19;19;19;19;18;18;18;15;15;15	20;20;19;19;19;19;17;17;17;17;17;17;17;17;17;14;14;14
13341	ENSP00000445331_p.V287A;ENSP00000395337_p.V287A;ENSP00000368722_p.V287A;ENSP00000445175_p.V316A;ENSP00000406172_p.V229A;ENSP00000227157;P00338-5;ENSP00000379524;P00338-2;F5GXY2;ENSP00000440161;F5GYU2;ENSP00000441241;F5GXH2;ENSP00000446415;F5H5J4;ENSP00000443362;F5H6W8;ENSP00000442979;F5H8H6;ENSP00000443545;F5GXC7;F5GWW2;ENSP00000442637;ENSP00000441699;ENSP00000441058;F5GXU1;ENSP00000486249;ENSP00…	ENSP00000445331_p.V287A;ENSP00000395337_p.V287A;ENSP00000368722_p.V287A;ENSP00000445175_p.V316A;ENSP00000406172_p.V229A;ENSP00000227157;P00338-5;ENSP00000379524;P00338-2	L-lactate dehydrogenase A chain	LDHA	ENSP00000445331_p.V287A;ENSP00000395337_p.V287A;ENSP00000368722_p.V287A;ENSP00000445175_p.V316A;ENSP00000406172_p.V229A;;;;;;;;;;;;;;;;;;;;;;;;	Alt+Ref	8.68468	9.94532	4.18776	9.96852	4.78802e-06	+	Central carbon metabolism in cancer;Cysteine and methionine metabolism;Glucagon signaling pathway;Glycolysis / Gluconeogenesis;HIF-1 signaling pathway;Metabolic pathways;Propanoate metabolism;Pyruvate metabolism	Metabolism;Pyruvate metabolism;Pyruvate metabolism and Citric Acid (TCA) cycle;The citric acid (TCA) cycle and respiratory electron transport	44;44;44;42;37;29;29;27;27;20;20;19;19;17;17;13;13;13;13;6;6;6;6;6;6;6;5;5;5	2;2;2;2;2;0;0;0;0;0;0;0;0;0;0;0;0;0;0;0;0;0;0;0;0;0;0;0;0	2;2;2;2;2;0;0;0;0;0;0;0;0;0;0;0;0;0;0;0;0;0;0;0;0;0;0;0;0
13365	ENSP00000368928;P05549-5;Q8BPN4;P34056-3;ENSP00000316516;ENSP00000418541;ENSP00000368933;P05549-6;P05549;A0A286YCU0;A0A0R4J1E6;A0A286YDR3;A0A286YD43;P34056;P34056-4;P34056-2;ENSP00000419696;H7C5E5;ENSP00000417495;C1K3N0;P05549-2;ENSP00000419961;C9JXZ2;E9Q5N4;Q8CE69;ENSP00000377265;Q61313;Q92481;Q92481-2;F8WDC8;ENSP00000420568;ENSP00000418391;C9J6N8	ENSP00000368928;P05549-5;Q8BPN4;P34056-3;ENSP00000316516;ENSP00000418541;ENSP00000368933;P05549-6;P05549;A0A286YCU0;A0A0R4J1E6;A0A286YDR3;A0A286YD43;P34056;P34056-4;P34056-2;ENSP00000419696;H7C5E5;ENSP00000417495;C1K3N0;P05549-2	Transcription factor AP-2-alpha	TFAP2A;Tfap2a		Unspecific	6.4387	8.79322	7.82155	8.79514	5.68652e-14	+		Activation of the TFAP2 (AP-2) family of transcription factors;Gene expression (Transcription);Generic Transcription Pathway;Metabolism of proteins;Negative regulation of activity of TFAP2 (AP-2) family transcription factors;Post-translational protein modification;RNA Polymerase II Transcription;SUMO E3 ligases SUMOylate target proteins;SUMOylation;SUMOylation of transcription factors;TFAP2 (AP-2…	20;20;19;19;18;18;18;18;18;17;17;17;17;17;17;15;11;11;11;11;11;9;9;7;7;7;7;7;7;2;2;2;2	20;20;19;19;18;18;18;18;18;17;17;17;17;17;17;15;11;11;11;11;11;9;9;7;7;7;7;7;7;2;2;2;2	11;11;10;10;9;9;9;9;9;8;8;8;8;8;8;6;5;5;5;5;5;3;3;2;2;2;2;2;2;2;2;2;2
13378	ENSP00000369067_p.R726Q;ENSP00000369067;Q15063-5	ENSP00000369067_p.R726Q;ENSP00000369067;Q15063-5	Periostin	POSTN	ENSP00000369067_p.R726Q;ENSP00000369067_p.R726Q;	Unspecific	10.6847	9.62703	-3.51346	10.7211	1.23441e-07	+			59;59;59	59;59;59	0;0;0
13432	ENSP00000369677;Q9Y6C2;ENSP00000411201;A0A0A0MT20;Q9Y6C2-2	ENSP00000369677;Q9Y6C2	EMILIN-1	EMILIN1		Unspecific	10.4521	9.63366	-2.71878	10.5135	3.14365e-05	+		Elastic fibre formation;Extracellular matrix organization;Molecules associated with elastic fibres	63;63;22;22;22	63;63;22;22;22	45;45;10;10;10
13442	ENSP00000369786;ENSP00000369785;O00625	ENSP00000369786;ENSP00000369785;O00625	Pirin	PIR		Unspecific	8.65212	10.1492	4.97316	10.1628	4.02848e-08	+		Digestion;Digestion and absorption	23;23;23	23;23;23	12;12;12
13472	ENSP00000370074_p.E325K;ENSP00000370074;P50453	ENSP00000370074_p.E325K;ENSP00000370074;P50453	Serpin B9	SERPINB9	ENSP00000370074_p.E325K;ENSP00000370074_p.E325K;	Alt	9.86261	8.80209	-3.523	9.89884	2.86326e-07	+	Amoebiasis		24;23;23	24;23;23	22;21;21
13515	ENSP00000370546_p.S224C;ENSP00000370546_p.E281K;ENSP00000370546;P51689-3;P51689;P51689-2;H7C327;ENSP00000409180	ENSP00000370546_p.S224C;ENSP00000370546_p.E281K;ENSP00000370546;P51689-3;P51689	Arylsulfatase D	ARSD	ENSP00000370546_p.S224C;ENSP00000370546_p.E281K;ENSP00000370546_p.S224C;ENSP00000370546_p.E281K;;;;;	Unspecific	5.66719	7.39093	5.72615	7.39906	0.000731723	+		Gamma carboxylation, hypusine formation and arylsulfatase activation;Glycosphingolipid metabolism;Metabolism;Metabolism of lipids;Metabolism of proteins;Post-translational protein modification;Sphingolipid metabolism;The activation of arylsulfatases	8;8;8;8;8;3;1;1	6;6;6;6;6;2;1;1	6;6;6;6;6;2;1;1
13534	ENSP00000384771;ENSP00000370724;Q9H0Q0;Q8BHZ0;ENSP00000392154;C9IYV6;ENSP00000388979;C9JPE5	ENSP00000384771;ENSP00000370724;Q9H0Q0;Q8BHZ0	Protein FAM49A	FAM49A;Fam49a		Unspecific	8.49254	7.46195	-3.42356	8.53124	0.00148194	+			14;14;14;14;3;3;2;2	11;11;11;11;3;3;2;2	11;11;11;11;3;3;2;2
13599	ENSP00000371554_p.A58T;M0R1V4;ENSP00000472134	ENSP00000371554_p.A58T			ENSP00000371554_p.A58T;;	Alt+Ref	9.40621	7.65441	-5.81936	9.41383	1.80455e-12	+		Cellular responses to external stimuli;Cellular responses to stress;Detoxification of Reactive Oxygen Species	11;1;1	11;1;1	2;0;0
13611	ENSP00000477725_p.I867L;ENSP00000477725_p.I18V;ENSP00000477725;ENSP00000371740_p.I867L;ENSP00000371740_p.I18V;ENSP00000371740;ENSP00000371734_p.I867L;ENSP00000371734_p.I18V;ENSP00000371734;Q14678;ENSP00000371730_p.I709L;ENSP00000371730;ENSP00000477725_p.I1055T;ENSP00000371740_p.I1055T;ENSP00000371734_p.I1055T;Q14678-2;ENSP00000371730_p.I897T;Q5W0W3;ENSP00000371726;ENSP00000371726_p.I32T	ENSP00000477725_p.I867L;ENSP00000477725_p.I18V;ENSP00000477725;ENSP00000371740_p.I867L;ENSP00000371740_p.I18V;ENSP00000371740;ENSP00000371734_p.I867L;ENSP00000371734_p.I18V;ENSP00000371734;Q14678;ENSP00000371730_p.I709L;ENSP00000371730;ENSP00000477725_p.I1055T;ENSP00000371740_p.I1055T;ENSP00000371734_p.I1055T;Q14678-2;ENSP00000371730_p.I897T	KN motif and ankyrin repeat domain-containing protein 1	KANK1	ENSP00000477725_p.I867L;ENSP00000477725_p.I18V;ENSP00000477725_p.E432Q;ENSP00000477725_p.I1055T;ENSP00000477725_p.S464A;ENSP00000477725_p.I18V;ENSP00000477725_p.I867L;ENSP00000371740_p.I867L;ENSP00000371740_p.I18V;ENSP00000371740_p.E432Q;ENSP00000371740_p.I1055T;ENSP00000371740_p.S464A;ENSP00000371740_p.I18V;ENSP00000371740_p.I867L;ENSP00000371734_p.I867L;ENSP00000371734_p.I18V;ENSP00000371734_p.…	Alt+Ref	7.4501	9.53299	6.91919	9.53656	1.76905e-11	+		ESR-mediated signaling;Estrogen-dependent gene expression;Signal Transduction;Signaling by Nuclear Receptors	59;59;59;59;59;59;59;59;59;59;58;58;58;58;58;58;57;15;15;14	59;59;59;59;59;59;59;59;59;59;58;58;58;58;58;58;57;15;15;14	0;0;0;0;0;0;0;0;0;0;0;0;0;0;0;0;0;0;0;0
13650	I3L0B8;ENSP00000372612;Q3SY17;ENSP00000372612_p.L249I	I3L0B8;ENSP00000372612;Q3SY17;ENSP00000372612_p.L249I	Solute carrier family 25 member 52	SLC25A52	;ENSP00000372612_p.L249I;;ENSP00000372612_p.L249I	Ref	6.10226	7.99885	6.30032	8.00432	0.00103986	+			11;11;11;10	1;1;1;0	1;1;1;0
13672	ENSP00000457456_p.V219G;ENSP00000457456_p.S281R;ENSP00000457456_p.Q306H;ENSP00000457456;ENSP00000456620_p.V219G;ENSP00000456620_p.S281R;ENSP00000456620_p.Q306H;ENSP00000456620;ENSP00000455351_p.V219G;ENSP00000455351_p.S281R;ENSP00000455351_p.Q306H;ENSP00000455351;ENSP00000444911_p.V219G;ENSP00000444911_p.S281R;ENSP00000444911_p.Q306H;ENSP00000444911;ENSP00000373465_p.V219G;ENSP00000373465_p.S281R…	ENSP00000457456_p.V219G;ENSP00000457456_p.S281R;ENSP00000457456_p.Q306H;ENSP00000457456;ENSP00000456620_p.V219G;ENSP00000456620_p.S281R;ENSP00000456620_p.Q306H;ENSP00000456620;ENSP00000455351_p.V219G;ENSP00000455351_p.S281R;ENSP00000455351_p.Q306H;ENSP00000455351;ENSP00000444911_p.V219G;ENSP00000444911_p.S281R;ENSP00000444911_p.Q306H;ENSP00000444911;ENSP00000373465_p.V219G;ENSP00000373465_p.S281R…	G-protein coupled receptor 56;GPR56 N-terminal fragment;GPR56 C-terminal fragment	GPR56	ENSP00000457456_p.V219G;ENSP00000457456_p.S281R;ENSP00000457456_p.Q306H;ENSP00000457456_p.V219G;ENSP00000457456_p.S281R;ENSP00000457456_p.Q306H;ENSP00000456620_p.V219G;ENSP00000456620_p.S281R;ENSP00000456620_p.Q306H;ENSP00000456620_p.V219G;ENSP00000456620_p.S281R;ENSP00000456620_p.Q306H;ENSP00000455351_p.V219G;ENSP00000455351_p.S281R;ENSP00000455351_p.Q306H;ENSP00000455351_p.V219G;ENSP00000455351…	Unspecific	7.72734	9.06006	4.42719	9.07979	3.49761e-05	+			19;19;19;19;19;19;19;19;19;19;19;19;19;19;19;19;19;19;19;19;19;19;19;19;19;19;19;19;19;19;19;19;19;19;19;15;14;14;10;10;10;10;7;7;7;7;6;6;6;6;6;5;5;5;5;5;5;5;5;5;5;5;5;5;5;5;5;5;5;5;5;5;5;5;5;5;5;5;5;5;5;5;5;5;5;5;3;3;3;3;3;3;3;3;3;3;3;3;3;3;3;3;3;3;3;3;3;3;3;3;3;3;3;2;2;2;2;2;2;2;2;1;1;1;1;1;1	19;19;19;19;19;19;19;19;19;19;19;19;19;19;19;19;19;19;19;19;19;19;19;19;19;19;19;19;19;19;19;19;19;19;19;15;14;14;10;10;10;10;7;7;7;7;6;6;6;6;6;5;5;5;5;5;5;5;5;5;5;5;5;5;5;5;5;5;5;5;5;5;5;5;5;5;5;5;5;5;5;5;5;5;5;5;3;3;3;3;3;3;3;3;3;3;3;3;3;3;3;3;3;3;3;3;3;3;3;3;3;3;3;2;2;2;2;2;2;2;2;1;1;1;1;1;1	14;14;14;14;14;14;14;14;14;14;14;14;14;14;14;14;14;14;14;14;14;14;14;14;14;14;14;14;14;14;14;14;14;14;14;12;11;11;8;8;8;7;5;5;5;5;6;6;6;6;6;3;3;3;3;3;3;3;3;3;3;3;3;3;3;3;3;3;3;3;3;3;3;3;3;3;3;3;3;3;3;3;3;3;3;3;1;1;1;1;1;1;1;1;1;1;1;1;1;1;1;1;1;1;1;1;1;1;1;1;1;1;1;0;0;0;0;2;2;2;2;0;0;0;0;0;0
13675	ENSP00000373489;ENSP00000373487;P05783	ENSP00000373489;ENSP00000373487;P05783	Keratin, type I cytoskeletal 18	KRT18		Unspecific	8.68611	7.33485	-4.48881	8.70504	0.000201653	+	Estrogen signaling pathway;Staphylococcus aureus infection	Developmental Biology;Formation of the cornified envelope;Keratinization	39;39;39	37;37;37	2;2;2
13690	ENSP00000373808;Q9Y6X4;ENSP00000424578;D6RB01;ENSP00000423883;D6RC41;ENSP00000423631;D6R953;Q5XG69	ENSP00000373808;Q9Y6X4;ENSP00000424578;D6RB01	Soluble lamin-associated protein of 75 kDa	FAM169A		Unspecific	6.1944	8.01766	6.05674	8.02414	0.000109239	+			19;19;18;18;4;4;4;4;4	19;19;18;18;4;4;4;4;4	19;19;18;18;4;4;4;4;4
13719	LRG_143p2_p.T1982I;LRG_143p2_p.T1491K;LRG_143p2_p.T1490K;LRG_143p2_p.S1489K;LRG_143p2_p.M3161L;LRG_143p2_p.E1492K;LRG_143p2;LRG_143p1_p.T1982I;LRG_143p1_p.T1491K;LRG_143p1_p.T1490K;LRG_143p1_p.S1489K;LRG_143p1_p.M3161L;LRG_143p1_p.E1492K;LRG_143p1;ENSP00000374443_p.T1982I;ENSP00000374443_p.T1491K;ENSP00000374443_p.T1490K;ENSP00000374443_p.S1489K;ENSP00000374443_p.M3161L;ENSP00000374443_p.E1492K;E…	LRG_143p2_p.T1982I;LRG_143p2_p.T1491K;LRG_143p2_p.T1490K;LRG_143p2_p.S1489K;LRG_143p2_p.M3161L;LRG_143p2_p.E1492K;LRG_143p2;LRG_143p1_p.T1982I;LRG_143p1_p.T1491K;LRG_143p1_p.T1490K;LRG_143p1_p.S1489K;LRG_143p1_p.M3161L;LRG_143p1_p.E1492K;LRG_143p1;ENSP00000374443_p.T1982I;ENSP00000374443_p.T1491K;ENSP00000374443_p.T1490K;ENSP00000374443_p.S1489K;ENSP00000374443_p.M3161L;ENSP00000374443_p.E1492K;E…	Lysosomal-trafficking regulator	LYST	LRG_143p2_p.T1982I;LRG_143p2_p.T1491K;LRG_143p2_p.T1490K;LRG_143p2_p.S1489K;LRG_143p2_p.M3161L;LRG_143p2_p.E1492K;LRG_143p2_p.T1982I;LRG_143p2_p.M3161L;LRG_143p2_p.E1492K;LRG_143p2_p.T1491K;LRG_143p2_p.T1490K;LRG_143p2_p.S1489K;LRG_143p1_p.T1982I;LRG_143p1_p.T1491K;LRG_143p1_p.T1490K;LRG_143p1_p.S1489K;LRG_143p1_p.M3161L;LRG_143p1_p.E1492K;LRG_143p1_p.T1982I;LRG_143p1_p.M3161L;LRG_143p1_p.E1492K;…	Unspecific	8.24543	9.24073	3.30633	9.28255	0.000796525	+			128;128;128;128;128;128;128;128;128;128;128;128;128;128;128;128;128;128;128;128;128;128;60;44;44;44;5;5;5	128;128;128;128;128;128;128;128;128;128;128;128;128;128;128;128;128;128;128;128;128;128;60;44;44;44;5;5;5	87;87;87;87;87;87;87;87;87;87;87;87;87;87;87;87;87;87;87;87;87;87;51;36;36;36;3;3;3
13777	ENSP00000398210_p.C729R;ENSP00000375899_p.C756R;ENSP00000398210_p.E489K;ENSP00000398210;ENSP00000375899_p.E516K;ENSP00000375899;Q13342-5;Q13342;ENSP00000398210_p.E824K;ENSP00000375899_p.E851K;ENSP00000342096_p.C696R;ENSP00000342096_p.E456K;ENSP00000342096;Q13342-6;ENSP00000342096_p.E791K;Q13342-2;ENSP00000362749;Q13342-4;U3KPV9;ENSP00000475284	ENSP00000398210_p.C729R;ENSP00000375899_p.C756R;ENSP00000398210_p.E489K;ENSP00000398210;ENSP00000375899_p.E516K;ENSP00000375899;Q13342-5;Q13342;ENSP00000398210_p.E824K;ENSP00000375899_p.E851K;ENSP00000342096_p.C696R;ENSP00000342096_p.E456K;ENSP00000342096;Q13342-6;ENSP00000342096_p.E791K	Nuclear body protein SP140	SP140	ENSP00000398210_p.C729R;ENSP00000375899_p.C756R;ENSP00000398210_p.E489K;ENSP00000398210_p.C729R;ENSP00000398210_p.E824K;ENSP00000398210_p.E489K;ENSP00000375899_p.E516K;ENSP00000375899_p.C756R;ENSP00000375899_p.E851K;ENSP00000375899_p.E516K;;;ENSP00000398210_p.E824K;ENSP00000375899_p.E851K;ENSP00000342096_p.C696R;ENSP00000342096_p.E456K;ENSP00000342096_p.C696R;ENSP00000342096_p.E791K;ENSP000003420…	Alt	8.76953	6.58409	-7.25987	8.77235	3.68802e-09	+			39;39;38;38;38;38;38;38;37;37;36;35;35;35;34;15;7;7;1;1	38;38;37;37;37;37;37;37;36;36;35;34;34;34;33;15;7;7;1;1	5;5;5;5;5;5;5;5;5;5;2;2;2;2;2;4;0;0;0;0
13819	ENSP00000407726_p.S499I;ENSP00000407726_p.R506K;ENSP00000407726_p.P781S;ENSP00000407726;ENSP00000376504_p.S499I;ENSP00000376504_p.R506K;ENSP00000376504_p.P781S;ENSP00000376504;O00534;ENSP00000404683;ENSP00000355070;ENSP00000376501;B4DHS6;O00534-3;O00534-2;O00534-4	ENSP00000407726_p.S499I;ENSP00000407726_p.R506K;ENSP00000407726_p.P781S;ENSP00000407726;ENSP00000376504_p.S499I;ENSP00000376504_p.R506K;ENSP00000376504_p.P781S;ENSP00000376504;O00534	von Willebrand factor A domain-containing protein 5A	VWA5A	ENSP00000407726_p.S499I;ENSP00000407726_p.R506K;ENSP00000407726_p.P781S;ENSP00000407726_p.S499I;ENSP00000407726_p.R506K;ENSP00000407726_p.P781S;ENSP00000376504_p.S499I;ENSP00000376504_p.R506K;ENSP00000376504_p.P781S;ENSP00000376504_p.S499I;ENSP00000376504_p.R506K;ENSP00000376504_p.P781S;;;;;;;;	Unspecific	8.14843	6.30961	-6.10844	8.15468	0.000146339	+			27;27;27;27;27;27;27;27;27;13;13;13;13;13;13;10	21;21;21;21;21;21;21;21;21;11;11;11;11;11;11;8	21;21;21;21;21;21;21;21;21;11;11;11;11;11;11;8
13877	ENSP00000377303;P51606;ENSP00000359014;A6NKZ2;P51606-2;H7C1A7;ENSP00000399278;ENSP00000405759;H7C2G7;H7C317;ENSP00000409034	ENSP00000377303;P51606;ENSP00000359014;A6NKZ2;P51606-2	N-acylglucosamine 2-epimerase	RENBP		Unspecific	8.36783	9.47539	3.67924	9.50804	0.000601292	+	Amino sugar and nucleotide sugar metabolism;Metabolic pathways	Asparagine N-linked glycosylation;Biosynthesis of the N-glycan precursor (dolichol lipid-linked oligosaccharide, LLO) and transfer to a nascent protein;Metabolism of proteins;Post-translational protein modification;Synthesis of substrates in N-glycan biosythesis;Synthesis of UDP-N-acetyl-glucosamine	25;25;22;22;14;7;7;3;3;2;2	25;25;22;22;14;7;7;3;3;2;2	17;17;16;16;9;4;4;3;3;1;1
13881	ENSP00000377380_p.S370A;ENSP00000377380;Q9BRR9-2;ENSP00000394307_p.S370A;ENSP00000394307;R4GN15;ENSP00000473445_p.S370A;ENSP00000473445;ENSP00000377380_p.S450F;ENSP00000377386_p.T449A;ENSP00000377386_p.S370A;ENSP00000377386;Q9BRR9-5;Q9BRR9;ENSP00000394307_p.S450F;ENSP00000473445_p.S450F;ENSP00000377386_p.S469F;ENSP00000397950_p.S186A;ENSP00000397950;ENSP00000377380_p.R559L;Q9BRR9-4;ENSP0000039795…	ENSP00000377380_p.S370A;ENSP00000377380;Q9BRR9-2;ENSP00000394307_p.S370A;ENSP00000394307;R4GN15;ENSP00000473445_p.S370A;ENSP00000473445;ENSP00000377380_p.S450F;ENSP00000377386_p.T449A;ENSP00000377386_p.S370A;ENSP00000377386;Q9BRR9-5;Q9BRR9;ENSP00000394307_p.S450F;ENSP00000473445_p.S450F;ENSP00000377386_p.S469F;ENSP00000397950_p.S186A;ENSP00000397950;ENSP00000377380_p.R559L;Q9BRR9-4;ENSP0000039795…	Rho GTPase-activating protein 9	ARHGAP9	ENSP00000377380_p.S370A;ENSP00000377380_p.R559L;ENSP00000377380_p.S450F;ENSP00000377380_p.S370A;;ENSP00000394307_p.S370A;ENSP00000394307_p.R559L;ENSP00000394307_p.S450F;ENSP00000394307_p.S370A;;ENSP00000473445_p.S370A;ENSP00000473445_p.R559L;ENSP00000473445_p.S450F;ENSP00000473445_p.S370A;ENSP00000377380_p.S450F;ENSP00000377386_p.T449A;ENSP00000377386_p.S370A;ENSP00000377386_p.R578L;ENSP000003773…	Ref	8.48231	6.59706	-6.26264	8.48793	1.59697e-08	+		Immune System;Innate Immune System;Neutrophil degranulation;Rho GTPase cycle;Signal Transduction;Signaling by Rho GTPases	22;22;22;21;21;21;21;21;21;21;21;21;21;21;20;20;20;19;19;19;19;18;18;18;18;18;16;9;9;8;8;8;7;6;5;4;4;4;4;4;4;4;4;4;4;2;2;2	22;22;22;21;21;21;21;21;21;21;21;21;21;21;20;20;20;19;19;19;19;18;18;18;18;18;16;9;9;8;8;8;7;6;5;4;4;4;4;4;4;4;4;4;4;2;2;2	0;0;0;0;0;0;0;0;0;0;0;0;0;0;0;0;0;0;0;0;0;0;0;0;0;0;0;0;0;0;0;0;0;0;0;0;0;0;0;0;0;0;0;0;0;0;0;0
13909	Q13642-1;ENSP00000499016;ENSP00000487147;ENSP00000486782;ENSP00000486439;ENSP00000485897;ENSP00000444815;ENSP00000443333;ENSP00000377709;Q5JXI8;ENSP00000359708;ENSP00000498503;A0A494C0D6;Q5JXH8;ENSP00000391779;Q5JXH7;ENSP00000412642;Q5JXI3;ENSP00000413798;ENSP00000408038;ENSP00000487030;A0A0D9SFZ9;ENSP00000486631;A0A0D9SFI6;ENSP00000486436;A0A0D9SFB0;Q5JXH9;ENSP00000389920;ENSP00000487318;A0A0D9S…	Q13642-1;ENSP00000499016;ENSP00000487147;ENSP00000486782;ENSP00000486439;ENSP00000485897;ENSP00000444815;ENSP00000443333;ENSP00000377709;Q5JXI8;ENSP00000359708;ENSP00000498503;A0A494C0D6;Q5JXH8;ENSP00000391779;Q5JXH7;ENSP00000412642;Q5JXI3;ENSP00000413798;ENSP00000408038;ENSP00000487030;A0A0D9SFZ9;ENSP00000486631;A0A0D9SFI6;ENSP00000486436;A0A0D9SFB0;Q5JXH9;ENSP00000389920;ENSP00000487318;A0A0D9S…		FHL1		Unspecific	8.9426	6.17736	-9.18593	8.94335	5.35686e-21	+	African trypanosomiasis;Allograft rejection;alpha-Linolenic acid metabolism;Aminoacyl-tRNA biosynthesis;Amoebiasis;Antigen processing and presentation;Arachidonic acid metabolism;Arginine and proline metabolism;Asthma;Autoimmune thyroid disease;B cell receptor signaling pathway;beta-Alanine metabolism;Calcium signaling pathway;Cell adhesion molecules (CAMs);Chemical carcinogenesis;Cholesterol met…		25;25;25;25;25;25;25;25;25;19;19;17;17;16;16;16;16;16;16;16;15;15;14;14;14;14;14;14;13;13;13;13;9;9;9;9;8;8;6;6;5;5	11;11;11;11;11;11;11;11;11;9;9;9;9;9;9;9;9;9;9;9;8;8;8;8;8;8;8;8;8;8;8;8;6;6;6;6;5;5;3;3;2;2	0;0;0;0;0;0;0;0;0;0;0;0;0;0;0;0;0;0;0;0;0;0;0;0;0;0;0;0;0;0;0;0;0;0;0;0;0;0;0;0;0;0
13910	ENSP00000417376_p.I113M;ENSP00000377717_p.I113M;ENSP00000480884_p.I166M;ENSP00000417376_p.M1R;ENSP00000417376_p.A311T;ENSP00000417376;ENSP00000377717_p.M1R;ENSP00000377717_p.A311T;ENSP00000377717;ENSP00000480884_p.M54R;ENSP00000480884_p.A364T;ENSP00000480884;A0A087WXB8;Q9Y274;ENSP00000417201_p.I136M;ENSP00000418896_p.I113M;ENSP00000417201_p.M24R;ENSP00000417201;C9J480;ENSP00000418650_p.M1R;ENSP00…	ENSP00000417376_p.I113M;ENSP00000377717_p.I113M;ENSP00000480884_p.I166M;ENSP00000417376_p.M1R;ENSP00000417376_p.A311T;ENSP00000417376;ENSP00000377717_p.M1R;ENSP00000377717_p.A311T;ENSP00000377717;ENSP00000480884_p.M54R;ENSP00000480884_p.A364T;ENSP00000480884;A0A087WXB8;Q9Y274;ENSP00000417201_p.I136M;ENSP00000418896_p.I113M;ENSP00000417201_p.M24R;ENSP00000417201;C9J480;ENSP00000418650_p.M1R;ENSP00…	Type 2 lactosamine alpha-2,3-sialyltransferase	ST3GAL6	ENSP00000417376_p.I113M;ENSP00000377717_p.I113M;ENSP00000480884_p.I166M;ENSP00000417376_p.M1R;ENSP00000417376_p.A311T;ENSP00000417376_p.I113M;ENSP00000417376_p.M1R;ENSP00000417376_p.A311T;ENSP00000377717_p.M1R;ENSP00000377717_p.A311T;ENSP00000377717_p.I113M;ENSP00000377717_p.M1R;ENSP00000377717_p.A311T;ENSP00000480884_p.M54R;ENSP00000480884_p.A364T;ENSP00000480884_p.I166M;ENSP00000480884_p.M54R;E…	Alt	6.53893	8.20441	5.53261	8.21369	0.000194814	+	Glycosphingolipid biosynthesis - lacto and neolacto series;Metabolic pathways	Asparagine N-linked glycosylation;Biosynthesis of the N-glycan precursor (dolichol lipid-linked oligosaccharide, LLO) and transfer to a nascent protein;Blood group systems biosynthesis;Glycosaminoglycan metabolism;Keratan sulfate biosynthesis;Keratan sulfate/keratin metabolism;Lewis blood group biosynthesis;Metabolism;Metabolism of carbohydrates;Metabolism of proteins;Post-translational protein m…	14;14;14;13;13;13;13;13;13;13;13;13;13;13;11;10;10;10;10;9;9;9;9;9;9;8;7;7;6;6;6;6;6;6;6;5;5;5;5;5;5;5;5;5;5;5	14;14;14;13;13;13;13;13;13;13;13;13;13;13;11;10;10;10;10;9;9;9;9;9;9;8;7;7;6;6;6;6;6;6;6;5;5;5;5;5;5;5;5;5;5;5	13;13;13;12;12;12;12;12;12;12;12;12;12;12;10;9;9;9;9;9;9;9;8;8;8;7;6;6;5;6;6;6;6;6;6;5;5;5;5;5;5;5;5;5;4;4
13983	ENSP00000378512;O60711;ENSP00000431284;O60711-2;ENSP00000461855;B7Z5P7;ENSP00000437094;E9PNX9	ENSP00000378512;O60711;ENSP00000431284;O60711-2;ENSP00000461855;B7Z5P7	Leupaxin	LPXN		Unspecific	8.71193	6.88274	-6.07645	8.71832	6.82333e-07	+			15;15;13;13;12;12;4;4	10;10;10;10;9;9;2;2	10;10;10;10;9;9;2;2
14029	ENSP00000477370;ENSP00000379330;Q13469-4;Q13469;ENSP00000477370_p.P327Q;ENSP00000379330_p.P347Q;ENSP00000477370_p.P35L;ENSP00000379330_p.P55L;ENSP00000396471;ENSP00000360619;Q13469-3;Q13469-2;ENSP00000396471_p.P327Q;ENSP00000360619_p.P347Q;ENSP00000396471_p.P35L;ENSP00000360619_p.P55L;ENSP00000477342;ENSP00000477142;Q13469-5;ENSP00000477342_p.P128Q;ENSP00000477142_p.P128Q	ENSP00000477370;ENSP00000379330;Q13469-4;Q13469;ENSP00000477370_p.P327Q;ENSP00000379330_p.P347Q;ENSP00000477370_p.P35L;ENSP00000379330_p.P55L;ENSP00000396471;ENSP00000360619;Q13469-3;Q13469-2;ENSP00000396471_p.P327Q;ENSP00000360619_p.P347Q;ENSP00000396471_p.P35L;ENSP00000360619_p.P55L;ENSP00000477342;ENSP00000477142;Q13469-5;ENSP00000477342_p.P128Q;ENSP00000477142_p.P128Q	Nuclear factor of activated T-cells, cytoplasmic 2	NFATC2	ENSP00000477370_p.P327Q;ENSP00000477370_p.P35L;ENSP00000379330_p.P347Q;ENSP00000379330_p.P55L;;;ENSP00000477370_p.P327Q;ENSP00000379330_p.P347Q;ENSP00000477370_p.P35L;ENSP00000379330_p.P55L;ENSP00000396471_p.P327Q;ENSP00000396471_p.P35L;ENSP00000360619_p.P347Q;ENSP00000360619_p.P55L;;;ENSP00000396471_p.P327Q;ENSP00000360619_p.P347Q;ENSP00000396471_p.P35L;ENSP00000360619_p.P55L;ENSP00000477342_p.P…	Ref	8.56861	5.98177	-8.59329	8.56974	3.59871e-13	+	Axon guidance;B cell receptor signaling pathway;Cellular senescence;cGMP-PKG signaling pathway;C-type lectin receptor signaling pathway;Hepatitis B;Human cytomegalovirus infection;Human immunodeficiency virus 1 infection;Human T-cell leukemia virus 1 infection;Kaposi sarcoma-associated herpesvirus infection;Natural killer cell mediated cytotoxicity;Osteoclast differentiation;Oxytocin signaling pa…	Adaptive Immune System;Calcineurin activates NFAT;CLEC7A (Dectin-1) induces NFAT activation;CLEC7A (Dectin-1) signaling;C-type lectin receptors (CLRs);Downstream signaling events of B Cell Receptor (BCR);Fc epsilon receptor (FCERI) signaling;FCERI mediated Ca+2 mobilization;Gene expression (Transcription);Generic Transcription Pathway;Immune System;Innate Immune System;RNA Polymerase II Transcrip…	40;40;40;40;39;39;38;38;37;37;37;37;36;36;35;35;29;29;29;28;28	40;40;40;40;39;39;38;38;37;37;37;37;36;36;35;35;29;29;29;28;28	20;20;20;20;19;19;18;18;19;19;19;19;18;18;17;17;11;11;11;10;10
14130	ENSP00000380880;Q8N2U9;ENSP00000350188;Q8N2U9-2;K7ERV4;ENSP00000468427;ENSP00000465546;K7EMG2;ENSP00000466491;Q8N2U9-3	ENSP00000380880;Q8N2U9;ENSP00000350188;Q8N2U9-2	PQ-loop repeat-containing protein 1	PQLC1		Unspecific	6.60426	8.21775	5.35988	8.2282	0.000312179	+			5;5;4;4;2;2;1;1;1;1	5;5;4;4;2;2;1;1;1;1	5;5;4;4;2;2;1;1;1;1
14179	ENSP00000410523;ENSP00000381601;ENSP00000381599;P20591;F8W8T1;ENSP00000288383;ENSP00000478441;P20591-2;H9KVC7;ENSP00000400923;H9KVC9;ENSP00000402215;H9KVD0;ENSP00000408498;H9KVC4;ENSP00000393931;H9KVD3;ENSP00000410989;H9KVC3;ENSP00000392151	ENSP00000410523;ENSP00000381601;ENSP00000381599;P20591;F8W8T1;ENSP00000288383;ENSP00000478441;P20591-2	Interferon-induced GTP-binding protein Mx1;Interferon-induced GTP-binding protein Mx1, N-terminally processed	MX1	ENSP00000410523_p.V379I;ENSP00000381601_p.V379I;ENSP00000381599_p.V379I;;;ENSP00000288383_p.V356I;ENSP00000478441_p.V379I;;;;;;;;;;;;;	Alt+Ref	10.1682	9.38101	-2.61507	10.2339	5.92153e-05	+	Hepatitis C;Human papillomavirus infection;Influenza A;Measles	Antiviral mechanism by IFN-stimulated genes;Cytokine Signaling in Immune system;Immune System;Interferon alpha/beta signaling;Interferon Signaling;ISG15 antiviral mechanism	52;52;52;52;50;50;38;38;17;17;17;17;7;7;7;7;4;4;2;2	52;52;52;52;50;50;38;38;17;17;17;17;7;7;7;7;4;4;2;2	1;1;1;1;1;1;1;1;0;0;0;0;0;0;0;0;0;0;0;0
14246	ENSP00000383411;Q9NSI8;ENSP00000383409;Q9NSI8-2	ENSP00000383411;Q9NSI8	SAM domain-containing protein SAMSN-1	SAMSN1		Unspecific	8.61221	6.25232	-7.83938	8.6141	2.83473e-11	+			20;20;9;9	19;19;9;9	1;1;1;1
14269	ENSP00000384081;Q9Y2G0;ENSP00000386082;ENSP00000385832;E7ESK9;Q9Y2G0-3;H7BXG9;ENSP00000264719;ENSP00000384454;Q9Y2G0-2;Q6ZQ18-2;Q6ZQ18;A0A1W2P7T9	ENSP00000384081;Q9Y2G0;ENSP00000386082;ENSP00000385832;E7ESK9;Q9Y2G0-3;H7BXG9;ENSP00000264719;ENSP00000384454;Q9Y2G0-2;Q6ZQ18-2;Q6ZQ18;A0A1W2P7T9	Protein EFR3 homolog B	EFR3B;Efr3b		Unspecific	5.92996	8.19928	7.53853	8.20161	2.9444e-07	+			23;23;21;21;21;21;19;19;18;18;16;16;12	22;22;20;20;20;20;18;18;18;18;15;15;11	22;22;20;20;20;20;18;18;18;18;15;15;11
14311	ENSP00000384886_p.R76Q;ENSP00000384886;P13284;M0QZG3;ENSP00000470527_p.R76Q;ENSP00000470527	ENSP00000384886_p.R76Q;ENSP00000384886;P13284	Gamma-interferon-inducible lysosomal thiol reductase	IFI30	ENSP00000384886_p.R76Q;ENSP00000384886_p.R76Q;;;ENSP00000470527_p.R76Q;ENSP00000470527_p.R76Q	Unspecific	9.21768	7.87348	-4.46534	9.23691	1.67481e-06	+	Antigen processing and presentation	Adaptive Immune System;Cytokine Signaling in Immune system;Immune System;Interferon gamma signaling;Interferon Signaling;MHC class II antigen presentation	6;6;6;1;1;1	6;6;6;1;1;1	6;6;6;1;1;1
14322	ENSP00000385057;Q9HC16;ENSP00000385057_p.Q275E;Q9HC16-3;ENSP00000370977_p.A78V;ENSP00000370977;Q8IUX4-2;Q8IUX4-3	ENSP00000385057;Q9HC16;ENSP00000385057_p.Q275E	DNA dC->dU-editing enzyme APOBEC-3G	APOBEC3G	ENSP00000385057_p.Q275E;;ENSP00000385057_p.Q275E;;ENSP00000370977_p.A78V;ENSP00000370977_p.A78V;;	Ref	8.96927	7.04319	-6.39831	8.97439	3.20566e-11	+	Human immunodeficiency virus 1 infection	APOBEC3G mediated resistance to HIV-1 infection;Disease;HIV Infection;Host Interactions of HIV factors;Infectious disease;Vif-mediated degradation of APOBEC3G	22;22;21;4;3;3;3;3	22;22;21;4;3;3;3;3	19;19;18;1;0;0;0;0
14337	ENSP00000385575_p.A357P;ENSP00000385575;P58335-4;ENSP00000306185_p.A357P;ENSP00000306185;P58335;J3KPY9;ENSP00000384028_p.A280P;ENSP00000384028;ENSP00000314883_p.A254P;ENSP00000314883;P58335-2;P58335-3;ENSP00000413700;A0A0C4DG84	ENSP00000385575_p.A357P;ENSP00000385575;P58335-4;ENSP00000306185_p.A357P;ENSP00000306185;P58335;J3KPY9;ENSP00000384028_p.A280P;ENSP00000384028;ENSP00000314883_p.A254P;ENSP00000314883;P58335-2;P58335-3;ENSP00000413700;A0A0C4DG84	Anthrax toxin receptor 2	ANTXR2	ENSP00000385575_p.A357P;ENSP00000385575_p.A357P;;ENSP00000306185_p.A357P;ENSP00000306185_p.A357P;;;ENSP00000384028_p.A280P;ENSP00000384028_p.A280P;ENSP00000314883_p.A254P;ENSP00000314883_p.A254P;;;;	Unspecific	7.21829	8.64922	4.75348	8.66503	0.000385854	+	NOD-like receptor signaling pathway	Disease;Infectious disease;Uptake and actions of bacterial toxins;Uptake and function of anthrax toxins	15;15;15;14;14;14;13;13;13;12;12;12;10;8;8	15;15;15;14;14;14;13;13;13;12;12;12;10;8;8	9;9;9;9;9;9;9;9;9;7;7;7;7;7;7
14369	ENSP00000386229;O43566	ENSP00000386229;O43566	Regulator of G-protein signaling 14	RGS14		Unspecific	8.09476	5.81671	-7.56755	8.09705	2.3636e-05	+	Rap1 signaling pathway	G alpha (i) signalling events;GPCR downstream signalling;Signal Transduction;Signaling by GPCR	28;28	20;20	2;2
14523	ENSP00000427931_p.R847L;ENSP00000427931;ENSP00000391995_p.R847L;ENSP00000391995;Q14289-2;ENSP00000427931_p.G414R;ENSP00000391995_p.G414R;ENSP00000427931_p.R10L;ENSP00000391995_p.R10L;ENSP00000427931_p.K796T;ENSP00000391995_p.K796T	ENSP00000427931_p.R847L;ENSP00000427931;ENSP00000391995_p.R847L;ENSP00000391995;Q14289-2;ENSP00000427931_p.G414R;ENSP00000391995_p.G414R;ENSP00000427931_p.R10L;ENSP00000391995_p.R10L;ENSP00000427931_p.K796T;ENSP00000391995_p.K796T	Protein-tyrosine kinase 2-beta	PTK2B	ENSP00000427931_p.R847L;ENSP00000427931_p.G414R;ENSP00000427931_p.K796T;ENSP00000427931_p.R10L;ENSP00000427931_p.R847L;ENSP00000391995_p.R847L;ENSP00000391995_p.G414R;ENSP00000391995_p.K796T;ENSP00000391995_p.R10L;ENSP00000391995_p.R847L;;ENSP00000427931_p.G414R;ENSP00000391995_p.G414R;ENSP00000427931_p.R10L;ENSP00000391995_p.R10L;ENSP00000427931_p.K796T;ENSP00000391995_p.K796T	Ref	9.12387	7.71189	-4.6905	9.14037	4.26386e-09	+	Calcium signaling pathway;Chemokine signaling pathway;GnRH signaling pathway;Hepatitis B;Human cytomegalovirus infection;Human immunodeficiency virus 1 infection;Leukocyte transendothelial migration;Natural killer cell mediated cytotoxicity;Phospholipase D signaling pathway;Yersinia infection	Cell-Cell communication;Cytokine Signaling in Immune system;Immune System;Interleukin-2 family signaling;Interleukin-2 signaling;Signal regulatory protein family interactions;Signal Transduction;Signaling by Interleukins;Signaling by Receptor Tyrosine Kinases;Signaling by VEGF;VEGFA-VEGFR2 Pathway	65;65;65;65;65;64;64;64;64;62;62	65;65;65;65;65;64;64;64;64;62;62	2;2;2;2;2;2;2;2;2;2;2
14570	ENSP00000393621;Q05682-5;ENSP00000407522;E9PGZ1	ENSP00000393621;Q05682-5;ENSP00000407522;E9PGZ1	Caldesmon	CALD1		Unspecific	7.54742	8.88297	4.43657	8.90257	1.9611e-05	+	Vascular smooth muscle contraction	Muscle contraction;Smooth Muscle Contraction	66;66;61;61	7;7;7;7	0;0;0;0
14606	LRG_196p1_p.S887L;LRG_196p1_p.P97T;LRG_196p1_p.N413S;LRG_196p1;ENSP00000394888_p.S887L;ENSP00000394888_p.P97T;ENSP00000394888_p.N413S;ENSP00000394888;Q8NF50;LRG_196p1_p.E917K;ENSP00000394888_p.E917K;Q8NF50-2;ENSP00000408464_p.S819L;ENSP00000408464_p.P29T;ENSP00000408464_p.N345S;ENSP00000408464;Q8NF50-3;ENSP00000408464_p.E849K;ENSP00000419438_p.S819L;ENSP00000419438_p.P29T;ENSP00000419438_p.N345S;…	LRG_196p1_p.S887L;LRG_196p1_p.P97T;LRG_196p1_p.N413S;LRG_196p1;ENSP00000394888_p.S887L;ENSP00000394888_p.P97T;ENSP00000394888_p.N413S;ENSP00000394888;Q8NF50;LRG_196p1_p.E917K;ENSP00000394888_p.E917K;Q8NF50-2;ENSP00000408464_p.S819L;ENSP00000408464_p.P29T;ENSP00000408464_p.N345S;ENSP00000408464;Q8NF50-3;ENSP00000408464_p.E849K;ENSP00000419438_p.S819L;ENSP00000419438_p.P29T;ENSP00000419438_p.N345S;…	Dedicator of cytokinesis protein 8	DOCK8	LRG_196p1_p.S887L;LRG_196p1_p.P97T;LRG_196p1_p.N413S;LRG_196p1_p.A22V;LRG_196p1_p.A597V;LRG_196p1_p.E917K;LRG_196p1_p.P97T;LRG_196p1_p.N413S;LRG_196p1_p.S887L;ENSP00000394888_p.S887L;ENSP00000394888_p.P97T;ENSP00000394888_p.N413S;ENSP00000394888_p.A22V;ENSP00000394888_p.A597V;ENSP00000394888_p.E917K;ENSP00000394888_p.P97T;ENSP00000394888_p.N413S;ENSP00000394888_p.S887L;;LRG_196p1_p.E917K;ENSP0000…	Alt+Ref	9.27727	7.99908	-4.24605	9.29957	1.41544e-07	+		Factors involved in megakaryocyte development and platelet production;Hemostasis	97;97;97;97;97;97;97;97;97;96;96;95;94;94;94;94;94;93;92;92;92;92;92;91	94;94;94;94;94;94;94;94;94;93;93;92;91;91;91;91;91;90;89;89;89;89;89;88	0;0;0;0;0;0;0;0;0;0;0;0;0;0;0;0;0;0;0;0;0;0;0;0
14708	ENSP00000399168_p.D138N;ENSP00000491291_p.D138N;ENSP00000405931_p.D149N	ENSP00000399168_p.D138N;ENSP00000491291_p.D138N;ENSP00000405931_p.D149N			ENSP00000399168_p.D138N;ENSP00000491291_p.D138N;ENSP00000405931_p.D149N	Alt	9.76014	8.42888	-4.42233	9.77993	4.07085e-09	+			22;21;15	9;8;6	0;0;0
14756	ENSP00000401508;Q6XQN6;Q6XQN6-2;ENSP00000390949;G5E977;ENSP00000341136_p.A554S;ENSP00000341136;Q6XQN6-3;ENSP00000405670;C9J8U2;ENSP00000437102;H0YF31;ENSP00000433245;H0YDA6;ENSP00000478911_p.A200S;ENSP00000478911;A0A087WUT5	ENSP00000401508;Q6XQN6;Q6XQN6-2;ENSP00000390949;G5E977;ENSP00000341136_p.A554S;ENSP00000341136;Q6XQN6-3;ENSP00000405670;C9J8U2	Nicotinate phosphoribosyltransferase	NAPRT	;;;;;ENSP00000341136_p.A554S;ENSP00000341136_p.A554S;;;;;;;;ENSP00000478911_p.A200S;ENSP00000478911_p.A200S;	Unspecific	8.89224	9.82741	3.10655	9.87511	0.000922212	+	Metabolic pathways;Nicotinate and nicotinamide metabolism	Immune System;Innate Immune System;Metabolism;Metabolism of vitamins and cofactors;Metabolism of water-soluble vitamins and cofactors;Neutrophil degranulation;Nicotinamide salvaging;Nicotinate metabolism	43;43;41;40;40;40;40;40;38;38;16;14;9;9;9;9;9	43;43;41;40;40;40;40;40;38;38;16;14;9;9;9;9;9	33;33;31;31;30;30;30;31;28;28;12;10;5;5;6;6;6
14775	ENSP00000449690;ENSP00000448828;ENSP00000447374;ENSP00000402758;P40967-4;P40967-5;P40967;P40967-2;ENSP00000450036;P40967-3;ENSP00000449520;H0YIJ2;F8W1D1;ENSP00000446662;F8VUB1;ENSP00000448029;F8VZC6;ENSP00000447732;F8VYZ1;ENSP00000448871;F8VZV2;ENSP00000446633;A0A1W2P7H5	ENSP00000449690;ENSP00000448828;ENSP00000447374;ENSP00000402758;P40967-4;P40967-5;P40967;P40967-2;ENSP00000450036;P40967-3;ENSP00000449520;H0YIJ2;F8W1D1;ENSP00000446662	Melanocyte protein PMEL;M-alpha;M-beta	PMEL		Unspecific	7.3282	10.3088	9.90128	10.3092	2.75685e-51	+			20;20;20;20;20;20;20;20;16;16;13;13;12;12;8;8;8;8;4;4;4;4;2	20;20;20;20;20;20;20;20;16;16;13;13;12;12;8;8;8;8;4;4;4;4;2	10;10;10;10;10;10;10;10;10;10;7;7;5;5;5;5;0;0;0;0;0;0;0
14789	ENSP00000403802;Q9UK96;Q7TQF2;Q9UK96-2;J3KN78;ENSP00000276960;F6Q7Q7;F5GXN9;ENSP00000440061	ENSP00000403802;Q9UK96;Q7TQF2;Q9UK96-2;J3KN78;ENSP00000276960;F6Q7Q7	F-box only protein 10	FBXO10;Fbxo10		Unspecific	6.14783	8.37309	7.39214	8.37566	2.49353e-06	+		Adaptive Immune System;Antigen processing: Ubiquitination & Proteasome degradation;Class I MHC mediated antigen processing & presentation;Immune System;Metabolism of proteins;Neddylation;Post-translational protein modification	28;28;21;17;15;15;15;2;2	28;28;21;17;15;15;15;2;2	28;28;21;17;15;15;15;2;2
14798	ENSP00000491865;ENSP00000483811_p.E19Q;ENSP00000416249;ENSP00000409832_p.P16R;ENSP00000404123;P0CL82;P0CL81;P0CL80;O76087;ENSP00000416249_p.Y9C;ENSP00000416249_p.R13S	ENSP00000491865;ENSP00000483811_p.E19Q;ENSP00000416249;ENSP00000409832_p.P16R;ENSP00000404123;P0CL82;P0CL81;P0CL80;O76087;ENSP00000416249_p.Y9C;ENSP00000416249_p.R13S	G antigen 12I;G antigen 12G;G antigen 12F;G antigen 7	GAGE12I;GAGE12G;GAGE12F;GAGE7	;ENSP00000483811_p.E19Q;ENSP00000416249_p.M23V;ENSP00000416249_p.R13S;ENSP00000416249_p.R28Q;ENSP00000416249_p.Y9C;ENSP00000409832_p.P16R;;;;;;ENSP00000416249_p.Y9C;ENSP00000416249_p.R13S	Alt+Ref	7.40551	9.37814	6.55295	9.38274	1.34346e-12	+			7;7;7;7;7;7;7;7;7;5;5	2;2;2;2;2;2;2;2;2;2;2	0;0;0;0;0;0;0;0;0;0;0
14826	ENSP00000419412;ENSP00000405600;P04920;ENSP00000419164_p.G12E;ENSP00000419164;ENSP00000376571_p.G17E;ENSP00000376571;ENSP00000419412_p.G26E;ENSP00000405600_p.G26E;P04920-2;P04920-3;ENSP00000419412_p.R371G;ENSP00000405600_p.R371G;ENSP00000419164_p.R357G;ENSP00000376571_p.R362G;ENSP00000418114;C9J9M9;ENSP00000418114_p.G26E;ENSP00000417808;C9J722;ENSP00000418584;C9J035;ENSP00000419379;C9JVC2;ENSP000…	ENSP00000419412;ENSP00000405600;P04920;ENSP00000419164_p.G12E;ENSP00000419164;ENSP00000376571_p.G17E;ENSP00000376571;ENSP00000419412_p.G26E;ENSP00000405600_p.G26E;P04920-2;P04920-3;ENSP00000419412_p.R371G;ENSP00000405600_p.R371G;ENSP00000419164_p.R357G;ENSP00000376571_p.R362G	Anion exchange protein 2	SLC4A2	ENSP00000419412_p.G26E;ENSP00000419412_p.R371G;ENSP00000405600_p.G26E;ENSP00000405600_p.R371G;;ENSP00000419164_p.G12E;ENSP00000419164_p.R357G;ENSP00000419164_p.G12E;ENSP00000376571_p.G17E;ENSP00000376571_p.R362G;ENSP00000376571_p.G17E;ENSP00000419412_p.G26E;ENSP00000405600_p.G26E;;;ENSP00000419412_p.R371G;ENSP00000405600_p.R371G;ENSP00000419164_p.R357G;ENSP00000376571_p.R362G;ENSP00000418114_p.G2…	Ref	8.09864	9.20955	3.69036	9.24195	0.000217062	+	Bile secretion;Gastric acid secretion;Pancreatic secretion;Salivary secretion	Bicarbonate transporters;SLC-mediated transmembrane transport;Transport of inorganic cations/anions and amino acids/oligopeptides;Transport of small molecules	44;44;44;43;43;43;43;43;43;43;43;42;42;41;41;6;6;5;4;4;4;4;3;3;3;3;3;3;3;3;3;2;2;2;2;2;1	44;44;44;43;43;43;43;43;43;43;43;42;42;41;41;6;6;5;4;4;4;4;3;3;3;3;3;3;3;3;3;2;2;2;2;2;1	20;20;20;19;19;19;19;19;19;19;19;20;20;19;19;4;4;3;2;2;2;2;1;1;1;1;0;0;0;0;0;1;1;0;0;0;0
14881	ENSP00000408146;P04440;H0Y7G7;ENSP00000412654;A0A140T9P1;A0A140T976;ENSP00000399832;H0Y5P2;A0A140T9Y0;A0A140T9I3;A0A0G2JII1;A0A140T8Z7;A0A140T9P7;A0A140T8Z3	ENSP00000408146;P04440;H0Y7G7;ENSP00000412654;A0A140T9P1;A0A140T976;ENSP00000399832;H0Y5P2;A0A140T9Y0;A0A140T9I3;A0A0G2JII1;A0A140T8Z7;A0A140T9P7	HLA class II histocompatibility antigen, DP beta 1 chain	HLA-DPB1		Unspecific	9.05394	6.16947	-9.58201	9.05451	1.65032e-31	+	Allograft rejection;Antigen processing and presentation;Asthma;Autoimmune thyroid disease;Cell adhesion molecules (CAMs);Epstein-Barr virus infection;Graft-versus-host disease;Hematopoietic cell lineage;Herpes simplex virus 1 infection;Human T-cell leukemia virus 1 infection;Inflammatory bowel disease (IBD);Influenza A;Intestinal immune network for IgA production;Leishmaniasis;Phagosome;Rheumatoi…	Adaptive Immune System;Costimulation by the CD28 family;Cytokine Signaling in Immune system;Downstream TCR signaling;Generation of second messenger molecules;Immune System;Interferon gamma signaling;Interferon Signaling;MHC class II antigen presentation;PD-1 signaling;Phosphorylation of CD3 and TCR zeta chains;TCR signaling;Translocation of ZAP-70 to Immunological synapse	11;11;10;10;10;10;10;10;10;10;7;7;7;4	10;10;9;9;9;9;9;9;9;9;6;6;6;3	3;3;3;3;3;3;3;3;3;3;3;0;0;0
14892	ENSP00000408487;P51991-2;Q8BG05-2	ENSP00000408487;P51991-2;Q8BG05-2	Heterogeneous nuclear ribonucleoprotein A3	HNRNPA3;Hnrnpa3		Unspecific	9.52301	8.79522	-2.41767	9.59752	6.49634e-05	+	Spliceosome	Metabolism of RNA;mRNA Splicing;mRNA Splicing - Major Pathway;Processing of Capped Intron-Containing Pre-mRNA	39;39;39	3;3;3	3;3;3
14908	ENSP00000409288;O00560-2;G5EA09;ENSP00000487245;ENSP00000428184	ENSP00000409288;O00560-2;G5EA09;ENSP00000487245;ENSP00000428184	Syntenin-1	SDCBP		Unspecific	8.59195	10.0535	4.85525	10.0683	8.69262e-08	+		Axon guidance;Developmental Biology;EPH-Ephrin signaling;Ephrin signaling;Immune System;Innate Immune System;L1CAM interactions;Neurofascin interactions;Neutrophil degranulation	23;23;21;21;21	23;23;21;21;21	2;2;2;2;2
14917	ENSP00000434779;ENSP00000433138;ENSP00000410076;P29466-2;P29466;G3V169;ENSP00000432340;ENSP00000434779_p.R375S;ENSP00000433138_p.R396S;ENSP00000410076_p.R396S;ENSP00000432340_p.R359S;ENSP00000434250;P29466-3;ENSP00000434250_p.R303S;ENSP00000436875;ENSP00000403260;P29466-4;H0YEC7;ENSP00000435536;ENSP00000436875_p.R255S;ENSP00000403260_p.R255S;ENSP00000434259;B4DVD8;ENSP00000434303;ENSP00000344132;…	ENSP00000434779;ENSP00000433138;ENSP00000410076;P29466-2;P29466;G3V169;ENSP00000432340;ENSP00000434779_p.R375S;ENSP00000433138_p.R396S;ENSP00000410076_p.R396S;ENSP00000432340_p.R359S;ENSP00000434250;P29466-3;ENSP00000434250_p.R303S;ENSP00000436875;ENSP00000403260;P29466-4;H0YEC7;ENSP00000435536;ENSP00000436875_p.R255S;ENSP00000403260_p.R255S;ENSP00000434259;B4DVD8	Caspase-1;Caspase-1 subunit p20;Caspase-1 subunit p10;Caspase	CASP1	ENSP00000434779_p.R375S;ENSP00000433138_p.R396S;ENSP00000410076_p.R396S;;;;ENSP00000432340_p.R359S;ENSP00000434779_p.R375S;ENSP00000433138_p.R396S;ENSP00000410076_p.R396S;ENSP00000432340_p.R359S;ENSP00000434250_p.R303S;;ENSP00000434250_p.R303S;ENSP00000436875_p.R255S;ENSP00000403260_p.R255S;;;;ENSP00000436875_p.R255S;ENSP00000403260_p.R255S;;;ENSP00000434303_p.R80S;ENSP00000344132_p.R80S;;ENSP000…	Unspecific	8.16075	9.27513	3.70187	9.30728	0.000139455	+	Amyotrophic lateral sclerosis (ALS);C-type lectin receptor signaling pathway;Cytosolic DNA-sensing pathway;Influenza A;Legionellosis;Necroptosis;NOD-like receptor signaling pathway;Pathogenic Escherichia coli infection;Pertussis;Salmonella infection;Shigellosis;Yersinia infection	Cytokine Signaling in Immune system;Gene expression (Transcription);Generic Transcription Pathway;Immune System;Inflammasomes;Innate Immune System;Interleukin-1 family signaling;Interleukin-1 processing;Interleukin-37 signaling;NOD1/2 Signaling Pathway;Nucleotide-binding domain, leucine rich repeat containing receptor (NLR) signaling pathways;RNA Polymerase II Transcription;Signaling by Interleuk…	22;22;22;22;22;21;21;21;21;21;20;19;19;18;14;14;14;13;13;13;13;12;12;7;7;7;6;6;3;3;3;3	20;20;20;20;20;19;19;19;19;19;18;17;17;16;13;13;13;11;11;12;12;11;11;7;7;7;6;6;3;3;3;3	18;18;18;18;18;17;17;17;17;17;16;17;17;16;13;13;13;11;11;12;12;9;9;7;7;7;6;6;1;1;1;1
15078	ENSP00000418194_p.T631A;ENSP00000418194_p.A561E;ENSP00000418194;Q460N5;ENSP00000418194_p.R450K;ENSP00000418194_p.R813W;Q460N5-4;Q460N5-1;H7C5R8;ENSP00000420649_p.T472A;ENSP00000420649_p.A402E;ENSP00000420649;ENSP00000420649_p.R291K;ENSP00000420649_p.R654W;Q460N5-3;Q460N5-5;ENSP00000497854;A0A3B3ITD5;H7C4Y3;ENSP00000418535	ENSP00000418194_p.T631A;ENSP00000418194_p.A561E;ENSP00000418194;Q460N5;ENSP00000418194_p.R450K;ENSP00000418194_p.R813W;Q460N5-4;Q460N5-1;H7C5R8;ENSP00000420649_p.T472A;ENSP00000420649_p.A402E;ENSP00000420649;ENSP00000420649_p.R291K;ENSP00000420649_p.R654W;Q460N5-3	Poly [ADP-ribose] polymerase 14	PARP14	ENSP00000418194_p.T631A;ENSP00000418194_p.A561E;ENSP00000418194_p.R450K;ENSP00000418194_p.R813W;ENSP00000418194_p.A561E;ENSP00000418194_p.T631A;;ENSP00000418194_p.R450K;ENSP00000418194_p.R813W;;;;ENSP00000420649_p.T472A;ENSP00000420649_p.A402E;ENSP00000420649_p.R291K;ENSP00000420649_p.R654W;ENSP00000420649_p.A402E;ENSP00000420649_p.T472A;ENSP00000420649_p.R291K;ENSP00000420649_p.R654W;;;;;;	Ref	9.11519	8.12109	-3.30236	9.15713	0.000303737	+		Metabolism;Metabolism of vitamins and cofactors;Metabolism of water-soluble vitamins and cofactors;Nicotinamide salvaging;Nicotinate metabolism	94;94;94;94;93;91;91;91;85;85;85;85;84;82;82;41;11;11;7;7	94;94;94;94;93;91;91;91;85;85;85;85;84;82;82;41;11;11;7;7	94;94;94;94;93;91;91;91;85;85;85;85;84;82;82;41;11;11;7;7
15104	ENSP00000419506_p.Y493C;ENSP00000419506_p.I482V;ENSP00000419506;ENSP00000419001_p.Y493C;ENSP00000419001_p.I482V;ENSP00000419001;Q8IXQ6-2;ENSP00000418894_p.Y493C;ENSP00000418894_p.I482V;ENSP00000418894;Q8IXQ6-3	ENSP00000419506_p.Y493C;ENSP00000419506_p.I482V;ENSP00000419506;ENSP00000419001_p.Y493C;ENSP00000419001_p.I482V;ENSP00000419001;Q8IXQ6-2;ENSP00000418894_p.Y493C;ENSP00000418894_p.I482V;ENSP00000418894;Q8IXQ6-3	Poly [ADP-ribose] polymerase 9	PARP9	ENSP00000419506_p.Y493C;ENSP00000419506_p.I482V;ENSP00000419506_p.Y493C;ENSP00000419506_p.I482V;ENSP00000419001_p.Y493C;ENSP00000419001_p.I482V;ENSP00000419001_p.Y493C;ENSP00000419001_p.I482V;;ENSP00000418894_p.Y493C;ENSP00000418894_p.I482V;ENSP00000418894_p.Y493C;ENSP00000418894_p.I482V;	Unspecific	9.05383	8.1078	-3.14264	9.10042	5.41689e-05	+		Metabolism;Metabolism of vitamins and cofactors;Metabolism of water-soluble vitamins and cofactors;Nicotinamide salvaging;Nicotinate metabolism	43;43;43;43;43;43;43;40;40;40;40	43;43;43;43;43;43;43;40;40;40;40	1;1;1;1;1;1;1;1;1;1;1
15114	ENSP00000419235;Q9Y4C2;ENSP00000348220;ENSP00000419235_p.E663D;ENSP00000419235_p.F421L;Q9Y4C2-2;ENSP00000348220_p.F421L;ENSP00000348220_p.E663D;Q8BNE1-3;ENSP00000420607;C9JD13;ENSP00000419622;C9K0E7;ENSP00000417600;C9J9F4	ENSP00000419235;Q9Y4C2;ENSP00000348220;ENSP00000419235_p.E663D;ENSP00000419235_p.F421L;Q9Y4C2-2;ENSP00000348220_p.F421L;ENSP00000348220_p.E663D	Protein FAM115A	FAM115A	ENSP00000419235_p.E663D;ENSP00000419235_p.F421L;;ENSP00000348220_p.E663D;ENSP00000348220_p.F421L;ENSP00000419235_p.E663D;ENSP00000419235_p.F421L;;ENSP00000348220_p.F421L;ENSP00000348220_p.E663D;;;;;;;	Ref	9.61917	8.71223	-3.01279	9.6699	3.61464e-05	+			33;33;32;32;32;32;31;31;11;3;3;2;2;2;2	33;33;32;32;32;32;31;31;11;3;3;2;2;2;2	17;17;17;16;17;17;17;16;0;3;3;2;2;2;2
15145	ENSP00000419990_p.H1196P;ENSP00000419990_p.A962T;ENSP00000419990;Q9UKE5-6;ENSP00000284483_p.H1225P;ENSP00000284483_p.A991T;ENSP00000284483;Q9UKE5-4;E0CZF8;E0CXD6;ENSP00000417338;C9J338;E0CYV5;ENSP00000419308;C9JVV1	ENSP00000419990_p.H1196P;ENSP00000419990_p.A962T;ENSP00000419990;Q9UKE5-6;ENSP00000284483_p.H1225P;ENSP00000284483_p.A991T;ENSP00000284483;Q9UKE5-4;E0CZF8;E0CXD6	TRAF2 and NCK-interacting protein kinase	TNIK;Tnik	ENSP00000419990_p.H1196P;ENSP00000419990_p.A962T;ENSP00000419990_p.H1196P;ENSP00000419990_p.A962T;;ENSP00000284483_p.H1225P;ENSP00000284483_p.A991T;ENSP00000284483_p.H1225P;ENSP00000284483_p.A991T;;;;;;;;	Unspecific	8.56836	7.48904	-3.58541	8.60311	0.00144709	+		Cellular responses to external stimuli;Cellular responses to stress;Cellular Senescence;Oxidative Stress Induced Senescence	64;64;64;64;63;63;63;63;53;52;11;11;9;1;1	47;47;47;47;46;46;46;46;36;35;5;5;4;1;1	0;0;0;0;0;0;0;0;0;0;0;0;0;0;0
15173	ENSP00000420876_p.T75M;ENSP00000422338_p.T75M;ENSP00000420876;ENSP00000422338;Q6P4H8-2;Q6P4H8;ENSP00000424210_p.T75M;ENSP00000427453_p.T75M;ENSP00000424210;D6RBE3;ENSP00000427453;D6RIE0;J3KN90;ENSP00000280330;E0CXY7;Q9D1Z3	ENSP00000420876_p.T75M;ENSP00000422338_p.T75M;ENSP00000420876;ENSP00000422338;Q6P4H8-2;Q6P4H8;ENSP00000424210_p.T75M;ENSP00000427453_p.T75M;ENSP00000424210;D6RBE3;ENSP00000427453;D6RIE0	Protein FAM173B	FAM173B	ENSP00000420876_p.T75M;ENSP00000422338_p.T75M;ENSP00000420876_p.T75M;ENSP00000422338_p.T75M;;;ENSP00000424210_p.T75M;ENSP00000427453_p.T75M;ENSP00000424210_p.T75M;;ENSP00000427453_p.T75M;;;;;	Alt	6.00279	8.14289	7.10925	8.14602	5.35589e-06	+			11;11;10;10;10;10;7;7;6;6;6;6;3;3;1;1	11;11;10;10;10;10;7;7;6;6;6;6;3;3;1;1	11;11;10;10;10;10;7;7;6;6;6;6;3;3;1;1
15209	ENSP00000423014;Q56VL3;ENSP00000425452;D6RD77;J3KPI9;ENSP00000370873;ENSP00000483997;ENSP00000273860;Q56VL3-2	ENSP00000423014;Q56VL3	OCIA domain-containing protein 2	OCIAD2		Unspecific	8.60656	7.4335	-3.89682	8.63478	0.000583654	+			10;10;4;4;4;4;4;4;4	10;10;4;4;4;4;4;4;4	6;6;1;1;1;1;1;1;1
15212	ENSP00000423252;O94988-6;ENSP00000423252_p.V415I	ENSP00000423252;O94988-6;ENSP00000423252_p.V415I	Protein FAM13A	FAM13A	ENSP00000423252_p.V415I;;ENSP00000423252_p.V415I	Ref	6.80127	8.25892	4.84224	8.27381	0.00118132	+		Rho GTPase cycle;Signal Transduction;Signaling by Rho GTPases	21;21;20	21;21;20	1;1;1
15224	ENSP00000423651_p.V228G;ENSP00000423651_p.S14P;ENSP00000423651_p.R695C;ENSP00000423651;Q86TI0-2;ENSP00000423651_p.R1127Q;ENSP00000397640;H7C0Z7	ENSP00000423651_p.V228G;ENSP00000423651_p.S14P;ENSP00000423651_p.R695C;ENSP00000423651;Q86TI0-2;ENSP00000423651_p.R1127Q	TBC1 domain family member 1	TBC1D1	ENSP00000423651_p.V228G;ENSP00000423651_p.S14P;ENSP00000423651_p.R695C;ENSP00000423651_p.S14P;ENSP00000423651_p.V228G;ENSP00000423651_p.R695C;ENSP00000423651_p.R1127Q;;ENSP00000423651_p.R1127Q;;	Unspecific	7.45494	5.48384	-6.54783	7.45955	0.000578128	+	AMPK signaling pathway	Membrane Trafficking;Translocation of SLC2A4 (GLUT4) to the plasma membrane;Vesicle-mediated transport	36;36;36;36;36;34;5;5	10;10;10;10;10;8;3;3	0;0;0;0;0;0;0;0
15273	ENSP00000425845_p.V718F;ENSP00000493623_p.V728F;ENSP00000425845;ENSP00000493623;O15117-2;O15117-3;ENSP00000426346_p.V672F;ENSP00000316460_p.V672F;ENSP00000426346;ENSP00000316460;O15117;ENSP00000426597;D6RFJ5;ENSP00000424919;D6RER7;ENSP00000421988;D6RAE8;ENSP00000423888;D6RC38;ENSP00000495508;A0A2R8YEE1	ENSP00000425845_p.V718F;ENSP00000493623_p.V728F;ENSP00000425845;ENSP00000493623;O15117-2;O15117-3;ENSP00000426346_p.V672F;ENSP00000316460_p.V672F;ENSP00000426346;ENSP00000316460;O15117	FYN-binding protein	FYB	ENSP00000425845_p.V718F;ENSP00000493623_p.V728F;ENSP00000425845_p.V718F;ENSP00000493623_p.V728F;;;ENSP00000426346_p.V672F;ENSP00000316460_p.V672F;ENSP00000426346_p.V672F;ENSP00000316460_p.V672F;;;;;;;;;;;	Alt	6.51845	8.64708	7.07118	8.6503	9.79722e-09	+	Rap1 signaling pathway;Yersinia infection	Adaptive Immune System;Cell-Cell communication;Generation of second messenger molecules;Immune System;Signal regulatory protein family interactions;TCR signaling	32;32;31;31;31;31;30;30;29;29;29;8;8;7;7;5;5;2;2;1;1	27;27;26;26;26;26;25;25;24;24;24;8;8;7;7;5;5;2;2;1;1	27;27;26;26;26;26;25;25;24;24;24;8;8;7;7;5;5;2;2;1;1
15477	ENSP00000440674_p.(Q425_Q439)del;ENSP00000437659_p.(Q425_Q439)del;ENSP00000440674;ENSP00000437659;P78364;ENSP00000399194_p.(Q380_Q394)del;J3KQH6;ENSP00000399194;ENSP00000440674_p.D912Y;ENSP00000437659_p.D912Y;ENSP00000440674_p.T693A;ENSP00000437659_p.T693A;ENSP00000399194_p.D867Y;ENSP00000399194_p.T648A;F5H6P9;ENSP00000437459;F7D980;E0CXA6;E0CYR2;E0CYV8;H0YH74;ENSP00000446388;E0CXC9;ENSP000004453…	ENSP00000440674_p.(Q425_Q439)del;ENSP00000437659_p.(Q425_Q439)del;ENSP00000440674;ENSP00000437659;P78364;ENSP00000399194_p.(Q380_Q394)del;J3KQH6;ENSP00000399194;ENSP00000440674_p.D912Y;ENSP00000437659_p.D912Y;ENSP00000440674_p.T693A;ENSP00000437659_p.T693A;ENSP00000399194_p.D867Y;ENSP00000399194_p.T648A	Polyhomeotic-like protein 1	PHC1	ENSP00000440674_p.(Q425_Q439)del;ENSP00000437659_p.(Q425_Q439)del;ENSP00000440674_p.D912Y;ENSP00000440674_p.T693A;ENSP00000440674_p.(Q425_Q439)del;ENSP00000437659_p.D912Y;ENSP00000437659_p.T693A;ENSP00000437659_p.(Q425_Q439)del;;ENSP00000399194_p.(Q380_Q394)del;;ENSP00000399194_p.D867Y;ENSP00000399194_p.T648A;ENSP00000399194_p.(Q380_Q394)del;ENSP00000440674_p.D912Y;ENSP00000437659_p.D912Y;ENSP000…	Ref	6.85245	8.39888	5.13712	8.41105	0.00024398	+		Cellular responses to external stimuli;Cellular responses to stress;Cellular Senescence;Gene expression (Transcription);Generic Transcription Pathway;Intracellular signaling by second messengers;Metabolism of proteins;Oxidative Stress Induced Senescence;PIP3 activates AKT signaling;Post-translational protein modification;PTEN Regulation;Regulation of PTEN gene transcription;RNA Polymerase II Tran…	15;15;15;15;15;14;14;14;14;14;14;14;13;13;3;3;1;1;1;1;1;1;1;1;1;1;1;1;1;1;1;1;1;1;1;1;1;1	15;15;15;15;15;14;14;14;14;14;14;14;13;13;3;3;1;1;1;1;1;1;1;1;1;1;1;1;1;1;1;1;1;1;1;1;1;1	10;10;10;10;10;10;10;10;9;9;9;9;9;9;2;2;0;0;0;0;1;1;0;1;1;0;0;0;0;0;0;0;0;1;1;1;0;0
15485	ENSP00000437959_p.R726Q;ENSP00000437959;Q15063-3	ENSP00000437959_p.R726Q;ENSP00000437959;Q15063-3	Periostin	POSTN	ENSP00000437959_p.R726Q;ENSP00000437959_p.R726Q;	Unspecific	8.66437	7.06733	-5.30525	8.67522	1.30404e-05	+			54;54;54	3;3;3	0;0;0
15725	LRG_1215p1;ENSP00000497910;ENSP00000453350;ENSP00000453191;P61769	LRG_1215p1;ENSP00000497910;ENSP00000453350;ENSP00000453191;P61769	Beta-2-microglobulin;Beta-2-microglobulin form pI 5.3	B2M		Unspecific	10.1557	9.34679	-2.687	10.2183	3.82528e-05	+	Antigen processing and presentation;Epstein-Barr virus infection;Herpes simplex virus 1 infection;Human cytomegalovirus infection;Human immunodeficiency virus 1 infection;Human T-cell leukemia virus 1 infection	Adaptive Immune System;Amyloid fiber formation;Antigen Presentation: Folding, assembly and peptide loading of class I MHC;Antigen processing-Cross presentation;Class I MHC mediated antigen processing & presentation;Cytokine Signaling in Immune system;DAP12 interactions;DAP12 signaling;Disease;Endosomal/Vacuolar pathway;ER-Phagosome pathway;HIV Infection;Host Interactions of HIV factors;Immune Sys…	7;7;7;7;7	7;7;7;7;7	2;2;2;2;2
15728	H0YLN8;ENSP00000453277;ENSP00000495860;Q96QT4;ENSP00000452873;A0A0C4DGL2;ENSP00000454066;H0YNM0;F6QKC0;J9SUB2;H0Y3D4;ENSP00000366301;A0A494BAQ5;ENSP00000355395;D3Z539;A0A494BA79;Q4VXD4;ENSP00000379579_p.K267E;ENSP00000379579;Q96LV9;ENSP00000351942_p.R281H;ENSP00000351942;Q504Y1;ENSP00000366305;Q9HCF6-12	H0YLN8;ENSP00000453277;ENSP00000495860;Q96QT4	Transient receptor potential cation channel subfamily M member 7	TRPM7	;;;;;;;;;;;;;;;;;ENSP00000379579_p.K267E;ENSP00000379579_p.K267E;;ENSP00000351942_p.R281H;ENSP00000351942_p.R281H;;;	Unspecific	6.31061	8.67347	7.84927	8.67535	2.21474e-09	+	Cellular senescence;Mineral absorption;Necroptosis;NOD-like receptor signaling pathway	Ion channel transport;Stimuli-sensing channels;Transport of small molecules;TRP channels	66;66;66;66;14;14;4;4;3;2;1;1;1;1;1;1;1;1;1;1;1;1;1;1;1	66;66;66;66;14;14;4;4;3;2;1;1;1;1;1;1;1;1;1;1;1;1;1;1;1	30;30;30;30;6;6;1;1;0;0;0;0;0;0;0;0;0;0;0;0;0;0;0;0;0
15742	ENSP00000479134_p.L686P;ENSP00000454047_p.L686P	ENSP00000479134_p.L686P;ENSP00000454047_p.L686P			ENSP00000479134_p.L686P;ENSP00000454047_p.L686P	Alt+Ref	7.2617	8.90135	5.44679	8.91119	1.09627e-07	+			61;61	61;61	2;2
15764	ENSP00000455933_p.P767L;ENSP00000455933_p.L549M;ENSP00000455933_p.C91Y;ENSP00000455933;ENSP00000455265_p.P793L;ENSP00000455265_p.L575M;ENSP00000455265_p.C91Y;ENSP00000455265;Q15572-6;Q15572;ENSP00000345305_p.P699L;ENSP00000345305_p.L481M;ENSP00000345305_p.C24Y;ENSP00000345305;Q15572-2;ENSP00000455247_p.P461L;ENSP00000455247_p.L243M;ENSP00000455247;ENSP00000437900_p.P461L;ENSP00000437900_p.L243M;E…	ENSP00000455933_p.P767L;ENSP00000455933_p.L549M;ENSP00000455933_p.C91Y;ENSP00000455933;ENSP00000455265_p.P793L;ENSP00000455265_p.L575M;ENSP00000455265_p.C91Y;ENSP00000455265;Q15572-6;Q15572;ENSP00000345305_p.P699L;ENSP00000345305_p.L481M;ENSP00000345305_p.C24Y;ENSP00000345305;Q15572-2;ENSP00000455247_p.P461L;ENSP00000455247_p.L243M;ENSP00000455247;ENSP00000437900_p.P461L;ENSP00000437900_p.L243M;E…	TATA box-binding protein-associated factor RNA polymerase I subunit C	TAF1C	ENSP00000455933_p.P767L;ENSP00000455933_p.L549M;ENSP00000455933_p.C91Y;ENSP00000455933_p.C91Y;ENSP00000455933_p.L549M;ENSP00000455933_p.P767L;ENSP00000455265_p.P793L;ENSP00000455265_p.L575M;ENSP00000455265_p.C91Y;ENSP00000455265_p.C91Y;ENSP00000455265_p.L575M;ENSP00000455265_p.P793L;;;ENSP00000345305_p.P699L;ENSP00000345305_p.L481M;ENSP00000345305_p.C24Y;ENSP00000345305_p.C24Y;ENSP00000345305_p.L…	Unspecific	6.3393	8.28751	6.47181	8.29238	4.10615e-05	+		B-WICH complex positively regulates rRNA expression;Epigenetic regulation of gene expression;Gene expression (Transcription);Negative epigenetic regulation of rRNA expression;NoRC negatively regulates rRNA expression;Positive epigenetic regulation of rRNA expression;RNA Polymerase I Promoter Clearance;RNA Polymerase I Promoter Escape;RNA Polymerase I Transcription;RNA Polymerase I Transcription I…	26;26;26;26;26;26;26;26;26;26;25;25;25;25;25;17;17;17;17;17;17;17;12;10;10;10;10;3;3;3;3;3;3;3;2;2;2;1;1	26;26;26;26;26;26;26;26;26;26;25;25;25;25;25;17;17;17;17;17;17;17;12;10;10;10;10;3;3;3;3;3;3;3;2;2;2;1;1	24;24;24;24;24;24;24;24;24;24;23;23;23;23;23;15;15;15;15;15;15;15;12;8;8;8;8;3;3;3;3;3;3;3;2;2;2;1;1
15949	ENSP00000465883;Q13938-4;ENSP00000498855;Q13938;K7ES72;ENSP00000468582;ENSP00000403263;A0A499FJ41;ENSP00000498403;Q13938-3	ENSP00000465883;Q13938-4;ENSP00000498855;Q13938;K7ES72;ENSP00000468582;ENSP00000403263;A0A499FJ41;ENSP00000498403;Q13938-3	Calcyphosin	CAPS		Unspecific	7.04698	9.14432	6.96721	9.14778	4.56086e-13	+	African trypanosomiasis;Allograft rejection;alpha-Linolenic acid metabolism;Aminoacyl-tRNA biosynthesis;Amoebiasis;Antigen processing and presentation;Arachidonic acid metabolism;Arginine and proline metabolism;Asthma;Autoimmune thyroid disease;B cell receptor signaling pathway;beta-Alanine metabolism;Calcium signaling pathway;Cell adhesion molecules (CAMs);Chemical carcinogenesis;Cholesterol met…		13;13;12;12;9;9;9;9;8;8	13;13;12;12;9;9;9;9;8;8	13;13;12;12;9;9;9;9;8;8
15974	LRG_391p1_p.I10522V;ENSP00000467141_p.I10522V;Q8WZ42-12;LRG_391p1_p.V8660I;LRG_391p1_p.V33889I;LRG_391p1_p.V2823F;LRG_391p1_p.T26621M;LRG_391p1_p.S8425N;LRG_391p1_p.S788L;LRG_391p1_p.S3419N;LRG_391p1_p.S28701F;LRG_391p1_p.S1295L;LRG_391p1_p.R34594H;LRG_391p1_p.R33761L;LRG_391p1_p.R27414Q;LRG_391p1_p.R19479H;LRG_391p1_p.R11096H;LRG_391p1_p.P3990L;LRG_391p1_p.P24909S;LRG_391p1_p.P19862L;LRG_391p1_p…	LRG_391p1_p.I10522V;ENSP00000467141_p.I10522V;Q8WZ42-12;LRG_391p1_p.V8660I;LRG_391p1_p.V33889I;LRG_391p1_p.V2823F;LRG_391p1_p.T26621M;LRG_391p1_p.S8425N;LRG_391p1_p.S788L;LRG_391p1_p.S3419N;LRG_391p1_p.S28701F;LRG_391p1_p.S1295L;LRG_391p1_p.R34594H;LRG_391p1_p.R33761L;LRG_391p1_p.R27414Q;LRG_391p1_p.R19479H;LRG_391p1_p.R11096H;LRG_391p1_p.P3990L;LRG_391p1_p.P24909S;LRG_391p1_p.P19862L;LRG_391p1_p…			LRG_391p1_p.I10522V;ENSP00000467141_p.I10522V;;LRG_391p1_p.V8660I;LRG_391p1_p.V33889I;LRG_391p1_p.V2823F;LRG_391p1_p.T26621M;LRG_391p1_p.S8425N;LRG_391p1_p.S788L;LRG_391p1_p.S3419N;LRG_391p1_p.S28701F;LRG_391p1_p.S1295L;LRG_391p1_p.R34594H;LRG_391p1_p.R33761L;LRG_391p1_p.R27414Q;LRG_391p1_p.R19479H;LRG_391p1_p.R11096H;LRG_391p1_p.P3990L;LRG_391p1_p.P24909S;LRG_391p1_p.P19862L;LRG_391p1_p.P12862S;…	Alt	9.38194	8.71428	-2.21791	9.4665	0.000214925	+	Dilated cardiomyopathy (DCM);Hypertrophic cardiomyopathy (HCM)	Hemostasis;Muscle contraction;Platelet activation, signaling and aggregation;Platelet degranulation;Response to elevated platelet cytosolic Ca2+;Striated Muscle Contraction	1263;1263;1262;1262;1262;1262;1262;1262;1262;1262;1262;1262;1262;1262;1262;1262;1262;1262;1262;1262;1262;1262;1262;1262;1262;1262;1262;1262;1262;1262;1262;1262;1262;1262;1262;1262;1262;1262;1262;1262;1262;1262;1262;1262;1262;1262;1262;1262;1262;1262;1262;1262;1262;1262;1262;1262;1262;1262;1262;1262;1262;1262;1262;1262;1262;1262;1262;1262;1262;1262;1262;1262;1262;1262;1262;1262;1262;1262;1262;1262…	51;51;51;51;51;51;51;51;51;51;51;51;51;51;51;51;51;51;51;51;51;51;51;51;51;51;51;51;51;51;51;51;51;51;51;51;51;51;51;51;51;51;51;51;51;51;51;51;51;51;51;51;51;51;51;51;51;51;51;51;51;51;51;51;51;51;51;51;51;51;51;51;51;51;51;51;51;51;51;51;51;51;51;51;51;51;51;51;51;51;51;51;51;51;50;50;51;51;51;51;51;51;51;51;51;51;51;51;51;51;51;51;51;51;51;51;51;51;51;51;51;51;51;51;51;51;51;51;50;50;1;1	0;0;0;0;0;0;0;0;0;0;0;0;0;0;0;0;0;0;0;0;0;0;0;0;0;0;0;0;0;0;0;0;0;0;0;0;0;0;0;0;0;0;0;0;0;0;0;0;0;0;0;0;0;0;0;0;0;0;0;0;0;0;0;0;0;0;0;0;0;0;0;0;0;0;0;0;0;0;0;0;0;0;0;0;0;0;0;0;0;0;0;0;0;0;0;0;0;0;0;0;0;0;0;0;0;0;0;0;0;0;0;0;0;0;0;0;0;0;0;0;0;0;0;0;0;0;0;0;0;0;0;0
15979	ENSP00000467271;O94911-3;ENSP00000402814;A0A0A0MSU4;ENSP00000269080;O94911;ENSP00000467186;A0A075B774;O94911-2;K7ELK9;ENSP00000466126;Q49AI9;ENSP00000481467	ENSP00000467271;O94911-3;ENSP00000402814;A0A0A0MSU4;ENSP00000269080;O94911	ATP-binding cassette sub-family A member 8	ABCA8		Unspecific	7.31976	8.71759	4.64348	8.73462	0.000533844	+	ABC transporters	ABC-family proteins mediated transport;Transport of small molecules	41;41;40;40;38;38;17;17;6;2;2;2;2	41;41;40;40;38;38;17;17;6;2;2;2;2	28;28;27;27;26;26;13;13;6;2;2;2;2
16035	ENSP00000471017_p.Y145C;ENSP00000472733_p.Y145C	ENSP00000471017_p.Y145C			ENSP00000471017_p.Y145C;ENSP00000472733_p.Y145C	Alt+Ref	8.46084	7.02408	-4.77285	8.47645	1.34095e-05	+			11;4	6;1	0;0
16251	LRG_376p1_p.R268W;LRG_376p1;ENSP00000482457_p.R268W;ENSP00000482457;P16885;ENSP00000352336_p.R268W;ENSP00000352336;A0A0A0MRF9;H3BQV5;ENSP00000455956;H3BPZ3	LRG_376p1_p.R268W;LRG_376p1;ENSP00000482457_p.R268W;ENSP00000482457;P16885;ENSP00000352336_p.R268W;ENSP00000352336;A0A0A0MRF9	1-phosphatidylinositol 4,5-bisphosphate phosphodiesterase gamma-2	PLCG2	LRG_376p1_p.R268W;LRG_376p1_p.R268W;ENSP00000482457_p.R268W;ENSP00000482457_p.R268W;;ENSP00000352336_p.R268W;ENSP00000352336_p.R268W;;;;	Unspecific	9.70717	8.34439	-4.52705	9.72561	1.84007e-09	+	AGE-RAGE signaling pathway in diabetic complications;Axon guidance;B cell receptor signaling pathway;Calcium signaling pathway;C-type lectin receptor signaling pathway;EGFR tyrosine kinase inhibitor resistance;Epithelial cell signaling in Helicobacter pylori infection;Epstein-Barr virus infection;ErbB signaling pathway;Fc epsilon RI signaling pathway;Fc gamma R-mediated phagocytosis;Glioma;Growth…	Adaptive Immune System;Antigen activates B Cell Receptor (BCR) leading to generation of second messengers;CLEC7A (Dectin-1) signaling;C-type lectin receptors (CLRs);DAP12 interactions;DAP12 signaling;Dectin-2 family;Erythropoietin activates Phospholipase C gamma (PLCG);Fc epsilon receptor (FCERI) signaling;FCERI mediated Ca+2 mobilization;FCERI mediated MAPK activation;Fcgamma receptor (FCGR) dep…	78;78;78;78;78;77;77;77;8;8;8	78;78;78;78;78;77;77;77;8;8;8	33;33;33;33;33;32;32;32;4;4;0
16279	ENSP00000484804_p.I180V;ENSP00000484804_p.I180K;ENSP00000484804;ENSP00000484241_p.I180V;ENSP00000484241_p.I180K;ENSP00000484241;Q7Z3E5;ENSP00000258417_p.I180V;ENSP00000258417_p.I180K;ENSP00000258417;A0A2Q3DP09;Q7Z3E5-2;H7BZY2;ENSP00000392086;ENSP00000413932;H7C3U7;ENSP00000411778;C9J535;ENSP00000388527;H7BZA2;ENSP00000387391;C9JW07	ENSP00000484804_p.I180V;ENSP00000484804_p.I180K;ENSP00000484804;ENSP00000484241_p.I180V;ENSP00000484241_p.I180K;ENSP00000484241;Q7Z3E5;ENSP00000258417_p.I180V;ENSP00000258417_p.I180K;ENSP00000258417;A0A2Q3DP09;Q7Z3E5-2	LisH domain-containing protein ARMC9	ARMC9	ENSP00000484804_p.I180V;ENSP00000484804_p.I180K;ENSP00000484804_p.I180V;ENSP00000484804_p.I180K;ENSP00000484241_p.I180V;ENSP00000484241_p.I180K;ENSP00000484241_p.I180V;ENSP00000484241_p.I180K;;ENSP00000258417_p.I180V;ENSP00000258417_p.I180K;ENSP00000258417_p.I180V;ENSP00000258417_p.I180K;;;;;;;;;;;;	Unspecific	7.76219	8.86809	3.67375	8.90086	0.000495069	+			35;35;35;35;35;35;35;30;30;30;30;30;13;13;12;12;7;7;7;7;6;6	35;35;35;35;35;35;35;30;30;30;30;30;13;13;12;12;7;7;7;7;6;6	19;19;19;19;19;19;19;14;14;14;14;14;7;7;6;6;5;5;5;5;3;3
16328	ENSP00000490664_p.N229S;ENSP00000489365_p.N138S	ENSP00000490664_p.N229S			ENSP00000490664_p.N229S;ENSP00000489365_p.N138S	Alt+Ref	9.3897	7.96564	-4.73063	9.40576	6.12933e-09	+			69;19	1;0	0;0
16412	LRG_1231p1_p.S83N;ENSP00000496832_p.S83N;ENSP00000485643_p.S75N;ENSP00000485313_p.S75N	LRG_1231p1_p.S83N;ENSP00000496832_p.S83N;ENSP00000485643_p.S75N;ENSP00000485313_p.S75N			LRG_1231p1_p.S83N;ENSP00000496832_p.S83N;ENSP00000485643_p.S75N;ENSP00000485313_p.S75N	Alt+Ref	9.63594	7.26594	-7.87296	9.63778	2.79786e-24	+			10;10;9;8	10;10;9;8	2;2;2;2
16427	LRG_1235p1_p.H843R;LRG_1235p1_p.A946T;LRG_1235p1;ENSP00000497271_p.H843R;ENSP00000497271_p.A946T;ENSP00000497271;Q9BYX4;LRG_1235p1_p.I923V;ENSP00000497271_p.I923V;ENSP00000496816_p.H804R;ENSP00000496816_p.A907T;ENSP00000496816;A0A3B3IRK8;ENSP00000496816_p.I884V;ENSP00000408450;Q9BYX4-2	LRG_1235p1_p.H843R;LRG_1235p1_p.A946T;LRG_1235p1;ENSP00000497271_p.H843R;ENSP00000497271_p.A946T;ENSP00000497271;Q9BYX4;LRG_1235p1_p.I923V;ENSP00000497271_p.I923V;ENSP00000496816_p.H804R;ENSP00000496816_p.A907T;ENSP00000496816;A0A3B3IRK8;ENSP00000496816_p.I884V	Interferon-induced helicase C domain-containing protein 1	IFIH1	LRG_1235p1_p.H843R;LRG_1235p1_p.A946T;LRG_1235p1_p.I923V;LRG_1235p1_p.A946T;LRG_1235p1_p.H843R;ENSP00000497271_p.H843R;ENSP00000497271_p.A946T;ENSP00000497271_p.I923V;ENSP00000497271_p.A946T;ENSP00000497271_p.H843R;;LRG_1235p1_p.I923V;ENSP00000497271_p.I923V;ENSP00000496816_p.H804R;ENSP00000496816_p.A907T;ENSP00000496816_p.I884V;ENSP00000496816_p.A907T;ENSP00000496816_p.H804R;;ENSP00000496816_p.I…	Ref	8.52935	7.40765	-3.72623	8.56099	0.000967012	+	Hepatitis B;Herpes simplex virus 1 infection;Influenza A;Measles;RIG-I-like receptor signaling pathway	DDX58/IFIH1-mediated induction of interferon-alpha/beta;Deubiquitination;Immune System;Innate Immune System;Metabolism of proteins;Negative regulators of DDX58/IFIH1 signaling;NF-kB activation through FADD/RIP-1 pathway mediated by caspase-8 and -10;Ovarian tumor domain proteases;Post-translational protein modification;TRAF3-dependent IRF activation pathway;TRAF6 mediated IRF7 activation;TRAF6 me…	41;41;41;41;41;41;41;40;40;35;35;35;35;34;5;5	28;28;28;28;28;28;28;27;27;22;22;22;22;21;5;5	28;28;28;28;28;28;28;27;27;22;22;22;22;21;5;5
16428	LRG_1208p1_p.Y39F;LRG_1208p1_p.V417I;LRG_1208p1_p.K495E;LRG_1208p1_p.I1036T;LRG_1208p1;ENSP00000497274_p.Y39F;ENSP00000497274_p.V417I;ENSP00000497274_p.K495E;ENSP00000497274_p.I1036T;ENSP00000497274;Q92887;ENSP00000497778;A0A3B3ITG8	LRG_1208p1_p.Y39F;LRG_1208p1_p.V417I;LRG_1208p1_p.K495E;LRG_1208p1_p.I1036T;LRG_1208p1;ENSP00000497274_p.Y39F;ENSP00000497274_p.V417I;ENSP00000497274_p.K495E;ENSP00000497274_p.I1036T;ENSP00000497274;Q92887	Canalicular multispecific organic anion transporter 1	ABCC2	LRG_1208p1_p.Y39F;LRG_1208p1_p.V417I;LRG_1208p1_p.K495E;LRG_1208p1_p.I1036T;LRG_1208p1_p.Y39F;LRG_1208p1_p.V417I;LRG_1208p1_p.I1036T;LRG_1208p1_p.K495E;ENSP00000497274_p.Y39F;ENSP00000497274_p.V417I;ENSP00000497274_p.K495E;ENSP00000497274_p.I1036T;ENSP00000497274_p.Y39F;ENSP00000497274_p.V417I;ENSP00000497274_p.I1036T;ENSP00000497274_p.K495E;;;	Unspecific	6.3398	8.33993	6.64428	8.34425	2.49536e-05	+	ABC transporters;Antifolate resistance;Bile secretion;Platinum drug resistance	ABC transporter disorders;ABC-family proteins mediated transport;Defective ABCC2 causes Dubin-Johnson syndrome;Disease;Disorders of transmembrane transporters;Transport of small molecules	22;22;22;22;22;22;22;22;22;22;22;2;2	22;22;22;22;22;22;22;22;22;22;22;2;2	17;17;17;17;17;17;17;17;17;17;17;2;2
16596	F8VPN4;A0A0G2JGI9;F6XXE6;E0CYU6;E0CX86;F7CSZ6;ENSP00000354971;A0A1C7CYW1	F8VPN4;A0A0G2JGI9;F6XXE6		Agl		Unspecific	10.0867	8.9894	-3.64513	10.1201	1.17269e-07	+	Metabolic pathways;Starch and sucrose metabolism	Glycogen breakdown (glycogenolysis);Glycogen metabolism;Immune System;Innate Immune System;Metabolism;Metabolism of carbohydrates;Neutrophil degranulation	105;85;55;17;9;6;2;2	105;85;55;17;9;6;2;2	65;53;33;9;3;3;0;0
16793	G3X9K3;D3YYK9;ENSP00000429560;E5RHZ1	G3X9K3;D3YYK9	Brefeldin A-inhibited guanine nucleotide-exchange protein 1	Arfgef1		Unspecific	8.24339	6.50306	-5.78125	8.25122	0.000317912	+	Endocytosis		90;49;9;9	11;7;0;0	11;7;0;0
16812	G5E846;P15331-3;P15331;A0A2R8W6R6;G3X981;P15331-2;F8W835;ENSP00000408897;ENSP00000437182_p.G176V;ENSP00000437182;H7C5W5	G5E846;P15331-3;P15331;A0A2R8W6R6;G3X981;P15331-2	Peripherin	Prph	;;;;;;;;ENSP00000437182_p.G176V;ENSP00000437182_p.G176V;	Unspecific	8.62851	7.47023	-3.84772	8.65767	0.00131619	+	Amyotrophic lateral sclerosis (ALS)		32;31;31;30;30;29;14;14;10;10;10	26;25;25;24;24;23;12;12;4;4;4	6;5;5;6;6;5;0;0;0;0;0
16860	G5E924;Q8R081;G3UY38;ENSP00000472150;M0R1W6;ENSP00000373401;B4DVF8;G3UY56;ENSP00000469913;M0QYL7;G3UYY3	G5E924;Q8R081;G3UY38	Heterogeneous nuclear ribonucleoprotein L	Hnrnpl		Unspecific	9.73958	8.90311	-2.77867	9.79866	0.000122994	+		Metabolism of RNA;mRNA Splicing;mRNA Splicing - Major Pathway;Processing of Capped Intron-Containing Pre-mRNA	40;37;29;9;9;7;7;7;6;6;3	12;9;4;0;0;0;0;0;0;0;0	9;9;4;0;0;0;0;0;0;0;0
17014	O08759-2;O08759;O08759-3;A0A0J9YUK0;ENSP00000487178;A0A0J9YVG1;A0A0D9SG63;S4R306;ENSP00000473822;A0A0J9YUY4;A0A140LHS2;ENSP00000487552;ENSP00000486900;A0A0J9YTX6;A0A0D9SFU3;ENSP00000489625;A0A1B0GTB3;ENSP00000487148;A0A0D9SG54;A0A140LI50	O08759-2;O08759;O08759-3	Ubiquitin-protein ligase E3A	Ube3a		Unspecific	8.96792	7.50405	-4.86288	8.9826	3.15822e-07	+	Human papillomavirus infection;Ubiquitin mediated proteolysis;Viral carcinogenesis	Adaptive Immune System;Antigen processing: Ubiquitination & Proteasome degradation;Class I MHC mediated antigen processing & presentation;Immune System	47;47;40;14;12;12;12;11;11;11;5;2;2;2;2;2;2;2;2;2	10;10;10;8;0;0;0;0;0;0;0;0;0;0;0;0;0;0;0;0	10;10;10;8;0;0;0;0;0;0;0;0;0;0;0;0;0;0;0;0
17379	O94966-4;ENSP00000381870;E7ESU0	O94966-4;ENSP00000381870;E7ESU0	Ubiquitin carboxyl-terminal hydrolase 19;Ubiquitin carboxyl-terminal hydrolase	USP19		Unspecific	8.55177	6.60287	-6.4741	8.55663	3.0023e-08	+		Deubiquitination;Metabolism of proteins;Post-translational protein modification;Ub-specific processing proteases	55;49;49	2;1;1	0;0;0
17383	O95466-2;ENSP00000327442;A0A0A0MR62	O95466-2	Formin-like protein 1	FMNL1	;ENSP00000327442_p.P173A;	Alt	8.79844	6.79824	-6.64455	8.80276	2.75343e-11	+		RHO GTPase Effectors;RHO GTPases Activate Formins;Signal Transduction;Signaling by Rho GTPases	57;26;26	26;12;12	0;0;0
17441	P04247;A0A2R8VK58;A0A2R8W6F8;F2Z337;ENSP00000414243	P04247;A0A2R8VK58;A0A2R8W6F8	Myoglobin	Mb		Unspecific	9.99521	6.49457	-11.6289	9.99535	2.00105e-58	+		Intracellular oxygen transport;Transport of small molecules	14;8;7;1;1	14;8;7;1;1	13;7;7;0;0
17462	P05977;E0CZ30;A0A087WRZ7;ENSP00000343321;P05976-2	P05977;E0CZ30	Myosin light chain 1/3, skeletal muscle isoform	Myl1		Unspecific	11.0974	9.51426	-5.25908	11.1086	8.44631e-15	+		Muscle contraction;Striated Muscle Contraction	29;20;11;7;7	29;20;11;7;7	9;9;0;0;0
17464	P06151;A0A1B0GSX0;A0A1B0GSR9;D3YZQ9;A0A1B0GQX5;A0A1B0GT41;A0A1B0GSL7;A0A1B0GRW9;A0A1B0GS79;A0A1B0GRC1;ENSP00000478764;A0A087WUM2;D3YVR7;D3YZE4;ENSP00000379516;ENSP00000280706;Q6ZMR3;P00342;A0A1B0GSR2;F5H5G7;ENSP00000443414;F5H155;ENSP00000443997;G3XAP5;ENSP00000439060;A0A1B0GRE9	P06151;A0A1B0GSX0;A0A1B0GSR9;D3YZQ9;A0A1B0GQX5;A0A1B0GT41	L-lactate dehydrogenase A chain;L-lactate dehydrogenase	Ldha		Unspecific	10.5857	9.63702	-3.15146	10.632	1.79152e-06	+	Central carbon metabolism in cancer;Cysteine and methionine metabolism;Glucagon signaling pathway;Glycolysis / Gluconeogenesis;HIF-1 signaling pathway;Metabolic pathways;Propanoate metabolism;Pyruvate metabolism	Metabolism;Pyruvate metabolism;Pyruvate metabolism and Citric Acid (TCA) cycle;The citric acid (TCA) cycle and respiratory electron transport	36;34;32;25;20;19;16;10;10;7;2;2;2;2;2;2;2;2;1;1;1;1;1;1;1;1	24;22;20;17;13;13;13;9;9;6;0;0;0;0;0;0;0;0;0;0;0;0;0;0;0;0	18;18;16;11;7;7;7;3;3;0;0;0;0;0;0;0;0;0;0;0;0;0;0;0;0;0
17488	P07934;ENSP00000297373;F6VCX5;ENSP00000441528;ENSP00000445440;Q16816;Q16816-2;D3Z472;D3Z1B5;ENSP00000389721;C9JME8;ENSP00000397193;C9J2Q6;F8WD25;ENSP00000378817	P07934	Phosphorylase b kinase gamma catalytic chain, skeletal muscle/heart isoform	Phkg1		Unspecific	9.03698	5.81121	-10.7158	9.03723	9.00544e-39	+	Calcium signaling pathway;Glucagon signaling pathway;Insulin signaling pathway	Glycogen breakdown (glycogenolysis);Glycogen metabolism;Metabolism;Metabolism of carbohydrates	24;11;11;11;11;11;11;10;6;4;4;4;4;1;1	24;11;11;11;11;11;11;10;6;4;4;4;4;1;1	22;9;9;9;9;9;9;8;5;3;3;3;3;0;0
17539	P0DN34	P0DN34				Unspecific	8.45752	7.15121	-4.33947	8.47846	7.01212e-05	+			3	3	3
17575	P11531;H0Y3E8;ENSP00000367977;H0Y864;ENSP00000417725;Q14172;ENSP00000399897;Q14174;ENSP00000395904	P11531	Dystrophin	Dmd		Unspecific	9.60257	8.37668	-4.07233	9.62765	5.13329e-08	+	Arrhythmogenic right ventricular cardiomyopathy (ARVC);Dilated cardiomyopathy (DCM);Hypertrophic cardiomyopathy (HCM);Viral myocarditis	Extracellular matrix organization;Muscle contraction;Non-integrin membrane-ECM interactions;Striated Muscle Contraction	198;10;10;7;7;2;2;2;2	194;10;10;7;7;2;2;2;2	111;0;0;0;0;0;0;0;0
17579	P11680;LRG_129p1;ENSP00000380189;ENSP00000247153;P27918;ENSP00000366204;E9PAQ1	P11680	Properdin	Cfp		Unspecific	9.64219	8.51497	-3.74455	9.67344	4.66562e-07	+	Herpes simplex virus 1 infection	Activation of C3 and C5;Alternative complement activation;Complement cascade;Defective B3GALTL causes Peters-plus syndrome (PpS);Disease;Diseases associated with O-glycosylation of proteins;Diseases of glycosylation;Immune System;Initial triggering of complement;Innate Immune System;Metabolism of proteins;Neutrophil degranulation;O-glycosylation of TSR domain-containing proteins;O-linked glycosyl…	19;2;2;2;2;1;1	19;2;2;2;2;1;1	19;2;2;2;2;1;1
17705	P19246;ENSP00000311997_p.P615L;ENSP00000311997_p.E805A;ENSP00000311997_p.E463K;ENSP00000311997;P12036-2;P12036;ENSP00000311997_p.(A652_K665)del;ENSP00000311997_p.E658_E659del__da0b04;ENSP00000311997_p.E658_E659del;ENSP00000311997_p.K657RfsX10;ENSP00000311997_p.E656RfsX13	P19246	Neurofilament heavy polypeptide	Nefh	;ENSP00000311997_p.P615L;ENSP00000311997_p.E805A;ENSP00000311997_p.E463K;ENSP00000311997_p.(A652_K665)del;ENSP00000311997_p.E656RfsX13;ENSP00000311997_p.E658_E659del;ENSP00000311997_p.E658_E659del__da0b04;ENSP00000311997_p.K657RfsX10;ENSP00000311997_p.P615L;ENSP00000311997_p.E463K;ENSP00000311997_p.E805A;;;ENSP00000311997_p.(A652_K665)del;ENSP00000311997_p.E658_E659del__da0b04;ENSP00000311997_p.E…	Ref	8.57985	6.92886	-5.48447	8.58944	2.2004e-06	+	Amyotrophic lateral sclerosis (ALS)		48;20;20;20;20;20;20;19;19;19;18;18	46;18;18;18;18;18;18;17;17;17;16;16	44;16;16;16;16;16;16;15;15;15;14;14
17723	P20801;ENSP00000361636;P02585;ENSP00000361638;C9J7T9	P20801;ENSP00000361636;P02585;ENSP00000361638;C9J7T9	Troponin C, skeletal muscle	Tnnc2;TNNC2		Unspecific	10.2257	6.95	-10.8817	10.2259	1.03359e-55	+	Calcium signaling pathway	Muscle contraction;Striated Muscle Contraction	14;12;12;10;10	13;11;11;9;9	13;11;11;9;9
17736	P21550;Q5SX59;J3QPZ9;Q5SX60;Q5SX61;K7EP84;ENSP00000467270;ENSP00000430554;E5RJH5	P21550;Q5SX59	Beta-enolase;Enolase	Eno3		Unspecific	10.8377	8.67709	-7.17739	10.8407	1.09428e-25	+	Biosynthesis of amino acids;Carbon metabolism;Glycolysis / Gluconeogenesis;HIF-1 signaling pathway;Metabolic pathways;RNA degradation	Gluconeogenesis;Glucose metabolism;Glycolysis;Metabolism;Metabolism of carbohydrates	40;21;12;8;5;3;3;3;3	34;17;10;6;4;3;3;3;3	6;4;0;2;0;0;0;0;0
17744	P21981;G3UXE8;ENSP00000389466_p.G86W;ENSP00000389466;Q96PF1	P21981	Protein-glutamine gamma-glutamyltransferase 2	Tgm2	;;ENSP00000389466_p.G86W;ENSP00000389466_p.G86W;	Unspecific	9.90263	9.04295	-2.8558	9.95883	2.35531e-05	+			41;6;1;1;1	41;6;1;1;1	37;6;1;1;1
17747	P22437;X6RJD6;ENSP00000411606_p.W8R;ENSP00000411606	P22437	Prostaglandin G/H synthase 1	Ptgs1	;;ENSP00000411606_p.W8R;ENSP00000411606_p.W8R	Unspecific	8.66269	7.5085	-3.83411	8.69212	0.0013661	+	Arachidonic acid metabolism;Metabolic pathways;Platelet activation;Regulation of lipolysis in adipocytes;Serotonergic synapse	Arachidonic acid metabolism;Biological oxidations;COX reactions;Fatty acid metabolism;Metabolism;Metabolism of lipids;Phase I - Functionalization of compounds;Synthesis of Prostaglandins (PG) and Thromboxanes (TX)	23;2;2;2	22;2;2;2	13;0;0;0
17749	P22682;A0A0U1RQ85;A0A0X1KG61;A0A0U1RP17;A0A0U1RNF1;ENSP00000495258;A0A2R8Y647;G3X9U0;LRG_1161p1;ENSP00000494162;Q9ULV8;Q80XL1	P22682;A0A0U1RQ85;A0A0X1KG61	E3 ubiquitin-protein ligase CBL	Cbl		Unspecific	8.39237	7.06629	-4.40514	8.4124	5.50521e-05	+	Endocytosis;Ubiquitin mediated proteolysis		46;45;43;4;2;1;1;1;1;1;1;1	15;15;12;0;2;0;0;0;0;0;0;0	3;3;3;0;0;0;0;0;0;0;0;0
17760	P23611;F7C1A3;E0CZE4;H3BVC2;ENSP00000458047	P23611;F7C1A3	Interferon regulatory factor 8	Irf8		Unspecific	7.0984	5.61961	-4.91244	7.11259	0.000904513	+	Pertussis	Cytokine Signaling in Immune system;Immune System;Interferon alpha/beta signaling;Interferon gamma signaling;Interferon Signaling	10;8;4;3;3	5;5;2;0;0	5;5;2;0;0
17815	P27573;ENSP00000488104;A0A0J9YWT2;ENSP00000431441;E9PL80	P27573	Myelin protein P0	Mpz		Unspecific	9.08398	8.15344	-3.09119	9.13217	7.01363e-05	+	Cell adhesion molecules (CAMs)		13;6;6;3;3	2;0;0;0;0	2;0;0;0;0
17861	Q922W6;P28862;ENSP00000279441_p.R53K;ENSP00000279441_p.G65R;ENSP00000279441;P09238;F5GYX7;ENSP00000441485_p.R53K;ENSP00000441485_p.G65R;ENSP00000441485	Q922W6;P28862	Stromelysin-1	Mmp3	;;ENSP00000279441_p.R53K;ENSP00000279441_p.G65R;ENSP00000279441_p.G65R;ENSP00000279441_p.R53K;;;ENSP00000441485_p.R53K;ENSP00000441485_p.G65R;ENSP00000441485_p.G65R;ENSP00000441485_p.R53K	Unspecific	9.36425	8.07412	-4.28573	9.38597	1.10671e-07	+		Activation of Matrix Metalloproteinases;Collagen degradation;Degradation of the extracellular matrix;Extracellular matrix organization	31;31;3;3;3;3;2;2;2;2	31;31;3;3;3;3;2;2;2;2	20;20;1;1;1;1;0;0;0;0
17871	Q3UPN1;P29533;P29533-2;A0A0G2JFP9;ENSP00000359133;E9PDD2	Q3UPN1;P29533;P29533-2;A0A0G2JFP9	Vascular cell adhesion protein 1	Vcam1		Unspecific	8.5447	7.41155	-3.76422	8.57554	0.000865527	+	African trypanosomiasis;AGE-RAGE signaling pathway in diabetic complications;Cell adhesion molecules (CAMs);Fluid shear stress and atherosclerosis;Leukocyte transendothelial migration;Malaria;NF-kappa B signaling pathway;TNF signaling pathway	Adaptive Immune System;Cytokine Signaling in Immune system;Extracellular matrix organization;Immune System;Immunoregulatory interactions between a Lymphoid and a non-Lymphoid cell;Integrin cell surface interactions;Interferon gamma signaling;Interferon Signaling;Interleukin-4 and Interleukin-13 signaling;Signaling by Interleukins	27;27;15;14;2;2	27;27;15;14;2;2	25;25;14;13;0;0
17916	P32848;ENSP00000386089;B1AH72	P32848	Parvalbumin alpha	Pvalb		Unspecific	10.2666	6.493	-12.5356	10.2667	5.8382e-73	+		Gene expression (Transcription);Generic Transcription Pathway;RNA Polymerase II Transcription;Transcriptional Regulation by MECP2	25;1;1	25;1;1	21;0;0
17919	P33175;ENSP00000408979_p.K446Q;ENSP00000408979;Q12840;J3KNA1;ENSP00000286452_p.K357Q;ENSP00000286452;ENSP00000393270;C9JWB9;ENSP00000393270_p.G11W	P33175;ENSP00000408979_p.K446Q;ENSP00000408979;Q12840;J3KNA1;ENSP00000286452_p.K357Q;ENSP00000286452	Kinesin heavy chain isoform 5A	Kif5a;KIF5A	;ENSP00000408979_p.K446Q;ENSP00000408979_p.K446Q;;;ENSP00000286452_p.K357Q;ENSP00000286452_p.K357Q;ENSP00000393270_p.G11W;;ENSP00000393270_p.G11W	Ref	8.44959	7.40948	-3.4552	8.48749	0.00134713	+	Dopaminergic synapse;Endocytosis	Adaptive Immune System;COPI-dependent Golgi-to-ER retrograde traffic;Factors involved in megakaryocyte development and platelet production;Golgi-to-ER retrograde transport;Hemostasis;Immune System;Insulin processing;Intra-Golgi and retrograde Golgi-to-ER traffic;Kinesins;Membrane Trafficking;Metabolism of proteins;MHC class II antigen presentation;Peptide hormone metabolism;RHO GTPase Effectors;R…	29;28;28;28;25;25;25;2;2;1	8;7;7;7;6;6;6;1;1;1	6;5;5;5;5;5;5;0;0;0
17958	P35564;ENSP00000426052;D6RHJ3;ENSP00000427115;D6RD16	P35564	Calnexin	Canx		Unspecific	9.7537	9.1045	-2.15659	9.84158	0.0010349	+	Antigen processing and presentation;Human T-cell leukemia virus 1 infection;Phagosome;Protein processing in endoplasmic reticulum;Thyroid hormone synthesis	Adaptive Immune System;Antigen Presentation: Folding, assembly and peptide loading of class I MHC;Asparagine N-linked glycosylation;Assembly of Viral Components at the Budding Site;Calnexin/calreticulin cycle;Class I MHC mediated antigen processing & presentation;Cytokine Signaling in Immune system;Disease;Immune System;Infectious disease;Influenza Infection;Influenza Life Cycle;Interleukin-12 fa…	57;2;2;2;2	29;0;0;0;0	29;0;0;0;0
17961	P35585;ENSP00000411498;E7ENJ6;K7ENA7;ENSP00000466858;D3YZ71;A0A1D5RLW6;K7EPJ8;ENSP00000467417;K7ER75;ENSP00000468140;S4R1Q4;ENSP00000482949;A0A087WZX7;A0A0R4IZX6;A0A0R4J1L4;Q9WVP1;Q9WVP1-2;K7EJJ1;ENSP00000465193;K7EQ90;ENSP00000467721;K7EPR4;ENSP00000467498;A0A1L1SUA0;ENSP00000465488;K7EK69;A0A1D5RLL9;A0A1D5RMJ1;K7ERH5;ENSP00000468260;ENSP00000465865_p.C114LfsX10;K7EL08;ENSP00000465865;A0A1L1SQU9	P35585;ENSP00000411498;E7ENJ6	AP-1 complex subunit mu-1	Ap1m1;AP1M1	;;;;;;;;;;;;;;;;;;;;;;;;;;;;;;;ENSP00000465865_p.C114LfsX10;;ENSP00000465865_p.C114LfsX10;	Unspecific	8.0955	6.32797	-5.8716	8.10286	0.00100246	+	Human immunodeficiency virus 1 infection;Lysosome	Adaptive Immune System;Disease;Golgi Associated Vesicle Biogenesis;HIV Infection;Host Interactions of HIV factors;Immune System;Infectious disease;Innate Immune System;Lysosome Vesicle Biogenesis;Membrane Trafficking;MHC class II antigen presentation;Nef mediated downregulation of MHC class I complex cell surface expression;Nef-mediates down modulation of cell surface receptors by recruiting them…	32;29;29;9;9;9;7;6;6;5;5;5;5;5;5;5;5;5;4;4;3;3;3;3;2;1;1;1;1;1;1;1;1;1;1	1;0;0;0;0;0;0;0;0;0;0;0;0;0;0;0;0;0;0;0;0;0;0;0;0;0;0;0;0;0;0;0;0;0;0	1;0;0;0;0;0;0;0;0;0;0;0;0;0;0;0;0;0;0;0;0;0;0;0;0;0;0;0;0;0;0;0;0;0;0
18067	P47757;ENSP00000364284;P47756	P47757;ENSP00000364284;P47756	F-actin-capping protein subunit beta	Capzb;CAPZB		Unspecific	8.3224	6.25603	-6.86431	8.32611	5.39697e-07	+	Endocytosis	Adaptive Immune System;Asparagine N-linked glycosylation;Cellular responses to external stimuli;Cellular responses to stress;COPI-independent Golgi-to-ER retrograde traffic;COPI-mediated anterograde transport;ER to Golgi Anterograde Transport;Factors involved in megakaryocyte development and platelet production;Golgi-to-ER retrograde transport;Hemostasis;HSP90 chaperone cycle for steroid hormone …	32;29;29	4;1;1	4;1;1
18090	P48025;E9PWE9;ENSP00000306678_p.V97G;ENSP00000306678_p.I96S;ENSP00000306678_p.I96M;ENSP00000306678_p.H490R;ENSP00000306678_p.H367Q;ENSP00000306678_p.G442R;ENSP00000306678_p.G318R;ENSP00000306678_p.E713K;ENSP00000306678_p.A239T;ENSP00000306678;Q8BZ25;Q8NFD2	P48025;E9PWE9	Tyrosine-protein kinase SYK;Tyrosine-protein kinase	Syk	;;ENSP00000306678_p.V97G;ENSP00000306678_p.I96S;ENSP00000306678_p.I96M;ENSP00000306678_p.H490R;ENSP00000306678_p.H367Q;ENSP00000306678_p.G442R;ENSP00000306678_p.G318R;ENSP00000306678_p.E713K;ENSP00000306678_p.A239T;ENSP00000306678_p.G318R;ENSP00000306678_p.G442R;ENSP00000306678_p.H490R;ENSP00000306678_p.I96S;ENSP00000306678_p.I96M;ENSP00000306678_p.V97G;ENSP00000306678_p.A239T;ENSP00000306678_p.H…	Unspecific	8.76927	7.76933	-3.32173	8.81067	0.000578344	+			40;37;1;1;1;1;1;1;1;1;1;1;1;1	15;12;0;0;0;0;0;0;0;0;0;0;0;0	15;12;0;0;0;0;0;0;0;0;0;0;0;0
18139	P50285;Q3UNX7;D3Z0T2;A0A0A6YVP9;Q8C9C1;ENSP00000481732;ENSP00000356724;ENSP00000346901;Q01740;ENSP00000491035;A0A1W2PNR8;ENSP00000385543;Q01740-2	P50285;Q3UNX7	Dimethylaniline monooxygenase [N-oxide-forming] 1	Fmo1		Unspecific	8.42979	6.14848	-7.57835	8.43206	1.0706e-11	+	Drug metabolism - cytochrome P450	Biological oxidations;FMO oxidises nucleophiles;Metabolism;Phase I - Functionalization of compounds	20;12;9;9;6;4;4;4;4;3;3;3;3	20;12;9;9;6;4;4;4;4;3;3;3;3	20;12;9;9;6;4;4;4;4;3;3;3;3
18193	P52624;E9Q5K7;Q5SUC6;E9Q391;F6YBT6;A0A2R8VHC9;ENSP00000005756;Q8R093;ENSP00000474090;O95045;Q8CGR7;O95045-2	P52624;E9Q5K7	Uridine phosphorylase 1	Upp1		Unspecific	8.70514	6.74868	-6.49921	8.70991	1.16431e-07	+	Drug metabolism - other enzymes;Metabolic pathways;Pyrimidine metabolism	Metabolism;Metabolism of nucleotides;Nucleobase catabolism;Nucleotide salvage;Pyrimidine catabolism;Pyrimidine salvage	15;8;7;6;5;1;1;1;1;1;1;1	13;8;7;6;5;1;1;1;1;1;1;1	13;8;7;6;5;1;1;1;1;1;1;1
18254	P55302;F6WMD1;ENSP00000421648_p.V98I;ENSP00000421648;D6REW6	P55302	Alpha-2-macroglobulin receptor-associated protein	Lrpap1	;;ENSP00000421648_p.V98I;ENSP00000421648_p.V98I;	Unspecific	9.25111	8.52096	-2.42551	9.32525	0.00138834	+	Cholesterol metabolism		27;11;4;4;4	21;9;0;0;0	21;9;0;0;0
18350	P62631;ENSP00000217182;ENSP00000298049;A0A2U3TZH3;Q05639;ENSP00000493767;A0A2R8Y488;ENSP00000494971;A0A2R8Y660;ENSP00000494752;A0A2R8YDN5	P62631;ENSP00000217182;ENSP00000298049;A0A2U3TZH3;Q05639	Elongation factor 1-alpha 2	Eef1a2;EEF1A2		Unspecific	9.77383	6.87682	-9.62365	9.77438	5.47415e-35	+	Legionellosis;Leishmaniasis;RNA transport	Eukaryotic Translation Elongation;Metabolism of proteins;Translation	40;39;39;39;39;17;17;12;12;9;9	20;19;19;19;19;5;5;2;2;2;2	20;19;19;19;19;5;5;2;2;2;2
18439	Q4FE56;P70398;E9PWA9;G3UZS3;ENSP00000406876;H7C2M9	Q4FE56;P70398	Ubiquitin carboxyl-terminal hydrolase;Probable ubiquitin carboxyl-terminal hydrolase FAF-X	Usp9x		Unspecific	8.62232	6.91704	-5.66483	8.6308	1.05438e-06	+			127;127;42;8;3;3	18;18;3;2;0;0	16;16;1;2;0;0
18468	P79483	P79483	HLA class II histocompatibility antigen, DR beta 3 chain	HLA-DRB3		Unspecific	9.29311	7.40046	-6.28725	9.29864	3.45998e-14	+			13	11	4
18559	P97823;J3QP56;P97823-2;D3YUG4;ENSP00000428306;E5RJ48;D3Z269;D3Z111;ENSP00000430791;E5RI35	P97823;J3QP56;P97823-2;D3YUG4;ENSP00000428306;E5RJ48;D3Z269;D3Z111	Acyl-protein thioesterase 1	Lypla1;LYPLA1		Unspecific	8.78835	7.6523	-3.77385	8.81899	0.000104726	+	Choline metabolism in cancer;Glycerophospholipid metabolism	eNOS activation;Metabolism;Metabolism of nitric oxide: eNOS activation and regulation	7;6;6;5;4;4;4;4;2;2	3;2;2;1;0;0;0;2;0;0	3;2;2;1;0;0;0;2;0;0
18561	P97855;ENSP00000486887;ENSP00000430045;ENSP00000429316;E5RH00	P97855	Ras GTPase-activating protein-binding protein 1	G3bp1		Unspecific	8.9082	7.30369	-5.33004	8.91886	2.44496e-08	+			28;3;3;3;3	7;0;0;0;0	7;0;0;0;0
18827	Q3TDD9;Q3TDD9-2;F8W7E1;ENSP00000410955;F8WBY8;ENSP00000406283	Q3TDD9	Protein phosphatase 1 regulatory subunit 21	Ppp1r21		Unspecific	8.39361	6.92829	-4.86767	8.40823	9.16902e-06	+			47;11;2;2;2;2	20;5;0;0;0;0	20;5;0;0;0;0
18884	Q3TRM8;E9Q8S8;E9Q3Z4;D6RFA3;D3Z2E4;ENSP00000402840;C9JQD1;A0A5F9ZGW4;ENSP00000482149;ENSP00000379142;ENSP00000384247;ENSP00000223366;A0A5F9ZHE0;P35557-3;P52792-2;P52792;P35557;P35557-2	Q3TRM8;E9Q8S8;E9Q3Z4	Hexokinase-3	Hk3		Unspecific	9.56584	8.27195	-4.2982	9.58737	1.43509e-11	+	Amino sugar and nucleotide sugar metabolism;Carbon metabolism;Central carbon metabolism in cancer;Galactose metabolism;Glucagon signaling pathway;Glycolysis / Gluconeogenesis;Insulin secretion;Insulin signaling pathway;Maturity onset diabetes of the young;Metabolic pathways;Neomycin, kanamycin and gentamicin biosynthesis;Prolactin signaling pathway;Starch and sucrose metabolism;Type II diabetes m…	Defective GCK causes maturity-onset diabetes of the young 2 (MODY2);Defective TPR may confer susceptibility towards thyroid papillary carcinoma (TPC);Developmental Biology;Disease;Disorders of transmembrane transporters;FOXO-mediated transcription;FOXO-mediated transcription of oxidative stress, metabolic and neuronal genes;Gene expression (Transcription);Generic Transcription Pathway;Glucose met…	45;42;41;10;4;1;1;1;1;1;1;1;1;1;1;1;1;1	43;40;39;10;4;1;1;1;1;1;1;1;1;1;1;1;1;1	32;30;28;10;4;1;1;1;1;1;1;1;1;1;1;1;1;1
19061	Q3UHX2;F8WBW6;ENSP00000486021;ENSP00000411287	Q3UHX2	28 kDa heat- and acid-stable phosphoprotein	Pdap1		Unspecific	9.46034	8.18856	-4.22478	9.48297	3.00061e-11	+		Immune System;Innate Immune System;Neutrophil degranulation	19;1;1;1	3;0;0;0	3;0;0;0
19175	Q3V1D3;A0A0G2JFD4;ENSP00000430075_p.H294N;ENSP00000430075;P23109;ENSP00000358551_p.H290N;ENSP00000358551;ENSP00000430075_p.H688Y;P23109-2;ENSP00000358551_p.H684Y;H3BIY4;ENSP00000489753;A0A1B0GTL6	Q3V1D3;A0A0G2JFD4;ENSP00000430075_p.H294N;ENSP00000430075;P23109;ENSP00000358551_p.H290N;ENSP00000358551;ENSP00000430075_p.H688Y;P23109-2;ENSP00000358551_p.H684Y	AMP deaminase 1	Ampd1;AMPD1	;;ENSP00000430075_p.H294N;ENSP00000430075_p.H688Y;ENSP00000430075_p.H294N;;ENSP00000358551_p.H290N;ENSP00000358551_p.H684Y;ENSP00000358551_p.H290N;ENSP00000430075_p.H688Y;;ENSP00000358551_p.H684Y;;;	Ref	9.78605	6.50735	-10.8916	9.78628	5.11845e-44	+	Metabolic pathways;Purine metabolism	Metabolism;Metabolism of nucleotides;Nucleotide salvage;Purine salvage	46;39;28;28;28;27;27;27;27;26;10;3;3	46;39;28;28;28;27;27;27;27;26;10;3;3	35;29;21;21;21;20;20;20;20;19;9;0;0
19271	Q5DTJ9;LRG_410p1_p.V393A;LRG_410p1_p.S803R;LRG_410p1_p.S707N;LRG_410p1_p.S691N;LRG_410p1_p.F628L;LRG_410p1;ENSP00000441668_p.V393A;ENSP00000441668_p.S803R;ENSP00000441668_p.S707N;ENSP00000441668_p.S691N;ENSP00000441668_p.F628L;ENSP00000441668;ENSP00000351790_p.V393A;ENSP00000351790_p.S803R;ENSP00000351790_p.S707N;ENSP00000351790_p.S691N;ENSP00000351790_p.F628L;ENSP00000351790;Q86TC9;ENSP000004807…	Q5DTJ9	Myopalladin	Mypn	;LRG_410p1_p.V393A;LRG_410p1_p.S803R;LRG_410p1_p.S707N;LRG_410p1_p.S691N;LRG_410p1_p.F628L;LRG_410p1_p.P1135T;LRG_410p1_p.F628L;LRG_410p1_p.S691N;LRG_410p1_p.S707N;LRG_410p1_p.S803R;LRG_410p1_p.V393A;ENSP00000441668_p.V393A;ENSP00000441668_p.S803R;ENSP00000441668_p.S707N;ENSP00000441668_p.S691N;ENSP00000441668_p.F628L;ENSP00000441668_p.P1135T;ENSP00000441668_p.F628L;ENSP00000441668_p.S691N;ENSP00…	Ref	8.7452	7.70763	-3.44672	8.78331	0.000367197	+			43;13;13;13;13;13;13;13;13;13;13;13;13;13;13;13;13;13;13;13;12;12;12;12;12;12;12;12;12;12;12;12;12;12;12;12;12;11;11;9;2;2;2	42;12;12;12;12;12;12;12;12;12;12;12;12;12;12;12;12;12;12;12;11;11;11;11;11;11;11;11;11;11;11;11;11;11;11;11;11;10;10;8;2;2;2	42;12;12;12;12;12;12;12;12;12;12;12;12;12;12;12;12;12;12;12;11;11;11;11;11;11;11;11;11;11;11;11;11;11;11;11;11;10;10;8;2;2;2
19337	Q5S006;ENSP00000398726_p.I471V;ENSP00000398726;C9JBF0	Q5S006	Leucine-rich repeat serine/threonine-protein kinase 2	Lrrk2	;ENSP00000398726_p.I471V;ENSP00000398726_p.N299K;ENSP00000398726_p.I471V;	Alt	8.26141	5.88607	-7.89073	8.26324	1.11552e-06	+	Parkinson disease	PTK6 promotes HIF1A stabilization;Signal Transduction;Signaling by Non-Receptor Tyrosine Kinases;Signaling by PTK6	48;1;1;1	48;1;1;1	36;0;0;0
19371	Q5SVJ0;P28652;Q5SVI0;Q5SVI2;Q68EG2;Q5SVI1;Q5SVI3;ENSP00000379098_p.E510K;ENSP00000379098;Q13554;Q5SVI9;Q5SVJ1;ENSP00000397937;ENSP00000326375;Q13554-2;ENSP00000326518;ENSP00000326427;ENSP00000351542;ENSP00000258682;ENSP00000390292;ENSP00000379096;Q13554-7;Q13554-4;Q13554-3;Q13554-8;Q13554-5;ENSP00000326544;Q13554-6;H7BXS4;ENSP00000326600;ENSP00000388951;H7BZC6;H7C394;ENSP00000410445;ENSP000004003…	Q5SVJ0;P28652;Q5SVI0;Q5SVI2;Q68EG2;Q5SVI1;Q5SVI3;ENSP00000379098_p.E510K;ENSP00000379098;Q13554;Q5SVI9;Q5SVJ1;ENSP00000397937;ENSP00000326375;Q13554-2;ENSP00000326518;ENSP00000326427;ENSP00000351542;ENSP00000258682;ENSP00000390292;ENSP00000379096;Q13554-7;Q13554-4;Q13554-3;Q13554-8;Q13554-5;ENSP00000326544;Q13554-6	Calcium/calmodulin-dependent protein kinase type II subunit beta	Camk2b;CAMK2B	;;;;;;;ENSP00000379098_p.E510K;ENSP00000379098_p.E510K;;;;;;;;;;;;;;;;;;;;;;;;;;;;;;ENSP00000388445_p.W175X;ENSP00000388445_p.W175X;;;	Unspecific	9.01398	7.11046	-6.32334	9.01937	5.66437e-15	+	Adrenergic signaling in cardiomyocytes;Aldosterone synthesis and secretion;Amphetamine addiction;Axon guidance;Calcium signaling pathway;cAMP signaling pathway;Cholinergic synapse;Circadian entrainment;Cushing syndrome;Dopaminergic synapse;ErbB signaling pathway;Gastric acid secretion;Glioma;Glucagon signaling pathway;GnRH signaling pathway;HIF-1 signaling pathway;Inflammatory mediator regulation…	Activation of NMDA receptors and postsynaptic events;Assembly and cell surface presentation of NMDA receptors;Ca-dependent events;Calmodulin induced events;CaM pathway;CaMK IV-mediated phosphorylation of CREB;Cardiac conduction;Cellular response to heat stress;Cellular responses to external stimuli;Cellular responses to stress;CREB1 phosphorylation through NMDA receptor-mediated activation of RAS…	32;28;27;27;27;27;26;26;26;26;25;25;25;25;25;24;24;24;24;24;24;24;24;24;24;24;22;22;15;15;11;11;8;8;5;5;4;4;4;4;4;3;3	27;23;22;22;22;22;21;21;21;21;20;20;20;20;20;19;19;19;19;19;19;19;19;19;19;19;17;17;11;11;9;9;8;8;3;3;3;3;3;3;3;1;1	20;16;15;15;15;15;14;14;14;14;13;13;13;13;13;12;12;12;12;12;12;12;12;12;12;12;10;10;8;8;6;6;4;4;3;3;3;3;3;3;3;1;1
19519	Q61093;E9Q7S3;E9Q802;ENSP00000362055_p.F185del;Q5H9D4;ENSP00000362055;ENSP00000217885;ENSP00000362057;Q9Y5S8-2;Q8CIZ9-3;Q9Y5S8-3;Q8CIZ9-2;Q9Y5S8;Q8CIZ9	Q61093	Cytochrome b-245 heavy chain	Cybb	;;;ENSP00000362055_p.F185del;;ENSP00000362055_p.F185del;;;;;;;;	Unspecific	9.60969	8.26042	-4.48219	9.6287	2.59085e-09	+	AGE-RAGE signaling pathway in diabetic complications;Fluid shear stress and atherosclerosis;Osteoclast differentiation	RHO GTPase Effectors;RHO GTPases Activate NADPH Oxidases;Signal Transduction;Signaling by Rho GTPases	27;4;4;1;1;1;1;1;1;1;1;1;1;1	27;4;4;1;1;1;1;1;1;1;1;1;1;1	9;0;0;0;0;0;0;0;0;0;0;0;0;0
19695	Q62407;E9QQ25;A0A087WSE3;Q62407-4;Q62407-3;Q62407-2;A0A0R4J1J0;ENSP00000379920;ENSP00000379919;ENSP00000379917;Q15772-4;Q15772-3;ENSP00000410986_p.P168S;ENSP00000410986;C9J8D8;ENSP00000390353;H7BZM6	Q62407;E9QQ25;A0A087WSE3;Q62407-4;Q62407-3	Striated muscle-specific serine/threonine-protein kinase	Speg	;;;;;;;;;;;;ENSP00000410986_p.P168S;ENSP00000410986_p.P168S;;;	Unspecific	9.07247	7.15452	-6.37132	9.07769	3.5996e-15	+			134;132;127;104;104;34;9;8;8;8;8;8;5;5;5;5;5	134;132;127;104;104;34;9;8;8;8;8;8;5;5;5;5;5	65;63;59;54;54;8;1;0;0;0;0;0;0;0;0;0;0
19742	Q64324;M0R0D4;ENSP00000471161;ENSP00000471161_p.G17R;A0A140LJH9;A0A140LHM1	Q64324	Syntaxin-binding protein 2	Stxbp2	;;ENSP00000471161_p.G17R;ENSP00000471161_p.G17R;;	Ref	8.50418	7.13214	-4.55784	8.52224	3.09909e-05	+		Cytokine Signaling in Immune system;Hemostasis;Immune System;Other interleukin signaling;Platelet activation, signaling and aggregation;Platelet degranulation;Response to elevated platelet cytosolic Ca2+;Signaling by Interleukins	30;4;4;3;2;1	11;0;0;0;0;0	2;0;0;0;0;0
19897	Q6NZM9;Q6NZM9-2;A0A087WQ92;A0A087WSF0;F5H0B1;ENSP00000438111	Q6NZM9;Q6NZM9-2	Histone deacetylase 4	Hdac4		Unspecific	7.72395	5.59915	-7.05844	7.72719	0.000223998	+	Alcoholism;Apelin signaling pathway;MicroRNAs in cancer;Viral carcinogenesis	Constitutive Signaling by NOTCH1 HD+PEST Domain Mutants;Constitutive Signaling by NOTCH1 PEST Domain Mutants;Disease;Diseases of signal transduction;Gene expression (Transcription);Generic Transcription Pathway;Metabolism of proteins;NOTCH1 Intracellular Domain Regulates Transcription;Notch-HLH transcription pathway;Post-translational protein modification;RNA Polymerase II Transcription;RUNX2 reg…	30;23;7;5;2;2	9;8;2;1;0;0	9;8;2;1;0;0
20027	Q6PIE5;D3YYN7;ENSP00000376066;B1AKY9;LRG_6p1;ENSP00000354490;P50993;ENSP00000411705;H0Y7C1;ENSP00000434272_p.V146I;ENSP00000434272_p.G83D;ENSP00000434272;E9PRA5;Q91WH7;E9QNX7;Q64436	Q6PIE5;D3YYN7;ENSP00000376066;B1AKY9;LRG_6p1;ENSP00000354490;P50993;ENSP00000411705;H0Y7C1	Sodium/potassium-transporting ATPase subunit alpha-2	Atp1a2;ATP1A2	;;;;;;;;;ENSP00000434272_p.V146I;ENSP00000434272_p.G83D;ENSP00000434272_p.G83D;ENSP00000434272_p.V146I;;;;	Unspecific	9.31425	6.37295	-9.77078	9.31474	8.9575e-31	+	Adrenergic signaling in cardiomyocytes;Aldosterone synthesis and secretion;Aldosterone-regulated sodium reabsorption;Bile secretion;cAMP signaling pathway;Carbohydrate digestion and absorption;Cardiac muscle contraction;cGMP-PKG signaling pathway;Endocrine and other factor-regulated calcium reabsorption;Gastric acid secretion;Insulin secretion;Mineral absorption;Pancreatic secretion;Protein diges…	Cardiac conduction;Ion channel transport;Ion homeostasis;Ion transport by P-type ATPases;Muscle contraction;Transport of small molecules	65;62;58;58;58;58;58;42;42;8;8;8;8;5;5;5	46;43;40;40;40;40;40;26;26;3;3;3;3;0;0;0	40;37;34;34;34;34;34;23;23;0;0;0;0;0;0;0
20181	Q7TQ48;Q7TQ48-2;ENSP00000440350;ENSP00000382518_p.E29K;ENSP00000382518;Q86TD4-3;Q86TD4-2;Q86TD4	Q7TQ48;Q7TQ48-2	Sarcalumenin	Srl	;;;ENSP00000382518_p.E29K;ENSP00000382518_p.E29K;;;	Unspecific	10.1747	7.10065	-10.2118	10.1751	2.11049e-49	+			51;39;24;24;24;24;24;24	51;39;24;24;24;24;24;24	51;39;24;24;24;24;24;24
20188	Q7TQH0-2;A0A0U1RPL0;Q7TQH0-3;Q7TQH0;Q3TGG2;E9Q5Q0;J3QP59;H3BRB0;ENSP00000456162;ENSP00000454757;A0A0C4DGL7	Q7TQH0-2;A0A0U1RPL0;Q7TQH0-3;Q7TQH0;Q3TGG2;E9Q5Q0	Ataxin-2-like protein	Atxn2l		Unspecific	8.32365	6.82398	-4.98182	8.33718	0.000227296	+	NA		59;57;57;56;51;48;13;3;3;3;3	20;20;20;19;12;12;1;0;0;0;0	20;20;20;19;12;12;1;0;0;0;0
20203	Q7TSH2;F7DF70;E0CXM1;E0CZ55;ENSP00000458446;I3L0Z1;E0CY30	Q7TSH2	Phosphorylase b kinase regulatory subunit beta	Phkb		Unspecific	9.22666	7.99754	-4.08307	9.25156	1.07131e-05	+	Calcium signaling pathway;Glucagon signaling pathway;Insulin signaling pathway	Glycogen breakdown (glycogenolysis);Glycogen metabolism;Metabolism;Metabolism of carbohydrates	60;12;9;9;4;4;1	60;12;9;9;4;4;1	27;8;1;1;0;0;1
20209	Q7TSQ8;D6RD07;D3Z443;H3BU60;ENSP00000457484;ENSP00000457484_p.N20K	Q7TSQ8;D6RD07	Pyruvate dehydrogenase phosphatase regulatory subunit, mitochondrial	Pdpr	;;;;ENSP00000457484_p.N20K;ENSP00000457484_p.N20K	Ref	8.376	5.96064	-8.02367	8.37767	5.61994e-09	+		Metabolism;Pyruvate metabolism;Pyruvate metabolism and Citric Acid (TCA) cycle;Regulation of pyruvate dehydrogenase (PDH) complex;The citric acid (TCA) cycle and respiratory electron transport	35;28;6;2;2;1	18;14;4;0;0;0	18;14;4;0;0;0
20216	Q7TT50;A0A1Y7VKD5;A0A1Y7VLI0;A0A1Y7VM95;ENSP00000489452;A0A0U1RRC3	Q7TT50	Serine/threonine-protein kinase MRCK beta	Cdc42bpb		Unspecific	8.43847	7.33957	-3.65046	8.47175	0.000735997	+			82;11;9;7;4;4	31;1;6;4;0;0	30;1;6;4;0;0
20304	Q80VQ0;ENSP00000477789;A0A087WTE0;F6QPV9	Q80VQ0	Aldehyde dehydrogenase family 3 member B1	Aldh3b1		Unspecific	8.93063	7.88392	-3.47709	8.96797	0.000184652	+	beta-Alanine metabolism;Chemical carcinogenesis;Drug metabolism - cytochrome P450;Glycolysis / Gluconeogenesis;Histidine metabolism;Metabolic pathways;Metabolism of xenobiotics by cytochrome P450;Phenylalanine metabolism;Tyrosine metabolism	Immune System;Innate Immune System;Metabolism;Metabolism of lipids;Neutrophil degranulation;Sphingolipid de novo biosynthesis;Sphingolipid metabolism	26;2;2;1	26;2;2;1	18;0;0;0
20429	Q8BG07-2;Q8BG07;ENSP00000497627_p.E27Q;ENSP00000497627;A0A3B3IT68;ENSP00000376372_p.E27Q;ENSP00000376372;F5H2B5;ENSP00000438677_p.E34Q;ENSP00000438677;Q96BZ4;G3V3J8;ENSP00000451278_p.E27Q;ENSP00000451278	Q8BG07-2;Q8BG07	Phospholipase D4	Pld4	;;ENSP00000497627_p.E27Q;ENSP00000497627_p.E27Q;;ENSP00000376372_p.E27Q;ENSP00000376372_p.E27Q;;ENSP00000438677_p.E34Q;ENSP00000438677_p.E34Q;;;ENSP00000451278_p.E27Q;ENSP00000451278_p.E27Q	Unspecific	8.92914	7.91274	-3.3764	8.96907	0.000273423	+	Ether lipid metabolism;Glycerophospholipid metabolism;Metabolic pathways	Fcgamma receptor (FCGR) dependent phagocytosis;Glycerophospholipid biosynthesis;Immune System;Innate Immune System;Inositol phosphate metabolism;Metabolism;Metabolism of lipids;Phospholipid metabolism;Role of phospholipids in phagocytosis;Synthesis of IP3 and IP4 in the cytosol;Synthesis of PG	15;15;2;2;2;2;2;2;2;2;2;1;1;1	15;15;2;2;2;2;2;2;2;2;2;1;1;1	15;15;2;2;2;2;2;2;2;2;2;1;1;1
20510	Q8BH61;ENSP00000394693;H0Y4W5	Q8BH61	Coagulation factor XIII A chain	F13a1		Unspecific	10.3375	9.716	-2.0645	10.4306	0.00121164	+	Complement and coagulation cascades	Common Pathway of Fibrin Clot Formation;Cytokine Signaling in Immune system;Formation of Fibrin Clot (Clotting Cascade);Hemostasis;Immune System;Interleukin-4 and Interleukin-13 signaling;Platelet activation, signaling and aggregation;Platelet degranulation;Response to elevated platelet cytosolic Ca2+;Signaling by Interleukins	57;1;1	57;1;1	47;0;0
20896	Q8C0E2;Q8C0E2-2;ENSP00000486811;A0A0D9SFQ6	Q8C0E2;Q8C0E2-2	Vacuolar protein sorting-associated protein 26B	Vps26b		Unspecific	9.23183	8.11345	-3.71516	9.2637	5.58009e-05	+	Endocytosis		27;16;1;1	3;1;0;0	3;1;0;0
21210	Q8JZQ2;ENSP00000467236;K7EP56	Q8JZQ2	AFG3-like protein 2	Afg3l2		Unspecific	9.00346	7.34858	-5.49741	9.01297	9.29237e-09	+	NA	Mitochondrial calcium ion transport;Processing of SMDT1;Transport of small molecules	54;16;16	9;0;0	9;0;0
21269	Q8K1B8;A0A494B9W3;A0A494BBJ8;H0YFT5;ENSP00000440209_p.R46Q;ENSP00000440209;A0A494B9F7	Q8K1B8;A0A494B9W3;A0A494BBJ8	Fermitin family homolog 3	Fermt3	;;;;ENSP00000440209_p.R46Q;ENSP00000440209_p.R46Q;	Unspecific	10.0355	8.95797	-3.57959	10.0704	1.89955e-07	+	Platelet activation	Hemostasis;Platelet activation, signaling and aggregation;Platelet degranulation;Response to elevated platelet cytosolic Ca2+	60;46;33;9;9;9;7	60;46;33;9;9;9;7	24;20;12;0;0;0;2
21324	Q8K2I3;D3YVR1;ENSP00000487216_p.D36G;ENSP00000487216;A0A0D9SG76	Q8K2I3	Dimethylaniline monooxygenase [N-oxide-forming] 2	Fmo2	;;ENSP00000487216_p.D36G;ENSP00000487216_p.D36G;	Unspecific	8.21123	6.00565	-7.32676	8.21392	5.88186e-06	+	Drug metabolism - cytochrome P450	Biological oxidations;FMO oxidises nucleophiles;Metabolism;Phase I - Functionalization of compounds	18;4;1;1;1	18;4;1;1;1	15;3;0;0;0
21404	Q8NEY1-2;ENSP00000356265;Q8NEY1-3;Q8NEY1;ENSP00000356265_p.S1273L;ENSP00000356265_p.S488N;ENSP00000356265_p.D1704Y;Q8NEY1-6;ENSP00000405437;H0Y6F6;ENSP00000405437_p.S45N;A0A087WSM9	Q8NEY1-2;ENSP00000356265;Q8NEY1-3;Q8NEY1;ENSP00000356265_p.S1273L;ENSP00000356265_p.S488N;ENSP00000356265_p.D1704Y;Q8NEY1-6	Neuron navigator 1	NAV1	;ENSP00000356265_p.D1704Y;ENSP00000356265_p.S1273L;ENSP00000356265_p.S488N;;;ENSP00000356265_p.S1273L;ENSP00000356265_p.S488N;ENSP00000356265_p.D1704Y;;ENSP00000405437_p.S45N;;ENSP00000405437_p.S45N;	Ref	8.13186	9.197	3.53833	9.23286	0.000409207	+			111;110;110;110;109;109;107;73;39;39;38;7	111;110;110;110;109;109;107;73;39;39;38;7	1;0;0;0;0;0;0;1;1;1;1;1
21481	Q8R1S0;D3YW66;D6RG57;F6ZE40;G3V4A6;ENSP00000450511;ENSP00000450511_p.P72L	Q8R1S0;D3YW66	Ubiquinone biosynthesis monooxygenase COQ6	Coq6	;;;;;ENSP00000450511_p.P72L;ENSP00000450511_p.P72L	Ref	7.58652	5.47571	-7.01197	7.58987	0.000230592	+	Metabolic pathways;Ubiquinone and other terpenoid-quinone biosynthesis	Metabolism;Metabolism of cofactors;Metabolism of vitamins and cofactors;Ubiquinol biosynthesis	16;10;7;5;4;4;1	8;5;3;1;0;0;0	8;5;3;1;0;0;0
21558	Q8R429;ENSP00000378879_p.I99L;ENSP00000378879;ENSP00000349595_p.I99L;ENSP00000349595;O14983-2;O14983;ENSP00000443101;O14983-3;ENSP00000457357;H3BTW4;F6RQN3;H3BTF1;ENSP00000457148	Q8R429;ENSP00000378879_p.I99L;ENSP00000378879;ENSP00000349595_p.I99L;ENSP00000349595;O14983-2;O14983;ENSP00000443101;O14983-3	Sarcoplasmic/endoplasmic reticulum calcium ATPase 1	Atp2a1;ATP2A1	;ENSP00000378879_p.I99L;ENSP00000378879_p.I99L;ENSP00000349595_p.I99L;ENSP00000349595_p.I99L;;;;;;;;;	Unspecific	11.2278	9.35866	-6.20907	11.2336	8.53196e-20	+	Adrenergic signaling in cardiomyocytes;Alzheimer disease;Arrhythmogenic right ventricular cardiomyopathy (ARVC);Calcium signaling pathway;cAMP signaling pathway;Cardiac muscle contraction;cGMP-PKG signaling pathway;Dilated cardiomyopathy (DCM);Hypertrophic cardiomyopathy (HCM);NA;Pancreatic secretion;Thyroid hormone signaling pathway	Cardiac conduction;Hemostasis;Ion channel transport;Ion homeostasis;Ion transport by P-type ATPases;Muscle contraction;Platelet calcium homeostasis;Platelet homeostasis;Pre-NOTCH Expression and Processing;Pre-NOTCH Processing in Golgi;Reduction of cytosolic Ca++ levels;Signal Transduction;Signaling by NOTCH;Transport of small molecules	85;56;56;56;56;56;56;52;52;4;3;2;1;1	85;56;56;56;56;56;56;52;52;4;3;2;1;1	55;30;30;30;30;30;30;30;30;2;2;2;1;1
21582	Q8R5A0;ENSP00000409822;B0R0U3	Q8R5A0	N-lysine methyltransferase SMYD2	Smyd2		Unspecific	8.02473	6.13093	-6.29108	8.03024	0.00042872	+	Lysine degradation;Metabolic pathways	Chromatin modifying enzymes;Chromatin organization;Gene expression (Transcription);Generic Transcription Pathway;PKMTs methylate histone lysines;Regulation of TP53 Activity;Regulation of TP53 Activity through Methylation;RNA Polymerase II Transcription;Transcriptional Regulation by TP53	13;2;2	6;0;0	6;0;0
21598	Q8VBT1;ENSP00000356624_p.Q124X;ENSP00000356624_p.V60M;ENSP00000356624_p.K34N;ENSP00000356624_p.A36P;ENSP00000356624;H7BY59	Q8VBT1	Beta-taxilin	Txlnb	;ENSP00000356624_p.Q124X;ENSP00000356624_p.V60M;ENSP00000356624_p.K34N;ENSP00000356624_p.A36P;ENSP00000356624_p.K34N;ENSP00000356624_p.Q124X;ENSP00000356624_p.V60M;ENSP00000356624_p.A36P;	Unspecific	7.96059	5.84208	-7.03754	7.96388	0.000988152	+			17;1;1;1;1;1;1	16;1;1;1;1;1;1	9;0;0;0;0;0;0
21743	Q8VHE0;ENSP00000403144;A6PVC9	Q8VHE0	Translocation protein SEC63 homolog	Sec63		Unspecific	8.49547	7.44574	-3.48713	8.53257	0.00122258	+	Protein export;Protein processing in endoplasmic reticulum		46;10;10	3;0;0	3;0;0
22069	Q923B6;ENSP00000305545_p.L57I;ENSP00000305545_p.G75D;ENSP00000305545_p.A122T;ENSP00000305545;Q687X5-2	Q923B6	Metalloreductase STEAP4	Steap4	;ENSP00000305545_p.L57I;ENSP00000305545_p.G75D;ENSP00000305545_p.A122T;ENSP00000305545_p.G75D;ENSP00000305545_p.L57I;ENSP00000305545_p.A122T;	Unspecific	8.83239	7.40435	-4.74385	8.8483	1.44519e-06	+			16;1;1;1;1;1	16;1;1;1;1;1	14;0;0;0;0;0
22150	Q99JI1;ENSP00000410910_p.D20E;ENSP00000419877_p.D25E;ENSP00000410910;ENSP00000419877;C9JYJ2;Q8IVN3;ENSP00000422253_p.D20E	Q99JI1	Musculoskeletal embryonic nuclear protein 1	Mustn1	;ENSP00000410910_p.D20E;ENSP00000419877_p.D25E;ENSP00000410910_p.D20E;ENSP00000419877_p.D25E;;;ENSP00000422253_p.D20E	Alt	8.84944	6.75471	-6.95853	8.85292	3.32548e-12	+			9;3;3;2;2;2;2;1	9;3;3;2;2;2;2;1	6;0;0;0;0;0;0;0
22215	Q99KW3-4;Q99KW3;Q99KW3-2;A0A2U3TZ82;G5E8W1;A0A2R8VI29;J9JI90;F6WMF4;ENSP00000407542;Q99KW3-5	Q99KW3-4;Q99KW3;Q99KW3-2;A0A2U3TZ82;G5E8W1	TRIO and F-actin-binding protein	Triobp		Unspecific	8.26443	6.66377	-5.31729	8.27519	0.000897097	+			45;45;44;42;24;11;8;4;4;2	19;19;19;16;7;1;0;0;0;2	3;3;3;0;0;0;0;0;0;2
22222	Q99L27;A0A2I3BQX8;H0YNS9;ENSP00000454138;A0A2I3BRT9;ENSP00000452766;H0YKE1	Q99L27	GMP reductase 2	Gmpr2		Unspecific	8.4994	7.22509	-4.23318	8.5219	0.000103044	+	Metabolic pathways;Purine metabolism	Metabolism;Metabolism of nucleotides;Nucleotide salvage;Purine salvage	22;9;7;7;6;1;1	8;3;0;0;3;0;0	8;3;0;0;3;0;0
22236	Q99LC5;H0YL83;ENSP00000453098;J3KN60;ENSP00000267950;H0YM12;ENSP00000453422	Q99LC5	Electron transfer flavoprotein subunit alpha, mitochondrial	Etfa		Unspecific	9.53869	8.43356	-3.67115	9.57151	5.41448e-09	+		Metabolism;Respiratory electron transport;Respiratory electron transport, ATP synthesis by chemiosmotic coupling, and heat production by uncoupling proteins.;The citric acid (TCA) cycle and respiratory electron transport	24;6;6;3;3;1;1	9;0;0;0;0;0;0	9;0;0;0;0;0;0
22480	Q9CQV8;A2A5N1;Q4VY19;ENSP00000394729;ENSP00000487924;A0A0J9YWE8;Q4VY20;ENSP00000394558	Q9CQV8;A2A5N1;Q4VY19;ENSP00000394729;ENSP00000487924;A0A0J9YWE8	14-3-3 protein beta/alpha;14-3-3 protein beta/alpha, N-terminally processed	Ywhab;YWHAB		Unspecific	9.19489	8.22098	-3.23524	9.23872	0.000393869	+	Cell cycle;Hepatitis B;Hepatitis C;Hippo signaling pathway;Oocyte meiosis;PI3K-Akt signaling pathway;Viral carcinogenesis	Activation of BAD and translocation to mitochondria;Activation of BH3-only proteins;Adaptive Immune System;Apoptosis;ARMS-mediated activation;Butyrate Response Factor 1 (BRF1) binds and destabilizes mRNA;Cell Cycle;Cell Cycle Checkpoints;Chk1/Chk2(Cds1) mediated inactivation of Cyclin B:Cdk1 complex;Cytokine Signaling in Immune system;Disease;Diseases of signal transduction;FLT3 Signaling;FOXO-me…	25;18;13;13;13;13;12;12	2;2;0;0;0;0;0;0	0;0;0;0;0;0;0;0
22715	Q9D0D5;ENSP00000417342;C9J329	Q9D0D5	General transcription factor IIE subunit 1	Gtf2e1		Unspecific	7.46682	5.64705	-6.04515	7.47334	0.00147068	+	Basal transcription factors;Viral carcinogenesis	Disease;Gene expression (Transcription);HIV Infection;HIV Life Cycle;HIV Transcription Initiation;Infectious disease;Late Phase of HIV Life Cycle;RNA Polymerase II HIV Promoter Escape;RNA Polymerase II Pre-transcription Events;RNA Polymerase II Promoter Escape;RNA polymerase II transcribes snRNA genes;RNA Polymerase II Transcription;RNA Polymerase II Transcription Initiation;RNA Polymerase II Tra…	19;2;2	3;0;0	3;0;0
22765	Q9D1E6;K7EQH0;ENSP00000485894;ENSP00000467825;K7ER04;ENSP00000468055	Q9D1E6	Tubulin-folding cofactor B	Tbcb		Unspecific	8.78137	7.30032	-4.91992	8.79548	6.06408e-07	+		Metabolism of proteins;Post-chaperonin tubulin folding pathway;Protein folding	23;2;2;2;2;2	12;0;0;0;0;0	12;0;0;0;0;0
23024	Q9DBB8;ENSP00000428935_p.V108A;ENSP00000428935_p.S66N;ENSP00000428935;E5RFE0;ENSP00000428672_p.S66N;ENSP00000428672;E5RGT8;ENSP00000221403_p.V247A;ENSP00000221403_p.S66N;ENSP00000221403;Q9UQ10;H0YBU7;ENSP00000430360_p.S54N;ENSP00000430360_p.C132R;ENSP00000430360;ENSP00000430360_p.A108CfsX30;ENSP00000428672_p.A173GfsX31;ENSP00000221403_p.A173GfsX31	Q9DBB8	Trans-1,2-dihydrobenzene-1,2-diol dehydrogenase	Dhdh	;ENSP00000428935_p.V108A;ENSP00000428935_p.S66N;ENSP00000428935_p.S66N;ENSP00000428935_p.V108A;;ENSP00000428672_p.S66N;ENSP00000428672_p.A173GfsX31;ENSP00000428672_p.S66N;;ENSP00000221403_p.V247A;ENSP00000221403_p.S66N;ENSP00000221403_p.A173GfsX31;ENSP00000221403_p.S66N;ENSP00000221403_p.V247A;;;ENSP00000430360_p.S54N;ENSP00000430360_p.C132R;ENSP00000430360_p.S54N;ENSP00000430360_p.A108CfsX30;ENS…	Ref	8.75209	7.42364	-4.41303	8.77202	0.000254884	+	Metabolic pathways;Metabolism of xenobiotics by cytochrome P450;Pentose and glucuronate interconversions		17;3;3;3;3;3;3;3;3;3;3;3;1;1;1;1;1;1;1	17;3;3;3;3;3;3;3;3;3;3;3;1;1;1;1;1;1;1	9;3;3;3;3;3;3;3;3;3;3;3;1;1;1;1;1;1;1
23394	Q9JKS4-4;Q9JKS4-2;ENSP00000485538;A0A096LPD7	Q9JKS4-4;Q9JKS4-2	LIM domain-binding protein 3	Ldb3		Unspecific	9.98342	5.06832	-16.3276	9.98343	6.31412e-112	+			36;34;6;6	36;34;6;6	0;0;0;0
23463	Q9QUG9;Q9QUG9-2;D3Z2F9;D3YXD6;D6RDD3;Q9QUG9-3;D3YZX2;D3YZP2;D3Z3N3;ENSP00000399028;E7EMB4;ENSP00000396029;E7EWQ7;ENSP00000377951;ENSP00000366709;ENSP00000366707;ENSP00000366706;A6NJ28;Q7LDG7-3;ENSP00000401314;C9JZ82;ENSP00000366705;A6NHE2;D3YZP4;D3YZP1;ENSP00000401510;ENSP00000377949;A8MVK8;ENSP00000377950;A8MTF9	Q9QUG9;Q9QUG9-2;D3Z2F9;D3YXD6	RAS guanyl-releasing protein 2	Rasgrp2		Unspecific	8.58152	6.60714	-6.55873	8.5861	2.01946e-08	+	Chemokine signaling pathway;MAPK signaling pathway;Pathways in cancer;Platelet activation;Rap1 signaling pathway;Ras signaling pathway	Adaptive Immune System;Effects of PIP2 hydrolysis;Fc epsilon receptor (FCERI) signaling;FCERI mediated NF-kB activation;G alpha (q) signalling events;GPCR downstream signalling;Hemostasis;Immune System;Innate Immune System;Integrin alphaIIb beta3 signaling;Integrin signaling;Platelet activation, signaling and aggregation;Platelet Aggregation (Plug Formation);Rap1 signalling;Signal Transduction;Si…	22;16;12;11;9;9;7;7;5;5;5;5;5;5;5;5;5;5;5;3;3;3;3;2;2;1;1;1;1;1	22;16;12;11;9;9;7;7;5;5;5;5;5;5;5;5;5;5;5;3;3;3;3;2;2;1;1;1;1;1	10;8;6;6;4;4;4;4;2;0;0;0;0;0;0;0;0;0;0;0;0;0;0;1;1;0;0;0;0;0
23499	Q9QXN3;Q9QXN3-2;ENSP00000454558_p.S44N;ENSP00000454558;H3BMU9;D3Z3P3	Q9QXN3;Q9QXN3-2	Activating signal cointegrator 1	Trip4	;;ENSP00000454558_p.S44N;ENSP00000454558_p.S44N;;	Unspecific	8.2843	6.10819	-7.22886	8.28718	1.37742e-07	+			23;21;3;3;3;2	10;10;0;0;0;2	10;10;0;0;0;2
23501	Q9QXS1-2;Q9QXS1;Q9QXS1-5;Q9QXS1-16;Q9QXS1-4;Q9QXS1-14;Q9QXS1-15;E9Q3W4;A0A0R4J218;A0A0R4J223;E9PW24;ENSP00000436702;E9PIA2;ENSP00000434490;E9PQ28;ENSP00000436702_p.R88C;REV__ENSP00000489263_p.S18G;REV__ENSP00000489263;REV__A0A0U1RR03;REV__Q8IWV8-3;REV__Q6WKZ8-3;REV__Q6WKZ8-2;REV__Q6WKZ8	Q9QXS1-2;Q9QXS1;Q9QXS1-5;Q9QXS1-16;Q9QXS1-4;Q9QXS1-14;Q9QXS1-15;E9Q3W4	Plectin	Plec	;;;;;;;;;;;ENSP00000436702_p.R88C;;;;ENSP00000436702_p.R88C;;;;;;;	Ref	10.3305	9.54047	-2.62426	10.3957	5.60309e-05	+		Apoptosis;Apoptotic cleavage of cellular proteins;Apoptotic execution phase;Assembly of collagen fibrils and other multimeric structures;Caspase-mediated cleavage of cytoskeletal proteins;Cell junction organization;Cell-Cell communication;Collagen formation;Extracellular matrix organization;Programmed Cell Death;Type I hemidesmosome assembly	493;493;481;481;481;481;479;476;83;52;47;5;5;4;4;3;2;2;2;1;1;1;1	226;226;220;220;220;220;220;220;37;21;21;0;0;0;0;0;0;0;0;0;0;0;0	6;6;0;0;0;0;0;0;6;0;0;0;0;0;0;0;0;0;0;0;0;0;0
23622	Q9R111;A0A494B982;D3YU09;ENSP00000436619;ENSP00000351170;Q9Y2T3;ENSP00000238018;Q9Y2T3-3;ENSP00000437972;Q9Y2T3-2;Q5SZC6;ENSP00000366185;ENSP00000434682;H0YDZ7;Q5SZC3;ENSP00000400857;Q5SZC5;ENSP00000403897	Q9R111;A0A494B982;D3YU09	Guanine deaminase	Gda		Unspecific	9.75976	8.99077	-2.55452	9.82803	0.000368432	+	Metabolic pathways;Purine metabolism	Metabolism;Metabolism of nucleotides;Nucleobase catabolism;Purine catabolism	34;29;28;12;12;12;11;11;8;8;7;7;5;5;4;4;3;3	34;29;28;12;12;12;11;11;8;8;7;7;5;5;4;4;3;3	34;29;28;12;12;12;11;11;8;8;7;7;5;5;4;4;3;3
23714	Q9WUZ7;D3Z3Z9;E9Q2Q9;A0A3B2WCC8;F6X737;A0A3B2WB97;ENSP00000332513_p.V188A;ENSP00000332513_p.D50N;ENSP00000332513_p.D23E;ENSP00000332513;ENSP00000332513_p.231_232insE_E;P55822;ENSP00000405675;H7C2G0;ENSP00000405675_p.128_129insE_E;F7CKA6;F6QLU8;ENSP00000404980;C9JJT2;ENSP00000404980_p.89_90insE_E;ENSP00000401572_p.V77A;ENSP00000401572;C9JX40;ENSP00000370011_p.V77A;ENSP00000370011;ENSP00000370008_p…	Q9WUZ7;D3Z3Z9;E9Q2Q9;A0A3B2WCC8;F6X737;A0A3B2WB97	SH3 domain-binding glutamic acid-rich protein	Sh3bgr	;;;;;;ENSP00000332513_p.V188A;ENSP00000332513_p.D50N;ENSP00000332513_p.D23E;ENSP00000332513_p.D23E;ENSP00000332513_p.D50N;ENSP00000332513_p.V188A;ENSP00000332513_p.231_232insE_E;ENSP00000332513_p.231_232insE_E;;ENSP00000405675_p.128_129insE_E;;ENSP00000405675_p.128_129insE_E;;;ENSP00000404980_p.89_90insE_E;;ENSP00000404980_p.89_90insE_E;ENSP00000401572_p.V77A;ENSP00000401572_p.V77A;;ENSP000003700…	Unspecific	9.1585	7.1255	-6.75348	9.16251	1.20304e-12	+			17;14;13;10;10;10;7;7;7;7;7;7;6;6;6;5;3;2;2;2;2;2;2;2;2;2;2;2;2;2;2;2;2	17;14;13;10;10;10;7;7;7;7;7;7;6;6;6;5;3;2;2;2;2;2;2;2;2;2;2;2;2;2;2;2;2	11;8;7;4;4;4;1;1;1;1;1;1;0;0;0;5;3;0;0;0;0;0;0;0;0;0;0;0;0;0;0;0;0
23803	Q9Z183;E9QAM4;ENSP00000364609;Q9Z184;Q9ULW8	Q9Z183	Protein-arginine deiminase type-4	Padi4		Unspecific	8.85775	5.90031	-9.82441	8.85823	2.0682e-22	+		Chromatin modifying enzymes;Chromatin organization	22;1;1;1;1	22;1;1;1;1	21;0;0;0;0
23812	Q9Z1E4;A0A1B0GT92;ENSP00000470072;M0QYU1;A0A1B0GR90	Q9Z1E4;A0A1B0GT92	Glycogen [starch] synthase, muscle	Gys1		Unspecific	8.69267	6.78871	-6.3248	8.69805	2.44639e-07	+	AMPK signaling pathway;Glucagon signaling pathway;Insulin resistance;Insulin signaling pathway;Metabolic pathways;PI3K-Akt signaling pathway;Starch and sucrose metabolism	Disease;Diseases of carbohydrate metabolism;Diseases of metabolism;Glycogen metabolism;Glycogen storage disease type 0 (muscle GYS1);Glycogen storage disease type XV (GYG1);Glycogen storage diseases;Glycogen synthesis;Metabolism;Metabolism of carbohydrates;Myoclonic epilepsy of Lafora	49;47;2;2;2	10;10;0;0;0	10;10;0;0;0
24563	S4R1W1;S4R1N5	S4R1W1	Glyceraldehyde-3-phosphate dehydrogenase	Gm3839		Unspecific	8.63175	7.19042	-4.788	8.64719	3.09985e-05	+			35;4	1;0	1;0
24572	S4R2S8;S4R1S2;S4R2J6;S4R165;S4R2C1;S4R187;S4R1X7;ENSP00000483244;A0A087X0B4;S4R208;S4R229;W4VSQ0;Q3UVY0;ENSP00000426011;D6RHY3;S4R1U4;ENSP00000362921;B1AQT1;ENSP00000482307;A0A087WZ26;ENSP00000426582;D6RFK6;ENSP00000480249;A0A087WWI5;ENSP00000480745;A0A087WX55;ENSP00000427121;H0YAH5;ENSP00000477814;A0A087WTE8;ENSP00000479337;A0A087WVC2;ENSP00000422506;D6RBY7;ENSP00000423968;H0Y9E9	S4R2S8;S4R1S2;S4R2J6;S4R165		Ank3		Unspecific	8.48201	7.2114	-4.22088	8.5047	0.000107682	+	Proteoglycans in cancer	Asparagine N-linked glycosylation;Axon guidance;COPI-mediated anterograde transport;Developmental Biology;ER to Golgi Anterograde Transport;Interaction between L1 and Ankyrins;L1CAM interactions;Membrane Trafficking;Metabolism of proteins;Post-translational protein modification;Transport to the Golgi and subsequent modification;Vesicle-mediated transport	62;59;33;33;30;30;28;12;12;9;7;7;7;6;6;6;4;4;4;4;3;3;2;2;2;2;2;2;2;2;2;2;1;1;1;1	49;46;32;32;29;29;27;6;6;9;4;4;4;3;3;5;4;4;4;4;3;3;2;2;2;2;2;2;2;2;2;2;1;1;1;1	0;0;0;0;0;0;0;0;0;0;0;0;0;0;0;0;0;0;0;0;0;0;0;0;0;0;0;0;0;0;0;0;0;0;0;0

## Sheet: Sheet 2
Over-representation analysis ICi-treated versus naïve patients
Selection column	Category column	Category value	Total size	Selection size	Category size	Intersection size	Enrichment factor	P value	Benj. Hoch. FDR
Downregulated ICi-treated vs. naive	Reactome name	FMO oxidises nucleophiles	14638	353	2	2	41.467	0.00057994	0.082778
Downregulated ICi-treated vs. naive	Reactome name	Fatty acids	14638	353	4	2	20.734	0.0033147	0.26199
Downregulated ICi-treated vs. naive	treated_x/y_naive B significant	+	14638	353	436	198	18.832	5.9879e-223	5.9879e-223
Downregulated ICi-treated vs. naive	Reactome name	PTK6 promotes HIF1A stabilization	14638	353	5	2	16.587	0.0053921	0.3007
Downregulated ICi-treated vs. naive	Reactome name	Activation of Ca-permeable Kainate Receptor	14638	353	7	2	11.848	0.010787	0.41141
Downregulated ICi-treated vs. naive	Reactome name	Ionotropic activity of kainate receptors	14638	353	7	2	11.848	0.010787	0.41141
Downregulated ICi-treated vs. naive	Reactome name	Purine salvage	14638	353	15	4	11.058	0.00034812	0.061907
Downregulated ICi-treated vs. naive	Reactome name	PD-1 signaling	14638	353	19	5	10.912	6.5842e-05	0.017242
Downregulated ICi-treated vs. naive	KEGG name	Valine, leucine and isoleucine biosynthesis	14638	353	4	1	10.367	0.089668	0.29073
Downregulated ICi-treated vs. naive	Reactome name	Negative regulation of NMDA receptor-mediated neuronal transmission	14638	353	17	4	9.757	0.00057835	0.082778
Downregulated ICi-treated vs. naive	Reactome name	Unblocking of NMDA receptors, glutamate binding and activation	14638	353	13	3	9.5694	0.0031223	0.25627
Downregulated ICi-treated vs. naive	Reactome name	Translocation of ZAP-70 to Immunological synapse	14638	353	14	3	8.8859	0.0038788	0.28542
Downregulated ICi-treated vs. naive	Reactome name	FCERI mediated Ca+2 mobilization	14638	353	30	6	8.2935	6.2938e-05	0.017242
Downregulated ICi-treated vs. naive	Reactome name	Generation of second messenger molecules	14638	353	35	7	8.2935	1.5383e-05	0.0054712
Downregulated ICi-treated vs. naive	Reactome name	Nucleotide salvage	14638	353	26	5	7.9745	0.00031465	0.061043
Downregulated ICi-treated vs. naive	Reactome name	Interleukin-37 signaling	14638	353	22	4	7.5395	0.0015753	0.18061
Downregulated ICi-treated vs. naive	KEGG name	Graft-versus-host disease	14638	353	28	5	7.4049	0.00044799	0.15052
Downregulated ICi-treated vs. naive	Reactome name	Ras activation upon Ca2+ influx through NMDA receptor	14638	353	17	3	7.3178	0.0067381	0.30668
Downregulated ICi-treated vs. naive	Reactome name	Phosphorylation of CD3 and TCR zeta chains	14638	353	17	3	7.3178	0.0067381	0.30668
Downregulated ICi-treated vs. naive	Reactome name	Long-term potentiation	14638	353	17	3	7.3178	0.0067381	0.30668
Downregulated ICi-treated vs. naive	Reactome name	Glycogen breakdown (glycogenolysis)	14638	353	17	3	7.3178	0.0067381	0.30668
Downregulated ICi-treated vs. naive	Reactome name	Interferon alpha/beta signaling	14638	353	60	10	6.9112	1.3478e-06	0.00057524
Downregulated ICi-treated vs. naive	KEGG name	Neomycin, kanamycin and gentamicin biosynthesis	14638	353	6	1	6.9112	0.12811	0.29325
Downregulated ICi-treated vs. naive	KEGG name	Type I diabetes mellitus	14638	353	33	5	6.2829	0.00095898	0.16111
Downregulated ICi-treated vs. naive	KEGG name	2-Oxocarboxylic acid metabolism	14638	353	20	3	6.2201	0.010504	0.29073
Downregulated ICi-treated vs. naive	Reactome name	Interferon gamma signaling	14638	353	101	15	6.1585	1.5997e-08	3.4137e-05
Downregulated ICi-treated vs. naive	Reactome name	Antigen activates B Cell Receptor (BCR) leading to generation of second messengers	14638	353	34	5	6.0982	0.0010975	0.13777
Downregulated ICi-treated vs. naive	Reactome name	Other interleukin signaling	14638	353	22	3	5.6546	0.013518	0.48896
Downregulated ICi-treated vs. naive	Reactome name	Glycogen metabolism	14638	353	30	4	5.529	0.0048639	0.3007
Downregulated ICi-treated vs. naive	Reactome name	DAP12 signaling	14638	353	30	4	5.529	0.0048639	0.3007
Downregulated ICi-treated vs. naive	Reactome name	DAP12 interactions	14638	353	31	4	5.3506	0.0054511	0.3007
Downregulated ICi-treated vs. naive	Reactome name	Interleukin-2 family signaling	14638	353	33	4	5.0264	0.0067543	0.30668
Downregulated ICi-treated vs. naive	Reactome name	Assembly and cell surface presentation of NMDA receptors	14638	353	37	4	4.483	0.0098962	0.41141
Downregulated ICi-treated vs. naive	Reactome name	GPVI-mediated activation cascade	14638	353	38	4	4.365	0.010796	0.41141
Downregulated ICi-treated vs. naive	KEGG name	Insulin secretion	14638	353	59	6	4.217	0.0023767	0.26619
Downregulated ICi-treated vs. naive	KEGG name	Glycosphingolipid biosynthesis - ganglio series	14638	353	10	1	4.1467	0.1937	0.35371
Downregulated ICi-treated vs. naive	Reactome name	Interferon Signaling	14638	353	205	20	4.0456	9.6168e-08	6.8407e-05
Downregulated ICi-treated vs. naive	KEGG name	Inflammatory bowel disease (IBD)	14638	353	43	4	3.8574	0.015993	0.29073
Downregulated ICi-treated vs. naive	KEGG name	Starch and sucrose metabolism	14638	353	34	3	3.6589	0.039268	0.29073
Downregulated ICi-treated vs. naive	Reactome name	Costimulation by the CD28 family	14638	353	69	6	3.6059	0.0049694	0.3007
Downregulated ICi-treated vs. naive	Reactome name	Post NMDA receptor activation events	14638	353	82	7	3.5399	0.0028127	0.25627
Downregulated ICi-treated vs. naive	KEGG name	Glycosaminoglycan biosynthesis - keratan sulfate	14638	353	12	1	3.4556	0.22138	0.38742
Downregulated ICi-treated vs. naive	Reactome name	Phase I - Functionalization of compounds	14638	353	61	5	3.399	0.012228	0.45781
Downregulated ICi-treated vs. naive	Reactome name	Activation of NMDA receptors and postsynaptic events	14638	353	89	7	3.2615	0.0043075	0.3007
Downregulated ICi-treated vs. naive	KEGG name	Aldosterone synthesis and secretion	14638	353	77	6	3.2312	0.0081042	0.29073
Downregulated ICi-treated vs. naive	KEGG name	Protein digestion and absorption	14638	353	66	5	3.1415	0.016279	0.29073
Downregulated ICi-treated vs. naive	KEGG name	Glucagon signaling pathway	14638	353	95	7	3.0555	0.005979	0.29073
Downregulated ICi-treated vs. naive	KEGG name	Glioma	14638	353	68	5	3.0491	0.018092	0.29073
Downregulated ICi-treated vs. naive	Reactome name	TCR signaling	14638	353	125	9	2.9857	0.0023872	0.24258
Downregulated ICi-treated vs. naive	KEGG name	Mitophagy - animal	14638	353	71	5	2.9202	0.021016	0.29073
Downregulated ICi-treated vs. naive	Reactome name	Fcgamma receptor (FCGR) dependent phagocytosis	14638	353	102	7	2.8458	0.0084419	0.37531
Downregulated ICi-treated vs. naive	KEGG name	Th17 cell differentiation	14638	353	89	6	2.7956	0.01487	0.29073
Downregulated ICi-treated vs. naive	Reactome name	Signaling by the B Cell Receptor (BCR)	14638	353	120	8	2.7645	0.0060763	0.30668
Downregulated ICi-treated vs. naive	Reactome name	Rho GTPase cycle	14638	353	151	10	2.7462	0.0025476	0.24712
Downregulated ICi-treated vs. naive	KEGG name	Th1 and Th2 cell differentiation	14638	353	76	5	2.7281	0.026425	0.29073
Downregulated ICi-treated vs. naive	Reactome name	Fc epsilon receptor (FCERI) signaling	14638	353	140	9	2.6658	0.0047699	0.3007
Downregulated ICi-treated vs. naive	Reactome name	Neurotransmitter receptors and postsynaptic signal transmission	14638	353	142	9	2.6282	0.0051848	0.3007
Downregulated ICi-treated vs. naive	KEGG name	Carbohydrate digestion and absorption	14638	353	33	2	2.5132	0.14417	0.30466
Downregulated ICi-treated vs. naive	KEGG name	C-type lectin receptor signaling pathway	14638	353	99	6	2.5132	0.022521	0.29073
Downregulated ICi-treated vs. naive	KEGG name	Amyotrophic lateral sclerosis (ALS)	14638	353	50	3	2.488	0.087227	0.29073
Downregulated ICi-treated vs. naive	KEGG name	Thyroid hormone signaling pathway	14638	353	119	7	2.4393	0.016998	0.29073
Downregulated ICi-treated vs. naive	KEGG name	Leukocyte transendothelial migration	14638	353	122	7	2.3793	0.018907	0.29073
Downregulated ICi-treated vs. naive	KEGG name	Central carbon metabolism in cancer	14638	353	70	4	2.3696	0.061779	0.29073
Downregulated ICi-treated vs. naive	Reactome name	Cytokine Signaling in Immune system	14638	353	753	43	2.368	8.112e-08	6.8407e-05
Downregulated ICi-treated vs. naive	KEGG name	PD-L1 expression and PD-1 checkpoint pathway in cancer	14638	353	88	5	2.3561	0.041913	0.29073
Downregulated ICi-treated vs. naive	KEGG name	Neurotrophin signaling pathway	14638	353	124	7	2.3409	0.020247	0.29073
Downregulated ICi-treated vs. naive	KEGG name	Cytosolic DNA-sensing pathway	14638	353	54	3	2.3037	0.10017	0.29073
Downregulated ICi-treated vs. naive	KEGG name	Chemokine signaling pathway	14638	353	163	9	2.2896	0.011204	0.29073
Downregulated ICi-treated vs. naive	Reactome name	Transmission across Chemical Synapses	14638	353	184	10	2.2537	0.0088082	0.38361
Downregulated ICi-treated vs. naive	Reactome name	Neuronal System	14638	353	243	13	2.2184	0.0038313	0.28542
Downregulated ICi-treated vs. naive	KEGG name	Platelet activation	14638	353	132	7	2.199	0.026133	0.29073
Downregulated ICi-treated vs. naive	KEGG name	Arrhythmogenic right ventricular cardiomyopathy (ARVC)	14638	353	76	4	2.1825	0.074738	0.29073
Downregulated ICi-treated vs. naive	KEGG name	Pantothenate and CoA biosynthesis	14638	353	19	1	2.1825	0.29556	0.41902
Downregulated ICi-treated vs. naive	KEGG name	Viral carcinogenesis	14638	353	211	11	2.1618	0.0083185	0.29073
Downregulated ICi-treated vs. naive	KEGG name	Choline metabolism in cancer	14638	353	96	5	2.1598	0.053878	0.29073
Downregulated ICi-treated vs. naive	KEGG name	Kaposi sarcoma-associated herpesvirus infection	14638	353	173	9	2.1573	0.015253	0.29073
Downregulated ICi-treated vs. naive	KEGG name	Biosynthesis of amino acids	14638	353	77	4	2.1542	0.076944	0.29073
Downregulated ICi-treated vs. naive	KEGG name	RIG-I-like receptor signaling pathway	14638	353	58	3	2.1449	0.11307	0.29073
Downregulated ICi-treated vs. naive	KEGG name	GnRH secretion	14638	353	39	2	2.1265	0.17485	0.3338
Downregulated ICi-treated vs. naive	KEGG name	Long-term potentiation	14638	353	59	3	2.1085	0.11627	0.29073
Downregulated ICi-treated vs. naive	KEGG name	Gastric acid secretion	14638	353	60	3	2.0734	0.11945	0.29073
Downregulated ICi-treated vs. naive	KEGG name	Oxytocin signaling pathway	14638	353	140	7	2.0734	0.032828	0.29073
Downregulated ICi-treated vs. naive	KEGG name	Rap1 signaling pathway	14638	353	200	10	2.0734	0.014087	0.29073
Downregulated ICi-treated vs. naive	KEGG name	Malaria	14638	353	40	2	2.0734	0.17962	0.33906
Downregulated ICi-treated vs. naive	KEGG name	AGE-RAGE signaling pathway in diabetic complications	14638	353	100	5	2.0734	0.060234	0.29073
Downregulated ICi-treated vs. naive	KEGG name	Legionellosis	14638	353	62	3	2.0065	0.12575	0.29325
Downregulated ICi-treated vs. naive	KEGG name	Pentose and glucuronate interconversions	14638	353	21	1	1.9746	0.31113	0.43924
Downregulated ICi-treated vs. naive	KEGG name	JAK-STAT signaling pathway	14638	353	84	4	1.9746	0.092569	0.29073
Downregulated ICi-treated vs. naive	KEGG name	Measles	14638	353	127	6	1.9591	0.052795	0.29073
Downregulated ICi-treated vs. naive	KEGG name	VEGF signaling pathway	14638	353	64	3	1.9438	0.13196	0.2949
Downregulated ICi-treated vs. naive	Reactome name	Adaptive Immune System	14638	353	722	33	1.8953	0.00017347	0.037019
Downregulated ICi-treated vs. naive	KEGG name	Steroid hormone biosynthesis	14638	353	22	1	1.8849	0.31809	0.44348
Downregulated ICi-treated vs. naive	KEGG name	Yersinia infection	14638	353	154	7	1.8849	0.046256	0.29073
Downregulated ICi-treated vs. naive	Reactome name	Signaling by Interleukins	14638	353	400	18	1.866	0.0045634	0.3007
Downregulated ICi-treated vs. naive	Class II	+	14638	353	4252	191	1.8627	1.3008e-23	1.3008e-23
Downregulated ICi-treated vs. naive	C: Taxonomy	Mus musculus	14638	353	4252	191	1.8627	1.3008e-23	1.3008e-23
Downregulated ICi-treated vs. naive	KEGG name	HIF-1 signaling pathway	14638	353	112	5	1.8512	0.080242	0.29073
Downregulated ICi-treated vs. naive	KEGG name	Toll-like receptor signaling pathway	14638	353	91	4	1.8227	0.10818	0.29073
Downregulated ICi-treated vs. naive	KEGG name	Toxoplasmosis	14638	353	115	5	1.8029	0.085358	0.29073
Downregulated ICi-treated vs. naive	KEGG name	Proximal tubule bicarbonate reclamation	14638	353	23	1	1.8029	0.32454	0.44422
Downregulated ICi-treated vs. naive	KEGG name	Circadian entrainment	14638	353	69	3	1.8029	0.14695	0.30501
Downregulated ICi-treated vs. naive	KEGG name	Insulin signaling pathway	14638	353	141	6	1.7646	0.0713	0.29073
Downregulated ICi-treated vs. naive	KEGG name	cAMP signaling pathway	14638	353	143	6	1.7399	0.074031	0.29073
Downregulated ICi-treated vs. naive	KEGG name	NOD-like receptor signaling pathway	14638	353	167	7	1.7382	0.060216	0.29073
Downregulated ICi-treated vs. naive	Reactome name	Immune System	14638	353	1891	79	1.7324	2.4971e-07	0.00013322
Downregulated ICi-treated vs. naive	KEGG name	Salmonella infection	14638	353	96	4	1.7278	0.11909	0.29073
Downregulated ICi-treated vs. naive	KEGG name	Arginine biosynthesis	14638	353	24	1	1.7278	0.3305	0.44422
Downregulated ICi-treated vs. naive	KEGG name	Hypertrophic cardiomyopathy (HCM)	14638	353	96	4	1.7278	0.11909	0.29073
Downregulated ICi-treated vs. naive	Reactome name	Signaling by Rho GTPases	14638	353	480	20	1.7278	0.006302	0.30668
Downregulated ICi-treated vs. naive	Reactome name	Neutrophil degranulation	14638	353	507	21	1.7176	0.0056594	0.30193
Downregulated ICi-treated vs. naive	KEGG name	Epithelial cell signaling in Helicobacter pylori infection	14638	353	73	3	1.7041	0.15827	0.32035
Downregulated ICi-treated vs. naive	KEGG name	Amphetamine addiction	14638	353	50	2	1.6587	0.22114	0.38742
Downregulated ICi-treated vs. naive	KEGG name	Complement and coagulation cascades	14638	353	75	3	1.6587	0.16367	0.32361
Downregulated ICi-treated vs. naive	KEGG name	Pertussis	14638	353	76	3	1.6369	0.1663	0.32677
Downregulated ICi-treated vs. naive	KEGG name	Adherens junction	14638	353	102	4	1.6262	0.13168	0.2949
Downregulated ICi-treated vs. naive	KEGG name	Adrenergic signaling in cardiomyocytes	14638	353	128	5	1.6198	0.10734	0.29073
Downregulated ICi-treated vs. naive	KEGG name	Endocrine and other factor-regulated calcium reabsorption	14638	353	52	2	1.5949	0.22799	0.39085
Downregulated ICi-treated vs. naive	KEGG name	Wnt signaling pathway	14638	353	131	5	1.5827	0.11226	0.29073
Downregulated ICi-treated vs. naive	KEGG name	Inflammatory mediator regulation of TRP channels	14638	353	79	3	1.5747	0.1739	0.3338
Downregulated ICi-treated vs. naive	Reactome name	Innate Immune System	14638	353	1002	38	1.5726	0.0016081	0.18061
Downregulated ICi-treated vs. naive	KEGG name	Vasopressin-regulated water reabsorption	14638	353	53	2	1.5648	0.23123	0.3924
Downregulated ICi-treated vs. naive	KEGG name	Axon guidance	14638	353	161	6	1.5454	0.098638	0.29073
Downregulated ICi-treated vs. naive	KEGG name	Human cytomegalovirus infection	14638	353	215	8	1.543	0.072517	0.29073
Downregulated ICi-treated vs. naive	KEGG name	Human T-cell leukemia virus 1 infection	14638	353	215	8	1.543	0.072517	0.29073
Downregulated ICi-treated vs. naive	KEGG name	Prolactin signaling pathway	14638	353	54	2	1.5358	0.23435	0.39508
Downregulated ICi-treated vs. naive	KEGG name	Cytokine-cytokine receptor interaction	14638	353	108	4	1.5358	0.14352	0.30466
Downregulated ICi-treated vs. naive	KEGG name	TNF signaling pathway	14638	353	108	4	1.5358	0.14352	0.30466
Downregulated ICi-treated vs. naive	KEGG name	ErbB signaling pathway	14638	353	83	3	1.4988	0.18331	0.34409
Downregulated ICi-treated vs. naive	KEGG name	Cholinergic synapse	14638	353	84	3	1.481	0.18553	0.34632
Downregulated ICi-treated vs. naive	KEGG name	Glycine, serine and threonine metabolism	14638	353	28	1	1.481	0.34975	0.44422
Downregulated ICi-treated vs. naive	KEGG name	Gap junction	14638	353	86	3	1.4465	0.1898	0.34848
Downregulated ICi-treated vs. naive	KEGG name	GnRH signaling pathway	14638	353	86	3	1.4465	0.1898	0.34848
Downregulated ICi-treated vs. naive	KEGG name	Carbon metabolism	14638	353	116	4	1.4299	0.15786	0.32035
Downregulated ICi-treated vs. naive	KEGG name	Autophagy - animal	14638	353	146	5	1.4201	0.13516	0.2949
Downregulated ICi-treated vs. naive	KEGG name	Apoptosis	14638	353	146	5	1.4201	0.13516	0.2949
Downregulated ICi-treated vs. naive	KEGG name	Calcium signaling pathway	14638	353	501	17	1.4071	0.038868	0.29073
Downregulated ICi-treated vs. naive	KEGG name	Morphine addiction	14638	353	59	2	1.4057	0.24806	0.39759
Downregulated ICi-treated vs. naive	KEGG name	Thyroid hormone synthesis	14638	353	59	2	1.4057	0.24806	0.39759
Downregulated ICi-treated vs. naive	KEGG name	Viral myocarditis	14638	353	444	15	1.4009	0.047215	0.29073
Downregulated ICi-treated vs. naive	KEGG name	Cell adhesion molecules (CAMs)	14638	353	480	16	1.3822	0.046159	0.29073
Downregulated ICi-treated vs. naive	KEGG name	Epstein-Barr virus infection	14638	353	556	18	1.3425	0.045635	0.29073
Downregulated ICi-treated vs. naive	KEGG name	Aldosterone-regulated sodium reabsorption	14638	353	31	1	1.3377	0.3599	0.44422
Downregulated ICi-treated vs. naive	KEGG name	Cardiac muscle contraction	14638	353	62	2	1.3377	0.25483	0.39759
Downregulated ICi-treated vs. naive	KEGG name	Antifolate resistance	14638	353	31	1	1.3377	0.3599	0.44422
Downregulated ICi-treated vs. naive	KEGG name	Galactose metabolism	14638	353	31	1	1.3377	0.3599	0.44422
Downregulated ICi-treated vs. naive	KEGG name	Cellular senescence	14638	353	155	5	1.3377	0.14706	0.30501
Downregulated ICi-treated vs. naive	KEGG name	cGMP-PKG signaling pathway	14638	353	126	4	1.3164	0.173	0.3338
Downregulated ICi-treated vs. naive	KEGG name	Hepatitis C	14638	353	127	4	1.3061	0.17433	0.3338
Downregulated ICi-treated vs. naive	KEGG name	Herpes simplex virus 1 infection	14638	353	604	19	1.3044	0.049093	0.29073
Downregulated ICi-treated vs. naive	KEGG name	Hepatitis B	14638	353	159	5	1.304	0.1518	0.31291
Downregulated ICi-treated vs. naive	KEGG name	Chagas disease (American trypanosomiasis)	14638	353	96	3	1.2959	0.20771	0.37321
Downregulated ICi-treated vs. naive	KEGG name	Apelin signaling pathway	14638	353	129	4	1.2858	0.17689	0.33579
Downregulated ICi-treated vs. naive	KEGG name	Bacterial invasion of epithelial cells	14638	353	97	3	1.2825	0.20918	0.37385
Downregulated ICi-treated vs. naive	Reactome name	Signal Transduction	14638	353	1951	59	1.254	0.010714	0.41141
Downregulated ICi-treated vs. naive	KEGG name	Regulation of actin cytoskeleton	14638	353	237	7	1.2248	0.13272	0.2949
Downregulated ICi-treated vs. naive	KEGG name	Mineral absorption	14638	353	34	1	1.2196	0.36687	0.44422
Downregulated ICi-treated vs. naive	KEGG name	Acute myeloid leukemia	14638	353	68	2	1.2196	0.26521	0.39759
Downregulated ICi-treated vs. naive	KEGG name	B cell receptor signaling pathway	14638	353	442	13	1.2196	0.088133	0.29073
Downregulated ICi-treated vs. naive	KEGG name	Citrate cycle (TCA cycle)	14638	353	34	1	1.2196	0.36687	0.44422
Downregulated ICi-treated vs. naive	KEGG name	Tuberculosis	14638	353	516	15	1.2054	0.081692	0.29073
Downregulated ICi-treated vs. naive	KEGG name	Vibrio cholerae infection	14638	353	69	2	1.202	0.26654	0.39759
Downregulated ICi-treated vs. naive	KEGG name	Phagosome	14638	353	521	15	1.1939	0.083802	0.29073
Downregulated ICi-treated vs. naive	KEGG name	Cocaine addiction	14638	353	35	1	1.1848	0.36856	0.44422
Downregulated ICi-treated vs. naive	KEGG name	Pyrimidine metabolism	14638	353	70	2	1.1848	0.26777	0.39759
Downregulated ICi-treated vs. naive	KEGG name	Non-small cell lung cancer	14638	353	70	2	1.1848	0.26777	0.39759
Downregulated ICi-treated vs. naive	KEGG name	Hippo signaling pathway - multiple species	14638	353	35	1	1.1848	0.36856	0.44422
Downregulated ICi-treated vs. naive	KEGG name	NF-kappa B signaling pathway	14638	353	459	13	1.1745	0.095946	0.29073
Downregulated ICi-treated vs. naive	KEGG name	Serotonergic synapse	14638	353	71	2	1.1681	0.2689	0.39759
Downregulated ICi-treated vs. naive	KEGG name	Antigen processing and presentation	14638	353	427	12	1.1654	0.10246	0.29073
Downregulated ICi-treated vs. naive	KEGG name	Autoimmune thyroid disease	14638	353	393	11	1.1607	0.1088	0.29073
Downregulated ICi-treated vs. naive	KEGG name	Allograft rejection	14638	353	395	11	1.1548	0.10967	0.29073
Downregulated ICi-treated vs. naive	KEGG name	SNARE interactions in vesicular transport	14638	353	36	1	1.1519	0.36995	0.44422
Downregulated ICi-treated vs. naive	KEGG name	Nicotinate and nicotinamide metabolism	14638	353	36	1	1.1519	0.36995	0.44422
Downregulated ICi-treated vs. naive	KEGG name	TGF-beta signaling pathway	14638	353	72	2	1.1519	0.26992	0.39759
Downregulated ICi-treated vs. naive	KEGG name	Alanine, aspartate and glutamate metabolism	14638	353	36	1	1.1519	0.36995	0.44422
Downregulated ICi-treated vs. naive	KEGG name	Endocytosis	14638	353	648	18	1.1519	0.080995	0.29073
Downregulated ICi-treated vs. naive	KEGG name	Leishmaniasis	14638	353	434	12	1.1466	0.10533	0.29073
Downregulated ICi-treated vs. naive	KEGG name	Cushing syndrome	14638	353	110	3	1.1309	0.22304	0.3883
Downregulated ICi-treated vs. naive	KEGG name	Base excision repair	14638	353	37	1	1.1207	0.37106	0.44422
Downregulated ICi-treated vs. naive	KEGG name	Apoptosis - multiple species	14638	353	37	1	1.1207	0.37106	0.44422
Downregulated ICi-treated vs. naive	KEGG name	IL-17 signaling pathway	14638	353	74	2	1.1207	0.27165	0.39759
Downregulated ICi-treated vs. naive	KEGG name	Type II diabetes mellitus	14638	353	37	1	1.1207	0.37106	0.44422
Downregulated ICi-treated vs. naive	KEGG name	Sphingolipid metabolism	14638	353	37	1	1.1207	0.37106	0.44422
Downregulated ICi-treated vs. naive	KEGG name	Influenza A	14638	353	520	14	1.1164	0.10048	0.29073
Downregulated ICi-treated vs. naive	KEGG name	Natural killer cell mediated cytotoxicity	14638	353	451	12	1.1033	0.11112	0.29073
Downregulated ICi-treated vs. naive	KEGG name	Ubiquitin mediated proteolysis	14638	353	152	4	1.0912	0.19608	0.35612
Downregulated ICi-treated vs. naive	KEGG name	Human immunodeficiency virus 1 infection	14638	353	571	15	1.0893	0.1002	0.29073
Downregulated ICi-treated vs. naive	T: Best coverage type	Unspecific	14638	353	10250	267	1.0802	0.0029675	0.005935
Downregulated ICi-treated vs. naive	KEGG name	Melanogenesis	14638	353	77	2	1.0771	0.27351	0.39759
Downregulated ICi-treated vs. naive	KEGG name	Thyroid cancer	14638	353	39	1	1.0633	0.37249	0.44422
Downregulated ICi-treated vs. naive	KEGG name	Various types of N-glycan biosynthesis	14638	353	39	1	1.0633	0.37249	0.44422
Downregulated ICi-treated vs. naive	KEGG name	EGFR tyrosine kinase inhibitor resistance	14638	353	78	2	1.0633	0.27394	0.39759
Downregulated ICi-treated vs. naive	KEGG name	Sphingolipid signaling pathway	14638	353	118	3	1.0543	0.22694	0.39085
Downregulated ICi-treated vs. naive	KEGG name	Osteoclast differentiation	14638	353	473	12	1.052	0.11598	0.29073
Downregulated ICi-treated vs. naive	C: Taxon name	Homo sapiens	14638	353	13517	339	1.04	0.001696	0.001696
Downregulated ICi-treated vs. naive	C: Taxon name_	Homo sapiens	14638	353	13559	339	1.0368	0.0028736	0.0028736
Downregulated ICi-treated vs. naive	KEGG name	Inositol phosphate metabolism	14638	353	80	2	1.0367	0.27453	0.39759
Downregulated ICi-treated vs. naive	KEGG name	Bile secretion	14638	353	40	1	1.0367	0.37283	0.44422
Downregulated ICi-treated vs. naive	KEGG name	Transcriptional misregulation in cancer	14638	353	523	13	1.0307	0.11273	0.29073
Downregulated ICi-treated vs. naive	KEGG name	Pathogenic Escherichia coli infection	14638	353	573	14	1.0132	0.10936	0.29073
Downregulated ICi-treated vs. naive	T: Best coverage type	Alt	14638	353	700	17	1.0071	0.099864	0.099864
Downregulated ICi-treated vs. naive	KEGG name	Staphylococcus aureus infection	14638	353	421	10	0.98497	0.1283	0.29325
Downregulated ICi-treated vs. naive	KEGG name	Ras signaling pathway	14638	353	550	13	0.98014	0.11305	0.29073
Downregulated ICi-treated vs. naive	KEGG name	Shigellosis	14638	353	254	6	0.97955	0.16373	0.32361
Downregulated ICi-treated vs. naive	KEGG name	Salivary secretion	14638	353	426	10	0.97341	0.12794	0.29325
Downregulated ICi-treated vs. naive	KEGG name	Asthma	14638	353	385	9	0.96937	0.13443	0.2949
Downregulated ICi-treated vs. naive	KEGG name	Bladder cancer	14638	353	43	1	0.96436	0.37249	0.44422
Downregulated ICi-treated vs. naive	KEGG name	Longevity regulating pathway	14638	353	86	2	0.96436	0.27427	0.39759
Downregulated ICi-treated vs. naive	T: Best coverage type	Ref	14638	353	1822	42	0.95589	0.062953	0.083937
Downregulated ICi-treated vs. naive	KEGG name	Pancreatic cancer	14638	353	87	2	0.95327	0.27395	0.39759
Downregulated ICi-treated vs. naive	KEGG name	PI3K-Akt signaling pathway	14638	353	656	15	0.94819	0.10348	0.29073
Downregulated ICi-treated vs. naive	KEGG name	Intestinal immune network for IgA production	14638	353	396	9	0.94244	0.13274	0.2949
Downregulated ICi-treated vs. naive	KEGG name	Prostate cancer	14638	353	88	2	0.94244	0.27356	0.39759
Downregulated ICi-treated vs. naive	KEGG name	Cortisol synthesis and secretion	14638	353	44	1	0.94244	0.37196	0.44422
Downregulated ICi-treated vs. naive	KEGG name	Proteoglycans in cancer	14638	353	573	13	0.9408	0.11037	0.29073
Downregulated ICi-treated vs. naive	KEGG name	Purine metabolism	14638	353	489	11	0.9328	0.11919	0.29073
Downregulated ICi-treated vs. naive	KEGG name	Tight junction	14638	353	539	12	0.92321	0.11287	0.29073
Downregulated ICi-treated vs. naive	KEGG name	NA	14638	353	455	10	0.91137	0.12246	0.29073
Downregulated ICi-treated vs. naive	KEGG name	T cell receptor signaling pathway	14638	353	457	10	0.90738	0.12189	0.29073
Downregulated ICi-treated vs. naive	KEGG name	Pathways in cancer	14638	353	788	17	0.8946	0.088654	0.29073
Downregulated ICi-treated vs. naive	KEGG name	Basal transcription factors	14638	353	47	1	0.88229	0.36926	0.44422
Downregulated ICi-treated vs. naive	KEGG name	Valine, leucine and isoleucine degradation	14638	353	47	1	0.88229	0.36926	0.44422
Downregulated ICi-treated vs. naive	KEGG name	Hematopoietic cell lineage	14638	353	423	9	0.88229	0.12485	0.29325
Downregulated ICi-treated vs. naive	KEGG name	Estrogen signaling pathway	14638	353	94	2	0.88229	0.26979	0.39759
Downregulated ICi-treated vs. naive	KEGG name	Fc gamma R-mediated phagocytosis	14638	353	470	10	0.88229	0.11768	0.29073
Downregulated ICi-treated vs. naive	KEGG name	MAPK signaling pathway	14638	353	614	13	0.87797	0.10016	0.29073
Downregulated ICi-treated vs. naive	KEGG name	Focal adhesion	14638	353	238	5	0.87116	0.1696	0.3313
Downregulated ICi-treated vs. naive	KEGG name	Small cell lung cancer	14638	353	96	2	0.8639	0.26803	0.39759
Downregulated ICi-treated vs. naive	KEGG name	Fc epsilon RI signaling pathway	14638	353	432	9	0.8639	0.12125	0.29073
Downregulated ICi-treated vs. naive	KEGG name	Cysteine and methionine metabolism	14638	353	48	1	0.8639	0.36802	0.44422
Downregulated ICi-treated vs. naive	KEGG name	Systemic lupus erythematosus	14638	353	435	9	0.85795	0.11996	0.29073
Downregulated ICi-treated vs. naive	KEGG name	Human papillomavirus infection	14638	353	677	14	0.85752	0.090704	0.29073
Downregulated ICi-treated vs. naive	KEGG name	Regulation of lipolysis in adipocytes	14638	353	49	1	0.84627	0.36662	0.44422
Downregulated ICi-treated vs. naive	KEGG name	Proteasome	14638	353	49	1	0.84627	0.36662	0.44422
Downregulated ICi-treated vs. naive	KEGG name	Metabolic pathways	14638	353	1633	33	0.83798	0.039308	0.29073
Downregulated ICi-treated vs. naive	KEGG name	Phospholipase D signaling pathway	14638	353	499	10	0.83101	0.10573	0.29073
Downregulated ICi-treated vs. naive	KEGG name	Fluid shear stress and atherosclerosis	14638	353	505	10	0.82114	0.10294	0.29073
Downregulated ICi-treated vs. naive	KEGG name	Metabolism of xenobiotics by cytochrome P450	14638	353	406	8	0.81709	0.11869	0.29073
Downregulated ICi-treated vs. naive	KEGG name	Phosphatidylinositol signaling system	14638	353	102	2	0.81309	0.26148	0.39759
Downregulated ICi-treated vs. naive	KEGG name	Alcoholism	14638	353	103	2	0.80519	0.26022	0.39759
Downregulated ICi-treated vs. naive	KEGG name	Dilated cardiomyopathy (DCM)	14638	353	467	9	0.79916	0.1042	0.29073
Downregulated ICi-treated vs. naive	KEGG name	Insulin resistance	14638	353	105	2	0.78986	0.25756	0.39759
Downregulated ICi-treated vs. naive	KEGG name	Long-term depression	14638	353	53	1	0.7824	0.35964	0.44422
Downregulated ICi-treated vs. naive	KEGG name	Pancreatic secretion	14638	353	426	8	0.77873	0.10706	0.29073
Downregulated ICi-treated vs. naive	KEGG name	Lysine degradation	14638	353	427	8	0.77691	0.10645	0.29073
Downregulated ICi-treated vs. naive	KEGG name	Retrograde endocannabinoid signaling	14638	353	107	2	0.77509	0.25475	0.39759
Downregulated ICi-treated vs. naive	KEGG name	Melanoma	14638	353	54	1	0.76792	0.35758	0.44422
Downregulated ICi-treated vs. naive	KEGG name	Alzheimer disease	14638	353	162	3	0.76792	0.20179	0.36452
Downregulated ICi-treated vs. naive	KEGG name	Growth hormone synthesis, secretion and action	14638	353	108	2	0.76792	0.25329	0.39759
Downregulated ICi-treated vs. naive	KEGG name	Rheumatoid arthritis	14638	353	439	8	0.75567	0.099109	0.29073
Downregulated ICi-treated vs. naive	KEGG name	N-Glycan biosynthesis	14638	353	55	1	0.75395	0.35541	0.44422
Downregulated ICi-treated vs. naive	KEGG name	Dopaminergic synapse	14638	353	110	2	0.75395	0.25026	0.39759
Downregulated ICi-treated vs. naive	KEGG name	Thermogenesis	14638	353	222	4	0.74716	0.16322	0.32361
Downregulated ICi-treated vs. naive	KEGG name	Renin secretion	14638	353	56	1	0.74049	0.35314	0.44422
Downregulated ICi-treated vs. naive	KEGG name	Primary immunodeficiency	14638	353	397	7	0.73116	0.10176	0.29073
Downregulated ICi-treated vs. naive	KEGG name	African trypanosomiasis	14638	353	398	7	0.72933	0.10106	0.29073
Downregulated ICi-treated vs. naive	KEGG name	Amino sugar and nucleotide sugar metabolism	14638	353	57	1	0.7275	0.35077	0.44422
Downregulated ICi-treated vs. naive	KEGG name	Drug metabolism - cytochrome P450	14638	353	401	7	0.72387	0.098981	0.29073
Downregulated ICi-treated vs. naive	KEGG name	Hepatocellular carcinoma	14638	353	517	9	0.72187	0.076586	0.29073
Downregulated ICi-treated vs. naive	KEGG name	Relaxin signaling pathway	14638	353	115	2	0.72117	0.24213	0.39759
Downregulated ICi-treated vs. naive	KEGG name	Synaptic vesicle cycle	14638	353	58	1	0.71496	0.3483	0.44422
Downregulated ICi-treated vs. naive	KEGG name	Neuroactive ligand-receptor interaction	14638	353	58	1	0.71496	0.3483	0.44422
Downregulated ICi-treated vs. naive	KEGG name	Amoebiasis	14638	353	471	8	0.70433	0.079478	0.29073
Downregulated ICi-treated vs. naive	KEGG name	AMPK signaling pathway	14638	353	119	2	0.69693	0.23517	0.39508
Downregulated ICi-treated vs. naive	KEGG name	Drug metabolism - other enzymes	14638	353	61	1	0.67979	0.34042	0.44422
Downregulated ICi-treated vs. naive	KEGG name	Glycolysis / Gluconeogenesis	14638	353	429	7	0.67662	0.079942	0.29073
Downregulated ICi-treated vs. naive	KEGG name	Adipocytokine signaling pathway	14638	353	62	1	0.66883	0.33765	0.44422
Downregulated ICi-treated vs. naive	KEGG name	Maturity onset diabetes of the young	14638	353	375	6	0.66348	0.088919	0.29073
Downregulated ICi-treated vs. naive	KEGG name	Thiamine metabolism	14638	353	379	6	0.65648	0.085909	0.29073
Downregulated ICi-treated vs. naive	KEGG name	Glycerophospholipid metabolism	14638	353	443	7	0.65524	0.070978	0.29073
Downregulated ICi-treated vs. naive	KEGG name	Glutamatergic synapse	14638	353	443	7	0.65524	0.070978	0.29073
Downregulated ICi-treated vs. naive	KEGG name	Ubiquinone and other terpenoid-quinone biosynthesis	14638	353	380	6	0.65475	0.085163	0.29073
Downregulated ICi-treated vs. naive	Reactome name	Metabolism of proteins	14638	353	1901	30	0.6544	0.0020892	0.22292
Downregulated ICi-treated vs. naive	Class I	+	14638	353	10386	162	0.64681	1.3008e-23	1.3008e-23
Downregulated ICi-treated vs. naive	KEGG name	Necroptosis	14638	353	129	2	0.64291	0.21649	0.38284
Downregulated ICi-treated vs. naive	KEGG name	Parkinson disease	14638	353	129	2	0.64291	0.21649	0.38284
Downregulated ICi-treated vs. naive	KEGG name	Arachidonic acid metabolism	14638	353	395	6	0.62988	0.074337	0.29073
Downregulated ICi-treated vs. naive	KEGG name	MicroRNAs in cancer	14638	353	533	8	0.6224	0.046521	0.29073
Downregulated ICi-treated vs. naive	KEGG name	Olfactory transduction	14638	353	402	6	0.61892	0.069546	0.29073
Downregulated ICi-treated vs. naive	KEGG name	mRNA surveillance pathway	14638	353	473	7	0.61368	0.053678	0.29073
Downregulated ICi-treated vs. naive	T: Best coverage type	Alt+Ref	14638	353	1866	27	0.60001	0.00064441	0.0025776
Downregulated ICi-treated vs. naive	KEGG name	Hippo signaling pathway	14638	353	503	7	0.57708	0.039389	0.29073
Downregulated ICi-treated vs. naive	KEGG name	Spliceosome	14638	353	518	7	0.56037	0.033397	0.29073
Downregulated ICi-treated vs. naive	KEGG name	Ribosome biogenesis in eukaryotes	14638	353	447	6	0.55661	0.04339	0.29073
Downregulated ICi-treated vs. naive	KEGG name	RNA degradation	14638	353	447	6	0.55661	0.04339	0.29073
Downregulated ICi-treated vs. naive	KEGG name	Linoleic acid metabolism	14638	353	373	5	0.55586	0.058974	0.29073
Downregulated ICi-treated vs. naive	KEGG name	alpha-Linolenic acid metabolism	14638	353	376	5	0.55143	0.057012	0.29073
Downregulated ICi-treated vs. naive	KEGG name	Phenylalanine metabolism	14638	353	379	5	0.54706	0.055097	0.29073
Downregulated ICi-treated vs. naive	KEGG name	Vitamin digestion and absorption	14638	353	380	5	0.54562	0.054469	0.29073
Downregulated ICi-treated vs. naive	KEGG name	Fat digestion and absorption	14638	353	384	5	0.53994	0.052009	0.29073
Downregulated ICi-treated vs. naive	KEGG name	Vascular smooth muscle contraction	14638	353	464	6	0.53622	0.03567	0.29073
Downregulated ICi-treated vs. naive	KEGG name	Retinol metabolism	14638	353	387	5	0.53575	0.050218	0.29073
Downregulated ICi-treated vs. naive	KEGG name	Mucin type O-glycan biosynthesis	14638	353	388	5	0.53437	0.049631	0.29073
Downregulated ICi-treated vs. naive	KEGG name	Histidine metabolism	14638	353	389	5	0.533	0.04905	0.29073
Downregulated ICi-treated vs. naive	KEGG name	Renal cell carcinoma	14638	353	78	1	0.53163	0.28722	0.41083
Downregulated ICi-treated vs. naive	KEGG name	Tyrosine metabolism	14638	353	393	5	0.52758	0.046774	0.29073
Downregulated ICi-treated vs. naive	KEGG name	beta-Alanine metabolism	14638	353	393	5	0.52758	0.046774	0.29073
Downregulated ICi-treated vs. naive	KEGG name	Ether lipid metabolism	14638	353	394	5	0.52624	0.046218	0.29073
Downregulated ICi-treated vs. naive	KEGG name	Circadian rhythm	14638	353	395	5	0.5249	0.045667	0.29073
Downregulated ICi-treated vs. naive	KEGG name	Oocyte meiosis	14638	353	480	6	0.51834	0.02943	0.29073
Downregulated ICi-treated vs. naive	KEGG name	Chemical carcinogenesis	14638	353	405	5	0.51194	0.04043	0.29073
Downregulated ICi-treated vs. naive	KEGG name	Aminoacyl-tRNA biosynthesis	14638	353	412	5	0.50325	0.037053	0.29073
Downregulated ICi-treated vs. naive	KEGG name	Cholesterol metabolism	14638	353	412	5	0.50325	0.037053	0.29073
Downregulated ICi-treated vs. naive	KEGG name	Arginine and proline metabolism	14638	353	414	5	0.50081	0.036131	0.29073
Downregulated ICi-treated vs. naive	KEGG name	Chronic myeloid leukemia	14638	353	83	1	0.49961	0.27042	0.39759
Downregulated ICi-treated vs. naive	KEGG name	Huntington disease	14638	353	170	2	0.48785	0.13782	0.298
Downregulated ICi-treated vs. naive	KEGG name	Ribosome	14638	353	510	6	0.48785	0.020134	0.29073
Downregulated ICi-treated vs. naive	KEGG name	PPAR signaling pathway	14638	353	429	5	0.4833	0.029792	0.29073
Downregulated ICi-treated vs. naive	KEGG name	Peroxisome	14638	353	439	5	0.47229	0.0261	0.29073
Downregulated ICi-treated vs. naive	KEGG name	Colorectal cancer	14638	353	88	1	0.47122	0.25368	0.39759
Downregulated ICi-treated vs. naive	KEGG name	RNA transport	14638	353	538	6	0.46246	0.013842	0.29073
Downregulated ICi-treated vs. naive	KEGG name	ECM-receptor interaction	14638	353	90	1	0.46075	0.24704	0.39759
Downregulated ICi-treated vs. naive	KEGG name	Progesterone-mediated oocyte maturation	14638	353	453	5	0.4577	0.021586	0.29073
Downregulated ICi-treated vs. naive	KEGG name	Gastric cancer	14638	353	468	5	0.44303	0.017512	0.29073
Downregulated ICi-treated vs. naive	KEGG name	Parathyroid hormone synthesis, secretion and action	14638	353	96	1	0.43195	0.22749	0.39085
Downregulated ICi-treated vs. naive	Reactome name	Metabolism of RNA	14638	353	788	7	0.36837	0.00073721	0.098325
Downregulated ICi-treated vs. naive	KEGG name	Oxidative phosphorylation	14638	353	121	1	0.34271	0.15531	0.3182
Downregulated ICi-treated vs. naive	KEGG name	FoxO signaling pathway	14638	353	125	1	0.33174	0.14544	0.30501
Downregulated ICi-treated vs. naive	KEGG name	Cell cycle	14638	353	128	1	0.32396	0.13836	0.298
Downregulated ICi-treated vs. naive	Reactome name	Transcriptional Regulation by TP53	14638	353	391	3	0.31816	0.01009	0.41141
Downregulated ICi-treated vs. naive	KEGG name	Lysosome	14638	353	135	1	0.30717	0.12287	0.29073
Downregulated ICi-treated vs. naive	KEGG name	Non-alcoholic fatty liver disease (NAFLD)	14638	353	137	1	0.30268	0.11871	0.29073
Downregulated ICi-treated vs. naive	All	+	14638	353	1044	7	0.27804	7.6974e-06	7.6974e-06
Downregulated ICi-treated vs. naive	Reactome name	DNA Repair	14638	353	317	2	0.26162	0.012756	0.46935
Downregulated ICi-treated vs. naive	Reactome name	Translation	14638	353	328	2	0.25285	0.010395	0.41141
Downregulated ICi-treated vs. naive	KEGG name	Protein processing in endoplasmic reticulum	14638	353	180	1	0.23037	0.054133	0.29073
Downregulated ICi-treated vs. naive	Reactome name	Cell Cycle, Mitotic	14638	353	545	3	0.22826	0.00058185	0.082778
Downregulated ICi-treated vs. naive	Reactome name	M Phase	14638	353	394	2	0.21049	0.0029028	0.25627
Downregulated ICi-treated vs. naive	Reactome name	Cell Cycle	14638	353	648	3	0.19198	7.2716e-05	0.017242
Downregulated ICi-treated vs. naive	Reactome name	Cell Cycle Checkpoints	14638	353	292	1	0.14201	0.0054955	0.3007
Up-regulated ICi-treated vs. naive	Reactome name	Metabolism of ingested SeMet, Sec, MeSec into H2Se	14638	239	9	3	20.416	0.00032755	0.233
Up-regulated ICi-treated vs. naive	treated_x/y_naive B significant	+	14638	239	436	135	18.964	9.6218e-148	9.6218e-148
Up-regulated ICi-treated vs. naive	KEGG name	Valine, leucine and isoleucine biosynthesis	14638	239	4	1	15.312	0.062175	0.42156
Up-regulated ICi-treated vs. naive	KEGG name	Phototransduction	14638	239	11	2	11.136	0.012606	0.42156
Up-regulated ICi-treated vs. naive	KEGG name	ABC transporters	14638	239	30	4	8.1662	0.0012467	0.41889
Up-regulated ICi-treated vs. naive	KEGG name	Ascorbate and aldarate metabolism	14638	239	9	1	6.8052	0.12888	0.42156
Up-regulated ICi-treated vs. naive	KEGG name	Primary bile acid biosynthesis	14638	239	10	1	6.1247	0.14087	0.42156
Up-regulated ICi-treated vs. naive	KEGG name	Pentose and glucuronate interconversions	14638	239	21	2	5.833	0.040876	0.42156
Up-regulated ICi-treated vs. naive	KEGG name	Glycosphingolipid biosynthesis - lacto and neolacto series	14638	239	14	1	4.3748	0.18469	0.44969
Up-regulated ICi-treated vs. naive	Reactome name	Biological oxidations	14638	239	140	10	4.3748	8.1555e-05	0.087019
Up-regulated ICi-treated vs. naive	KEGG name	Glycosaminoglycan biosynthesis - heparan sulfate / heparin	14638	239	15	1	4.0831	0.19466	0.45739
Up-regulated ICi-treated vs. naive	KEGG name	Antifolate resistance	14638	239	31	2	3.9514	0.076857	0.42156
Up-regulated ICi-treated vs. naive	KEGG name	Cysteine and methionine metabolism	14638	239	48	3	3.8279	0.035737	0.42156
Up-regulated ICi-treated vs. naive	KEGG name	Regulation of lipolysis in adipocytes	14638	239	49	3	3.7498	0.037451	0.42156
Up-regulated ICi-treated vs. naive	KEGG name	Ovarian steroidogenesis	14638	239	33	2	3.7119	0.084461	0.42156
Up-regulated ICi-treated vs. naive	KEGG name	Alanine, aspartate and glutamate metabolism	14638	239	36	2	3.4026	0.09595	0.42156
Up-regulated ICi-treated vs. naive	KEGG name	Sphingolipid metabolism	14638	239	37	2	3.3106	0.099787	0.42156
Up-regulated ICi-treated vs. naive	KEGG name	Other glycan degradation	14638	239	19	1	3.2235	0.23091	0.45809
Up-regulated ICi-treated vs. naive	KEGG name	Melanogenesis	14638	239	77	4	3.1817	0.028691	0.42156
Up-regulated ICi-treated vs. naive	KEGG name	Propanoate metabolism	14638	239	40	2	3.0623	0.11127	0.42156
Up-regulated ICi-treated vs. naive	KEGG name	2-Oxocarboxylic acid metabolism	14638	239	20	1	3.0623	0.2391	0.45809
Up-regulated ICi-treated vs. naive	KEGG name	Bile secretion	14638	239	40	2	3.0623	0.11127	0.42156
Up-regulated ICi-treated vs. naive	KEGG name	Pyruvate metabolism	14638	239	41	2	2.9877	0.11507	0.42156
Up-regulated ICi-treated vs. naive	KEGG name	Folate biosynthesis	14638	239	21	1	2.9165	0.24697	0.45809
Up-regulated ICi-treated vs. naive	KEGG name	Endocrine resistance	14638	239	87	4	2.8159	0.040104	0.42156
Up-regulated ICi-treated vs. naive	KEGG name	Steroid hormone biosynthesis	14638	239	22	1	2.7839	0.25452	0.45809
Up-regulated ICi-treated vs. naive	KEGG name	Glioma	14638	239	68	3	2.7021	0.074714	0.42156
Up-regulated ICi-treated vs. naive	KEGG name	Central carbon metabolism in cancer	14638	239	70	3	2.6249	0.078985	0.42156
Up-regulated ICi-treated vs. naive	KEGG name	Mismatch repair	14638	239	24	1	2.552	0.26869	0.45809
Up-regulated ICi-treated vs. naive	KEGG name	Arginine biosynthesis	14638	239	24	1	2.552	0.26869	0.45809
Up-regulated ICi-treated vs. naive	KEGG name	Breast cancer	14638	239	97	4	2.5256	0.053043	0.42156
Up-regulated ICi-treated vs. naive	KEGG name	Rap1 signaling pathway	14638	239	200	8	2.4499	0.011428	0.42156
Up-regulated ICi-treated vs. naive	KEGG name	Biosynthesis of amino acids	14638	239	77	3	2.3862	0.094144	0.42156
Up-regulated ICi-treated vs. naive	KEGG name	EGFR tyrosine kinase inhibitor resistance	14638	239	78	3	2.3556	0.096323	0.42156
Up-regulated ICi-treated vs. naive	KEGG name	Vasopressin-regulated water reabsorption	14638	239	53	2	2.3112	0.15888	0.42156
Up-regulated ICi-treated vs. naive	KEGG name	Long-term depression	14638	239	53	2	2.3112	0.15888	0.42156
Up-regulated ICi-treated vs. naive	KEGG name	Prolactin signaling pathway	14638	239	54	2	2.2684	0.16231	0.42156
Up-regulated ICi-treated vs. naive	KEGG name	Melanoma	14638	239	54	2	2.2684	0.16231	0.42156
Up-regulated ICi-treated vs. naive	KEGG name	Cholinergic synapse	14638	239	84	3	2.1874	0.10937	0.42156
Up-regulated ICi-treated vs. naive	KEGG name	Glycine, serine and threonine metabolism	14638	239	28	1	2.1874	0.29354	0.47125
Up-regulated ICi-treated vs. naive	KEGG name	Renin secretion	14638	239	56	2	2.1874	0.16904	0.42706
Up-regulated ICi-treated vs. naive	KEGG name	GABAergic synapse	14638	239	57	2	2.149	0.17234	0.42894
Up-regulated ICi-treated vs. naive	KEGG name	Relaxin signaling pathway	14638	239	115	4	2.1303	0.078921	0.42156
Up-regulated ICi-treated vs. naive	KEGG name	Tryptophan metabolism	14638	239	29	1	2.112	0.29907	0.47125
Up-regulated ICi-treated vs. naive	T: Best coverage type	Alt	14638	239	700	24	2.0999	0.00028845	0.0011538
Up-regulated ICi-treated vs. naive	KEGG name	Prostate cancer	14638	239	88	3	2.088	0.11799	0.42156
Up-regulated ICi-treated vs. naive	KEGG name	Longevity regulating pathway - multiple species	14638	239	60	2	2.0416	0.18196	0.44955
Up-regulated ICi-treated vs. naive	KEGG name	Aldosterone-regulated sodium reabsorption	14638	239	31	1	1.9757	0.30937	0.47125
Up-regulated ICi-treated vs. naive	KEGG name	Estrogen signaling pathway	14638	239	94	3	1.9547	0.13065	0.42156
Up-regulated ICi-treated vs. naive	KEGG name	Salmonella infection	14638	239	96	3	1.914	0.13478	0.42156
Up-regulated ICi-treated vs. naive	KEGG name	VEGF signaling pathway	14638	239	64	2	1.914	0.1941	0.45739
Up-regulated ICi-treated vs. naive	KEGG name	Axon guidance	14638	239	161	5	1.9021	0.07521	0.42156
Up-regulated ICi-treated vs. naive	KEGG name	Wnt signaling pathway	14638	239	131	4	1.8701	0.10301	0.42156
Up-regulated ICi-treated vs. naive	KEGG name	Type I diabetes mellitus	14638	239	33	1	1.856	0.31868	0.47125
Up-regulated ICi-treated vs. naive	KEGG name	Carbohydrate digestion and absorption	14638	239	33	1	1.856	0.31868	0.47125
Up-regulated ICi-treated vs. naive	KEGG name	Acute myeloid leukemia	14638	239	68	2	1.8014	0.2054	0.45809
Up-regulated ICi-treated vs. naive	KEGG name	Phosphatidylinositol signaling system	14638	239	102	3	1.8014	0.14682	0.42156
Up-regulated ICi-treated vs. naive	KEGG name	Mineral absorption	14638	239	34	1	1.8014	0.32299	0.47125
Up-regulated ICi-treated vs. naive	KEGG name	Alcoholism	14638	239	103	3	1.7839	0.14877	0.42156
Up-regulated ICi-treated vs. naive	KEGG name	Circadian entrainment	14638	239	69	2	1.7753	0.20809	0.45809
Up-regulated ICi-treated vs. naive	KEGG name	Non-small cell lung cancer	14638	239	70	2	1.7499	0.21073	0.45809
Up-regulated ICi-treated vs. naive	KEGG name	Fatty acid degradation	14638	239	35	1	1.7499	0.32707	0.47125
Up-regulated ICi-treated vs. naive	KEGG name	Cocaine addiction	14638	239	35	1	1.7499	0.32707	0.47125
Up-regulated ICi-treated vs. naive	KEGG name	Growth hormone synthesis, secretion and action	14638	239	108	3	1.7013	0.15824	0.42156
Up-regulated ICi-treated vs. naive	KEGG name	Nicotinate and nicotinamide metabolism	14638	239	36	1	1.7013	0.33093	0.47125
Up-regulated ICi-treated vs. naive	KEGG name	Type II diabetes mellitus	14638	239	37	1	1.6553	0.33458	0.47125
Up-regulated ICi-treated vs. naive	KEGG name	HIF-1 signaling pathway	14638	239	112	3	1.6405	0.16546	0.42156
Up-regulated ICi-treated vs. naive	KEGG name	Platinum drug resistance	14638	239	75	2	1.6332	0.22307	0.45809
Up-regulated ICi-treated vs. naive	KEGG name	Aldosterone synthesis and secretion	14638	239	77	2	1.5908	0.22761	0.45809
Up-regulated ICi-treated vs. naive	KEGG name	Yersinia infection	14638	239	154	4	1.5908	0.13603	0.42156
Up-regulated ICi-treated vs. naive	KEGG name	GnRH secretion	14638	239	39	1	1.5704	0.34126	0.47125
Up-regulated ICi-treated vs. naive	KEGG name	Inflammatory mediator regulation of TRP channels	14638	239	79	2	1.5506	0.23193	0.45809
Up-regulated ICi-treated vs. naive	KEGG name	Inositol phosphate metabolism	14638	239	80	2	1.5312	0.23401	0.45809
Up-regulated ICi-treated vs. naive	KEGG name	Malaria	14638	239	40	1	1.5312	0.3443	0.47125
[truncated: 197 more rows]

## Sheet: Sheet 3
Interaction network of omics significantly changing entries for comparison between ICi-treated and naïve patients
[truncated: 50 more rows]
